# Supplementary material for: Trisomy 21 consistently activates the interferon response
Source: eLife journal article supplement (doi:10.7554/elife.16220), 2016-07-29
Supplement: supp [file elife-16220-supp-v1.zip]

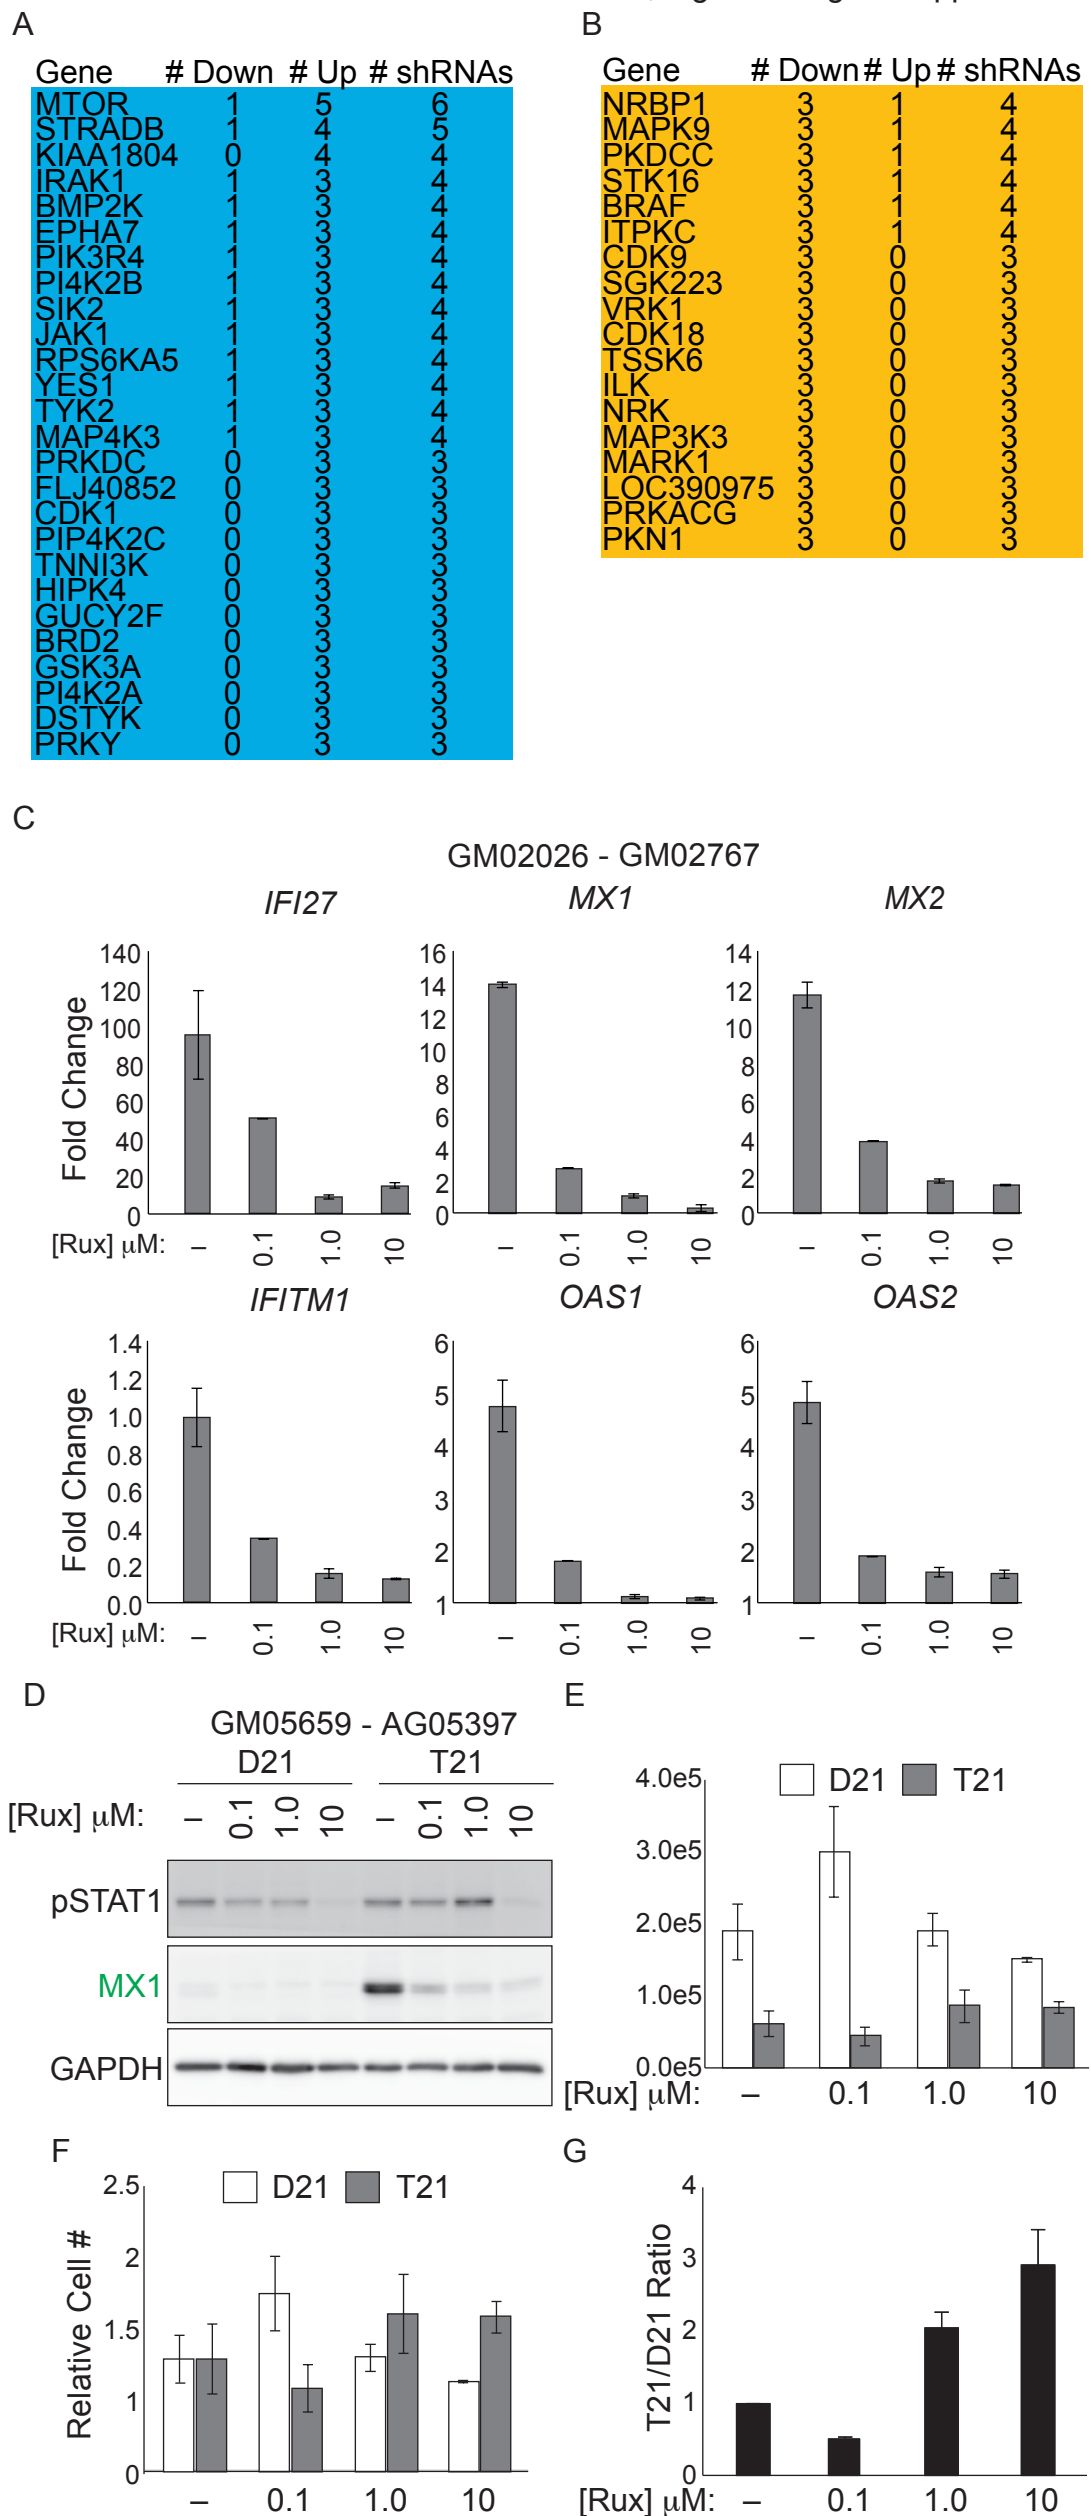

**Figure 4 – figure supplement 1. An shRNA screen identifies Differential Modulators of T21 (DM<sup>T21</sup>) cellular fitness. (A, B)** shRNAs targeting DM<sup>T21</sup> genes that differentially inhibit T21 (blue) or D21 (yellow) cellular fitness. **(C)** Q-RT-PCR demonstrating that Ruxolitinib (Rux) treatment downregulates mRNA expression for many ISGs in a dose-dependent manner. **(D)** Western blots demonstrating effect of Rux treatment on pSTAT1 and MX1 on the cell line pair GM05659 (D21) and AG05397 (T21) (pair 2). **(E)** Absolute cell numbers from pair 2 grown for 72 hours in their respective conditioned media with the indicated doses of Rux. **(F)** Relative cell numbers from (E). **(G)** Ratio of T21:D21 relative cell numbers demonstrates the overall differential effect of Rux on the number of viable cells from this T21-D21 pair. All data shown are an average of three experiments  $\pm$  standard error of the mean.
