# Supplementary material for: Trisomy 21 consistently activates the interferon response
Source: eLife journal article supplement (doi:10.7554/elife.16220), 2016-07-29
Supplement: supp [file elife-16220-supp-v1.zip]

MYCN Signature (Monocytes)

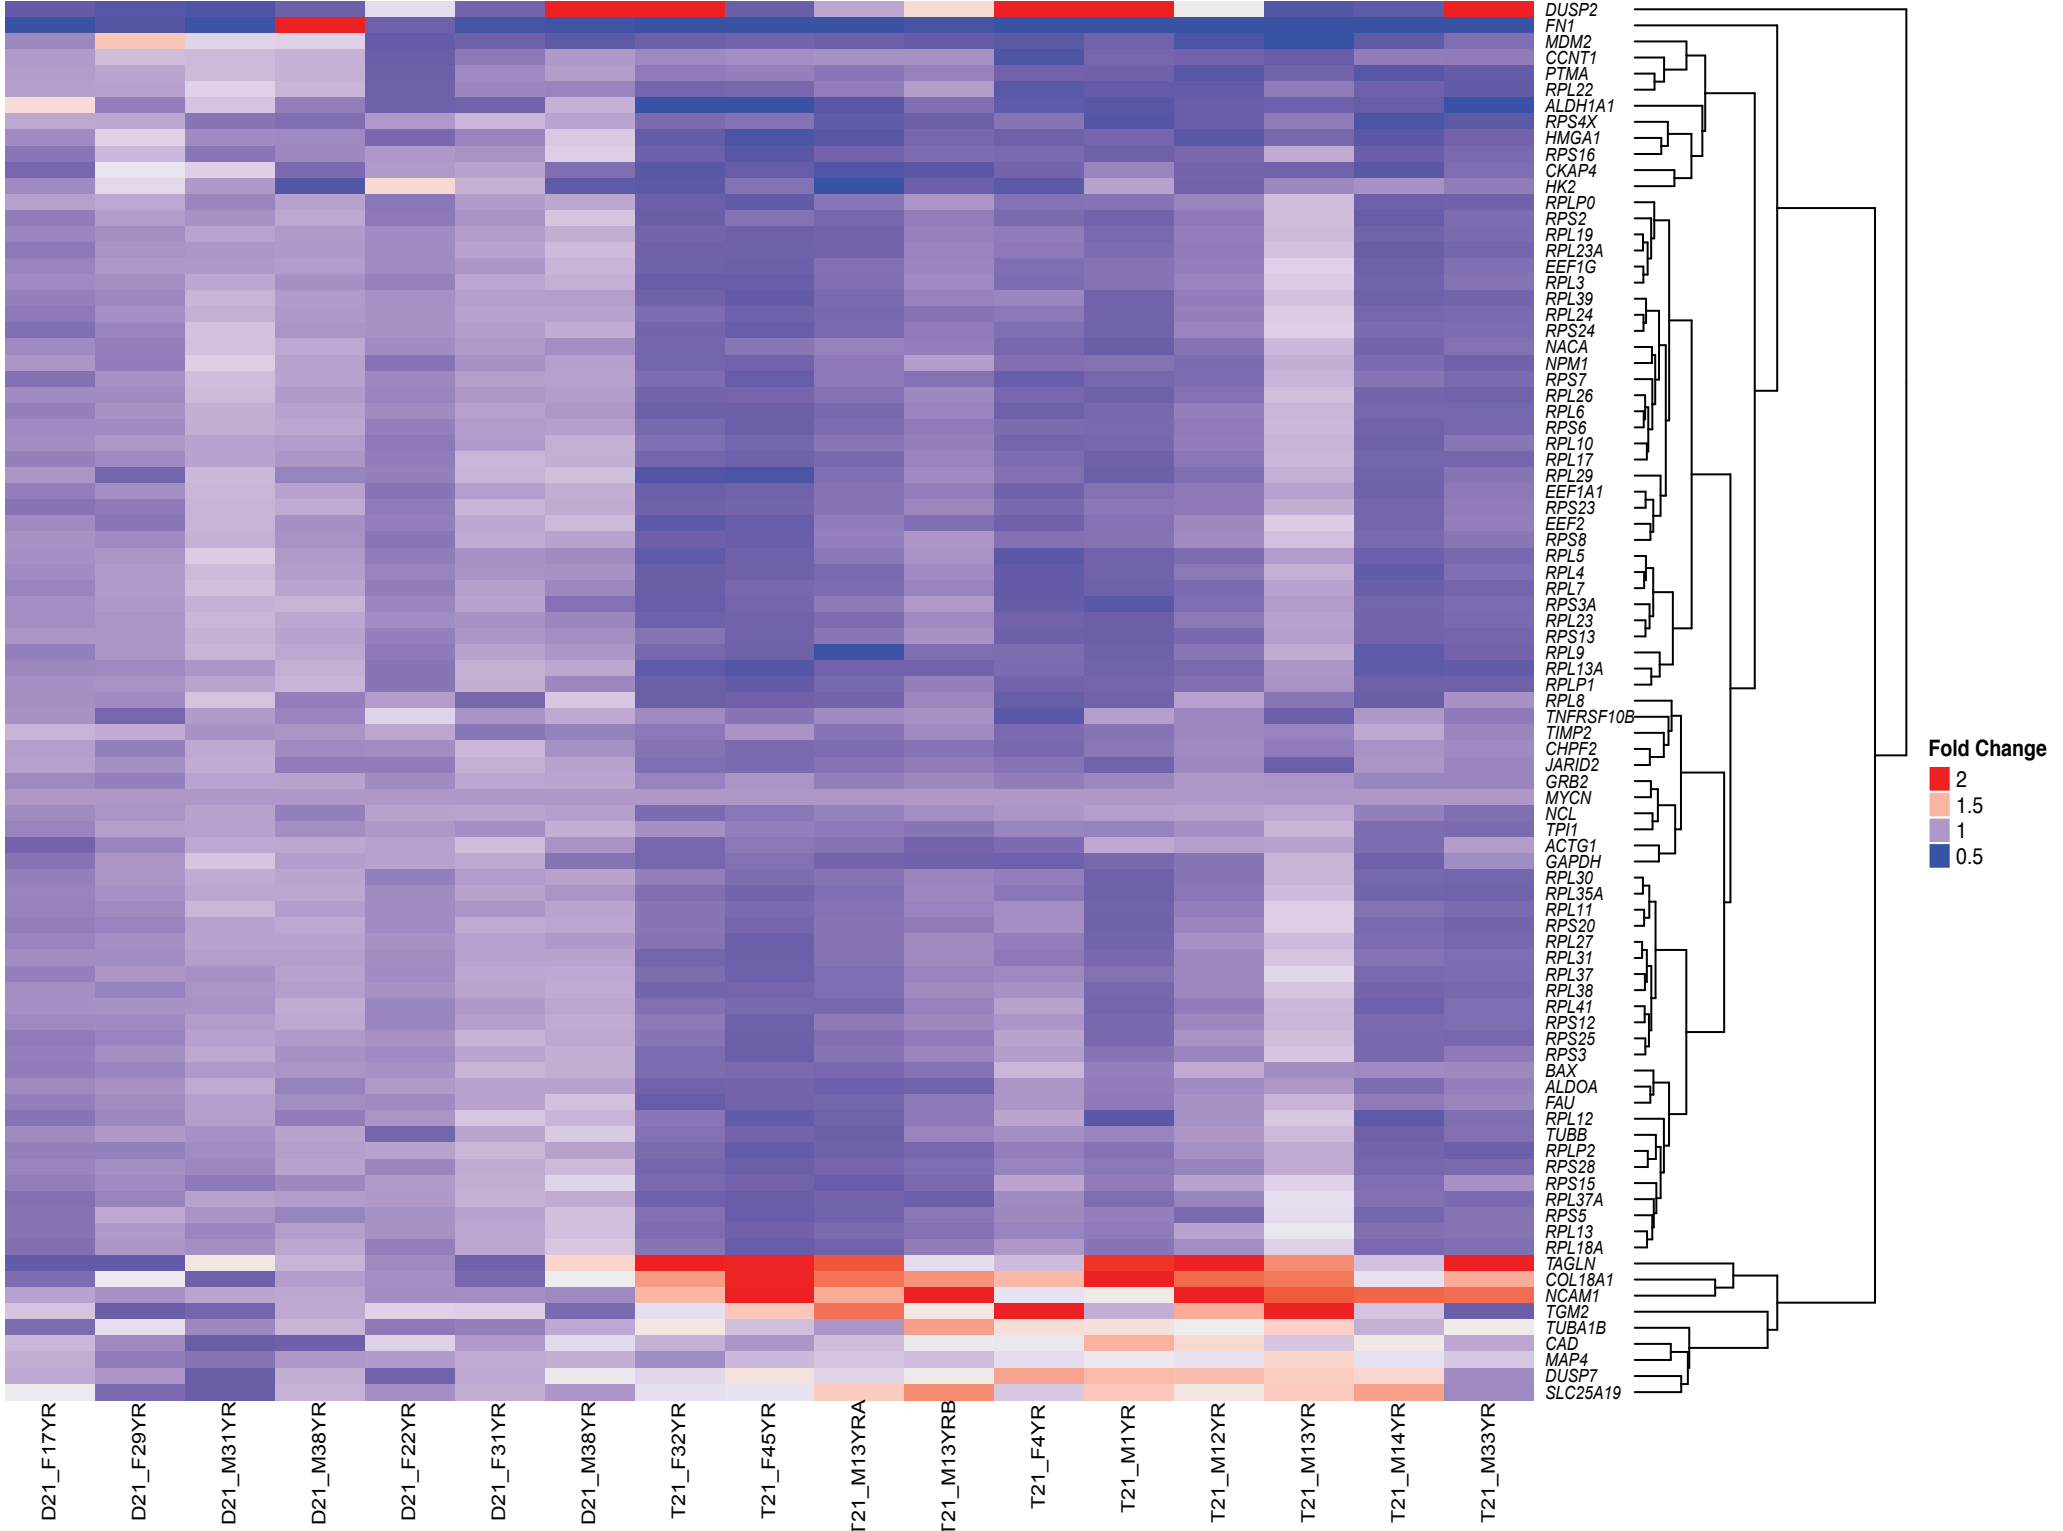

**Figure 7 – figure supplement 1. The MYCN transcriptional program is downregulated by T21.** A heatmap demonstrates downregulation of numerous components of the translational machinery associated with MYCN-driven transcription in monocytes from individuals with T21. Data presented are the fold change of the RPKM of each sample relative to the mean RPKM of all D21 individuals.
