# Supplementary material for: Trisomy 21 consistently activates the interferon response
Source: eLife journal article supplement (doi:10.7554/elife.16220), 2016-07-29
Supplement: supp [file elife-16220-supp-v1.zip]

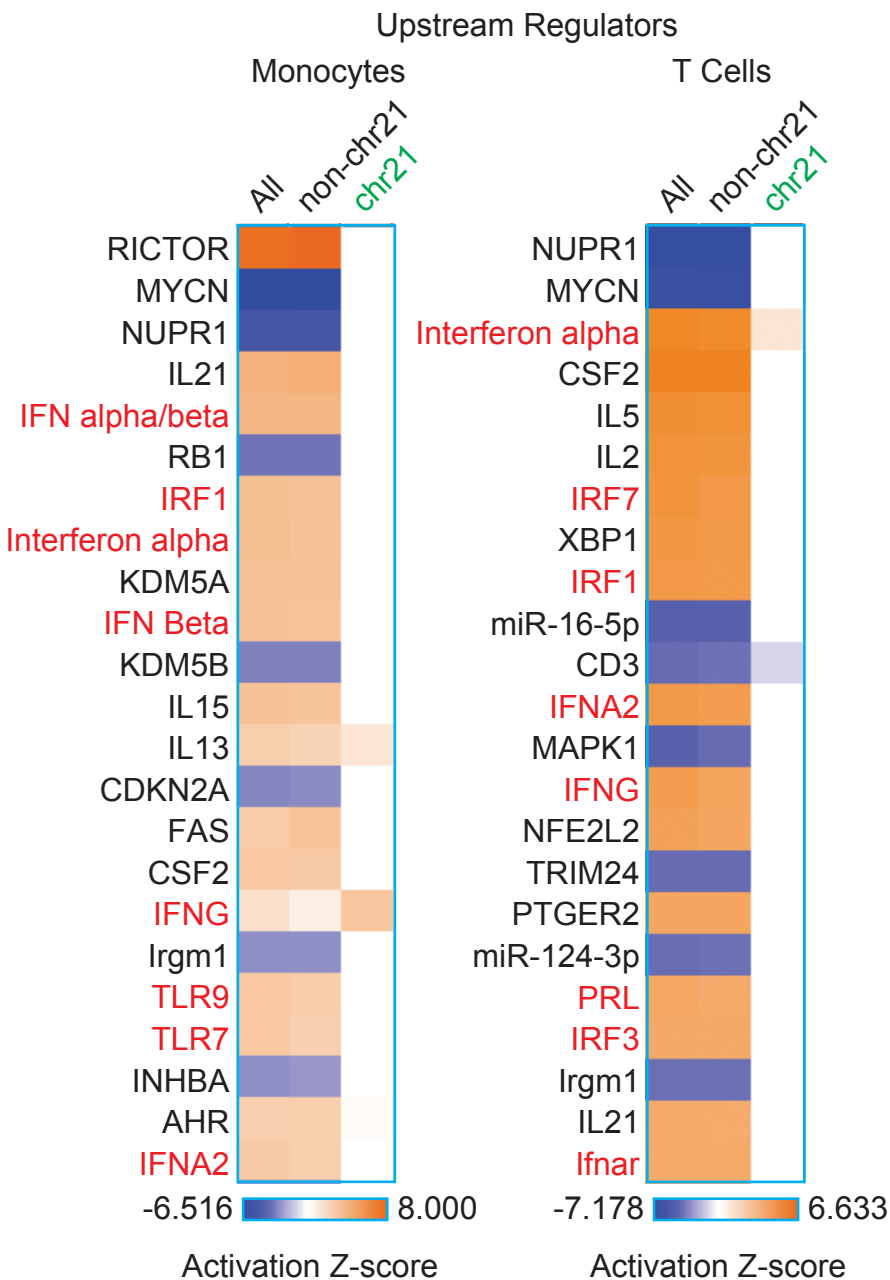

**Figure 6 – figure supplement 3. The IFN gene signature from monocytes and T cells is largely encoded by non-chr21 genes.** IPA upstream regulator analysis of all DEGs, non-chr21 DEGs, and chr21 DEGs, for monocytes and T cells.
