# Supplementary material for: Trisomy 21 consistently activates the interferon response
Source: eLife journal article supplement (doi:10.7554/elife.16220), 2016-07-29
Supplement: supp [file elife-16220-supp-v1.zip]

A

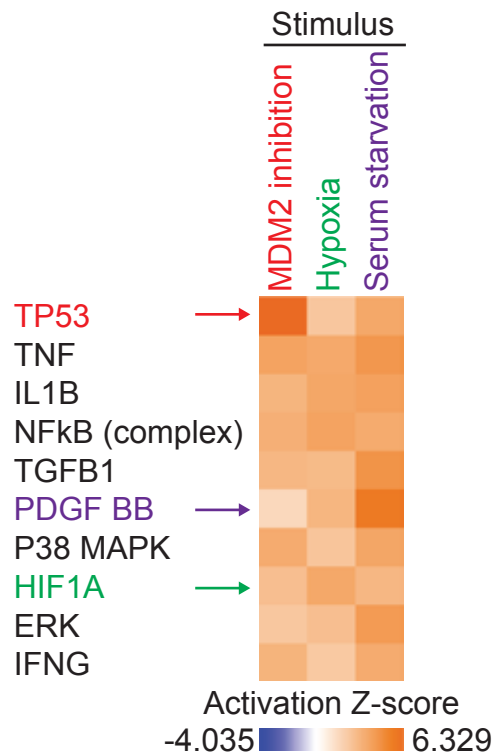

B

| Pathway                                            | # Genes in Pathway | # Observed | # Expected | adjusted p-value |
|----------------------------------------------------|--------------------|------------|------------|------------------|
| Signaling mediated by p38-gamma and p38-delta      | 11                 | 6          | 0.34       | 0.0001           |
| Interferon Signaling                               | 98                 | 14         | 3.05       | 0.0003           |
| Interferon alpha/beta signaling                    | 77                 | 12         | 2.4        | 0.0005           |
| Cytokine Signaling in Immune system                | 193                | 19         | 6          | 0.0008           |
| Signaling events mediated by focal adhesion kinase | 1288               | 56         | 40.07      | 0.0483           |
| Thrombin/protease-activated receptor (PAR) pathway | 1300               | 60         | 40.44      | 0.0483           |
| FOXA1 transcription factor network                 | 44                 | 6          | 1.37       | 0.0483           |
| S1P1 pathway                                       | 1288               | 56         | 40.07      | 0.0483           |
| IGF1 pathway                                       | 1291               | 56         | 40.16      | 0.0483           |
| Alpha9 beta1 integrin signaling events             | 1305               | 57         | 40.6       | 0.0483           |
| IFN-gamma pathway                                  | 1296               | 56         | 40.32      | 0.0483           |
| EGFR-dependent Endothelin signaling events         | 1289               | 56         | 40.1       | 0.0483           |
| BMP receptor signaling                             | 226                | 15         | 7.03       | 0.0483           |
| Arf6 trafficking events                            | 1288               | 56         | 40.07      | 0.0483           |
| EGF receptor (ErbB1) signaling pathway             | 1288               | 56         | 40.07      | 0.0483           |

C

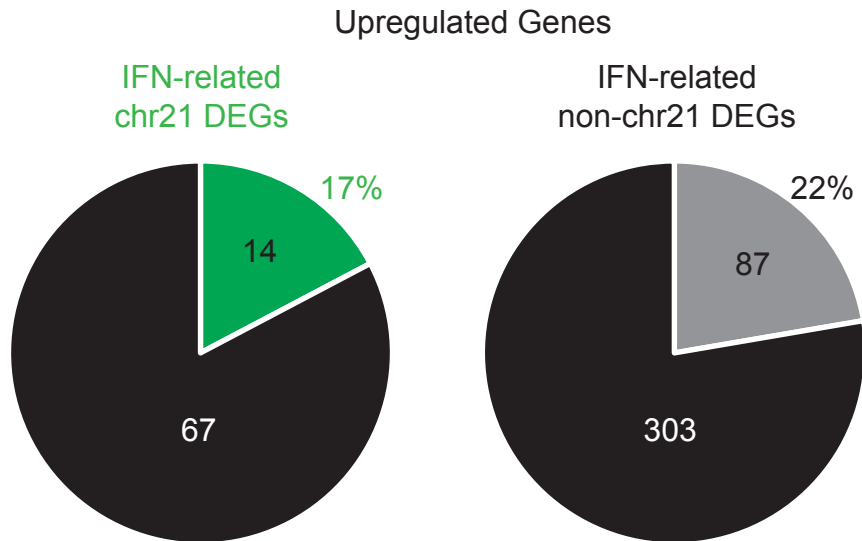

**Figure 2 – figure supplement 1. Network analysis confirms IFN activation signature in T21 cells.** (A) IPA upstream regulator analysis of genes activated upon MDM2 inhibition with Nutlin-3, hypoxia (1% O<sub>2</sub>), and serum stimulation in HCT116 colorectal cancer cells correctly identifies the transcription factor p53, the transcription factor HIF1A, and the growth factor PDGF, as the key upstream regulators in each scenario. (B) Top 15 deregulated pathways in T21 cells identified by Pathway Commons Analysis in WebGestalt. IFN-related pathways are highlighted in red. (C) Pie charts showing the percentage of chr21 and non-chr21 upregulated genes in the interferon pathway.
