# Supplementary material for: Trisomy 21 consistently activates the interferon response
Source: eLife journal article supplement (doi:10.7554/elife.16220), 2016-07-29
Supplement: supp [file elife-16220-supp-v1.zip]

A

| Line       | chr21 | Age |
|------------|-------|-----|
| TIC0001856 | D21   | 7   |
| TIC0001874 | D21   | 14  |
| TIC0002186 | D21   | 18  |
| TIC0003377 | T21   | 20  |
| TIC0001712 | T21   | 9   |
| TIC0001727 | T21   | 13  |

B

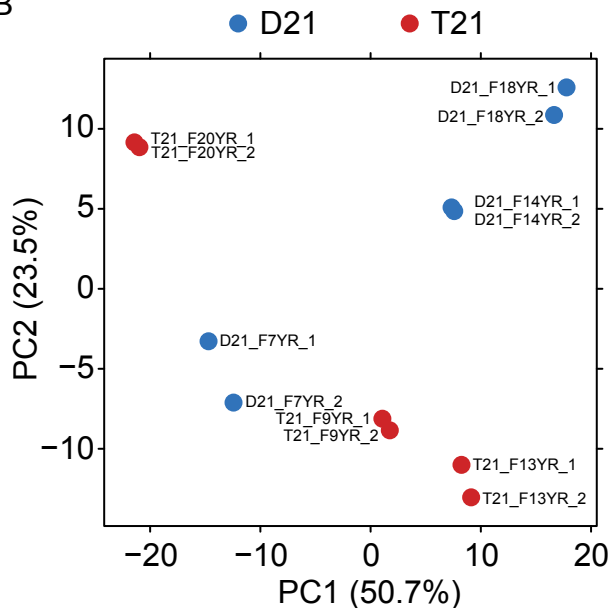

**Figure 5 – figure supplement 1. Biological replicates of lymphoblastoid samples are highly related.** (A) Table of lymphoblastoid cell lines used in this study. All lymphoblastoid lines used are female. (B) Principal component analysis (PCA) of RNA-seq samples from lymphoblastoid cell lines.
