# Supplementary material for: Trisomy 21 consistently activates the interferon response
Source: eLife journal article supplement (doi:10.7554/elife.16220), 2016-07-29
Supplement: supp [file elife-16220-supp-v1.zip]

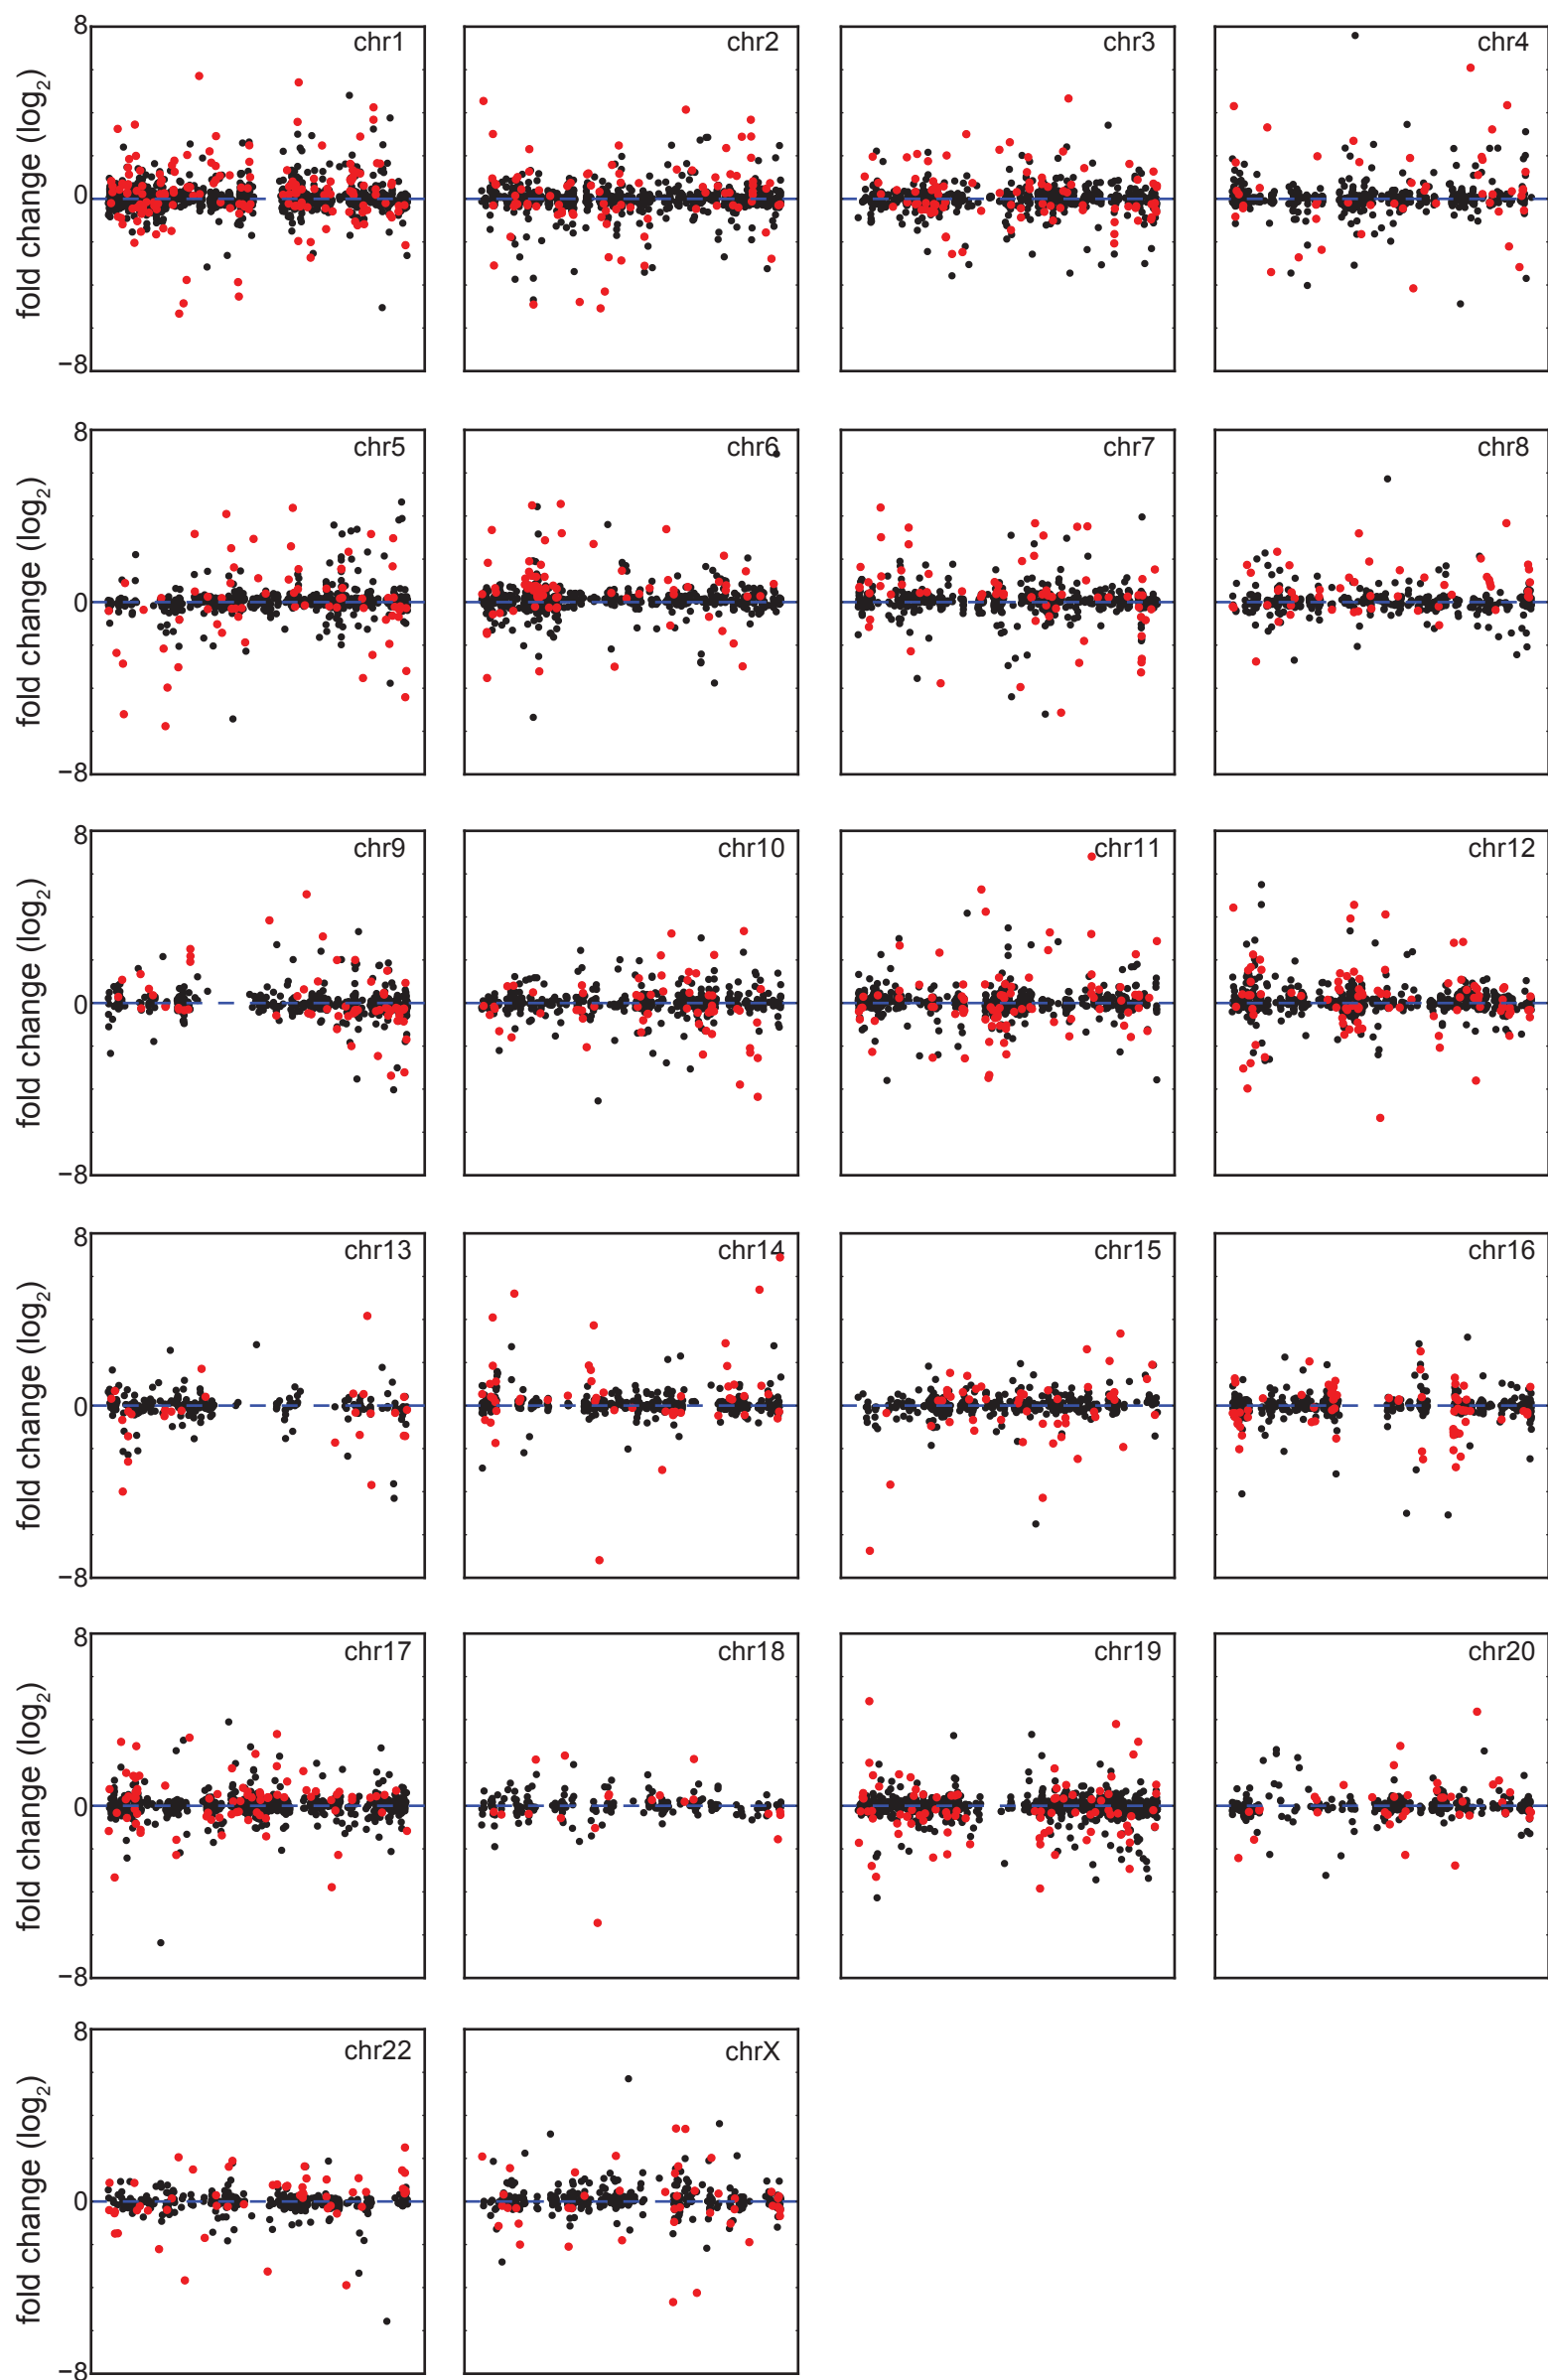

**Figure 5 – figure supplement 2. Differentially expressed genes in trisomy 21 lymphoblastoid cell lines are not organized into obvious chromatin domains.** Manhattan plots for individual chromosomes indicating differentially expressed genes in red.
