# Supplementary material for: Trisomy 21 consistently activates the interferon response
Source: eLife journal article supplement (doi:10.7554/elife.16220), 2016-07-29
Supplement: supp [file elife-16220-supp-v1.zip]

A

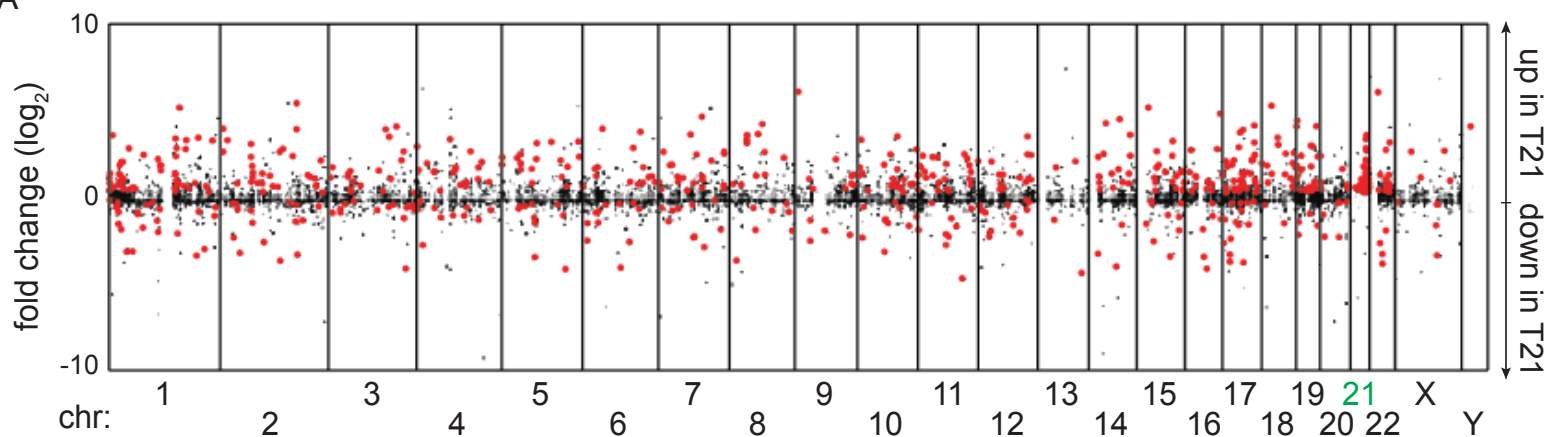

B

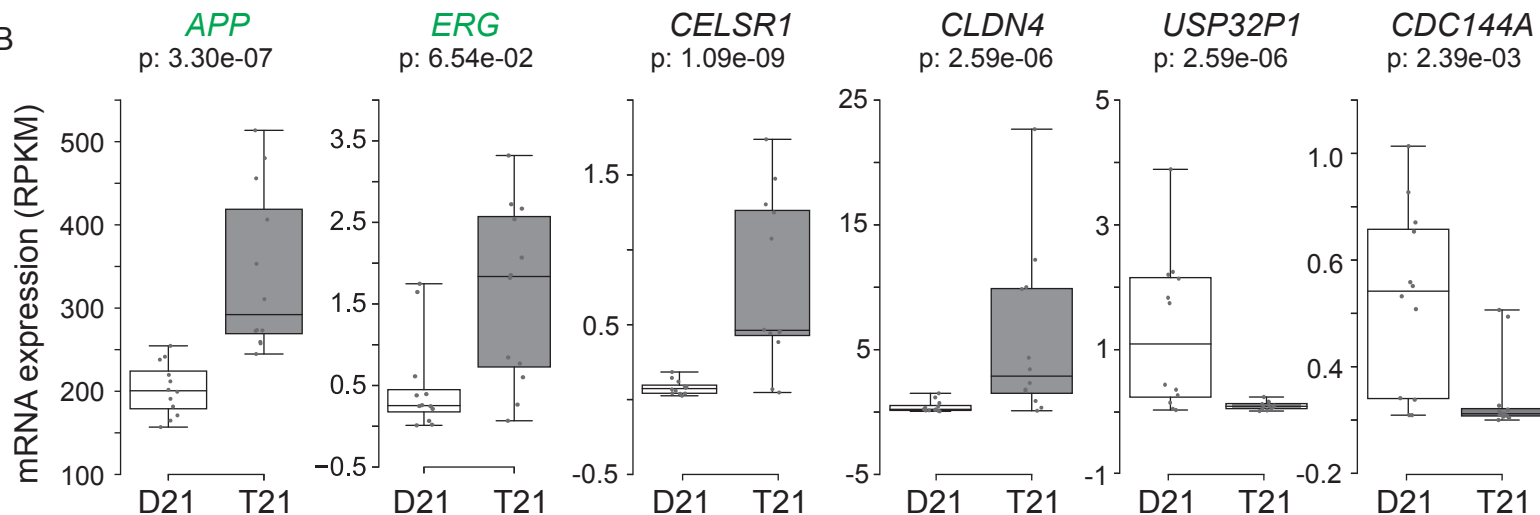

**Figure 1 – figure supplement 2. Amplification of changes in gene expression emanating from T21. (A)** Manhattan plot showing most DEGs (red) are not encoded on chr21. **(B)** Example box and whisker plots of chr21 (green) and non-chr21 (black) DEGs. mRNA expression values are displayed in reads per kilobase per million (RPKM). Benjamini-Hochberg adjusted p-values were calculated using DESeq2
