# Supplementary material for: Trisomy 21 consistently activates the interferon response
Source: eLife journal article supplement (doi:10.7554/elife.16220), 2016-07-29
Supplement: supp [file elife-16220-supp-v1.zip]

A

| Line    | chr21 | Age | Gender | Biopsy Site    |
|---------|-------|-----|--------|----------------|
| GM08447 | D21   | <1  | F      | Ear            |
| GM05659 | D21   | 1   | M      | Chest          |
| GM00969 | D21   | 2   | F      | Unspecified    |
| GM02036 | D21   | 11  | F      | Unspecified    |
| GM03377 | D21   | 19  | M      | Arm            |
| GM03440 | D21   | 20  | M      | Leg            |
| GM04616 | T21   | <1  | F      | Unspecified    |
| AG05397 | T21   | 1   | M      | Thorax         |
| AG06922 | T21   | 2   | M      | Thorax/Abdomen |
| GM02767 | T21   | 14  | F      | Unspecified    |
| AG08941 | T21   | 19  | F      | Arm            |
| AG08942 | T21   | 21  | F      | Arm            |

B

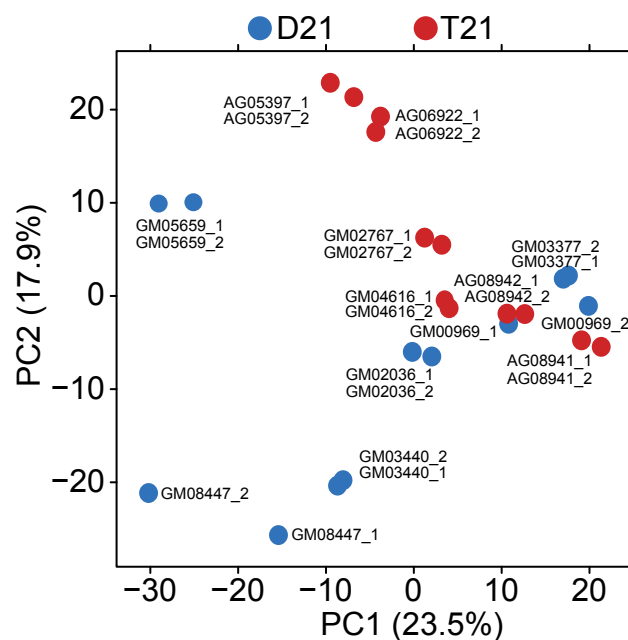

C

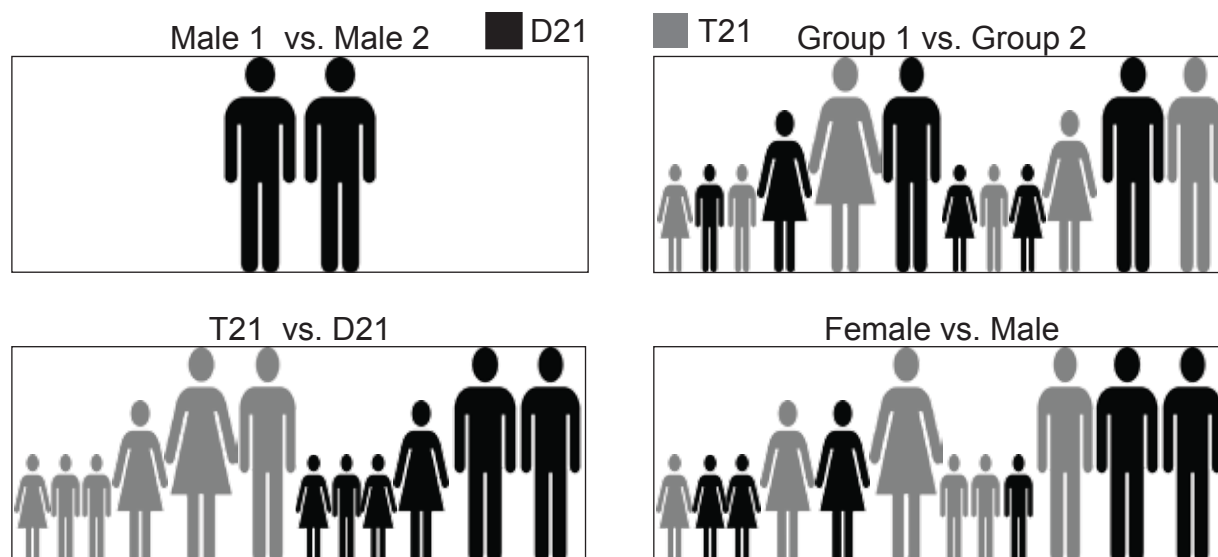

D

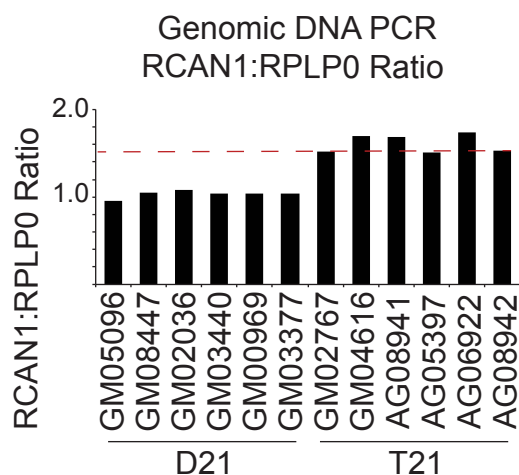

E

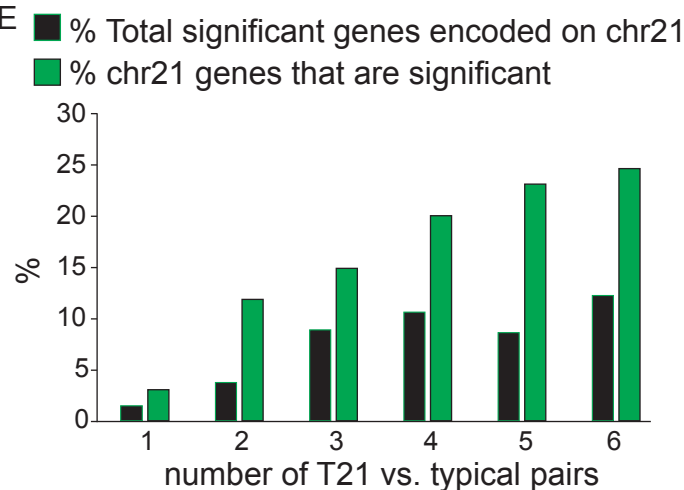

**Figure 1 – figure supplement 1. T21 and D21 fibroblast RNA-seq.** (A) Description of fibroblast cell lines used in this study. (B) Principal component analysis (PCA) of fibroblast RNA-seq samples demonstrates tight grouping of biological replicates. (C) Schematic of group comparisons. (D) PCR of genomic DNA for the RCAN1 gene encoded on chr21 confirms T21 status. RPLP0 is a control gene encoded on chr12. (E) Bar graph displaying how numbers of differentially expressed genes (DEGs) encoded on chr21 increase with sample size.
