# Supplementary material for: Trisomy 21 consistently activates the interferon response
Source: eLife journal article supplement (doi:10.7554/elife.16220), 2016-07-29
Supplement: supp [file elife-16220-supp-v1.zip]

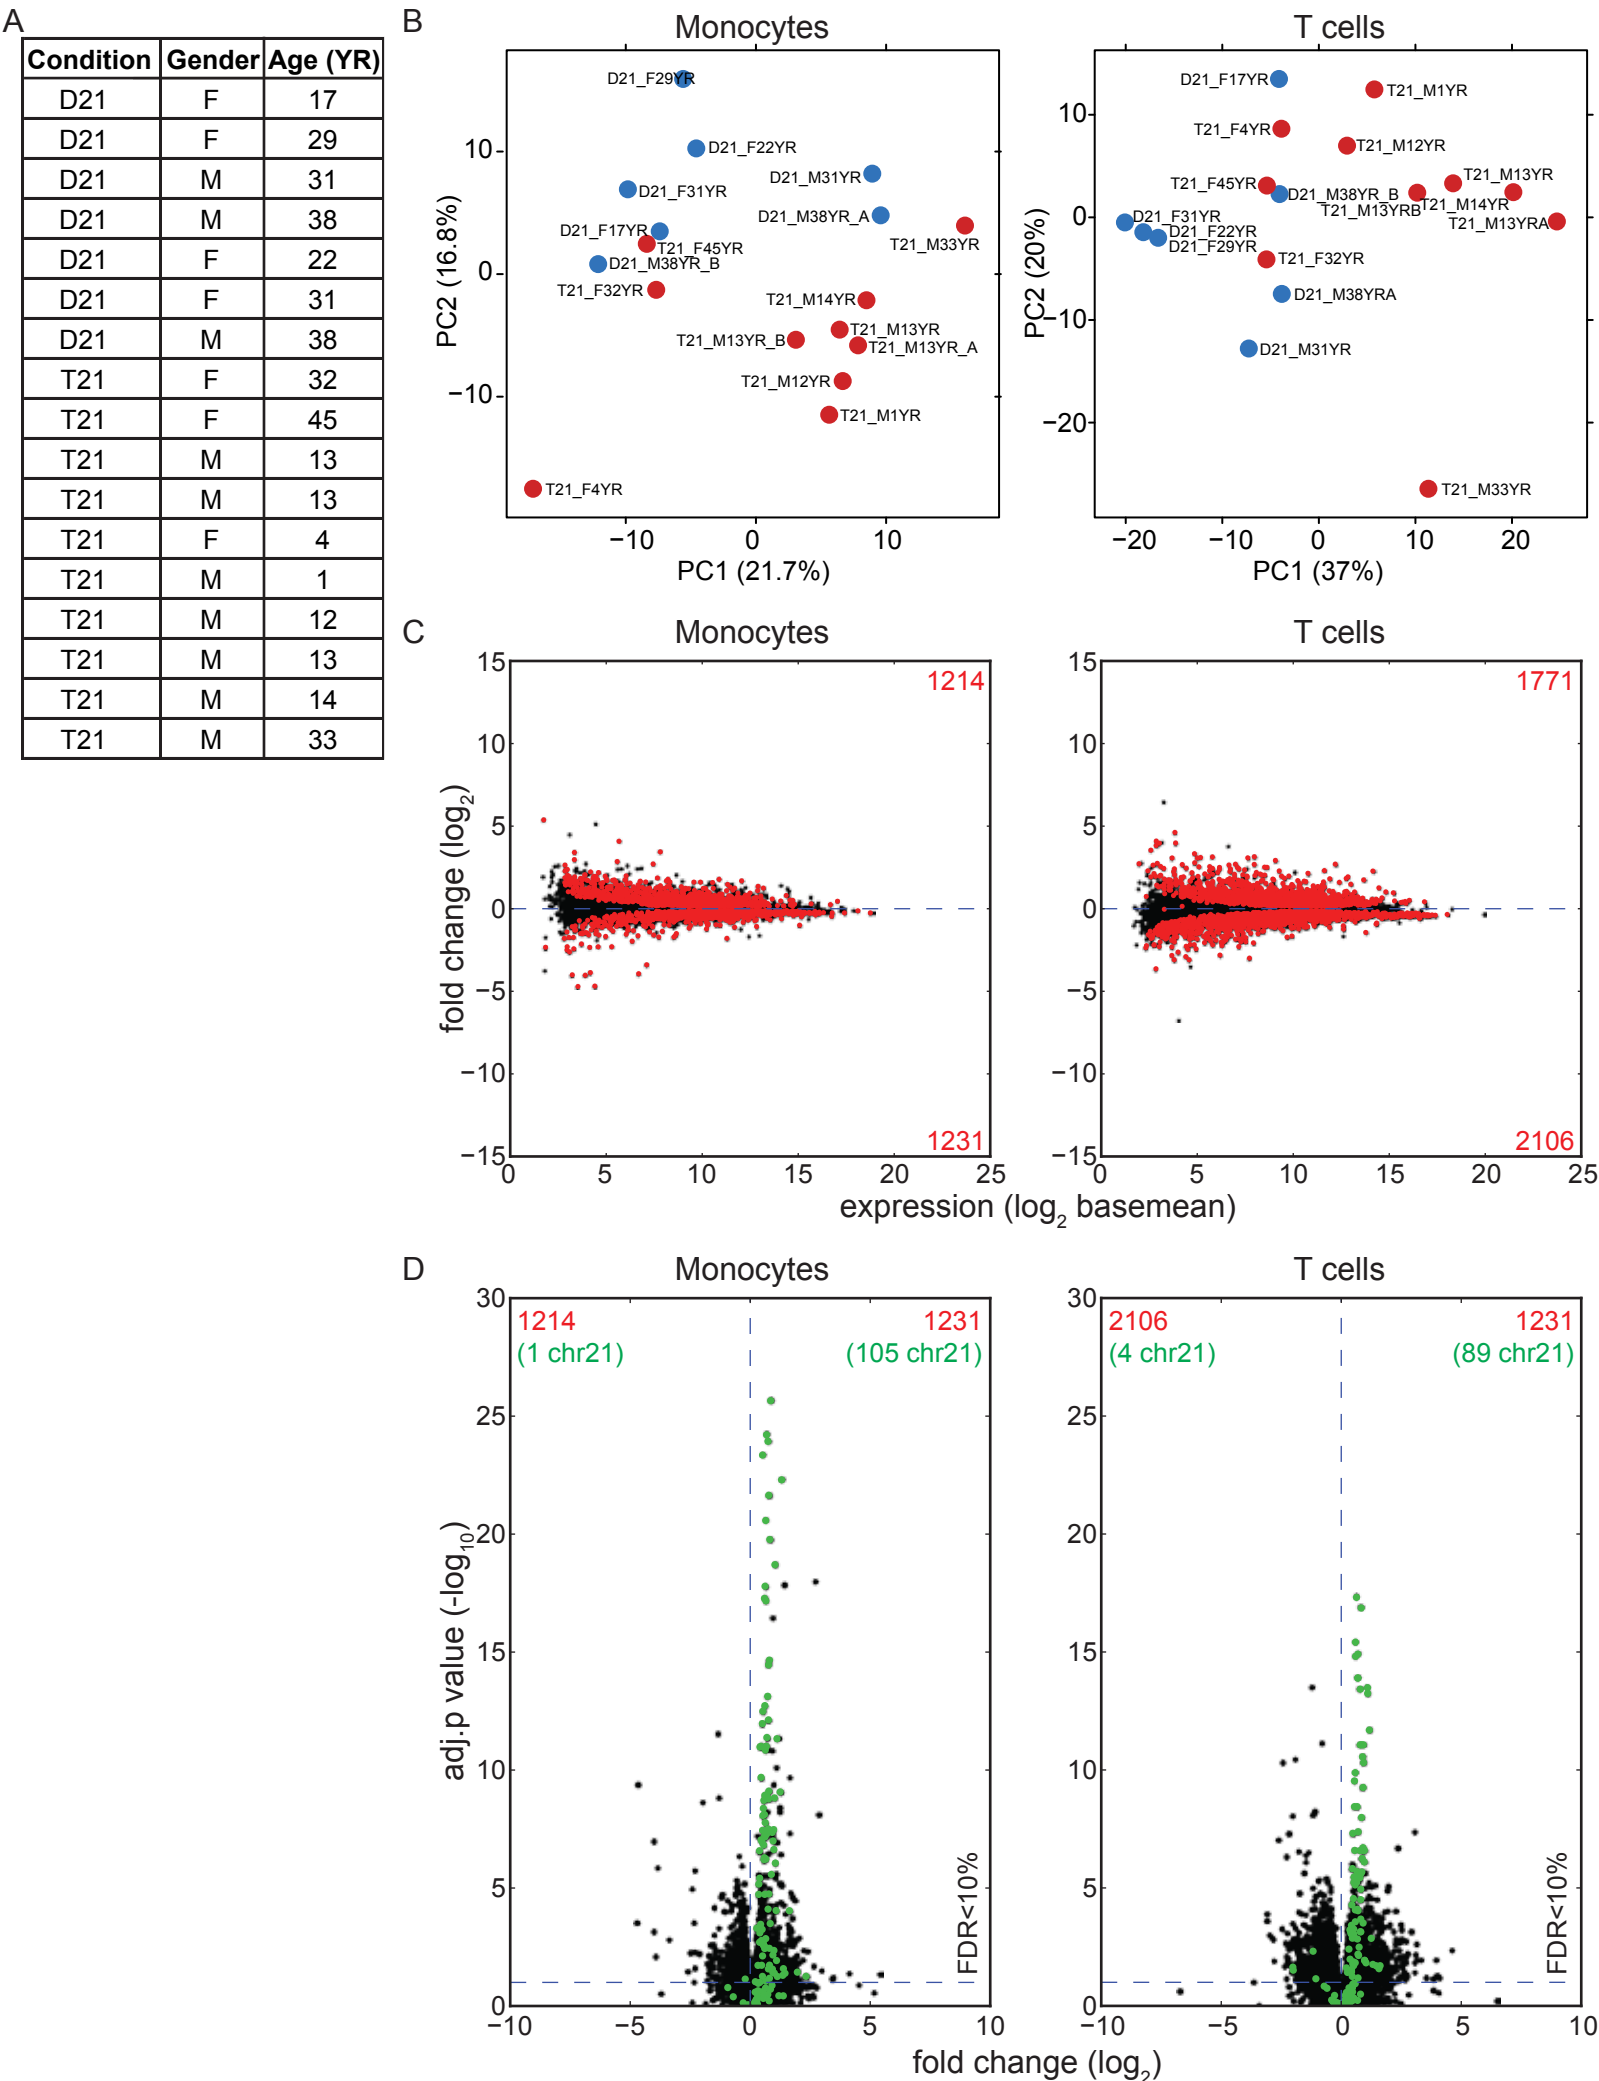

**Figure 6 – figure supplement 1. Effects of T21 on the transcriptome of circulating monocytes and T cells from individuals with T21 and typical controls.** (A) Description of samples from individuals with T21 and typical controls used in this study. (B) Principal component analysis (PCA) of monocyte and T cell RNA-seq samples. (C) MA plots displaying the results of RNA-seq analysis for monocytes and T cells. Differentially expressed genes (DEGs), as defined by DEseq2 (FDR<10%), are labeled in red. (D) Volcano plots of data from monocytes and T cells highlight changes in chr21 gene expression (green) consistent with increased gene dosage effects.
