# Supplementary material for: Trisomy 21 consistently activates the interferon response
Source: eLife journal article supplement (doi:10.7554/elife.16220), 2016-07-29
Supplement: supp [file elife-16220-supp-v1.zip]

## B Cells

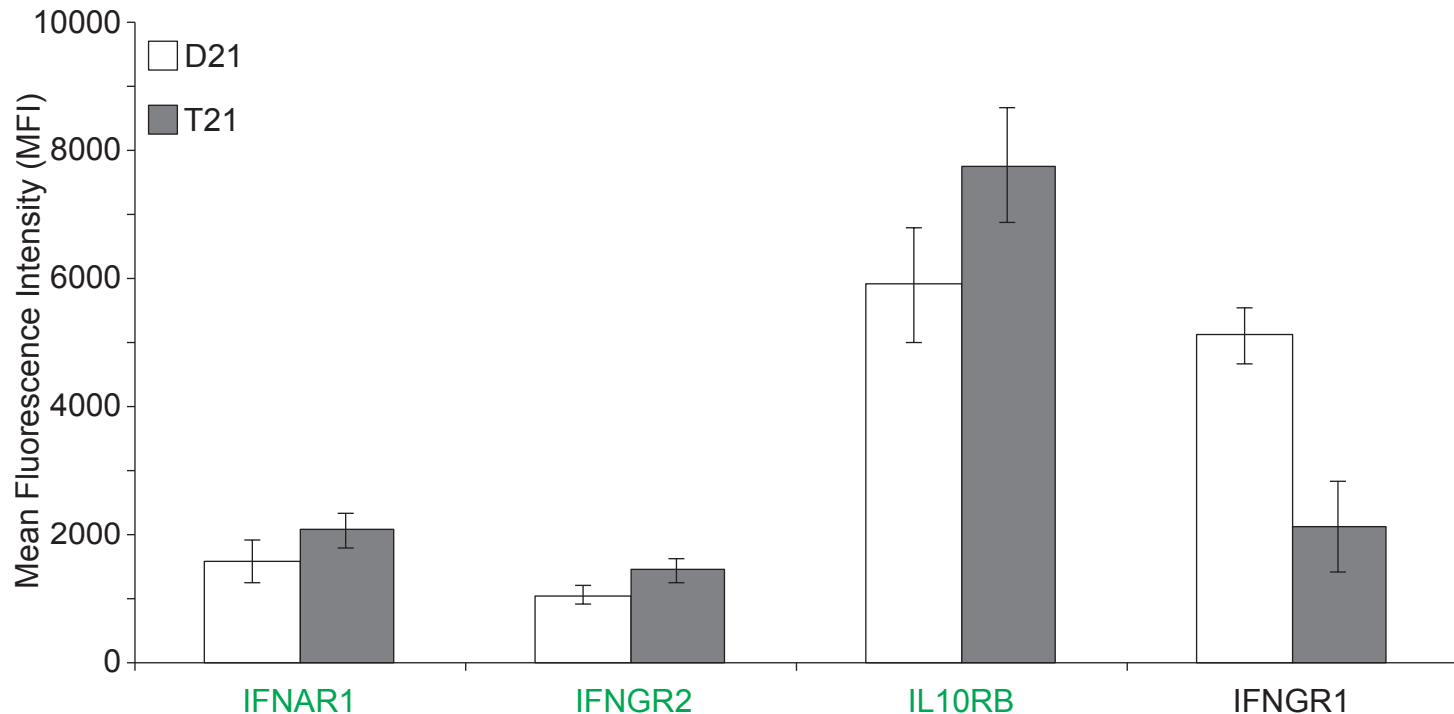

**Figure 6 – figure supplement 2. Surface expression of IFN receptors is increased in B cells from individuals with T21.** Flow cytometric analysis of surface expression of three chr21-encoded IFN receptors (in green) and one encoded on another chromosome (IFNGR1) in B cells isolated from the same individuals as monocytes and T cells used in Figure 6.
