# Supplementary material for: Trisomy 21 consistently activates the interferon response
Source: eLife journal article supplement (doi:10.7554/elife.16220), 2016-07-29
Supplement: supp [file elife-16220-supp-v1.zip]

A

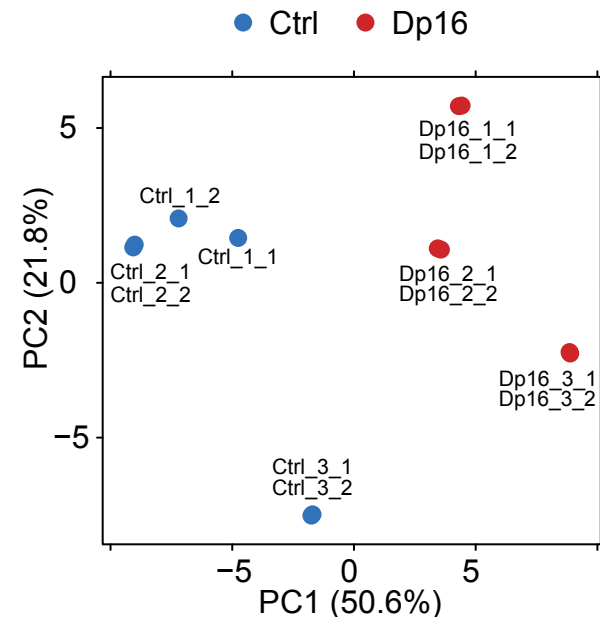

B

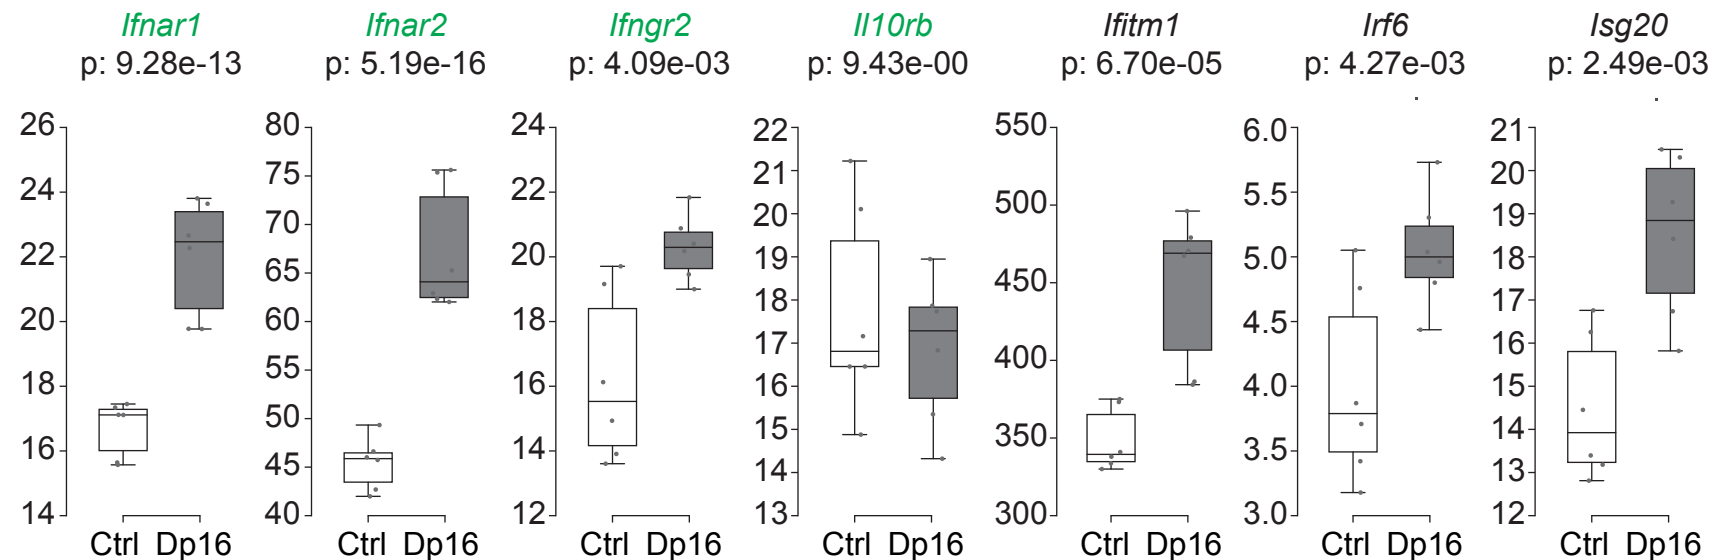

**Figure 5 – figure supplement 3. Components of the IFN response are activated in a mouse model of Down syndrome.** (A) Principal component analysis (PCA) of RNA-seq samples produced from lineage negative, Sca1 positive, c-kit positive (LSK) cells from Dp16 mice and matched littermate controls. (B) Box and whisker plots of RNA expression for the four IFN receptor subunits encoded on chr16 (green) and representative IFN-related genes from Dp16 LSK cells. mRNA expression values are displayed in reads per kilobase per million (RPKM). Benjamini-Hochberg adjusted p-values were calculated using DESeq2.
