# Supplementary material for: Trisomy 21 consistently activates the interferon response
Source: eLife journal article supplement (doi:10.7554/elife.16220), 2016-07-29
Supplement: supp [file elife-16220-supp-v1.zip]

## EIF2 Signaling (Monocytes)

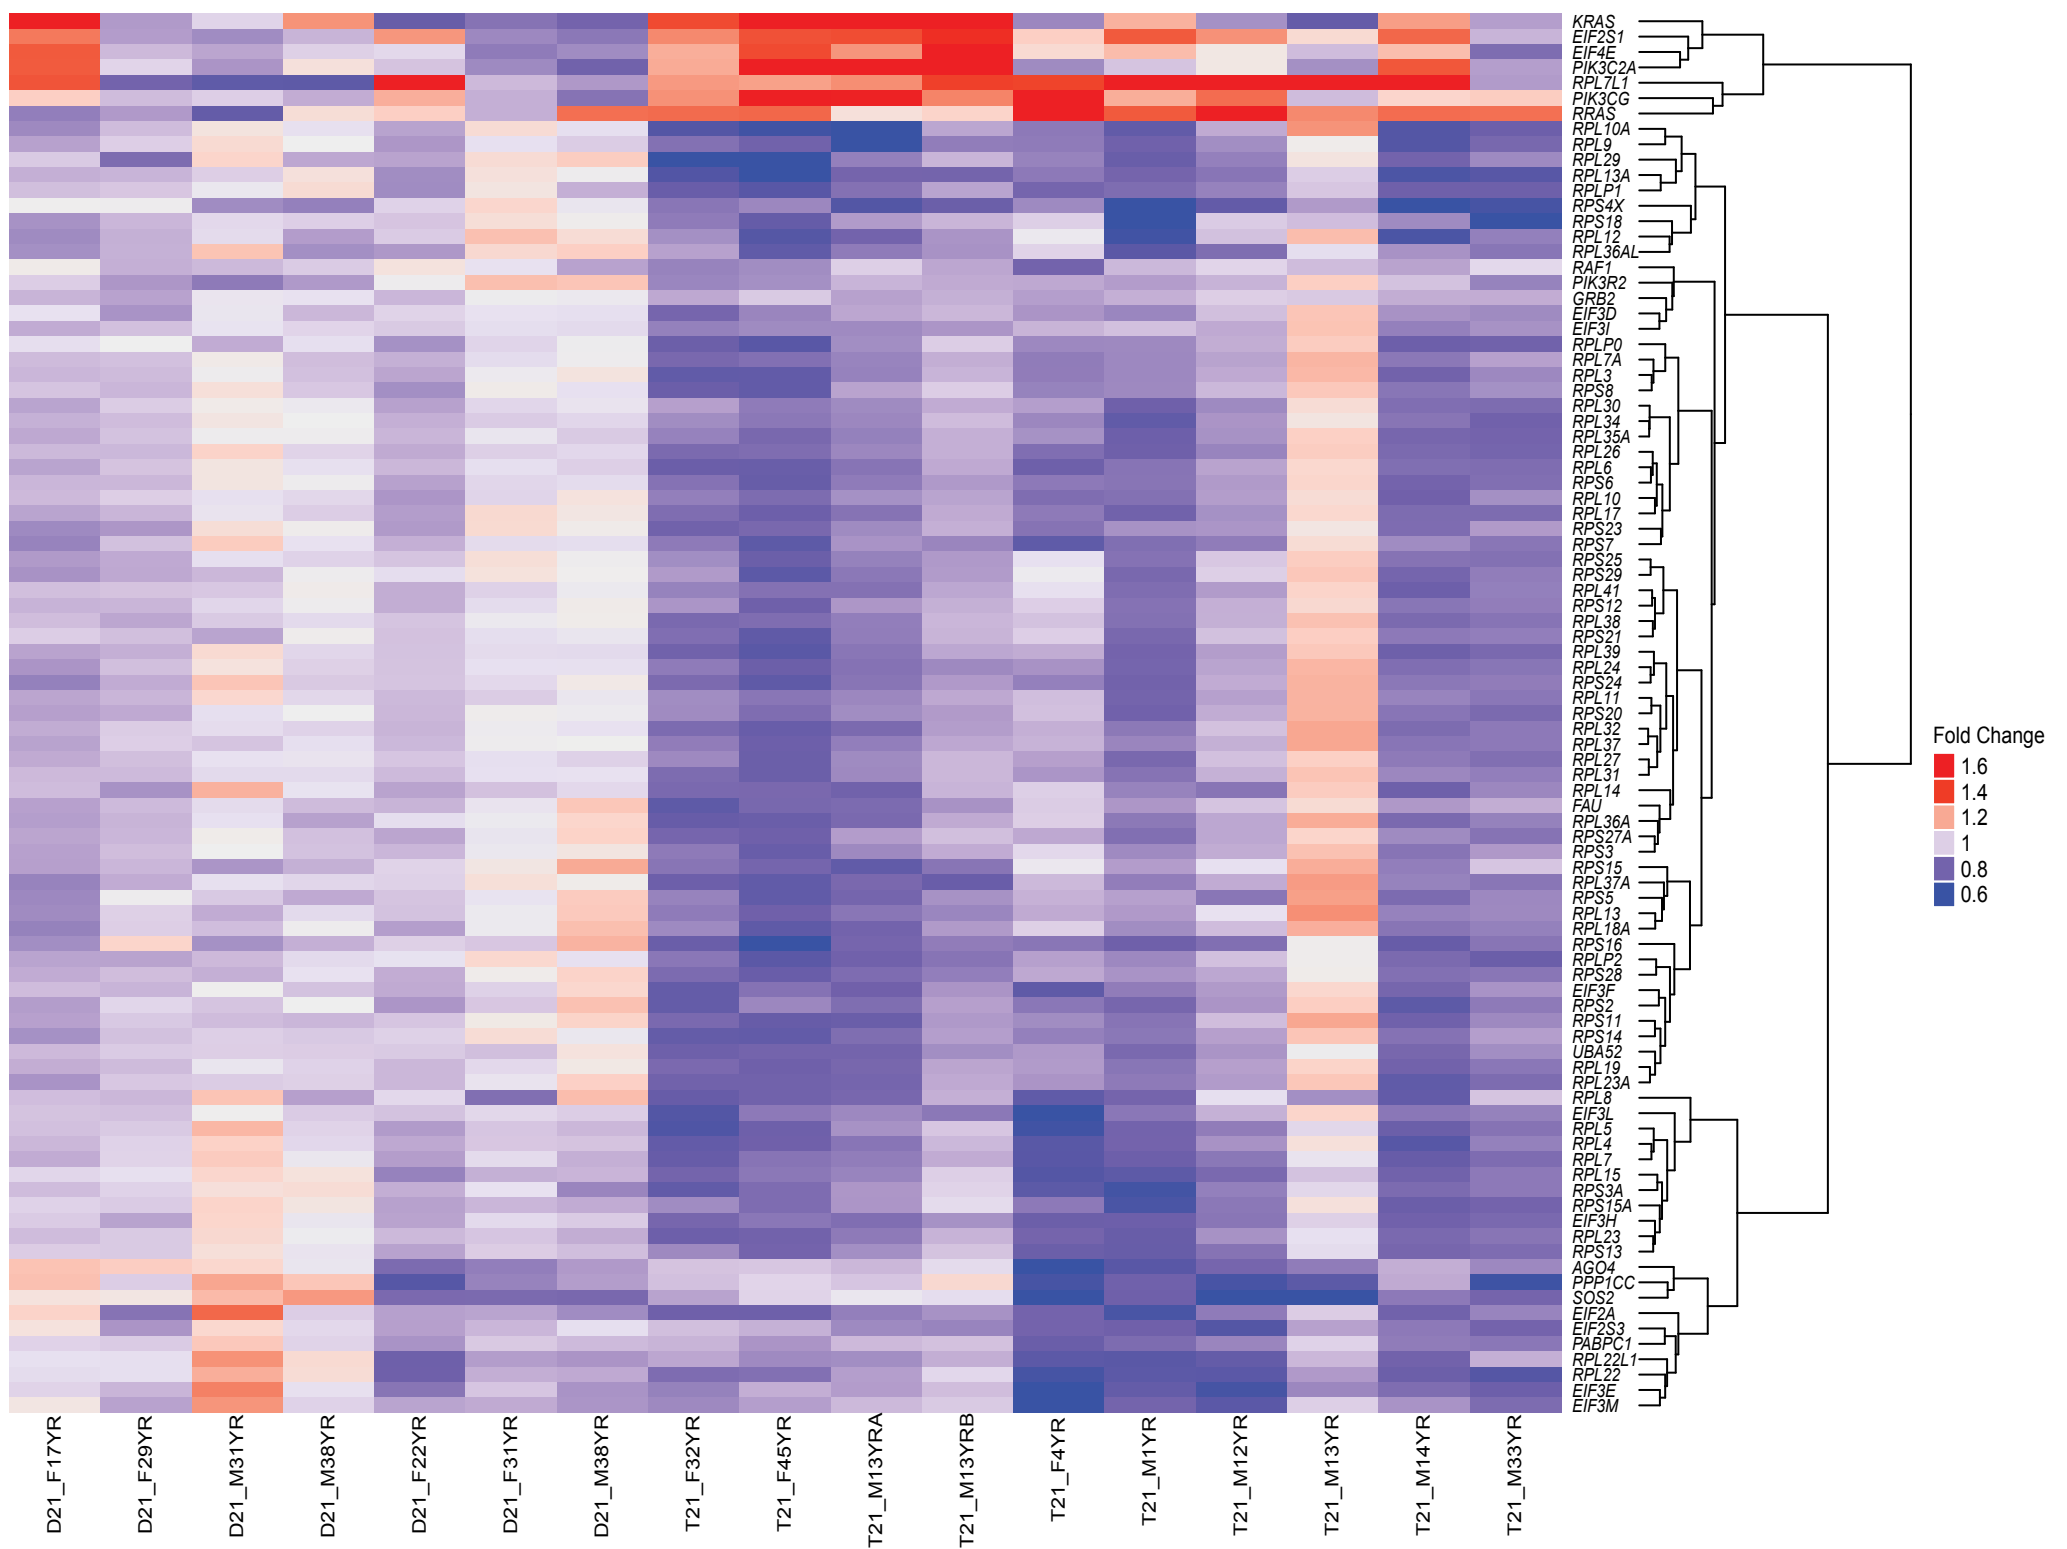

**Figure 7 – figure supplement 2. The EIF2 Signaling pathway is downregulated by T21.** A heatmap demonstrates downregulation of numerous components of the translational machinery associated with EIF2 Signaling in monocytes from individuals with T21. Data presented are the fold change of the RPKM of each sample relative to the mean RPKM of all D21 individuals.
