# Supplementary material for: Trisomy 21 consistently activates the interferon response
Source: eLife. 2016 Jul 29;5:e16220. doi: 10.7554/eLife.16220 (PMC5012864; doi:10.7554/eLife.16220)
Supplement: Supplementary file 2. — DESeq2 analysis of kinome shRNA screens in T21 versus D21 fibroblasts. Columns include: (A) TRC number (B) shRNA targeting location (C) Chromosome, (D) Genomic coordinates, (E) Gene strand, (F) Gene name, (G) RefSeq ID (H) basemean (average read count across all samples), (I) basemeanD21 (average read count across all D21 samples), (J) basemeanT21 (average read count across all T21 samples), (K) foldChange (basemeanT21/basemeanD21), (L) log2FoldChange, (M) foldChange_adj (DESeq2 adjusted fold change), (N) log2FoldChange_adj, (O) pval (p-value), (P) padj (Benjamini-Hochberg adjusted p-value). DOI: http://dx.doi.org/10.7554/eLife.16220.025 [file elife-16220-supp2.xlsx]

## Sheet: shRNA Kinome Screen
shRNAs		Chromosomal Position			Target ID		DESeq2 Values			Untransformed Fold Changes		DESeq2 Adjusted Fold Changes		DESeq2 p-values
TRCN	shRNA Loc	Chr	Genomic Loc	Strand	Gene	RefSeq	baseMean	baseMeanD21	baseMeanT21	foldChange	log2FoldChange	foldChange_adj	log2FoldChange_adj	pval	padj
TRCN0000001942	CDS	chr2	69685127:69870977	-	AAK1	NM_014911	675.765	582.362	775.006	1.3308	0.412292	1.30895	0.388413	0.00149231	0.0157265
TRCN0000001946	CDS	chr2	69685127:69870977	-	AAK1	NM_014911	1348.22	1483.74	1204.23	0.811617	-0.301129	0.823065	-0.280922	0.0117892	0.0405473
TRCN0000001944	3UTR	chr2	69685127:69870977	-	AAK1	NM_014911	914.018	820.376	1013.51	1.23542	0.305006	1.25318	0.325598	0.00656954	0.0295539
TRCN0000001945	CDS	chr2	69685127:69870977	-	AAK1	NM_014911	504.507	493.103	516.625	1.0477	0.0672274	1.05973	0.0837031	0.322724	0.420506
TRCN0000001943	CDS	chr2	69685127:69870977	-	AAK1	NM_014911	1489.12	1558.62	1415.28	0.908031	-0.139187	0.917314	-0.124512	0.187096	0.275692
TRCN0000021434	3UTR	chr17	79091096:79139872	-	AATK	XM_375495	1186.38	1115.73	1261.44	1.1306	0.177083	1.13983	0.188817	0.0106442	0.0380457
TRCN0000021435	CDS	chr17	79091096:79139872	-	AATK	XM_375495	1036.16	1015.87	1057.72	1.04119	0.0582398	1.06179	0.0864966	0.347413	0.444582
TRCN0000021437	CDS	chr17	79091096:79139872	-	AATK	XM_375495	3294.8	3509.72	3066.46	0.873705	-0.194782	0.893002	-0.163264	0.133322	0.212495
TRCN0000021436	CDS	chr17	79091096:79139872	-	AATK	XM_375495	599.234	618.503	578.761	0.935746	-0.0958118	0.929337	-0.105726	0.294192	0.391648
TRCN0000039900	CDS	chr9	133589268:133763062	+	ABL1	NM_005157	233.905	198.997	270.995	1.3618	0.44552	1.27302	0.348258	0.0148591	0.0461908
TRCN0000039898	CDS	chr9	133589268:133763062	+	ABL1	NM_005157	2339.69	2325.75	2354.5	1.01236	0.0177249	1.0158	0.022618	0.78165	0.840056
TRCN0000039902	CDS	chr9	133589268:133763062	+	ABL1	NM_005157	3637.4	3916.38	3340.98	0.853079	-0.229248	0.864823	-0.209522	0.00901327	0.0345585
TRCN0000039899	CDS	chr9	133589268:133763062	+	ABL1	NM_005157	2449.23	2570.3	2320.6	0.902849	-0.147443	0.903853	-0.145839	0.0127519	0.0421564
TRCN0000039901	CDS	chr9	133589268:133763062	+	ABL1	NM_005157	1134.89	1177.92	1089.18	0.924663	-0.113001	0.932813	-0.10034	0.267955	0.365626
TRCN0000010289	3UTR	chr9	133589268:133763062	+	ABL1	NM_007313	2058.39	2087.44	2027.53	0.971302	-0.0420088	0.970049	-0.0438709	0.572051	0.661125
TRCN0000002030	CDS	chr1	179068462:179198819	-	ABL2	NM_005158	2991.61	2953.31	3032.29	1.02674	0.0380752	1.03337	0.0473558	0.444322	0.540304
TRCN0000002032	CDS	chr1	179068462:179198819	-	ABL2	NM_005158	1244.45	1233.76	1255.81	1.01787	0.0255523	1.01583	0.0226655	0.760817	0.823556
TRCN0000002029	CDS	chr1	179068462:179198819	-	ABL2	NM_005158	101.987	111.447	91.9357	0.824925	-0.277665	0.891822	-0.165172	0.289735	0.386454
TRCN0000002033	CDS	chr1	179068462:179198819	-	ABL2	NM_005158	47.2461	47.495	46.9817	0.989191	-0.0156784	0.959724	-0.0593091	0.666649	0.745516
TRCN0000000443	CDS	chr2	158592958:158732374	-	ACVR1	NM_001105	234.563	199.691	271.615	1.36018	0.443797	1.31666	0.396887	0.00404663	0.0230288
TRCN0000000442	CDS	chr2	158592958:158732374	-	ACVR1	NM_001105	4424.14	4840.32	3981.96	0.822664	-0.281624	0.840851	-0.250078	0.0179644	0.0516262
TRCN0000000445	CDS	chr2	158592958:158732374	-	ACVR1	NM_001105	1728.98	1482.4	1990.97	1.34307	0.425537	1.29776	0.376021	0.0093408	0.0352358
TRCN0000000441	3UTR	chr2	158592958:158732374	-	ACVR1	NM_001105	1942.7	1920	1966.81	1.02438	0.0347523	1.06302	0.0881627	0.286917	0.384325
TRCN0000000444	CDS	chr2	158592958:158732374	-	ACVR1	NM_001105	2345.64	2496.11	2185.76	0.875665	-0.191549	0.900024	-0.151965	0.0638519	0.122802
TRCN0000001813	CDS	chr12	52345451:52390863	+	ACVR1B	NM_020328	3245.33	3049.53	3453.37	1.13243	0.179419	1.16357	0.218558	0.000594887	0.0116878
TRCN0000001811	CDS	chr12	52345451:52390863	+	ACVR1B	NM_020328	2877.87	2722.82	3042.61	1.11745	0.160208	1.11604	0.158388	0.0177157	0.0512051
TRCN0000010152	CDS	chr12	52345451:52390863	+	ACVR1B	NM_004302	3300.38	3131.71	3479.6	1.11109	0.15197	1.14123	0.190595	0.0241133	0.0625541
TRCN0000001814	CDS	chr12	52345451:52390863	+	ACVR1B	NM_020328	3702.97	3645.43	3764.11	1.03256	0.0462187	1.05417	0.0761076	0.0759473	0.139312
TRCN0000001812	CDS	chr12	52345451:52390863	+	ACVR1B	NM_020328	6174.72	6581.41	5742.61	0.872551	-0.196688	0.879303	-0.185568	0.00541307	0.0264151
TRCN0000010159	CDS	chr12	52345451:52390863	+	ACVR1B	NM_004302	3349.04	3217.9	3488.38	1.08405	0.116437	1.09988	0.13735	0.0783916	0.142989
TRCN0000010151	CDS	chr12	52345451:52390863	+	ACVR1B	NM_004302	18767.5	20010.5	17446.8	0.871883	-0.197793	0.868544	-0.203329	0.0130706	0.0425297
TRCN0000001810	CDS	chr12	52345451:52390863	+	ACVR1B	NM_020328	22040.1	23289.6	20712.5	0.889344	-0.169187	0.88018	-0.18413	0.0228349	0.0603177
TRCN0000001825	CDS	chr2	158383279:158485399	-	ACVR1C	NM_145259	3138.94	3273.63	2995.82	0.915138	-0.127938	0.906436	-0.141723	0.109355	0.182419
TRCN0000001828	CDS	chr2	158383279:158485399	-	ACVR1C	NM_145259	603.399	523.904	687.862	1.31296	0.392818	1.29811	0.376412	0.00509061	0.0256304
TRCN0000001824	3UTR	chr2	158383279:158485399	-	ACVR1C	NM_145259	530.769	485.153	579.235	1.19392	0.255709	1.2308	0.299602	0.0276746	0.0681529
TRCN0000001827	CDS	chr2	158383279:158485399	-	ACVR1C	NM_145259	1734.36	1683	1788.93	1.06294	0.0880584	1.0478	0.0673577	0.430356	0.52673
TRCN0000000553	CDS	chr2	148602086:148688396	+	ACVR2A	NM_001616	1861.78	2116.89	1590.73	0.751444	-0.412262	0.775778	-0.366284	0.000653688	0.0120787
TRCN0000000556	CDS	chr2	148602086:148688396	+	ACVR2A	NM_001616	1389.29	1486.78	1285.7	0.864757	-0.209634	0.859462	-0.218495	0.0258673	0.0653422
TRCN0000000554	CDS	chr2	148602086:148688396	+	ACVR2A	NM_001616	1627.39	1665.36	1587.05	0.952977	-0.0694863	0.953904	-0.0680845	0.329098	0.426409
TRCN0000000552	3UTR	chr2	148602086:148688396	+	ACVR2A	NM_001616	2496.8	2407.41	2591.79	1.07659	0.106465	1.0867	0.11995	0.172819	0.259358
TRCN0000000555	CDS	chr2	148602086:148688396	+	ACVR2A	NM_001616	3826.78	3801.98	3853.14	1.01346	0.0192839	1.00856	0.0122988	0.804529	0.857593
TRCN0000000446	CDS	chr3	38495790:38534633	+	ACVR2B	NM_001106	2721.71	2946.95	2482.4	0.842362	-0.247487	0.828897	-0.270735	0.0109531	0.0388726
TRCN0000000447	CDS	chr3	38495790:38534633	+	ACVR2B	NM_001106	327.994	289.14	369.276	1.27715	0.352932	1.29559	0.373608	0.00512437	0.0256304
TRCN0000000449	CDS	chr3	38495790:38534633	+	ACVR2B	NM_001106	725.066	683.719	768.997	1.12473	0.169575	1.12899	0.175038	0.141328	0.222321
TRCN0000000450	CDS	chr3	38495790:38534633	+	ACVR2B	NM_001106	1042.26	1011.74	1074.69	1.06222	0.0870793	1.05236	0.0736218	0.47315	0.566532
TRCN0000000354	CDS	chr12	52301202:52317145	+	ACVRL1	NM_000020	1276.07	1424.77	1118.07	0.784733	-0.349726	0.796293	-0.328629	0.0019076	0.0168654
TRCN0000000356	CDS	chr12	52301202:52317145	+	ACVRL1	NM_000020	2131.83	2255.77	2000.16	0.886686	-0.173504	0.895152	-0.159795	0.0707965	0.133009
TRCN0000000357	CDS	chr12	52301202:52317145	+	ACVRL1	NM_000020	1717.38	1751.2	1681.46	0.960174	-0.0586319	0.955359	-0.0658857	0.327669	0.425291
TRCN0000000355	CDS	chr12	52301202:52317145	+	ACVRL1	NM_000020	2180.34	2126.59	2237.45	1.05213	0.0733116	1.03536	0.050135	0.553006	0.645184
TRCN0000021502	CDS	chr14	78266426:78400297	+	ADCK1	NM_020421	3384.3	3090.86	3696.09	1.19581	0.257991	1.22226	0.289548	0.000926016	0.0132161
TRCN0000021503	CDS	chr14	78266426:78400297	+	ADCK1	NM_020421	4354.76	4125.97	4597.85	1.11437	0.156225	1.11764	0.160457	0.0340748	0.0784896
TRCN0000021499	3UTR	chr14	78266426:78400297	+	ADCK1	NM_020421	1562.11	1497.84	1630.41	1.0885	0.122347	1.10458	0.143502	0.0463606	0.0974545
TRCN0000021500	CDS	chr14	78266426:78400297	+	ADCK1	NM_020421	546.588	518.153	576.799	1.11318	0.15469	1.13036	0.176787	0.207292	0.297432
TRCN0000021501	CDS	chr14	78266426:78400297	+	ADCK1	NM_020421	1423.57	1397.94	1450.8	1.03781	0.0535472	1.04575	0.0645415	0.397278	0.495321
TRCN0000021395	CDS	chr7	140372953:140394908	+	ADCK2	NM_052853	2836.51	3088.79	2568.46	0.831543	-0.266137	0.841835	-0.24839	0.00117049	0.0139428
TRCN0000021397	CDS	chr7	140372953:140394908	+	ADCK2	NM_052853	1344.59	1450.76	1231.79	0.849069	-0.236046	0.856354	-0.223721	0.0166239	0.0492482
TRCN0000021398	CDS	chr7	140372953:140394908	+	ADCK2	NM_052853	2670.39	2808.12	2524.04	0.898836	-0.153871	0.902927	-0.147319	0.030893	0.0731896
TRCN0000021394	3UTR	chr7	140372953:140394908	+	ADCK2	NM_052853	1321.46	1226.39	1422.48	1.1599	0.213999	1.1842	0.24391	0.00158874	0.0159836
TRCN0000021396	CDS	chr7	140372953:140394908	+	ADCK2	NM_052853	1105.98	1005.49	1212.75	1.20613	0.270385	1.23304	0.302222	0.00192391	0.0169597
TRCN0000021508	CDS	chr1	227127938:227175246	+	ADCK3	NM_020247	3959.28	4226.82	3675.02	0.869453	-0.201821	0.87907	-0.18595	0.0280789	0.068678
TRCN0000021505	CDS	chr1	227127938:227175246	+	ADCK3	NM_020247	4217.29	4292.47	4137.42	0.96388	-0.0530745	0.982641	-0.0252637	0.634637	0.716918
TRCN0000021504	3UTR	chr1	227127938:227175246	+	ADCK3	NM_020247	1183.06	1100.39	1270.9	1.15496	0.207843	1.14264	0.192366	0.0434554	0.0937737
TRCN0000021506	CDS	chr1	227127938:227175246	+	ADCK3	NM_020247	1473.16	1446.22	1501.77	1.03841	0.0543725	1.06596	0.0921557	0.156177	0.240015
TRCN0000021507	CDS	chr1	227127938:227175246	+	ADCK3	NM_020247	672.975	657.821	689.076	1.04751	0.0669667	1.06576	0.0918801	0.378256	0.475504
TRCN0000007331	CDS	chr19	41197434:41222790	-	ADCK4	NM_024876	708.155	725.842	689.363	0.949742	-0.0743921	0.949228	-0.0751741	0.46377	0.558224
TRCN0000007330	3UTR	chr19	41197434:41222790	-	ADCK4	NM_024876	1522.8	1536.55	1508.19	0.981543	-0.0268772	0.981954	-0.0262732	0.714627	0.786875
TRCN0000007334	CDS	chr19	41197434:41222790	-	ADCK4	NM_024876	1161.25	1065.87	1262.6	1.18457	0.244361	1.15938	0.213352	0.0484315	0.100542
TRCN0000007333	CDS	chr19	41197434:41222790	-	ADCK4	NM_024876	457.229	426.35	490.038	1.14938	0.200856	1.10401	0.142747	0.226829	0.318769
TRCN0000007332	CDS	chr19	41197434:41222790	-	ADCK4	NM_024876	1304.1	1274.1	1335.98	1.04857	0.0684271	1.04555	0.0642603	0.397892	0.49588
TRCN0000021480	CDS	chr8	145597704:145618453	+	ADCK5	NM_174922	2187.59	2398.54	1963.45	0.818604	-0.288762	0.832571	-0.264355	0.00899672	0.0345391
TRCN0000021483	CDS	chr8	145597704:145618453	+	ADCK5	NM_174922	1689.99	1598.07	1787.67	1.11864	0.161748	1.14219	0.191798	0.0163804	0.0489577
TRCN0000021482	CDS	chr8	145597704:145618453	+	ADCK5	NM_174922	494.557	459.662	531.634	1.15658	0.20986	1.20636	0.270664	0.0397025	0.0879482
TRCN0000021481	CDS	chr8	145597704:145618453	+	ADCK5	NM_174922	493.199	464.612	523.572	1.1269	0.17236	1.12941	0.175564	0.0877483	0.154614
TRCN0000010080	CDS	chr10	75910943:76469061	+	ADK	NM_001123	8583.73	9099.37	8035.86	0.883122	-0.179315	0.883383	-0.178889	0.0380865	0.0850579
TRCN0000010077	CDS	chr10	75910943:76469061	+	ADK	NM_001123	2355.71	2500.02	2202.38	0.880942	-0.182881	0.897548	-0.15594	0.127203	0.204916
TRCN0000010076	CDS	chr10	75910943:76469061	+	ADK	NM_001123	1840.11	1904.22	1771.99	0.930558	-0.103832	0.937074	-0.0937658	0.212894	0.303586
TRCN0000010079	CDS	chr10	75910943:76469061	+	ADK	NM_001123	2385.31	2410.7	2358.33	0.978276	-0.0316865	0.980173	-0.0288921	0.638937	0.720963
TRCN0000010078	CDS	chr10	75910943:76469061	+	ADK	NM_001123	4721.22	4767.97	4671.54	0.979775	-0.0294782	0.990432	-0.0138702	0.732472	0.800658
TRCN0000052587	CDS	chr15	73043708:73076126	-	ADPGK	NM_031284	1501.2	1607.64	1388.11	0.863443	-0.211827	0.869091	-0.202421	0.0233352	0.061209
TRCN0000052585	CDS	chr15	73043708:73076126	-	ADPGK	NM_031284	979.096	1007.99	948.398	0.940882	-0.0879145	0.948656	-0.0760431	0.364677	0.462345
TRCN0000052583	CDS	chr15	73043708:73076126	-	ADPGK	NM_031284	361.402	309.709	416.327	1.34425	0.426804	1.33355	0.415276	0.000409284	0.0106061
TRCN0000052586	CDS	chr15	73043708:73076126	-	ADPGK	NM_031284	475.341	414.215	540.287	1.30437	0.383348	1.28124	0.357541	0.00831403	0.0333226
TRCN0000052584	CDS	chr15	73043708:73076126	-	ADPGK	NM_031284	762.694	732.37	794.913	1.0854	0.118224	1.08799	0.121661	0.194872	0.282987
TRCN0000000560	CDS	chr11	67033905:67054029	+	ADRBK1	NM_001619	1298.58	1313.98	1282.22	0.975827	-0.0353021	0.983884	-0.0234397	0.75428	0.817953
TRCN0000000559	CDS	chr11	67033905:67054029	+	ADRBK1	NM_001619	559.505	567.044	551.494	0.972577	-0.0401161	0.974876	-0.0367095	0.776825	0.836313
TRCN0000000557	3UTR	chr11	67033905:67054029	+	ADRBK1	NM_001619	880.584	754.266	1014.8	1.34541	0.428044	1.31942	0.399899	0.000745501	0.0127328
TRCN0000000558	CDS	chr11	67033905:67054029	+	ADRBK1	NM_001619	797.35	718.408	881.225	1.22664	0.294707	1.2116	0.276909	0.0182248	0.0521729
TRCN0000000561	CDS	chr11	67033905:67054029	+	ADRBK1	NM_001619	2460.23	2371.71	2554.28	1.07698	0.10699	1.07363	0.102499	0.0825311	0.147936
TRCN0000002036	CDS	chr22	25960861:26125258	+	ADRBK2	NM_005160	1173.17	1291.02	1047.96	0.811731	-0.300927	0.836606	-0.25738	0.0150051	0.0465002
TRCN0000002034	CDS	chr22	25960861:26125258	+	ADRBK2	NM_005160	301.088	301.992	300.126	0.993821	-0.00894253	0.971144	-0.0422429	0.785401	0.842582
TRCN0000002037	CDS	chr22	25960861:26125258	+	ADRBK2	NM_005160	1412.6	1278.13	1555.47	1.21699	0.283318	1.23729	0.307185	0.000762047	0.0127914
TRCN0000002035	CDS	chr22	25960861:26125258	+	ADRBK2	NM_005160	2656.79	2531.97	2789.42	1.10168	0.139708	1.11262	0.153965	0.0120203	0.0409772
TRCN0000006018	CDS	chr9	130628759:130640022	-	AK1	NM_000476	2262.09	2470.04	2041.15	0.826363	-0.275153	0.828033	-0.272241	6.95932e-05	0.00686112
TRCN0000006021	CDS	chr9	130628759:130640022	-	AK1	NM_000476	3169.25	3091.78	3251.56	1.05168	0.0726976	1.05077	0.0714528	0.254397	0.350467
TRCN0000006020	CDS	chr9	130628759:130640022	-	AK1	NM_000476	1203.55	1179.82	1228.75	1.04147	0.0586275	1.04814	0.0678279	0.489019	0.582868
TRCN0000006019	CDS	chr9	130628759:130640022	-	AK1	NM_000476	1765.68	1759.64	1772.09	1.00707	0.0101666	1.00223	0.00321306	0.965267	0.977625
TRCN0000006026	CDS	chr1	33473541:33502512	-	AK2	NM_001625	1178.64	1211.15	1144.09	0.944632	-0.0821764	0.931885	-0.101775	0.27908	0.376212
TRCN0000006025	CDS	chr1	33473541:33502512	-	AK2	NM_001625	1437.96	1440.91	1434.83	0.995777	-0.0061056	0.977872	-0.0322824	0.735285	0.802003
TRCN0000006022	3UTR	chr1	33473541:33502512	-	AK2	NM_001625	877.919	851.192	906.317	1.06476	0.0905318	1.07991	0.110906	0.244254	0.339292
TRCN0000006024	CDS	chr1	33473541:33502512	-	AK2	NM_001625	945.232	920.823	971.167	1.05467	0.0767953	1.06189	0.0866316	0.276866	0.374486
TRCN0000006028	CDS	chr9	4709557:4742043	-	AK3	NM_016282	1751.56	1818.84	1680.08	0.923708	-0.114492	0.921494	-0.117953	0.0712896	0.133518
TRCN0000006027	3UTR	chr9	4709557:4742043	-	AK3	NM_016282	3891.49	4105.11	3664.52	0.892673	-0.163797	0.900669	-0.150931	0.0723989	0.134506
TRCN0000006031	CDS	chr9	4709557:4742043	-	AK3	NM_016282	2919.74	2746.81	3103.48	1.12985	0.176134	1.14024	0.189341	0.000498187	0.0113451
TRCN0000006030	CDS	chr9	4709557:4742043	-	AK3	NM_016282	2811.36	2526.76	3113.74	1.2323	0.301356	1.24733	0.31884	0.00328571	0.0212863
TRCN0000078639	CDS	NA	NA:NA	NA	AK3L2	XM_370688	669.067	594.149	748.668	1.26007	0.333501	1.25883	0.332079	0.000244088	0.00977013
TRCN0000078642	CDS	NA	NA:NA	NA	AK3L2	XM_370688	701.676	678.269	726.545	1.07118	0.0991952	1.10769	0.147557	0.152613	0.235864
TRCN0000078641	CDS	NA	NA:NA	NA	AK3L2	XM_370688	1377.08	1471.59	1276.66	0.867541	-0.204996	0.899774	-0.152365	0.0720147	0.134124
TRCN0000078638	3UTR	NA	NA:NA	NA	AK3L2	XM_370688	514.149	535.858	491.083	0.916443	-0.125883	0.930164	-0.104443	0.315575	0.414969
TRCN0000078640	CDS	NA	NA:NA	NA	AK3L2	XM_370688	1413.38	1372.21	1457.12	1.06188	0.0866171	1.06363	0.0889952	0.216528	0.307456
TRCN0000037558	CDS	chr1	65613232:65697828	+	AK4	NM_013410	3605.63	4098.73	3081.7	0.751866	-0.411453	0.759177	-0.397493	1.08611e-07	0.000326484
TRCN0000037554	CDS	chr1	65613232:65697828	+	AK4	NM_013410	4678.94	4849.58	4497.63	0.927429	-0.108692	0.913659	-0.130272	0.104289	0.17543
TRCN0000037557	CDS	chr1	65613232:65697828	+	AK4	NM_013410	4018.99	4112.96	3919.14	0.952877	-0.0696388	0.9583	-0.0614509	0.267904	0.365626
TRCN0000037555	CDS	chr1	65613232:65697828	+	AK4	NM_013410	2758.6	2794.12	2720.85	0.973777	-0.0383364	0.982738	-0.0251219	0.72787	0.797949
TRCN0000037556	CDS	chr1	65613232:65697828	+	AK4	NM_013410	2235.94	2262.93	2207.27	0.975405	-0.035927	0.990367	-0.013965	0.819224	0.869565
TRCN0000006034	CDS	chr1	77747662:78025654	+	AK5	NM_012093	4318.49	3987.93	4669.7	1.17096	0.227688	1.17984	0.238588	0.00213931	0.0179308
TRCN0000006033	CDS	chr1	77747662:78025654	+	AK5	NM_012093	1541.59	1418.39	1672.5	1.17915	0.237751	1.21194	0.277322	0.00626494	0.0287518
TRCN0000006032	3UTR	chr1	77747662:78025654	+	AK5	NM_012093	2622.49	2546.06	2703.69	1.06191	0.0866662	1.06585	0.0920008	0.167252	0.253025
TRCN0000006036	CDS	chr1	77747662:78025654	+	AK5	NM_012093	207.496	200.318	215.123	1.07391	0.102871	1.09976	0.137188	0.266744	0.364966
TRCN0000006035	CDS	chr1	77747662:78025654	+	AK5	NM_012093	1970.78	1973.44	1967.96	0.997225	-0.00400919	1.00835	0.0119915	0.876328	0.913398
TRCN0000037824	CDS	chr14	96858448:96955764	+	AK7	NM_152327	1069.47	1037.43	1103.51	1.06369	0.0890831	1.07709	0.10714	0.224476	0.31635
TRCN0000037826	CDS	chr14	96858448:96955764	+	AK7	NM_152327	635.242	715.463	550.006	0.768742	-0.379428	0.828152	-0.272032	0.0346647	0.0793013
TRCN0000037825	CDS	chr14	96858448:96955764	+	AK7	NM_152327	1953.88	2051.71	1849.93	0.901657	-0.14935	0.905636	-0.142996	0.123918	0.200916
TRCN0000037828	CDS	chr14	96858448:96955764	+	AK7	NM_152327	1120.1	1161.59	1076.03	0.926345	-0.110379	0.919678	-0.120799	0.235652	0.329781
TRCN0000037827	CDS	chr14	96858448:96955764	+	AK7	NM_152327	3383.78	3447.47	3316.1	0.961892	-0.0560538	0.969241	-0.0450729	0.549953	0.642752
TRCN0000039796	CDS	chr14	105235687:105262080	-	AKT1	NM_005163	1537.52	1393.84	1690.18	1.21261	0.278117	1.25825	0.331418	0.00189434	0.0168197
TRCN0000039797	CDS	chr14	105235687:105262080	-	AKT1	NM_005163	1570.97	1477.68	1670.1	1.13021	0.176594	1.14161	0.19107	0.0207071	0.0564843
TRCN0000039794	CDS	chr14	105235687:105262080	-	AKT1	NM_005163	2635.32	2560.95	2714.33	1.05989	0.0839148	1.06113	0.0856013	0.202934	0.292778
TRCN0000039793	3UTR	chr14	105235687:105262080	-	AKT1	NM_005163	987.438	958.441	1018.25	1.0624	0.0873271	1.07908	0.109797	0.212556	0.303248
TRCN0000000566	CDS	chr19	40736224:40791302	-	AKT2	NM_001626	1431.32	1309.85	1560.39	1.19127	0.252505	1.20509	0.269139	0.00721436	0.0305873
TRCN0000000563	CDS	chr19	40736224:40791302	-	AKT2	NM_001626	2476	2285.23	2678.68	1.17217	0.229181	1.15838	0.212115	0.0195798	0.0545477
TRCN0000000564	CDS	chr19	40736224:40791302	-	AKT2	NM_001626	2450.24	2305.89	2603.62	1.12912	0.175194	1.15017	0.201853	0.0394263	0.0875877
TRCN0000039970	CDS	chr19	40736224:40791302	-	AKT2	NM_001626	1601.25	1493.99	1715.21	1.14807	0.199216	1.16736	0.223254	0.0404589	0.0890931
TRCN0000039971	CDS	chr19	40736224:40791302	-	AKT2	NM_001626	1842.24	1749.85	1940.4	1.1089	0.149124	1.10928	0.149617	0.192474	0.280998
TRCN0000000562	CDS	chr19	40736224:40791302	-	AKT2	NM_001626	2249.88	2462.22	2024.28	0.822137	-0.28255	0.845232	-0.242581	0.000495777	0.0113451
TRCN0000000565	CDS	chr19	40736224:40791302	-	AKT2	NM_001626	1527.71	1642.43	1405.81	0.855932	-0.224432	0.853048	-0.229301	0.0250637	0.0640082
TRCN0000039972	CDS	chr19	40736224:40791302	-	AKT2	NM_001626	3854.25	3876.53	3830.58	0.988148	-0.0172014	0.980259	-0.0287655	0.522997	0.616279
TRCN0000039890	CDS	chr1	243651535:244006886	-	AKT3	NM_005465	1736.43	1607.71	1873.18	1.16512	0.220482	1.16776	0.22375	0.00422093	0.0235401
TRCN0000039888	3UTR	chr1	243651535:244006886	-	AKT3	NM_005465	615.402	544.048	691.215	1.2705	0.3454	1.25765	0.330731	0.0239066	0.0621116
TRCN0000039889	CDS	chr1	243651535:244006886	-	AKT3	NM_005465	3107.11	3148.92	3062.69	0.972617	-0.0400563	0.963263	-0.0539989	0.46	0.555102
TRCN0000039892	CDS	chr1	243651535:244006886	-	AKT3	NM_005465	5203.15	5267.99	5134.26	0.974615	-0.0370964	0.975404	-0.0359276	0.563203	0.653915
TRCN0000039891	CDS	chr1	243651535:244006886	-	AKT3	NM_005465	3620.27	3629.23	3610.75	0.994908	-0.00736462	0.982011	-0.0261888	0.708336	0.781666
TRCN0000000786	CDS	chr2	29415640:30144477	-	ALK	NM_004304	2866.76	2700.07	3043.87	1.12733	0.172908	1.1214	0.1653	0.012465	0.0418189
TRCN0000000788	CDS	chr2	29415640:30144477	-	ALK	NM_004304	2016.58	1930.98	2107.53	1.09143	0.126221	1.09104	0.125702	0.0310764	0.073386
TRCN0000000784	3UTR	chr2	29415640:30144477	-	ALK	NM_004304	9753.69	10698.5	8749.89	0.817865	-0.290066	0.822414	-0.282064	6.96957e-05	0.00686112
TRCN0000000787	CDS	chr2	29415640:30144477	-	ALK	NM_004304	14529.9	15354.9	13653.3	0.889178	-0.169456	0.880241	-0.18403	0.0132312	0.0428587
TRCN0000000785	CDS	chr2	29415640:30144477	-	ALK	NM_004304	2129.18	2278.55	1970.47	0.864791	-0.209576	0.863159	-0.212302	0.0202518	0.0557998
TRCN0000021475	CDS	chr4	113218499:113363764	+	ALPK1	NM_025144	2901.16	2795.33	3013.61	1.07809	0.108472	1.10215	0.140314	0.0162943	0.0488341
TRCN0000021474	3UTR	chr4	113218499:113363764	+	ALPK1	NM_025144	958.46	900.572	1019.97	1.13258	0.179608	1.16416	0.219292	0.0601801	0.117088
TRCN0000021478	CDS	chr4	113218499:113363764	+	ALPK1	NM_025144	611.158	571.621	653.166	1.14266	0.192392	1.09272	0.127928	0.216128	0.307032
TRCN0000021477	CDS	chr4	113218499:113363764	+	ALPK1	NM_025144	894.176	878.279	911.066	1.03733	0.0528776	1.03447	0.0488959	0.586598	0.673792
TRCN0000021476	CDS	chr4	113218499:113363764	+	ALPK1	NM_025144	3880.59	3859.89	3902.59	1.01106	0.0158716	1.00947	0.0136041	0.846018	0.889829
TRCN0000021391	CDS	chr18	56148482:56296189	-	ALPK2	NM_052947	835.606	754.428	921.857	1.22193	0.289159	1.25136	0.323501	0.0102813	0.0373708
TRCN0000021389	3UTR	chr18	56148482:56296189	-	ALPK2	NM_052947	964.541	891.772	1041.86	1.1683	0.224413	1.19369	0.255429	0.0199384	0.0552395
TRCN0000021393	CDS	chr18	56148482:56296189	-	ALPK2	NM_052947	1518.81	1501.81	1536.88	1.02335	0.0333009	1.02841	0.0404145	0.537828	0.631775
TRCN0000021392	CDS	chr18	56148482:56296189	-	ALPK2	NM_052947	1908.04	1905.15	1911.1	1.00312	0.00449745	1.00088	0.0012742	0.982833	0.987794
TRCN0000021390	CDS	chr18	56148482:56296189	-	ALPK2	NM_052947	2376.48	2522.77	2221.05	0.880402	-0.183765	0.89843	-0.154522	0.0278732	0.0683975
TRCN0000021524	3UTR	chr15	85359911:85416713	+	ALPK3	NM_020778	822.644	732.121	918.824	1.25502	0.327708	1.26558	0.339798	0.0117545	0.0405153
TRCN0000021527	CDS	chr15	85359911:85416713	+	ALPK3	NM_020778	4951.58	4843.65	5066.27	1.04596	0.0648289	1.06474	0.0905019	0.204407	0.294545
TRCN0000021528	CDS	chr15	85359911:85416713	+	ALPK3	NM_020778	3771.51	4112.09	3409.64	0.829175	-0.270252	0.835885	-0.258624	0.00934637	0.0352358
TRCN0000021525	CDS	chr15	85359911:85416713	+	ALPK3	NM_020778	6839.16	7194.27	6461.86	0.898196	-0.154898	0.891614	-0.165508	0.0242331	0.062689
TRCN0000001956	CDS	chr12	53817639:53825318	+	AMHR2	NM_020547	3157.45	2855.51	3478.26	1.21809	0.284618	1.23693	0.306762	0.000169073	0.00861412
TRCN0000001959	CDS	chr12	53817639:53825318	+	AMHR2	NM_020547	804.003	730.751	881.834	1.20675	0.271128	1.18224	0.241527	0.00840346	0.0333256
TRCN0000001958	CDS	chr12	53817639:53825318	+	AMHR2	NM_020547	1413.1	1551.15	1266.43	0.816445	-0.292573	0.81903	-0.288012	0.00508602	0.0256304
TRCN0000001960	CDS	chr12	53817639:53825318	+	AMHR2	NM_020547	1648.08	1724.53	1566.84	0.90856	-0.138346	0.903674	-0.146126	0.15846	0.242531
TRCN0000001957	CDS	chr12	53817639:53825318	+	AMHR2	NM_020547	941.425	977.275	903.335	0.924341	-0.113502	0.926454	-0.110209	0.333713	0.430964
TRCN0000002302	CDS	chr11	113258513:113271140	+	ANKK1	NM_178510	1314.42	1367.51	1258.01	0.919928	-0.120407	0.919883	-0.120477	0.123483	0.200427
TRCN0000002304	CDS	chr11	113258513:113271140	+	ANKK1	NM_178510	2638.57	2692.15	2581.65	0.958954	-0.0604666	0.947984	-0.0770646	0.243172	0.338258
TRCN0000000570	CDS	chrX	47420499:47431320	+	ARAF	NM_001654	1019.72	921	1124.6	1.22107	0.288141	1.24667	0.318081	0.00457602	0.0246515
TRCN0000000569	CDS	chrX	47420499:47431320	+	ARAF	NM_001654	1292.45	1245.23	1342.62	1.07821	0.108632	1.05865	0.0822191	0.26825	0.365862
TRCN0000000568	CDS	chrX	47420499:47431320	+	ARAF	NM_001654	3370.41	3562.86	3165.93	0.888593	-0.170405	0.892961	-0.163331	0.0678075	0.128356
TRCN0000000571	CDS	chrX	47420499:47431320	+	ARAF	NM_001654	186.555	192.396	180.35	0.937392	-0.0932762	0.930311	-0.104215	0.460283	0.555221
TRCN0000038654	3UTR	chr11	108093559:108239826	+	ATM	NM_000051	2167.41	1986.46	2359.67	1.18787	0.248382	1.19992	0.262944	0.00151875	0.0157265
TRCN0000039951	CDS	chr11	108093559:108239826	+	ATM	NM_000051	2700.93	2509.43	2904.4	1.15739	0.210879	1.17428	0.231772	0.00234552	0.0186586
TRCN0000039948	3UTR	chr11	108093559:108239826	+	ATM	NM_000051	1567.86	1308.25	1843.69	1.40928	0.494955	1.32544	0.406475	0.00835939	0.0333256
TRCN0000039950	CDS	chr11	108093559:108239826	+	ATM	NM_000051	2022.05	1928.93	2120.99	1.09957	0.136939	1.12982	0.176096	0.0292582	0.0707564
TRCN0000038656	CDS	chr11	108093559:108239826	+	ATM	NM_000051	1506.45	1417.99	1600.44	1.12867	0.174625	1.14392	0.19399	0.0433995	0.0937206
TRCN0000039952	CDS	chr11	108093559:108239826	+	ATM	NM_000051	3355.67	3231.97	3487.09	1.07894	0.10961	1.08278	0.114735	0.086012	0.152089
TRCN0000039949	CDS	chr11	108093559:108239826	+	ATM	NM_000051	6409.28	6842.5	5948.99	0.869418	-0.201879	0.868661	-0.203134	0.000393811	0.0105579
TRCN0000038655	CDS	chr11	108093559:108239826	+	ATM	NM_000051	2997.39	3262.74	2715.45	0.83226	-0.264894	0.835672	-0.258992	0.0119669	0.040971
TRCN0000038657	CDS	chr11	108093559:108239826	+	ATM	NM_000051	2839.15	3044.51	2620.96	0.860881	-0.216114	0.851564	-0.231812	0.0129384	0.042229
TRCN0000038658	CDS	chr11	108093559:108239826	+	ATM	NM_000051	2759.62	2768	2750.72	0.993758	-0.00903361	0.982275	-0.0258011	0.726887	0.797517
TRCN0000039617	CDS	chr3	142168077:142297668	-	ATR	NM_001184	4053.64	3586.42	4550.07	1.26869	0.343341	1.26074	0.334271	0.000448668	0.0108766
TRCN0000039613	3UTR	chr3	142168077:142297668	-	ATR	NM_001184	2230.81	2123.51	2344.82	1.10422	0.143021	1.0983	0.13527	0.0577752	0.114183
TRCN0000039616	CDS	chr3	142168077:142297668	-	ATR	NM_001184	3147.1	3023.14	3278.81	1.08457	0.117125	1.09228	0.12734	0.119452	0.195148
TRCN0000039615	CDS	chr3	142168077:142297668	-	ATR	NM_001184	1358.25	1352.87	1363.98	1.00821	0.011799	1.02256	0.0321893	0.660737	0.740191
TRCN0000039614	CDS	chr3	142168077:142297668	-	ATR	NM_001184	16.3001	17.6633	14.8517	0.840824	-0.250124	0.978821	-0.0308828	0.787442	0.844301
TRCN0000000656	CDS	chr20	54944445:54967351	-	AURKA	NM_003600	3285.51	3151.39	3428.02	1.08778	0.121385	1.11179	0.152889	0.0111831	0.0393339
TRCN0000000658	CDS	chr20	54944445:54967351	-	AURKA	NM_003600	1891.47	2035.56	1738.37	0.854003	-0.227686	0.88958	-0.168803	0.0449442	0.0956137
TRCN0000000655	3UTR	chr20	54944445:54967351	-	AURKA	NM_003600	2230.12	2302.89	2152.8	0.934827	-0.0972295	0.938902	-0.0909531	0.165829	0.251377
TRCN0000000657	CDS	chr20	54944445:54967351	-	AURKA	NM_003600	1823.09	1858.27	1785.72	0.960958	-0.057454	0.967022	-0.0483794	0.577924	0.66612
TRCN0000000776	3UTR	chr17	8108049:8113944	-	AURKB	NM_004217	2601.71	2291.06	2931.77	1.27965	0.355754	1.32037	0.400938	0.00623986	0.0286805
TRCN0000000777	CDS	chr17	8108049:8113944	-	AURKB	NM_004217	1049.49	1030.92	1069.22	1.03716	0.0526326	1.06764	0.0944306	0.278252	0.375584
TRCN0000000779	CDS	chr17	8108049:8113944	-	AURKB	NM_004217	2053.63	2029.78	2078.97	1.02424	0.0345475	1.01106	0.0158637	0.805902	0.858144
TRCN0000000778	CDS	chr17	8108049:8113944	-	AURKB	NM_004217	4044.37	4457.8	3605.1	0.808717	-0.306294	0.825519	-0.276627	0.00227213	0.0182414
TRCN0000002333	3UTR	chr19	57742377:57746916	+	AURKC	NM_003160	1291.18	1163.34	1427.02	1.22665	0.294729	1.21767	0.284128	0.040241	0.0888138
TRCN0000002336	CDS	chr19	57742377:57746916	+	AURKC	NM_003160	1188.98	1186.85	1191.25	1.00371	0.00534396	1.00131	0.00189342	0.979631	0.986522
TRCN0000002334	CDS	chr19	57742377:57746916	+	AURKC	NM_003160	4934.53	5106.26	4752.07	0.930636	-0.103711	0.933826	-0.0987746	0.116131	0.190864
TRCN0000000572	3UTR	chr19	41725104:41767672	+	AXL	NM_001699	1156.41	976.94	1347.11	1.37891	0.463523	1.31595	0.396105	0.0083812	0.0333256
TRCN0000000576	CDS	chr19	41725104:41767672	+	AXL	NM_001699	4385.05	4553.11	4206.5	0.923874	-0.114232	0.921531	-0.117895	0.00252448	0.0189741
TRCN0000000574	CDS	chr19	41725104:41767672	+	AXL	NM_001699	3527.53	3711.98	3331.55	0.897514	-0.155994	0.897018	-0.156791	0.00527184	0.0261073
TRCN0000000575	CDS	chr19	41725104:41767672	+	AXL	NM_001699	4654.09	4661.8	4645.91	0.996591	-0.00492721	0.994464	-0.00800949	0.860605	0.901326
TRCN0000010183	CDS	chr16	31119615:31124112	+	BCKDK	NM_005881	1654.86	1511.33	1807.37	1.19588	0.25807	1.21281	0.278358	0.0118127	0.0405815
TRCN0000010195	CDS	chr16	31119615:31124112	+	BCKDK	NM_005881	2889.29	2848.81	2932.3	1.02931	0.041674	1.04346	0.0613774	0.329498	0.426743
TRCN0000010192	CDS	chr16	31119615:31124112	+	BCKDK	NM_005881	2021.48	1998.6	2045.8	1.02362	0.0336763	0.955018	-0.0664	0.542316	0.635804
TRCN0000010196	CDS	chr16	31119615:31124112	+	BCKDK	NM_005881	3030.95	3104.35	2952.96	0.951233	-0.07213	0.957041	-0.0633467	0.382735	0.479376
TRCN0000000791	CDS	chr22	23522552:23660224	+	BCR	NM_004327	2034.11	1953.67	2119.57	1.08492	0.117587	1.09944	0.136768	0.0641542	0.123225
TRCN0000000792	CDS	chr22	23522552:23660224	+	BCR	NM_004327	1671.63	1615.36	1731.42	1.07184	0.100095	1.04459	0.0629371	0.3746	0.471544
TRCN0000000793	CDS	chr22	23522552:23660224	+	BCR	NM_004327	17543.3	19037.7	15955.5	0.838102	-0.254802	0.839188	-0.252934	7.95182e-05	0.00686112
TRCN0000000790	CDS	chr22	23522552:23660224	+	BCR	NM_004327	2220.57	2318.88	2116.13	0.912565	-0.132	0.9169	-0.125164	0.13409	0.213155
TRCN0000010075	CDS	chr8	11351521:11422108	+	BLK	NM_001715	5670.53	6284	5018.72	0.79865	-0.324364	0.821467	-0.283725	0.000429006	0.0107034
TRCN0000010086	CDS	chr8	11351521:11422108	+	BLK	NM_001715	9335.9	10085.7	8539.21	0.846663	-0.24014	0.855762	-0.224719	0.00324976	0.0212365
TRCN0000010087	CDS	chr8	11351521:11422108	+	BLK	NM_001715	4915.37	5092.48	4727.19	0.92827	-0.107384	0.923453	-0.114889	0.0841852	0.149829
TRCN0000010083	CDS	chr8	11351521:11422108	+	BLK	NM_001715	2208.72	2276.23	2136.98	0.938824	-0.0910735	0.941741	-0.086597	0.230646	0.323831
TRCN0000000913	3UTR	chr4	79697532:79833341	+	BMP2K	NM_017593	1346.05	1255.33	1442.44	1.14905	0.200439	1.20083	0.264035	0.000882148	0.0131476
TRCN0000000917	CDS	chr4	79697532:79833341	+	BMP2K	NM_017593	511.166	423.611	604.194	1.42629	0.512269	1.37805	0.462631	0.00238565	0.0186586
TRCN0000000915	CDS	chr4	79697532:79833341	+	BMP2K	NM_017593	534.372	494.825	576.391	1.16484	0.220128	1.18349	0.243049	0.0161436	0.0484792
TRCN0000000914	CDS	chr4	79697532:79833341	+	BMP2K	NM_017593	3021.41	3216.56	2814.06	0.874868	-0.192863	0.884957	-0.17632	0.00107725	0.0134366
TRCN0000000796	CDS	chr10	88516396:88684945	+	BMPR1A	NM_004329	989.513	960.437	1020.41	1.06244	0.0873813	1.06592	0.0921059	0.303177	0.401123
TRCN0000000794	3UTR	chr10	88516396:88684945	+	BMPR1A	NM_004329	1873.4	1968.3	1772.56	0.900553	-0.151117	0.907731	-0.139664	0.0849627	0.150588
TRCN0000000797	CDS	chr10	88516396:88684945	+	BMPR1A	NM_004329	6717.13	6869.53	6555.22	0.954246	-0.0675665	0.939275	-0.0903802	0.111418	0.184734
TRCN0000000798	CDS	chr10	88516396:88684945	+	BMPR1A	NM_004329	2179.87	2195	2163.8	0.985782	-0.0206592	0.986061	-0.0202517	0.780943	0.839598
TRCN0000000795	CDS	chr10	88516396:88684945	+	BMPR1A	NM_004329	655.386	658.087	652.516	0.991535	-0.0122642	0.986152	-0.0201183	0.819526	0.869571
TRCN0000000452	CDS	chr4	95679128:96079601	+	BMPR1B	NM_001203	1832.3	1726.91	1944.28	1.12587	0.171045	1.16275	0.217541	0.0201619	0.0557047
TRCN0000000454	CDS	chr4	95679128:96079601	+	BMPR1B	NM_001203	1823.31	1924.14	1716.18	0.891918	-0.165016	0.88484	-0.176512	0.0152698	0.0469817
TRCN0000000453	CDS	chr4	95679128:96079601	+	BMPR1B	NM_001203	2257.72	2276.47	2237.79	0.98301	-0.0247226	0.984751	-0.022169	0.747779	0.812956
TRCN0000000456	3UTR	chr2	203241050:203432474	+	BMPR2	NM_001204	1269.88	1159.11	1387.56	1.19709	0.259537	1.23475	0.304222	0.00317004	0.0211748
TRCN0000000457	CDS	chr2	203241050:203432474	+	BMPR2	NM_001204	712.823	666.025	762.546	1.14492	0.195248	1.18512	0.245031	0.0472956	0.0989357
TRCN0000000459	CDS	chr2	203241050:203432474	+	BMPR2	NM_001204	1043.13	1036.54	1050.14	1.01313	0.0188152	1.03384	0.0480079	0.552946	0.645184
TRCN0000000458	CDS	chr2	203241050:203432474	+	BMPR2	NM_001204	1638.16	1688.1	1585.1	0.938988	-0.090822	0.948247	-0.0766648	0.319729	0.4186
TRCN0000000460	CDS	chr2	203241050:203432474	+	BMPR2	NM_001204	5441.62	5540.3	5336.77	0.963263	-0.053998	0.965085	-0.0512722	0.322363	0.420219
TRCN0000006360	CDS	chrX	15518900:15574652	+	BMX	NM_001721	12095.3	13381.9	10728.2	0.801694	-0.318876	0.804918	-0.313086	0.000151613	0.00836981
TRCN0000006362	CDS	chrX	15518900:15574652	+	BMX	NM_001721	4964.18	5331.56	4573.84	0.85788	-0.221152	0.84415	-0.244428	0.000263927	0.00977013
TRCN0000006359	3UTR	chrX	15518900:15574652	+	BMX	NM_001721	8660.94	9254.98	8029.78	0.867617	-0.204869	0.863988	-0.210917	0.0282949	0.0689818
TRCN0000006361	CDS	chrX	15518900:15574652	+	BMX	NM_001721	14159	14449.5	13850.2	0.958525	-0.0611119	0.964809	-0.0516843	0.341063	0.438134
TRCN0000006363	CDS	chrX	15518900:15574652	+	BMX	NM_001721	4357.06	4386.57	4325.72	0.986128	-0.020153	0.982446	-0.0255496	0.64855	0.729892
TRCN0000006291	CDS	chr7	140433813:140624564	-	BRAF	NM_004333	2870.06	2715.3	3034.49	1.11755	0.160339	1.12546	0.170519	0.0118306	0.0405969
TRCN0000006292	CDS	chr7	140433813:140624564	-	BRAF	NM_004333	3402.83	3296.63	3515.67	1.06644	0.0928053	1.08085	0.112164	0.0435353	0.0937961
TRCN0000006289	CDS	chr7	140433813:140624564	-	BRAF	NM_004333	7498.52	7895.8	7076.41	0.896225	-0.158068	0.894449	-0.160929	0.000542047	0.0114566
TRCN0000006293	CDS	chr7	140433813:140624564	-	BRAF	NM_004333	6990.35	7579.32	6364.57	0.839728	-0.252005	0.84937	-0.235535	0.00576897	0.0274038
TRCN0000006290	CDS	chr7	140433813:140624564	-	BRAF	NM_004333	4396.29	4709.03	4063.99	0.86302	-0.212533	0.864723	-0.209689	0.0126962	0.042093
TRCN0000006312	CDS	chr6	32936437:32949282	+	BRD2	NM_005104	1754.77	1603.79	1915.2	1.19417	0.256014	1.20093	0.264153	0.00035322	0.0104096
TRCN0000006309	CDS	chr6	32936437:32949282	+	BRD2	NM_005104	1505.06	1355.79	1663.66	1.22708	0.29523	1.28218	0.358597	0.00263243	0.0192503
TRCN0000006308	3UTR	chr6	32936437:32949282	+	BRD2	NM_005104	1423.58	1203.48	1657.44	1.37721	0.461753	1.30261	0.381407	0.00903908	0.0345693
TRCN0000006310	CDS	chr6	32936437:32949282	+	BRD2	NM_005104	6089.2	5946.8	6240.49	1.04939	0.0695453	1.03752	0.0531437	0.376903	0.474046
TRCN0000006311	CDS	chr6	32936437:32949282	+	BRD2	NM_005104	2969.22	2941.1	2999.09	1.01972	0.0281686	1.02189	0.0312441	0.600034	0.686002
TRCN0000021378	CDS	chr9	136895446:136933141	-	BRD3	NM_007371	797.751	693.732	908.272	1.30925	0.388746	1.29828	0.376603	0.000561415	0.0116387
TRCN0000021375	CDS	chr9	136895446:136933141	-	BRD3	NM_007371	1467.65	1394.96	1544.88	1.10748	0.147276	1.12557	0.170661	0.00492014	0.0252363
TRCN0000021374	3UTR	chr9	136895446:136933141	-	BRD3	NM_007371	1716.96	1859.46	1565.56	0.841947	-0.248199	0.864746	-0.209652	0.0168757	0.0498313
TRCN0000021377	CDS	chr9	136895446:136933141	-	BRD3	NM_007371	2738.24	2963.81	2498.57	0.843026	-0.246351	0.863543	-0.211661	0.0213899	0.0577477
TRCN0000021376	CDS	chr9	136895446:136933141	-	BRD3	NM_007371	4065.87	4110.25	4018.72	0.977731	-0.03249	0.969543	-0.0446229	0.412153	0.50922
TRCN0000021425	CDS	chr19	15348301:15391262	-	BRD4	NM_058243	2271.02	2215.73	2329.77	1.05147	0.0724067	1.06833	0.0953523	0.0579594	0.114321
TRCN0000021424	3UTR	chr19	15348301:15391262	-	BRD4	NM_058243	9126.56	9778.73	8433.63	0.862446	-0.213494	0.868944	-0.202664	0.0132697	0.0428912
TRCN0000021428	CDS	chr19	15348301:15391262	-	BRD4	NM_058243	1813.06	1870.21	1752.33	0.936969	-0.0939275	0.940229	-0.0889162	0.15418	0.237431
TRCN0000021426	CDS	chr19	15348301:15391262	-	BRD4	NM_058243	1770.28	1797.84	1741	0.968384	-0.0463481	0.963701	-0.053343	0.275994	0.373879
TRCN0000006303	3UTR	chr1	92414928:92479985	+	BRDT	NM_001726	968.25	781.384	1166.8	1.49324	0.578449	1.33697	0.418972	0.00712723	0.0305454
TRCN0000006306	CDS	chr1	92414928:92479985	+	BRDT	NM_001726	4829.39	4426.91	5257.01	1.18751	0.247941	1.21631	0.282512	0.00961156	0.0359207
TRCN0000006307	CDS	chr1	92414928:92479985	+	BRDT	NM_001726	3476.17	3368.68	3590.38	1.06581	0.0919536	1.06943	0.0968407	0.0344201	0.0789824
TRCN0000006304	CDS	chr1	92414928:92479985	+	BRDT	NM_001726	948.243	903.562	995.717	1.10199	0.140112	1.1004	0.138029	0.163737	0.249212
TRCN0000006305	CDS	chr1	92414928:92479985	+	BRDT	NM_001726	5986.71	6300.57	5653.24	0.897258	-0.156405	0.887916	-0.171505	0.0292367	0.0707564
TRCN0000002400	CDS	chr19	55795534:55823903	+	BRSK1	NM_032430	994.218	845.604	1152.12	1.36248	0.446237	1.37	0.454178	0.000264775	0.00977013
TRCN0000002399	3UTR	chr19	55795534:55823903	+	BRSK1	NM_032430	1958.31	2042.56	1868.8	0.914927	-0.128272	0.913835	-0.129995	0.110201	0.183628
TRCN0000002396	CDS	chr19	55795534:55823903	+	BRSK1	NM_032430	1531.48	1582.83	1476.92	0.933093	-0.0999066	0.927452	-0.108655	0.118761	0.194548
TRCN0000002398	CDS	chr19	55795534:55823903	+	BRSK1	NM_032430	3853.18	3984.88	3713.24	0.931831	-0.101859	0.937461	-0.0931689	0.13379	0.212789
TRCN0000002397	CDS	chr19	55795534:55823903	+	BRSK1	NM_032430	7060.09	7221.58	6888.5	0.953877	-0.0681242	0.955424	-0.0657877	0.317714	0.416927
TRCN0000000735	3UTR	chr11	1411129:1483919	+	BRSK2	NM_003957	696.212	603.956	794.234	1.31505	0.39512	1.28341	0.359985	0.0121904	0.0412197
TRCN0000000737	CDS	chr11	1411129:1483919	+	BRSK2	NM_003957	1639.92	1604.12	1677.97	1.04604	0.0649342	1.04291	0.0606142	0.446967	0.543081
TRCN0000000738	CDS	chr11	1411129:1483919	+	BRSK2	NM_003957	1980.57	1975.5	1985.96	1.0053	0.00761994	1.01276	0.0182896	0.767563	0.829067
TRCN0000000736	CDS	chr11	1411129:1483919	+	BRSK2	NM_003957	2528.64	2694.7	2352.2	0.872899	-0.196113	0.863977	-0.210936	0.00312845	0.0211646
TRCN0000000739	CDS	chr11	1411129:1483919	+	BRSK2	NM_003957	3109.92	3372.96	2830.45	0.83916	-0.252982	0.860996	-0.215922	0.00638869	0.0290976
TRCN0000000358	3UTR	chrX	100604435:100645784	-	BTK	NM_000061	1343.18	1329.06	1358.19	1.02191	0.031275	1.01654	0.0236699	0.723615	0.795315
TRCN0000000359	CDS	chrX	100604435:100645784	-	BTK	NM_000061	2072.41	2273.98	1858.24	0.817175	-0.291283	0.830514	-0.267923	0.00306032	0.0209075
TRCN0000000360	CDS	chrX	100604435:100645784	-	BTK	NM_000061	2538.8	2669.68	2399.74	0.898887	-0.153788	0.892771	-0.163638	0.0695494	0.130911
TRCN0000000361	CDS	chrX	100604435:100645784	-	BTK	NM_000061	737.561	785.325	686.81	0.874555	-0.193379	0.892918	-0.163401	0.103796	0.174894
TRCN0000000801	CDS	chr2	111395275:111435684	-	BUB1	NM_004336	1751.58	1730.14	1774.36	1.02556	0.0364076	1.01604	0.0229576	0.720005	0.791827
TRCN0000000802	CDS	chr2	111395275:111435684	-	BUB1	NM_004336	3737.63	4049.33	3406.46	0.841241	-0.249409	0.83461	-0.260825	0.000550338	0.0114883
TRCN0000000800	CDS	chr2	111395275:111435684	-	BUB1	NM_004336	9319.56	9558.07	9066.14	0.948533	-0.0762304	0.945403	-0.080998	0.0759587	0.139312
TRCN0000000799	3UTR	chr2	111395275:111435684	-	BUB1	NM_004336	1777.93	1831.09	1721.45	0.940125	-0.0890757	0.950433	-0.0733437	0.386029	0.482296
TRCN0000000462	CDS	chr15	40453210:40513337	+	BUB1B	NM_001211	1639.61	1384.63	1910.52	1.3798	0.46446	1.31306	0.392932	0.00708042	0.0305454
TRCN0000000463	CDS	chr15	40453210:40513337	+	BUB1B	NM_001211	143.507	121.918	166.446	1.36523	0.44914	1.29067	0.368122	0.0155631	0.0474935
TRCN0000000464	CDS	chr15	40453210:40513337	+	BUB1B	NM_001211	1450.59	1425.09	1477.69	1.03691	0.0522902	1.01769	0.0252998	0.72721	0.797517
TRCN0000000465	CDS	chr15	40453210:40513337	+	BUB1B	NM_001211	1442.02	1428.52	1456.37	1.01949	0.027851	1.01319	0.0189045	0.775754	0.836112
TRCN0000000461	3UTR	chr15	40453210:40513337	+	BUB1B	NM_001211	3967.52	4358.08	3552.54	0.815162	-0.294841	0.824956	-0.277612	0.00469588	0.0249837
TRCN0000037572	CDS	chr14	90863327:90874619	+	CALM1	NM_006888	730.059	633.527	832.624	1.31427	0.394259	1.31838	0.398767	0.00183675	0.0168197
TRCN0000037573	CDS	chr14	90863327:90874619	+	CALM1	NM_006888	5283.23	5562.81	4986.18	0.896341	-0.157881	0.906366	-0.141835	0.0276541	0.0681529
TRCN0000037571	CDS	chr14	90863327:90874619	+	CALM1	NM_006888	1928.71	2056.72	1792.71	0.871638	-0.198199	0.872916	-0.196086	0.0450641	0.095801
TRCN0000037569	CDS	chr14	90863327:90874619	+	CALM1	NM_006888	1462.94	1486.44	1437.97	0.96739	-0.0478299	0.963326	-0.0539035	0.444302	0.540304
TRCN0000052581	CDS	chr2	47387221:47403740	-	CALM2	NM_001743	650.083	593.936	709.74	1.19498	0.256984	1.16829	0.224396	0.0655414	0.125281
TRCN0000052580	CDS	chr2	47387221:47403740	-	CALM2	NM_001743	2760.33	3013.29	2491.56	0.826855	-0.274294	0.842217	-0.247737	0.00914706	0.0347506
TRCN0000052579	CDS	chr2	47387221:47403740	-	CALM2	NM_001743	2243.24	2365.39	2113.46	0.893494	-0.16247	0.898544	-0.154339	0.0758664	0.139312
TRCN0000052582	CDS	chr2	47387221:47403740	-	CALM2	NM_001743	2675.58	2824.22	2517.66	0.891455	-0.165767	0.891339	-0.165954	0.0839337	0.14947
TRCN0000052578	CDS	chr2	47387221:47403740	-	CALM2	NM_001743	2475.86	2507.79	2441.94	0.973743	-0.0383872	0.966928	-0.04852	0.380809	0.477561
TRCN0000037899	CDS	chr19	47104512:47114039	+	CALM3	NM_005184	825.002	760.198	893.856	1.17582	0.233668	1.22989	0.298533	0.00710131	0.0305454
TRCN0000037902	CDS	chr19	47104512:47114039	+	CALM3	NM_005184	1090.85	1026.54	1159.18	1.12921	0.175308	1.14148	0.190905	0.0884429	0.155292
TRCN0000037900	CDS	chr19	47104512:47114039	+	CALM3	NM_005184	3772.56	4181.74	3337.81	0.798187	-0.325201	0.817917	-0.289974	0.00718925	0.0305609
TRCN0000037901	CDS	chr19	47104512:47114039	+	CALM3	NM_005184	965.077	998.661	929.393	0.93064	-0.103706	0.960171	-0.0586361	0.452643	0.548512
TRCN0000037903	CDS	chr19	47104512:47114039	+	CALM3	NM_005184	962.011	971.76	951.652	0.979308	-0.0301658	0.962246	-0.0555228	0.577296	0.665651
TRCN0000000676	3UTR	chr3	9799029:9811668	-	CAMK1	NM_003656	2419.37	2155.81	2699.41	1.25215	0.324413	1.26911	0.343817	0.000707008	0.0124446
TRCN0000000678	CDS	chr3	9799029:9811668	-	CAMK1	NM_003656	3093.86	3019.4	3172.97	1.05086	0.0715752	1.07743	0.107598	0.12601	0.20332
TRCN0000009995	CDS	chr3	9799029:9811668	-	CAMK1	NM_003656	732.491	669.185	799.753	1.19512	0.257151	1.00304	0.00438088	0.973732	0.983879
TRCN0000000679	CDS	chr3	9799029:9811668	-	CAMK1	NM_003656	1962.54	2124.28	1790.7	0.842967	-0.246451	0.85653	-0.223425	0.00157204	0.0159836
TRCN0000010002	CDS	chr3	9799029:9811668	-	CAMK1	NM_003656	13609	14832.7	12308.8	0.829844	-0.269088	0.825818	-0.276105	0.00252483	0.0189741
TRCN0000009994	CDS	chr3	9799029:9811668	-	CAMK1	NM_003656	3024.76	3124.24	2919.05	0.934323	-0.0980067	0.928794	-0.106569	0.0792993	0.144294
TRCN0000010000	CDS	chr3	9799029:9811668	-	CAMK1	NM_003656	8514.24	8814.05	8195.7	0.929846	-0.104937	0.927605	-0.108417	0.106354	0.178603
TRCN0000000677	CDS	chr3	9799029:9811668	-	CAMK1	NM_003656	2672.3	2737.79	2602.7	0.950657	-0.0730029	0.971513	-0.0416946	0.358566	0.456329
TRCN0000010001	CDS	chr3	9799029:9811668	-	CAMK1	NM_003656	2804.14	2829.33	2777.37	0.981635	-0.0267414	0.986516	-0.019585	0.76439	0.826531
TRCN0000001755	CDS	chr10	12391583:12871733	+	CAMK1D	NM_020397	4623.57	4607.99	4640.13	1.00698	0.0100298	1.00259	0.00373038	0.941721	0.958596
TRCN0000001752	CDS	chr10	12391583:12871733	+	CAMK1D	NM_020397	6964.94	7360.53	6544.61	0.889149	-0.169503	0.876939	-0.189452	0.00521085	0.0258911
TRCN0000001753	CDS	chr10	12391583:12871733	+	CAMK1D	NM_020397	4967.46	5345.76	4565.52	0.854045	-0.227616	0.865797	-0.207898	0.00884278	0.0341817
TRCN0000001756	CDS	chr10	12391583:12871733	+	CAMK1D	NM_020397	3140.08	3313.34	2955.99	0.89215	-0.164642	0.901759	-0.149186	0.107051	0.179273
TRCN0000001754	CDS	chr10	12391583:12871733	+	CAMK1D	NM_020397	5806.88	5834.29	5777.75	0.99031	-0.0140486	0.996813	-0.00460461	0.92967	0.951187
TRCN0000001455	CDS	chr1	209757045:209787284	+	CAMK1G	NM_020439	730.333	555.516	916.075	1.64905	0.721638	1.50071	0.585643	0.000103478	0.00730241
TRCN0000001452	3UTR	chr1	209757045:209787284	+	CAMK1G	NM_020439	941.521	837.857	1051.66	1.25518	0.327896	1.25843	0.331626	0.0181758	0.0520876
TRCN0000001453	CDS	chr1	209757045:209787284	+	CAMK1G	NM_020439	1408.2	1397.27	1419.81	1.01613	0.0230919	1.05278	0.0742017	0.40462	0.501953
TRCN0000001456	CDS	chr1	209757045:209787284	+	CAMK1G	NM_020439	2079.6	2221.49	1928.84	0.868262	-0.203797	0.8693	-0.202074	0.0225009	0.0596452
TRCN0000001454	CDS	chr1	209757045:209787284	+	CAMK1G	NM_020439	4241.8	4364.14	4111.81	0.94218	-0.085925	0.94588	-0.0802703	0.260471	0.35785
TRCN0000010286	CDS	chr5	149599054:149669403	-	CAMK2A	NM_171825	809.066	790.454	828.842	1.04857	0.0684171	1.05739	0.080508	0.289756	0.386454
TRCN0000010284	CDS	chr5	149599054:149669403	-	CAMK2A	NM_171825	2229.84	2322.37	2131.53	0.917827	-0.123706	0.912978	-0.131348	0.0818436	0.147214
TRCN0000010283	CDS	chr5	149599054:149669403	-	CAMK2A	NM_171825	1418.15	1482.33	1349.95	0.910698	-0.134955	0.904746	-0.144416	0.125716	0.203129
TRCN0000010285	CDS	chr5	149599054:149669403	-	CAMK2A	NM_171825	669.645	671.592	667.577	0.994021	-0.00865111	1.01076	0.0154378	0.894154	0.926837
TRCN0000000466	3UTR	chr7	44256749:44365230	-	CAMK2B	NM_001220	1562	1508.84	1618.49	1.07268	0.101214	1.05843	0.0819282	0.269159	0.366602
TRCN0000000468	CDS	chr7	44256749:44365230	-	CAMK2B	NM_001220	1649.04	1624.08	1675.57	1.0317	0.0450255	1.03471	0.049224	0.512215	0.606665
TRCN0000000469	CDS	chr7	44256749:44365230	-	CAMK2B	NM_001220	2878.57	3183.37	2554.71	0.802518	-0.317394	0.821671	-0.283368	0.00377116	0.0223592
TRCN0000000467	CDS	chr7	44256749:44365230	-	CAMK2B	NM_001220	687.54	702.688	671.444	0.955537	-0.0656167	0.950491	-0.0732555	0.426076	0.522343
TRCN0000000472	CDS	chr4	114372188:114683083	-	CAMK2D	NM_001221	2740.9	2973.33	2493.94	0.83877	-0.253652	0.845852	-0.241523	0.006322	0.0288813
TRCN0000000474	CDS	chr4	114372188:114683083	-	CAMK2D	NM_001221	1426.13	1521.38	1324.93	0.870875	-0.199462	0.891334	-0.165962	0.123191	0.20006
TRCN0000000471	3UTR	chr4	114372188:114683083	-	CAMK2D	NM_001221	82.1467	84.8353	79.29	0.934634	-0.0975268	0.976739	-0.0339552	0.828313	0.876112
TRCN0000000476	3UTR	chr10	75572259:75634349	-	CAMK2G	NM_001222	2193.13	2077.64	2315.84	1.11465	0.156592	1.14025	0.189347	0.0522012	0.105882
TRCN0000000477	CDS	chr10	75572259:75634349	-	CAMK2G	NM_001222	9.01198	8.96278	9.06425	1.01132	0.0162405	0.998263	-0.00250877	0.975634	0.984476
TRCN0000000479	CDS	chr10	75572259:75634349	-	CAMK2G	NM_001222	2399.8	2577.78	2210.69	0.857597	-0.221629	0.857265	-0.222187	0.00220489	0.0179618
TRCN0000000480	CDS	chr10	75572259:75634349	-	CAMK2G	NM_001222	1271.6	1354.53	1183.48	0.873717	-0.194763	0.865722	-0.208025	0.0444498	0.0949651
TRCN0000000478	CDS	chr10	75572259:75634349	-	CAMK2G	NM_001222	2367.18	2466.09	2262.09	0.917279	-0.124568	0.912446	-0.13219	0.116399	0.191125
TRCN0000037618	CDS	chr1	20808884:20812728	-	CAMK2N1	NM_018584	2164.4	2270.04	2052.16	0.904019	-0.145575	0.907664	-0.13977	0.0184576	0.0525156
TRCN0000037615	CDS	chr1	20808884:20812728	-	CAMK2N1	NM_018584	2572.6	2698.08	2439.28	0.904081	-0.145476	0.894122	-0.161456	0.033175	0.0770069
TRCN0000037614	CDS	chr1	20808884:20812728	-	CAMK2N1	NM_018584	1256.36	1303.27	1206.51	0.925756	-0.111296	0.930723	-0.103576	0.215854	0.306933
TRCN0000037616	CDS	chr1	20808884:20812728	-	CAMK2N1	NM_018584	206.446	213.42	199.036	0.9326	-0.10067	0.942998	-0.084674	0.504797	0.599296
TRCN0000000578	CDS	chr5	110559947:110820748	+	CAMK4	NM_001744	943.555	936.507	951.045	1.01552	0.0222235	1.0288	0.0409593	0.654814	0.735565
TRCN0000000581	CDS	chr5	110559947:110820748	+	CAMK4	NM_001744	3439.55	3712.41	3149.64	0.848409	-0.237169	0.858095	-0.220791	0.00473736	0.0250272
TRCN0000000579	CDS	chr5	110559947:110820748	+	CAMK4	NM_001744	2501.95	2628.81	2367.16	0.900466	-0.151256	0.886094	-0.174469	0.0516765	0.10503
TRCN0000000577	3UTR	chr5	110559947:110820748	+	CAMK4	NM_001744	1446.62	1491.15	1399.31	0.938407	-0.0917136	0.933975	-0.0985448	0.238844	0.33378
TRCN0000001984	CDS	chr17	3763617:3796337	-	CAMKK1	NM_172207	507.05	450.427	567.211	1.25928	0.332594	1.26636	0.340692	0.0016593	0.0162241
TRCN0000001983	CDS	chr17	3763617:3796337	-	CAMKK1	NM_172207	1659.69	1574.93	1749.76	1.11101	0.151872	1.12672	0.172134	0.0123091	0.0414346
TRCN0000001982	CDS	chr17	3763617:3796337	-	CAMKK1	NM_172207	1697.31	1775.66	1614.05	0.908983	-0.137675	0.898976	-0.153645	0.0949863	0.163932
TRCN0000001981	CDS	chr17	3763617:3796337	-	CAMKK1	NM_172207	150.882	167.412	133.32	0.796356	-0.328515	0.854935	-0.226113	0.126964	0.20475
TRCN0000001980	CDS	chr17	3763617:3796337	-	CAMKK1	NM_172207	1754.01	1827.36	1676.08	0.917211	-0.124674	0.925949	-0.110995	0.243611	0.338555
TRCN0000002301	3UTR	chr12	121675495:121736111	-	CAMKK2	NM_153499	481.427	400.54	567.37	1.41651	0.502345	1.38421	0.46906	0.000258583	0.00977013
TRCN0000002300	CDS	chr12	121675495:121736111	-	CAMKK2	NM_153499	912.405	843.951	985.138	1.16729	0.223167	1.18409	0.243782	0.0399097	0.0882705
TRCN0000002298	CDS	chr12	121675495:121736111	-	CAMKK2	NM_153499	857.412	795.464	923.232	1.16062	0.214897	1.17091	0.227633	0.0601564	0.117088
TRCN0000002297	CDS	chr12	121675495:121736111	-	CAMKK2	NM_153499	1418.73	1359.94	1481.19	1.08915	0.123208	1.07867	0.109247	0.0607312	0.117931
TRCN0000002299	CDS	chr12	121675495:121736111	-	CAMKK2	NM_153499	1166.03	1213.71	1115.38	0.918981	-0.121893	0.930259	-0.104295	0.321802	0.419957
TRCN0000010256	CDS	chr3	49895422:49907369	-	CAMKV	NM_024046	288.855	257.796	321.854	1.24848	0.320176	1.18624	0.2464	0.065183	0.124803
TRCN0000010255	CDS	chr3	49895422:49907369	-	CAMKV	NM_024046	790.41	754.105	828.984	1.09929	0.136577	1.08683	0.12013	0.204594	0.294545
TRCN0000010254	CDS	chr3	49895422:49907369	-	CAMKV	NM_024046	1256.86	1435.65	1066.9	0.743145	-0.428283	0.790601	-0.338978	0.000662625	0.0120787
TRCN0000010253	CDS	chr3	49895422:49907369	-	CAMKV	NM_024046	1728.55	1908.38	1537.48	0.805649	-0.311777	0.822345	-0.282184	0.0023371	0.0186586
TRCN0000010257	CDS	chr3	49895422:49907369	-	CAMKV	NM_024046	3141.39	3281.4	2992.63	0.912	-0.132895	0.920452	-0.119586	0.0343681	0.0789799
TRCN0000000694	CDS	chrX	41374189:41782287	-	CASK	NM_003688	4637.57	4795.84	4469.42	0.931936	-0.101697	0.933433	-0.0993819	0.0241393	0.0625541
TRCN0000000690	3UTR	chrX	41374189:41782287	-	CASK	NM_003688	1450.49	1546.54	1348.43	0.871903	-0.19776	0.861006	-0.215904	0.0257646	0.0652006
TRCN0000000693	CDS	chrX	41374189:41782287	-	CASK	NM_003688	1616.65	1681.11	1548.15	0.920907	-0.118872	0.924386	-0.113432	0.0474922	0.0992113
TRCN0000000692	CDS	chrX	41374189:41782287	-	CASK	NM_003688	2112.29	2209.88	2008.59	0.908912	-0.137787	0.910335	-0.135531	0.143865	0.225474
TRCN0000000691	CDS	chrX	41374189:41782287	-	CASK	NM_003688	1794.02	1806.04	1781.25	0.986273	-0.0199403	0.995503	-0.00650268	0.922484	0.946249
TRCN0000006995	CDS	NA	NA:NA	NA	CDC2L2	NM_024011	719.449	678.288	763.183	1.12516	0.17013	1.12237	0.166547	0.0829271	0.148292
TRCN0000006991	CDS	NA	NA:NA	NA	CDC2L2	NM_024011	35.988	32.82	39.354	1.19909	0.261936	1.06637	0.092707	0.517516	0.611272
TRCN0000006994	CDS	NA	NA:NA	NA	CDC2L2	NM_024011	1845.71	2055.92	1622.36	0.789117	-0.341689	0.826475	-0.274956	0.015748	0.0476722
TRCN0000006993	CDS	NA	NA:NA	NA	CDC2L2	NM_024011	767.961	797.416	736.665	0.923816	-0.114322	0.929962	-0.104756	0.164073	0.249596
TRCN0000006992	CDS	NA	NA:NA	NA	CDC2L2	NM_024011	696.711	720.529	671.405	0.931822	-0.101873	0.930302	-0.104229	0.34034	0.437393
TRCN0000000661	CDS	chr1	227177566:227505826	-	CDC42BPA	NM_003607	6124.7	5874.6	6390.44	1.08781	0.121426	1.08577	0.118725	0.00354637	0.0218451
TRCN0000000660	CDS	chr1	227177566:227505826	-	CDC42BPA	NM_003607	2867.18	2772.33	2967.96	1.07056	0.0983723	1.09743	0.134132	0.031078	0.073386
TRCN0000000662	CDS	chr1	227177566:227505826	-	CDC42BPA	NM_003607	10622.1	11385	9811.56	0.861795	-0.214583	0.860455	-0.216829	0.00250443	0.0189154
TRCN0000000659	3UTR	chr1	227177566:227505826	-	CDC42BPA	NM_003607	5704.56	6291.92	5080.49	0.807462	-0.308533	0.829337	-0.269969	0.00327947	0.0212863
TRCN0000000663	CDS	chr1	227177566:227505826	-	CDC42BPA	NM_003607	3620.85	3668.71	3570	0.973093	-0.0393502	0.991379	-0.0124913	0.848701	0.892026
TRCN0000000853	3UTR	chr14	103398716:103523742	-	CDC42BPB	NM_006035	3429.3	3198.64	3674.37	1.14873	0.200039	1.19022	0.25123	0.0125862	0.0418982
TRCN0000000856	CDS	chr14	103398716:103523742	-	CDC42BPB	NM_006035	4887.51	4814.29	4965.29	1.03137	0.0445555	1.04251	0.0600568	0.181348	0.269068
TRCN0000000855	CDS	chr14	103398716:103523742	-	CDC42BPB	NM_006035	1278.67	1269.34	1288.57	1.01515	0.0216901	0.993795	-0.00898041	0.891799	0.925034
TRCN0000000854	CDS	chr14	103398716:103523742	-	CDC42BPB	NM_006035	3093.34	3145.73	3037.67	0.965648	-0.0504307	0.967807	-0.0472091	0.40836	0.505157
TRCN0000021469	3UTR	chr11	64591662:64612041	-	CDC42BPG	XM_290516	634.971	575.115	698.567	1.21465	0.280546	1.23845	0.308533	0.00365407	0.0221008
TRCN0000021473	CDS	chr11	64591662:64612041	-	CDC42BPG	XM_290516	1340.47	1314.68	1367.87	1.04046	0.0572259	1.0464	0.0654389	0.32067	0.419284
TRCN0000021471	CDS	chr11	64591662:64612041	-	CDC42BPG	XM_290516	2626.89	2596.89	2658.77	1.02383	0.0339739	1.03372	0.0478394	0.490042	0.583855
TRCN0000021472	CDS	chr11	64591662:64612041	-	CDC42BPG	XM_290516	1396.28	1413.12	1378.39	0.975426	-0.0358952	0.999801	-0.000287407	0.997011	0.997963
TRCN0000003172	CDS	chr1	91966404:91991321	+	CDC7	NM_003503	787.485	674.427	907.609	1.34575	0.428408	1.32977	0.41118	0.000511482	0.0114566
TRCN0000003171	3UTR	chr1	91966404:91991321	+	CDC7	NM_003503	1520.8	1513.65	1528.39	1.00974	0.0139826	1.01819	0.0260089	0.674969	0.75286
TRCN0000003169	CDS	chr1	91966404:91991321	+	CDC7	NM_003503	4885.47	5155.35	4598.73	0.892032	-0.164833	0.886895	-0.173165	0.00172486	0.0164601
TRCN0000003168	CDS	chr1	91966404:91991321	+	CDC7	NM_003503	3330.29	3745.44	2889.2	0.771391	-0.374466	0.800165	-0.321631	0.00402998	0.0229968
TRCN0000003170	CDS	chr1	91966404:91991321	+	CDC7	NM_003503	2612.78	2637.58	2586.42	0.980604	-0.0282578	0.981336	-0.0271805	0.703578	0.777558
TRCN0000000583	CDS	chr10	62538089:62554610	+	CDK1	NM_001786	1339.87	1243.9	1441.85	1.15913	0.213044	1.19859	0.26134	0.0044442	0.0242467
TRCN0000000582	3UTR	chr10	62538089:62554610	+	CDK1	NM_001786	907.434	816.181	1004.39	1.2306	0.29936	1.2527	0.325038	0.00609325	0.0283598
TRCN0000000584	CDS	chr10	62538089:62554610	+	CDK1	NM_001786	911.636	820.052	1008.94	1.23034	0.299059	1.25164	0.323824	0.016028	0.0482766
TRCN0000000585	CDS	chr10	62538089:62554610	+	CDK1	NM_001786	87.0548	86.8514	87.2709	1.00483	0.0069501	0.994484	-0.00797983	0.959341	0.972935
TRCN0000000586	CDS	chr10	62538089:62554610	+	CDK1	NM_001786	3253.32	3283.62	3221.13	0.980968	-0.0277222	0.987915	-0.0175412	0.810913	0.862258
TRCN0000000687	CDS	chr16	89753076:89762772	+	CDK10	NM_003674	4113.45	4090.67	4137.65	1.01148	0.0164736	1.01128	0.0161801	0.772791	0.833217
TRCN0000001820	CDS	chr16	89753076:89762772	+	CDK10	NM_052987	1246.84	1245.39	1248.39	1.0024	0.00346078	0.993854	-0.00889394	0.909085	0.93618
TRCN0000000688	CDS	chr16	89753076:89762772	+	CDK10	NM_003674	10851.7	11432.5	10234.5	0.895218	-0.159689	0.892228	-0.164516	0.000586979	0.0116852
TRCN0000000689	CDS	chr16	89753076:89762772	+	CDK10	NM_003674	2365.85	2602.25	2114.67	0.81263	-0.29933	0.825112	-0.277338	0.00577129	0.0274038
TRCN0000000686	CDS	chr16	89753076:89762772	+	CDK10	NM_003674	5665.53	5793.73	5529.32	0.954362	-0.067391	0.951768	-0.0713185	0.142952	0.224323
TRCN0000000685	3UTR	chr16	89753076:89762772	+	CDK10	NM_003674	1338.36	1345.11	1331.18	0.989642	-0.0150211	1.01099	0.0157686	0.856224	0.897423
TRCN0000006209	CDS	chr1	1570603:1655859	-	CDK11B	NM_001787	1943.28	1847.56	2044.98	1.10685	0.146465	1.13889	0.187632	0.0302297	0.0723491
TRCN0000006210	CDS	chr1	1570603:1655859	-	CDK11B	NM_001787	857.458	849.535	865.876	1.01924	0.027487	1.00508	0.0073175	0.931867	0.951458
TRCN0000006207	CDS	chr1	1570603:1655859	-	CDK11B	NM_001787	121.997	110.959	133.726	1.20519	0.269259	0.99528	-0.00682512	0.956561	0.971426
TRCN0000006206	CDS	chr1	1570603:1655859	-	CDK11B	NM_001787	4418.48	4816.14	3995.98	0.829706	-0.269327	0.837882	-0.255181	0.00387305	0.0228027
TRCN0000006208	CDS	chr1	1570603:1655859	-	CDK11B	NM_001787	6352.81	6762.07	5917.98	0.875174	-0.192359	0.862005	-0.214232	0.0120726	0.041006
TRCN0000001796	CDS	chr17	37617764:37690818	+	CDK12	NM_016507	10339.1	10153.3	10536.4	1.03773	0.0534375	1.04779	0.0673525	0.187868	0.276477
TRCN0000001795	CDS	chr17	37617764:37690818	+	CDK12	NM_016507	5984.02	6363.56	5580.75	0.876986	-0.189375	0.883175	-0.179228	0.000303372	0.00991009
TRCN0000001797	CDS	chr17	37617764:37690818	+	CDK12	NM_016507	3287.96	3471.92	3092.5	0.890718	-0.166959	0.88379	-0.178225	0.00556509	0.0269383
TRCN0000001799	3UTR	chr17	37617764:37690818	+	CDK12	NM_016507	2991.52	3011.96	2969.81	0.986007	-0.0203299	0.970838	-0.0426982	0.463886	0.558224
TRCN0000001798	CDS	chr17	37617764:37690818	+	CDK12	NM_016507	5265.04	5303.73	5223.94	0.984955	-0.0218707	0.995731	-0.00617225	0.897103	0.929001
TRCN0000000702	CDS	chr7	39989959:40136733	+	CDK13	NM_003718	1250.24	1123.38	1385.02	1.2329	0.302061	1.24661	0.318007	0.00208909	0.0177549
TRCN0000000704	CDS	chr7	39989959:40136733	+	CDK13	NM_003718	869.232	808.734	933.512	1.15429	0.207004	1.19405	0.255868	0.0250144	0.0640082
TRCN0000000700	3UTR	chr7	39989959:40136733	+	CDK13	NM_003718	4332.09	4559.37	4090.6	0.897185	-0.156523	0.880568	-0.183493	0.00794243	0.0323071
TRCN0000000703	CDS	chr7	39989959:40136733	+	CDK13	NM_003718	2405.31	2515.4	2288.35	0.909736	-0.136479	0.905306	-0.143523	0.0536145	0.107875
TRCN0000000701	CDS	chr7	39989959:40136733	+	CDK13	NM_003718	1862.99	1908.59	1814.53	0.950716	-0.072913	0.950205	-0.0736887	0.365542	0.463051
TRCN0000002366	CDS	chr7	90225676:90839905	+	CDK14	NM_012395	886.684	769.169	1011.54	1.31511	0.395188	1.31691	0.397162	0.00695579	0.0302642
TRCN0000002369	CDS	chr7	90225676:90839905	+	CDK14	NM_012395	1737.88	1605.57	1878.46	1.16996	0.22646	1.15676	0.210089	0.00784598	0.03222
TRCN0000002367	CDS	chr7	90225676:90839905	+	CDK14	NM_012395	5277.7	5716.6	4811.37	0.841649	-0.24871	0.840111	-0.251348	6.16337e-05	0.00686112
TRCN0000002370	3UTR	chr7	90225676:90839905	+	CDK14	NM_012395	2645.49	2805.14	2475.86	0.882614	-0.180145	0.885577	-0.17531	0.0169576	0.049926
TRCN0000002368	CDS	chr7	90225676:90839905	+	CDK14	NM_012395	458.506	460.311	456.589	0.991912	-0.0117156	1.00459	0.00660463	0.953945	0.969098
TRCN0000002098	CDS	chr2	202671152:202760273	+	CDK15	NM_139158	586.75	553.129	622.473	1.12537	0.170394	1.14196	0.19151	0.0939798	0.162545
TRCN0000002096	CDS	chr2	202671152:202760273	+	CDK15	NM_139158	1434.34	1421.22	1448.28	1.01904	0.0272123	1.02814	0.0400345	0.548867	0.642179
TRCN0000002099	3UTR	chr2	202671152:202760273	+	CDK15	NM_139158	3624.15	3783.93	3454.37	0.912906	-0.131461	0.900117	-0.151815	0.00755093	0.0313359
TRCN0000002100	CDS	chr2	202671152:202760273	+	CDK15	NM_139158	4641.81	4923.18	4342.85	0.882122	-0.18095	0.871265	-0.198816	0.0404861	0.0890931
TRCN0000002097	CDS	chr2	202671152:202760273	+	CDK15	NM_139158	2857.53	2981.6	2725.7	0.914176	-0.129456	0.925906	-0.111062	0.166728	0.252359
TRCN0000010251	CDS	chrX	47077528:47089394	+	CDK16	NM_033018	1102.32	1160.29	1040.73	0.896954	-0.156894	0.890513	-0.167291	0.0577608	0.114183
TRCN0000010250	CDS	chrX	47077528:47089394	+	CDK16	NM_033018	2589.65	2750.84	2418.39	0.879144	-0.185828	0.902447	-0.148086	0.079422	0.144376
TRCN0000010249	CDS	chrX	47077528:47089394	+	CDK16	NM_033018	2949.95	3055.33	2837.98	0.928861	-0.106466	0.926062	-0.110819	0.0964184	0.16543
TRCN0000010259	CDS	chrX	47077528:47089394	+	CDK16	NM_033018	1755.62	1840.9	1665.01	0.904454	-0.14488	0.908707	-0.138113	0.134504	0.213699
TRCN0000010258	CDS	chrX	47077528:47089394	+	CDK16	NM_033018	1158.09	1177.97	1136.98	0.965206	-0.0510912	0.980822	-0.027937	0.727091	0.797517
TRCN0000006244	CDS	chr12	96672039:96794366	-	CDK17	NM_002595	995.297	894.418	1102.48	1.23262	0.301732	1.2295	0.298076	0.00445248	0.0242467
TRCN0000006245	CDS	chr12	96672039:96794366	-	CDK17	NM_002595	1603.8	1471.4	1744.48	1.18559	0.245601	1.20914	0.273983	0.0101023	0.0370658
TRCN0000006242	CDS	chr12	96672039:96794366	-	CDK17	NM_002595	1322.54	1267.03	1381.52	1.09036	0.124804	1.11787	0.160759	0.0231025	0.0608109
TRCN0000006243	CDS	chr12	96672039:96794366	-	CDK17	NM_002595	1630.78	1576.38	1688.57	1.07117	0.0991858	1.0769	0.106889	0.0756834	0.139061
TRCN0000006241	3UTR	chr12	96672039:96794366	-	CDK17	NM_002595	459.783	470.59	448.301	0.952635	-0.0700041	0.9637	-0.0533438	0.601618	0.686845
TRCN0000006337	CDS	chr1	205473684:205501921	+	CDK18	NM_002596	15913.3	17152.7	14596.3	0.850962	-0.232834	0.850809	-0.233093	0.00348892	0.0217353
TRCN0000006335	CDS	chr1	205473684:205501921	+	CDK18	NM_002596	3788.13	4047.74	3512.29	0.867716	-0.204705	0.856324	-0.223772	0.00569513	0.0273039
TRCN0000006336	CDS	chr1	205473684:205501921	+	CDK18	NM_002596	3967.84	4270.86	3645.89	0.853666	-0.228256	0.855978	-0.224355	0.0144872	0.0453631
TRCN0000006333	3UTR	chr1	205473684:205501921	+	CDK18	NM_002596	1660.55	1695.03	1623.92	0.958046	-0.0618326	0.975095	-0.0363847	0.573252	0.662004
TRCN0000006334	CDS	chr1	205473684:205501921	+	CDK18	NM_002596	1920.53	1937.12	1902.91	0.982336	-0.025711	0.985219	-0.0214835	0.704139	0.777891
TRCN0000003140	CDS	chr6	110931181:111136412	-	CDK19	NM_015076	2802.71	2559.75	3060.87	1.19577	0.257937	1.21786	0.284346	0.000237748	0.00977013
TRCN0000003144	3UTR	chr6	110931181:111136412	-	CDK19	NM_015076	2996.1	2673.84	3338.5	1.24858	0.320288	1.27801	0.353897	0.00282949	0.0200128
TRCN0000003142	CDS	chr6	110931181:111136412	-	CDK19	NM_015076	1874.12	2064.37	1671.97	0.809915	-0.304157	0.825018	-0.277503	0.00492891	0.0252363
TRCN0000003141	CDS	chr6	110931181:111136412	-	CDK19	NM_015076	2183.4	2308.01	2051.01	0.888646	-0.17032	0.887358	-0.172412	0.0427706	0.0929634
TRCN0000003143	CDS	chr6	110931181:111136412	-	CDK19	NM_015076	1314.9	1348.57	1279.13	0.948511	-0.0762629	0.951774	-0.0713092	0.467438	0.561373
TRCN0000039960	CDS	chr12	56360553:56366573	+	CDK2	NM_052827	2019.78	1938.61	2106.01	1.08635	0.119487	1.10287	0.141257	0.0124942	0.04182
TRCN0000000587	3UTR	chr12	56360553:56366573	+	CDK2	NM_001798	319.677	289.725	351.501	1.21322	0.278842	1.19459	0.256515	0.0138669	0.0441099
TRCN0000039962	CDS	chr12	56360553:56366573	+	CDK2	NM_052827	1066.31	999.713	1137.07	1.13739	0.185731	1.15188	0.203988	0.0185528	0.0526136
TRCN0000039958	3UTR	chr12	56360553:56366573	+	CDK2	NM_052827	775.581	701.718	854.061	1.2171	0.283447	1.23469	0.304154	0.0190755	0.0535396
TRCN0000000588	CDS	chr12	56360553:56366573	+	CDK2	NM_001798	676.139	616.896	739.085	1.19807	0.260713	1.19063	0.251722	0.0356493	0.0808168
TRCN0000000591	CDS	chr12	56360553:56366573	+	CDK2	NM_001798	1387.5	1379.83	1395.65	1.01146	0.0164457	1.03645	0.0516465	0.384779	0.481334
TRCN0000039959	CDS	chr12	56360553:56366573	+	CDK2	NM_052827	2942.75	2913.6	2973.72	1.02064	0.0294705	1.02144	0.0306067	0.570258	0.659814
TRCN0000000590	CDS	chr12	56360553:56366573	+	CDK2	NM_001798	1696.15	1682.94	1710.17	1.01618	0.0231568	0.995425	-0.00661518	0.942305	0.958596
TRCN0000039961	CDS	chr12	56360553:56366573	+	CDK2	NM_052827	5968.08	5976	5959.66	0.997267	-0.00394822	1.00331	0.00476907	0.934802	0.953207
TRCN0000002216	CDS	chr9	90581359:90589695	-	CDK20	NM_178432	1985.57	1766.29	2218.57	1.25606	0.328908	1.24314	0.313988	0.00536528	0.0264151
TRCN0000002215	CDS	chr9	90581359:90589695	-	CDK20	NM_178432	1528.32	1575.7	1477.99	0.937988	-0.0923585	0.934654	-0.0974961	0.277843	0.375201
TRCN0000002217	3UTR	chr9	90581359:90589695	-	CDK20	NM_178432	4753.49	4844.86	4656.41	0.961102	-0.0572384	0.961829	-0.0561476	0.317858	0.416927
TRCN0000002218	CDS	chr9	90581359:90589695	-	CDK20	NM_178432	1389.03	1410.18	1366.57	0.969077	-0.0453173	0.970383	-0.0433733	0.562055	0.653526
TRCN0000000483	CDS	chr17	73996987:74002080	+	CDK3	NM_001258	1009.74	882.872	1144.55	1.29639	0.374499	1.29533	0.373316	0.00915584	0.0347506
TRCN0000000482	CDS	chr17	73996987:74002080	+	CDK3	NM_001258	494.048	425.507	566.873	1.33223	0.413843	1.3001	0.378627	0.0106689	0.0380888
TRCN0000000481	3UTR	chr17	73996987:74002080	+	CDK3	NM_001258	455.951	478.432	432.064	0.903084	-0.147068	0.891835	-0.165152	0.182541	0.270305
TRCN0000000484	CDS	chr17	73996987:74002080	+	CDK3	NM_001258	2576.77	2682.92	2463.99	0.918399	-0.122808	0.926865	-0.109569	0.192883	0.281346
TRCN0000000363	CDS	chr12	58141510:58146230	-	CDK4	NM_000075	792.051	719.716	868.907	1.20729	0.271774	1.23356	0.302824	0.00719798	0.0305609
TRCN0000000362	3UTR	chr12	58141510:58146230	-	CDK4	NM_000075	457.369	433.674	482.545	1.11269	0.154054	1.16262	0.217386	0.0783767	0.142989
TRCN0000000365	CDS	chr12	58141510:58146230	-	CDK4	NM_000075	1875.67	2043.21	1697.66	0.83088	-0.267289	0.8413	-0.249307	0.0148179	0.0461105
TRCN0000021467	CDS	chr7	150750899:150755052	-	CDK5	NM_004935	1236.97	1188.46	1288.52	1.08419	0.116622	1.10459	0.143505	0.0412459	0.0903682
TRCN0000021464	3UTR	chr7	150750899:150755052	-	CDK5	NM_004935	5528.04	6078.2	4943.49	0.813315	-0.298114	0.827309	-0.273501	0.000671808	0.0120787
TRCN0000021465	CDS	chr7	150750899:150755052	-	CDK5	NM_004935	2822.62	3007.78	2625.88	0.873027	-0.195902	0.874052	-0.194209	0.0107837	0.0383618
TRCN0000021468	CDS	chr7	150750899:150755052	-	CDK5	NM_004935	438.897	439.204	438.571	0.998559	-0.00208111	1.05285	0.0742945	0.518593	0.61229
TRCN0000021466	CDS	chr7	150750899:150755052	-	CDK5	NM_004935	2164.98	2166.02	2163.86	0.999004	-0.00143774	0.995533	-0.00645832	0.930962	0.951458
TRCN0000006218	CDS	chr17	30814105:30818271	+	CDK5R1	NM_003885	2306.61	2140.31	2483.3	1.16025	0.214441	1.1617	0.216239	0.0175653	0.0509172
TRCN0000006220	CDS	chr17	30814105:30818271	+	CDK5R1	NM_003885	3166.49	2937.82	3409.45	1.16054	0.214794	1.18727	0.247649	0.0176631	0.0511022
TRCN0000006216	3UTR	chr17	30814105:30818271	+	CDK5R1	NM_003885	253.76	216.84	292.987	1.35117	0.434205	1.23483	0.304313	0.0512733	0.104362
TRCN0000006217	CDS	chr17	30814105:30818271	+	CDK5R1	NM_003885	2725.6	2899.26	2541.07	0.876454	-0.190249	0.881958	-0.181219	0.0184541	0.0525156
TRCN0000006219	CDS	chr17	30814105:30818271	+	CDK5R1	NM_003885	1730.01	1775.44	1681.73	0.947218	-0.078232	0.931679	-0.102095	0.172341	0.258769
TRCN0000039746	CDS	chr7	92234235:92465941	-	CDK6	NM_001259	884.384	785.519	989.428	1.25958	0.332948	1.27773	0.353585	0.0087481	0.0340191
TRCN0000039744	CDS	chr7	92234235:92465941	-	CDK6	NM_001259	1795.88	1956.6	1625.1	0.830574	-0.267819	0.857766	-0.221344	0.0452242	0.0959145
TRCN0000039747	CDS	chr7	92234235:92465941	-	CDK6	NM_001259	2745.63	2834.41	2651.29	0.935394	-0.0963532	0.930754	-0.103528	0.152882	0.236057
TRCN0000039745	CDS	chr7	92234235:92465941	-	CDK6	NM_001259	3714.73	3769.56	3656.47	0.97	-0.0439428	0.975946	-0.0351261	0.561315	0.653306
TRCN0000039743	CDS	chr7	92234235:92465941	-	CDK6	NM_001259	7957.81	8046.65	7863.42	0.977229	-0.0332312	0.992158	-0.0113582	0.821583	0.871139
TRCN0000000596	CDS	chr5	68530622:68573257	+	CDK7	NM_001799	558.804	481.964	640.446	1.32883	0.410153	1.32577	0.406835	0.00245486	0.0189154
TRCN0000000594	CDS	chr5	68530622:68573257	+	CDK7	NM_001799	2346.33	2530.83	2150.31	0.849645	-0.235068	0.854276	-0.227226	0.0219558	0.0586602
TRCN0000000593	CDS	chr5	68530622:68573257	+	CDK7	NM_001799	1329.02	1371.02	1284.39	0.936809	-0.0941737	0.950562	-0.0731473	0.298625	0.395971
TRCN0000000493	CDS	chr13	26828756:26978569	+	CDK8	NM_001260	546.013	505.104	589.478	1.16704	0.222859	1.19089	0.252038	0.0446387	0.0950985
TRCN0000000490	CDS	chr13	26828756:26978569	+	CDK8	NM_001260	291.839	281.838	302.464	1.07319	0.101899	1.06452	0.0901998	0.495068	0.58891
TRCN0000000489	3UTR	chr13	26828756:26978569	+	CDK8	NM_001260	972.153	945.635	1000.33	1.05784	0.0811182	1.02574	0.0366613	0.748191	0.81311
TRCN0000000492	CDS	chr13	26828756:26978569	+	CDK8	NM_001260	1442.04	1495.72	1385.01	0.925986	-0.110937	0.927131	-0.109155	0.222323	0.313905
TRCN0000000498	CDS	chr9	130548305:130553052	+	CDK9	NM_001261	1611.57	1532.32	1695.78	1.10667	0.146226	1.1111	0.151991	0.0477666	0.0995168
TRCN0000000497	CDS	chr9	130548305:130553052	+	CDK9	NM_001261	2645.16	2962.98	2307.47	0.778768	-0.360735	0.79277	-0.335026	1.56493e-05	0.00553144
TRCN0000000496	CDS	chr9	130548305:130553052	+	CDK9	NM_001261	1897.6	2108.01	1674.04	0.79413	-0.332552	0.810712	-0.302738	0.00207065	0.0177332
TRCN0000000495	CDS	chr9	130548305:130553052	+	CDK9	NM_001261	1207.79	1307.3	1102.06	0.843003	-0.24639	0.852267	-0.230622	0.0140823	0.0445595
TRCN0000000494	3UTR	chr9	130548305:130553052	+	CDK9	NM_001261	707.26	722.443	691.127	0.956653	-0.063933	0.964187	-0.0526156	0.578394	0.666406
TRCN0000006071	CDS	chr14	50796309:50864122	-	CDKL1	NM_004196	1838.82	1793.59	1886.88	1.05201	0.0731529	1.06039	0.0845905	0.178279	0.265915
TRCN0000006070	CDS	chr14	50796309:50864122	-	CDKL1	NM_004196	1445.11	1388.08	1505.71	1.08474	0.117353	1.07272	0.101273	0.195827	0.284101
TRCN0000006069	CDS	chr14	50796309:50864122	-	CDKL1	NM_004196	1251.68	1223.73	1281.38	1.04711	0.0664084	1.0419	0.0592105	0.371021	0.468019
TRCN0000006073	CDS	chr14	50796309:50864122	-	CDKL1	NM_004196	1448.96	1428.38	1470.83	1.02972	0.0422528	1.04052	0.0573114	0.513071	0.60744
TRCN0000006072	CDS	chr14	50796309:50864122	-	CDKL1	NM_004196	1366.12	1427.81	1300.58	0.910895	-0.134643	0.921147	-0.118496	0.0820435	0.14736
TRCN0000000727	CDS	chr4	76501704:76555721	-	CDKL2	NM_003948	1120.04	1025.61	1220.36	1.18989	0.25083	1.2427	0.313483	0.0053846	0.0264151
TRCN0000000724	3UTR	chr4	76501704:76555721	-	CDKL2	NM_003948	2970.57	2966.45	2974.95	1.00286	0.00412454	0.986805	-0.0191627	0.776501	0.836313
TRCN0000000726	CDS	chr4	76501704:76555721	-	CDKL2	NM_003948	3444.79	3626.59	3251.62	0.896605	-0.157456	0.879998	-0.184427	0.0280384	0.0686347
TRCN0000000725	CDS	chr4	76501704:76555721	-	CDKL2	NM_003948	1619.62	1738.28	1493.53	0.8592	-0.218934	0.858694	-0.219784	0.0526882	0.106582
TRCN0000000728	CDS	chr4	76501704:76555721	-	CDKL2	NM_003948	3396.08	3511.17	3273.8	0.932398	-0.100983	0.93191	-0.101738	0.165046	0.250569
TRCN0000002378	3UTR	chr5	133634115:133702765	-	CDKL3	NM_016508	3511.55	3484.26	3540.54	1.01615	0.0231169	1.02214	0.0315941	0.678465	0.755078
TRCN0000002376	CDS	chr5	133634115:133702765	-	CDKL3	NM_016508	7878.44	8351.81	7375.49	0.883101	-0.17935	0.883312	-0.179005	0.00490354	0.0252363
TRCN0000002377	CDS	chr5	133634115:133702765	-	CDKL3	NM_016508	1530.58	1588.47	1469.06	0.924823	-0.112751	0.928803	-0.106555	0.129874	0.208326
TRCN0000002380	CDS	chr5	133634115:133702765	-	CDKL3	NM_016508	8395.3	8552.54	8228.24	0.962081	-0.0557694	0.954313	-0.0674656	0.288999	0.386102
TRCN0000002379	CDS	chr5	133634115:133702765	-	CDKL3	NM_016508	1892.83	1948.5	1833.69	0.941075	-0.0876181	0.942502	-0.0854321	0.32784	0.425329
TRCN0000021520	CDS	chr2	39405688:39456673	-	CDKL4	XM_293029	1751.24	1517.58	1999.51	1.31756	0.397871	1.32056	0.401147	0.00113715	0.0137279
TRCN0000021519	3UTR	chr2	39405688:39456673	-	CDKL4	XM_293029	601.627	507.434	701.707	1.38285	0.467648	1.33669	0.418666	0.00564084	0.0271302
TRCN0000021521	CDS	chr2	39405688:39456673	-	CDKL4	XM_293029	5731.86	5581.53	5891.59	1.05555	0.0779977	1.05296	0.0744441	0.124567	0.20175
TRCN0000021523	CDS	chr2	39405688:39456673	-	CDKL4	XM_293029	1307.79	1268.15	1349.9	1.06446	0.0901193	1.0643	0.0899008	0.365847	0.463241
TRCN0000021522	CDS	chr2	39405688:39456673	-	CDKL4	XM_293029	2824.99	2923.4	2720.44	0.930575	-0.103806	0.928215	-0.107468	0.229233	0.321997
TRCN0000002012	CDS	chrX	18443725:18671749	+	CDKL5	NM_003159	593.432	568.856	619.545	1.08911	0.123145	1.10561	0.144847	0.159015	0.243132
TRCN0000002011	CDS	chrX	18443725:18671749	+	CDKL5	NM_003159	827.161	803.264	852.552	1.06136	0.0859135	1.07452	0.103688	0.184565	0.272764
TRCN0000002015	CDS	chrX	18443725:18671749	+	CDKL5	NM_003159	18.0343	12.9435	23.4433	1.8112	0.85695	1.05227	0.0735082	0.408003	0.505125
TRCN0000002014	3UTR	chrX	18443725:18671749	+	CDKL5	NM_003159	1638.72	1595.02	1685.15	1.05651	0.0793073	1.03836	0.0543094	0.505613	0.599792
TRCN0000002013	CDS	chrX	18443725:18671749	+	CDKL5	NM_003159	1718.32	1711.62	1725.45	1.00808	0.011609	1.01462	0.0209387	0.75631	0.819563
TRCN0000010400	CDS	chr6	36644237:36655116	+	CDKN1A	NM_000389	11.9823	10.8558	13.1792	1.21402	0.279796	1.02214	0.0315922	0.745701	0.811284
TRCN0000002527	3UTR	chr14	54863673:54886934	+	CDKN3	NM_005192	1953.86	1739.84	2181.25	1.25371	0.326203	1.25338	0.325829	0.00266856	0.0192503
TRCN0000002524	CDS	chr14	54863673:54886934	+	CDKN3	NM_005192	989.144	889.826	1094.67	1.2302	0.298898	1.2455	0.31672	0.0129317	0.042229
TRCN0000002523	CDS	chr14	54863673:54886934	+	CDKN3	NM_005192	1415.43	1490	1336.21	0.896783	-0.157169	0.904391	-0.144982	0.0629396	0.121257
TRCN0000002526	CDS	chr14	54863673:54886934	+	CDKN3	NM_005192	2726.33	2850.2	2594.71	0.910359	-0.135493	0.916248	-0.126191	0.121939	0.19835
TRCN0000002525	CDS	chr14	54863673:54886934	+	CDKN3	NM_005192	2258.62	2300.92	2213.67	0.96208	-0.0557714	0.971362	-0.0419192	0.485879	0.579584
TRCN0000037686	CDS	chr22	47080307:47134152	-	CERK	NM_182661	2127.6	1767.94	2509.75	1.41959	0.505473	1.33514	0.416994	0.0061257	0.0284604
TRCN0000037685	CDS	chr22	47080307:47134152	-	CERK	NM_182661	3445.07	3261.97	3639.61	1.11577	0.158041	1.15646	0.209718	0.0156416	0.0474935
TRCN0000037688	CDS	chr22	47080307:47134152	-	CERK	NM_182661	2515.54	2391.87	2646.93	1.10664	0.146181	1.11558	0.157796	0.0330641	0.0769077
TRCN0000037684	CDS	chr22	47080307:47134152	-	CERK	NM_182661	14508.5	14337.2	14690.6	1.02464	0.0351219	1.03101	0.0440601	0.344234	0.441642
TRCN0000037687	CDS	chr22	47080307:47134152	-	CERK	NM_182661	4741.07	5108.56	4350.61	0.85163	-0.231702	0.86392	-0.21103	0.0132057	0.0428587
TRCN0000039853	CDS	chr11	125495031:125546150	+	CHEK1	NM_001274	4843.97	4483.98	5226.45	1.16558	0.221052	1.16723	0.22309	0.00271179	0.0194409
TRCN0000039854	CDS	chr11	125495031:125546150	+	CHEK1	NM_001274	1382.27	1243.23	1530	1.23067	0.299439	1.23636	0.306096	0.00315273	0.0211646
TRCN0000039857	CDS	chr11	125495031:125546150	+	CHEK1	NM_001274	1772.43	1721.54	1826.49	1.06096	0.0853718	1.06373	0.0891386	0.187315	0.27588
TRCN0000039855	CDS	chr11	125495031:125546150	+	CHEK1	NM_001274	10045.2	10466.5	9597.49	0.916969	-0.125055	0.911011	-0.13446	0.051128	0.104257
TRCN0000039856	CDS	chr11	125495031:125546150	+	CHEK1	NM_001274	2071.81	2166.9	1970.78	0.909492	-0.136868	0.926354	-0.110365	0.125756	0.203129
TRCN0000039944	CDS	chr22	29083731:29137822	-	CHEK2	NM_007194	5756.28	5682.92	5834.23	1.02663	0.0379099	1.03284	0.0466114	0.220999	0.312667
TRCN0000039947	CDS	chr22	29083731:29137822	-	CHEK2	NM_007194	3752.3	3710.62	3796.58	1.02317	0.0330396	0.999032	-0.0013965	0.981368	0.987741
TRCN0000039946	CDS	chr22	29083731:29137822	-	CHEK2	NM_007194	3337.29	3460.18	3206.71	0.926747	-0.109752	0.931911	-0.101736	0.175789	0.263289
TRCN0000006046	3UTR	chr11	67820326:67888858	-	CHKA	NM_001277	550.696	462.543	644.358	1.39308	0.478274	1.38361	0.46844	0.00187186	0.0168197
TRCN0000006047	CDS	chr11	67820326:67888858	-	CHKA	NM_001277	2823.86	2700.35	2955.09	1.09434	0.13006	1.09969	0.137091	0.0297138	0.0715923
TRCN0000006049	CDS	chr11	67820326:67888858	-	CHKA	NM_001277	2678.73	2569.86	2794.41	1.08738	0.120856	1.07521	0.104619	0.0349603	0.0797615
TRCN0000006048	CDS	chr11	67820326:67888858	-	CHKA	NM_001277	3273.03	3194.11	3356.88	1.05096	0.0717079	1.05682	0.0797277	0.14947	0.23244
TRCN0000006050	CDS	chr11	67820326:67888858	-	CHKA	NM_001277	594.856	600.567	588.789	0.98039	-0.0285731	1.00933	0.0134019	0.897478	0.929001
TRCN0000052553	CDS	chr22	51017387:51021428	-	CHKB	NM_005198	896.063	828.542	967.805	1.16808	0.224143	1.19778	0.260363	0.0274704	0.0681319
TRCN0000052554	CDS	chr22	51017387:51021428	-	CHKB	NM_005198	846.256	823.31	870.636	1.05748	0.080635	1.06235	0.0872625	0.137679	0.217822
TRCN0000052555	CDS	chr22	51017387:51021428	-	CHKB	NM_005198	1609.43	1536.02	1687.42	1.09857	0.135623	1.09597	0.132205	0.186005	0.274487
TRCN0000052557	CDS	chr22	51017387:51021428	-	CHKB	NM_005198	3159.15	3341.65	2965.25	0.88736	-0.172409	0.889299	-0.16926	0.00785729	0.0322224
TRCN0000052556	CDS	chr22	51017387:51021428	-	CHKB	NM_005198	2342.29	2456.08	2221.39	0.904445	-0.144895	0.899642	-0.152576	0.0898663	0.156602
TRCN0000000505	CDS	chr10	101948124:101989344	-	CHUK	NM_001278	5188.72	5336.28	5031.94	0.942969	-0.0847176	0.931434	-0.102475	0.0503708	0.103452
TRCN0000000506	CDS	chr10	101948124:101989344	-	CHUK	NM_001278	1673.18	1715.56	1628.16	0.949058	-0.0754314	0.937499	-0.0931117	0.205345	0.295201
TRCN0000000508	CDS	chr10	101948124:101989344	-	CHUK	NM_001278	2196.03	2215.41	2175.43	0.981956	-0.0262698	0.977295	-0.0331347	0.640257	0.721639
TRCN0000006313	3UTR	chr12	120123595:120315095	-	CIT	NM_007174	814.058	793.009	836.422	1.05474	0.076893	1.05184	0.0729131	0.421712	0.517626
TRCN0000006315	CDS	chr12	120123595:120315095	-	CIT	NM_007174	5304.04	5627.38	4960.48	0.88149	-0.181984	0.877088	-0.189207	0.0025014	0.0189154
TRCN0000006317	CDS	chr12	120123595:120315095	-	CIT	NM_007174	2299.64	2524.22	2061.02	0.816499	-0.292477	0.84309	-0.246242	0.0293399	0.070897
TRCN0000006316	CDS	chr12	120123595:120315095	-	CIT	NM_007174	4456.5	4661.18	4239.03	0.909433	-0.136961	0.910693	-0.134964	0.0483655	0.100542
TRCN0000006314	CDS	chr12	120123595:120315095	-	CIT	NM_007174	1962.53	2008.22	1913.98	0.953075	-0.0693377	0.965377	-0.0508354	0.525301	0.618752
TRCN0000006053	CDS	chr14	103985995:103989196	-	CKB	NM_001823	1976.71	1841.32	2120.56	1.15165	0.2037	1.15092	0.202783	0.00714353	0.0305454
TRCN0000006051	3UTR	chr14	103985995:103989196	-	CKB	NM_001823	2242.49	2122.85	2369.6	1.11624	0.158644	1.15136	0.203336	0.032565	0.0759428
TRCN0000006054	CDS	chr14	103985995:103989196	-	CKB	NM_001823	680.592	654.432	708.386	1.08244	0.114293	1.11928	0.162567	0.0990755	0.168925
TRCN0000006052	CDS	chr14	103985995:103989196	-	CKB	NM_001823	2916.86	3078.09	2745.56	0.891969	-0.164935	0.90716	-0.140571	0.0537692	0.108114
TRCN0000010088	CDS	chr19	45809671:45826235	-	CKM	NM_001824	5603.19	6106.28	5068.65	0.830072	-0.268692	0.849918	-0.234604	0.00521094	0.0258911
TRCN0000010091	CDS	chr19	45809671:45826235	-	CKM	NM_001824	7747.45	8383.88	7071.24	0.843434	-0.245653	0.854639	-0.226614	0.0084582	0.0333666
TRCN0000010090	CDS	chr19	45809671:45826235	-	CKM	NM_001824	5781.99	6109.44	5434.08	0.889456	-0.169004	0.887379	-0.172377	0.0309207	0.0731896
TRCN0000010089	CDS	chr19	45809671:45826235	-	CKM	NM_001824	3470.58	3516.96	3421.3	0.972801	-0.0397835	0.979279	-0.0302088	0.553107	0.645184
TRCN0000006056	CDS	chr15	43885252:43891604	+	CKMT1B	NM_020990	1103.25	1002.53	1210.27	1.20721	0.271683	1.2336	0.302872	0.00896675	0.0344681
TRCN0000006057	CDS	chr15	43885252:43891604	+	CKMT1B	NM_020990	514.986	491.556	539.88	1.09831	0.135282	1.11337	0.154932	0.167473	0.253232
TRCN0000006059	CDS	chr15	43885252:43891604	+	CKMT1B	NM_020990	1590.75	1569.67	1613.14	1.02769	0.0394058	1.03355	0.0476017	0.520913	0.614305
TRCN0000006058	CDS	chr15	43885252:43891604	+	CKMT1B	NM_020990	2412.78	2594.19	2220.03	0.855771	-0.224704	0.866958	-0.205967	0.00338034	0.0215739
TRCN0000006055	CDS	chr15	43885252:43891604	+	CKMT1B	NM_020990	4009.39	4069.23	3945.8	0.969668	-0.0444369	0.974033	-0.0379575	0.601168	0.686592
TRCN0000006060	CDS	chr5	80529139:80562217	+	CKMT2	NM_001825	655.961	560.433	757.459	1.35156	0.434625	1.38193	0.466689	0.0012203	0.014118
TRCN0000006062	CDS	chr5	80529139:80562217	+	CKMT2	NM_001825	1498.5	1371.4	1633.54	1.19115	0.252352	1.20982	0.274796	0.004264	0.0236487
TRCN0000006063	CDS	chr5	80529139:80562217	+	CKMT2	NM_001825	3535.09	3736.67	3320.9	0.888731	-0.170181	0.884996	-0.176258	0.0182715	0.0522091
TRCN0000006061	CDS	chr5	80529139:80562217	+	CKMT2	NM_001825	4796.16	5108.57	4464.23	0.87387	-0.194509	0.879444	-0.185336	0.0324686	0.0757768
TRCN0000000757	CDS	chr2	201717732:201729467	-	CLK1	NM_004071	4833.6	4520.51	5166.25	1.14284	0.19263	1.13769	0.186103	0.00198689	0.0173118
TRCN0000000758	CDS	chr2	201717732:201729467	-	CLK1	NM_004071	1358.94	1269.26	1454.23	1.14573	0.196266	1.14063	0.189836	0.0223933	0.0594649
TRCN0000000754	3UTR	chr2	201717732:201729467	-	CLK1	NM_004071	1247.53	1205.33	1292.36	1.07221	0.100584	1.09665	0.133098	0.111351	0.184725
TRCN0000000756	CDS	chr2	201717732:201729467	-	CLK1	NM_004071	2179.44	2115.49	2247.39	1.06235	0.0872632	1.07021	0.0978906	0.204852	0.294694
TRCN0000000755	CDS	chr2	201717732:201729467	-	CLK1	NM_004071	2364.93	2440.32	2284.83	0.936284	-0.0949812	0.920397	-0.119672	0.211634	0.302219
TRCN0000000750	3UTR	chr1	155232659:155243281	-	CLK2	NM_003993	1099.35	1075.87	1124.29	1.04501	0.0635138	1.09162	0.126477	0.151093	0.233978
TRCN0000000753	CDS	chr1	155232659:155243281	-	CLK2	NM_003993	914.752	906.105	923.939	1.01968	0.02812	1.01705	0.0243875	0.776788	0.836313
TRCN0000000752	CDS	chr1	155232659:155243281	-	CLK2	NM_003993	5535.84	6073.5	4964.58	0.817416	-0.290858	0.84142	-0.249103	0.0133868	0.0431303
TRCN0000000751	CDS	chr1	155232659:155243281	-	CLK2	NM_003993	3279.09	3402.07	3148.41	0.92544	-0.111789	0.916666	-0.125532	0.183756	0.271703
TRCN0000000748	CDS	chr15	74900713:74922542	+	CLK3	NM_003992	1404.2	1259.05	1558.42	1.23777	0.30774	1.23796	0.307969	0.000665823	0.0120787
TRCN0000000749	CDS	chr15	74900713:74922542	+	CLK3	NM_003992	1729.95	1608.8	1858.67	1.15531	0.208281	1.17963	0.23833	0.0194764	0.054441
TRCN0000000745	CDS	chr15	74900713:74922542	+	CLK3	NM_003992	2338.83	2477.45	2191.56	0.884601	-0.176901	0.883743	-0.178302	0.00564027	0.0271302
TRCN0000000747	CDS	chr15	74900713:74922542	+	CLK3	NM_003992	2716.75	2862.94	2561.43	0.894684	-0.16055	0.89677	-0.157191	0.0164332	0.0489577
TRCN0000000746	CDS	chr15	74900713:74922542	+	CLK3	NM_003992	3276.4	3498.49	3040.44	0.869072	-0.202453	0.881399	-0.182133	0.0590043	0.115751
TRCN0000001351	CDS	chr5	178029665:178054054	-	CLK4	NM_020666	443.082	362.631	528.561	1.45757	0.543566	1.36412	0.447968	0.0037846	0.0223947
TRCN0000001352	CDS	chr5	178029665:178054054	-	CLK4	NM_020666	2088.81	2320.54	1842.6	0.794039	-0.332719	0.806685	-0.309923	0.00361126	0.0220639
TRCN0000001353	CDS	chr5	178029665:178054054	-	CLK4	NM_020666	2281.13	2510.28	2037.65	0.811724	-0.300939	0.827778	-0.272684	0.00364989	0.0221008
TRCN0000001350	3UTR	chr5	178029665:178054054	-	CLK4	NM_020666	4517.05	4715.71	4305.97	0.913112	-0.131136	0.916282	-0.126137	0.0484055	0.100542
TRCN0000006441	CDS	chr1	47799469:47844511	+	CMPK1	NM_016308	2857.36	2733.74	2988.7	1.09326	0.128641	1.09662	0.133064	0.0886959	0.155623
TRCN0000006442	CDS	chr1	47799469:47844511	+	CMPK1	NM_016308	1963.38	1877.59	2054.53	1.09424	0.129924	1.09129	0.126037	0.130607	0.209099
TRCN0000006440	3UTR	chr1	47799469:47844511	+	CMPK1	NM_016308	2514.22	2499.37	2530	1.01225	0.0175703	1.03298	0.0468083	0.413918	0.510556
TRCN0000006444	CDS	chr1	47799469:47844511	+	CMPK1	NM_016308	11817.5	12350.7	11250.9	0.910956	-0.134547	0.902668	-0.147733	3.40523e-05	0.00602125
TRCN0000006443	CDS	chr1	47799469:47844511	+	CMPK1	NM_016308	4944.63	5042.41	4840.74	0.960005	-0.0588869	0.95125	-0.0721038	0.194142	0.282474
TRCN0000006215	CDS	chr5	74666928:74807806	-	COL4A3BP	NM_005713	488.671	432.01	548.873	1.27051	0.345406	1.26478	0.338887	0.0125221	0.04182
TRCN0000006212	CDS	chr5	74666928:74807806	-	COL4A3BP	NM_005713	638.708	620.971	657.553	1.05891	0.0825817	1.05693	0.0798824	0.455654	0.551208
TRCN0000006213	CDS	chr5	74666928:74807806	-	COL4A3BP	NM_005713	1468.87	1560.52	1371.49	0.878869	-0.18628	0.87215	-0.197351	0.0154413	0.0472675
TRCN0000006211	CDS	chr5	74666928:74807806	-	COL4A3BP	NM_005713	834.275	902.596	761.685	0.843883	-0.244885	0.862573	-0.213282	0.0751485	0.138587
TRCN0000006214	CDS	chr5	74666928:74807806	-	COL4A3BP	NM_005713	868.237	935.553	796.715	0.851599	-0.231754	0.883908	-0.178032	0.104203	0.175383
TRCN0000001590	3UTR	chr5	149432854:149492935	-	CSF1R	NM_005211	2240.08	2159.77	2325.41	1.07669	0.106603	1.08969	0.123921	0.0826283	0.148022
TRCN0000001591	CDS	chr5	149432854:149492935	-	CSF1R	NM_005211	2337.64	2457.82	2209.95	0.899148	-0.15337	0.906007	-0.142406	0.0603306	0.117305
TRCN0000000805	CDS	chr15	75074425:75095539	+	CSK	NM_004383	2556.57	2471.1	2647.4	1.07134	0.099423	1.06807	0.09501	0.0681187	0.128783
TRCN0000000804	CDS	chr15	75074425:75095539	+	CSK	NM_004383	247.33	235.809	259.57	1.10076	0.138504	1.09474	0.130584	0.345257	0.442388
TRCN0000000803	3UTR	chr15	75074425:75095539	+	CSK	NM_004383	4148.31	4429.25	3849.81	0.86918	-0.202274	0.866132	-0.207341	0.0194865	0.054441
TRCN0000000806	CDS	chr15	75074425:75095539	+	CSK	NM_004383	2887.41	3026.34	2739.8	0.905316	-0.143506	0.911302	-0.134	0.112083	0.185526
TRCN0000000807	CDS	chr15	75074425:75095539	+	CSK	NM_004383	1313.58	1343.95	1281.31	0.953394	-0.0688557	0.966212	-0.0495881	0.625529	0.70876
TRCN0000006044	CDS	chr5	148875457:148931115	-	CSNK1A1	NM_001892	1901.58	1747.62	2065.16	1.1817	0.240859	1.19352	0.25522	0.000238011	0.00977013
TRCN0000006043	CDS	chr5	148875457:148931115	-	CSNK1A1	NM_001892	3578	3365.64	3803.63	1.13013	0.176494	1.13109	0.177707	0.00658195	0.0295539
TRCN0000006045	CDS	chr5	148875457:148931115	-	CSNK1A1	NM_001892	780.553	725.901	838.621	1.15528	0.208245	1.14152	0.190962	0.038173	0.0851878
TRCN0000006042	CDS	chr5	148875457:148931115	-	CSNK1A1	NM_001892	3151.91	3122.89	3182.76	1.01917	0.0273971	1.03199	0.0454271	0.51703	0.611272
TRCN0000007027	CDS	chr13	37677397:37679801	-	CSNK1A1L	NM_145203	2084.07	1887.93	2292.48	1.21429	0.280107	1.24147	0.312053	0.00323133	0.0212365
TRCN0000007025	CDS	chr13	37677397:37679801	-	CSNK1A1L	NM_145203	3178	3127.95	3231.17	1.033	0.0468387	1.04371	0.0617227	0.317672	0.416927
TRCN0000007024	3UTR	chr13	37677397:37679801	-	CSNK1A1L	NM_145203	9177.73	9832.82	8481.69	0.86259	-0.213254	0.866062	-0.207457	0.00152243	0.0157265
TRCN0000007026	CDS	chr13	37677397:37679801	-	CSNK1A1L	NM_145203	12141.3	12511.3	11748	0.938992	-0.0908152	0.937593	-0.092967	0.0834879	0.148852
TRCN0000007028	CDS	chr13	37677397:37679801	-	CSNK1A1L	NM_145203	9799.19	10065.5	9516.21	0.945427	-0.0809619	0.940428	-0.0886106	0.191867	0.280658
TRCN0000000599	CDS	chr17	80200537:80231618	-	CSNK1D	NM_001893	10791.5	11713.3	9812.1	0.837686	-0.255518	0.837637	-0.255603	0.000613113	0.0118142
TRCN0000000600	CDS	chr17	80200537:80231618	-	CSNK1D	NM_001893	7412.6	7932.36	6860.37	0.864858	-0.209464	0.858708	-0.219761	0.0129192	0.042229
TRCN0000000597	CDS	chr17	80200537:80231618	-	CSNK1D	NM_001893	4926.56	4990.2	4858.95	0.973699	-0.0384528	0.961098	-0.0572446	0.342152	0.439346
TRCN0000000601	CDS	chr17	80200537:80231618	-	CSNK1D	NM_001893	1322.9	1357.73	1285.88	0.947076	-0.078448	0.944199	-0.0828365	0.367905	0.465064
TRCN0000009957	CDS	chr22	38686697:38794527	-	CSNK1E	NM_001894	3371.8	3193.69	3561.04	1.11502	0.157072	1.119	0.162215	0.0122545	0.0413434
TRCN0000009955	CDS	chr22	38686697:38794527	-	CSNK1E	NM_001894	2121.82	2037.38	2211.54	1.08548	0.118339	1.09463	0.130438	0.0162381	0.0487143
TRCN0000001837	CDS	chr22	38686697:38794527	-	CSNK1E	NM_152221	3563.57	3437.33	3697.69	1.07575	0.105338	1.11793	0.160834	0.0559477	0.111524
TRCN0000001836	CDS	chr22	38686697:38794527	-	CSNK1E	NM_152221	1636.34	1758.47	1506.59	0.856761	-0.223035	0.8875	-0.172181	0.0961351	0.165208
TRCN0000009966	CDS	chr22	38686697:38794527	-	CSNK1E	NM_001894	2783.86	2823.68	2741.56	0.97092	-0.042576	0.97947	-0.0299262	0.706125	0.779512
TRCN0000010608	CDS	chr15	64457716:64648442	-	CSNK1G1	NM_022048	11444	10104.5	12867.1	1.2734	0.348683	1.29523	0.373205	0.000997727	0.0132573
TRCN0000010607	CDS	chr15	64457716:64648442	-	CSNK1G1	NM_022048	1040.08	967.942	1116.72	1.15371	0.206276	1.18624	0.246395	0.0279049	0.0684194
TRCN0000010609	CDS	chr15	64457716:64648442	-	CSNK1G1	NM_022048	2062.68	2030.09	2097.3	1.03311	0.0469934	1.0187	0.0267291	0.633515	0.716189
TRCN0000010606	3UTR	chr15	64457716:64648442	-	CSNK1G1	NM_022048	7789.27	8375.34	7166.57	0.855675	-0.224865	0.84861	-0.236826	0.00992063	0.0366357
TRCN0000010610	CDS	chr15	64457716:64648442	-	CSNK1G1	NM_022048	10691.7	10869.7	10502.6	0.966225	-0.0495687	0.959669	-0.0593912	0.14802	0.230542
TRCN0000038672	CDS	chr19	1941161:1981336	+	CSNK1G2	NM_001319	876.191	788.656	969.198	1.22892	0.297396	1.20923	0.274086	0.0168957	0.0498414
TRCN0000038673	CDS	chr19	1941161:1981336	+	CSNK1G2	NM_001319	1510.08	1431.2	1593.89	1.11367	0.155327	1.13015	0.17652	0.0201146	0.055644
TRCN0000038669	3UTR	chr19	1941161:1981336	+	CSNK1G2	NM_001319	2100.64	2037.77	2167.44	1.06363	0.0890021	1.07608	0.10578	0.0599373	0.116864
TRCN0000038671	CDS	chr19	1941161:1981336	+	CSNK1G2	NM_001319	1139.14	1241.42	1030.46	0.83006	-0.268712	0.847067	-0.239452	0.00400377	0.0229358
TRCN0000038670	CDS	chr19	1941161:1981336	+	CSNK1G2	NM_001319	1875.83	2025.22	1717.11	0.847865	-0.238093	0.850808	-0.233094	0.0117211	0.0404985
TRCN0000000810	CDS	chr5	122847793:122952738	+	CSNK1G3	NM_004384	745.438	734.676	756.873	1.03021	0.0429439	1.03136	0.0445423	0.647157	0.72887
TRCN0000000811	CDS	chr5	122847793:122952738	+	CSNK1G3	NM_004384	132.924	132.688	133.175	1.00367	0.00528443	0.993844	-0.0089081	0.953351	0.968821
TRCN0000000809	CDS	chr5	122847793:122952738	+	CSNK1G3	NM_004384	7423.25	8210.46	6586.83	0.802249	-0.317879	0.820484	-0.285453	0.00370654	0.0221647
TRCN0000000808	3UTR	chr5	122847793:122952738	+	CSNK1G3	NM_004384	1480.5	1527.83	1430.21	0.936109	-0.0952513	0.944829	-0.0818743	0.312439	0.411746
TRCN0000000606	3UTR	chr20	463338:524482	-	CSNK2A1	NM_001895	2979.25	2784.76	3185.89	1.14405	0.194144	1.17936	0.238002	0.0213745	0.0577477
TRCN0000000607	CDS	chr20	463338:524482	-	CSNK2A1	NM_001895	1792.56	1770.81	1815.67	1.02534	0.0360985	1.02177	0.0310646	0.682523	0.758191
TRCN0000000609	CDS	chr20	463338:524482	-	CSNK2A1	NM_001895	1144.53	1133.3	1156.46	1.02044	0.0291853	1.02272	0.0324046	0.683993	0.759543
TRCN0000000610	CDS	chr20	463338:524482	-	CSNK2A1	NM_001895	8226.07	8502.08	7932.8	0.933042	-0.099986	0.934298	-0.0980456	0.180299	0.267909
TRCN0000000608	CDS	chr20	463338:524482	-	CSNK2A1	NM_001895	5882.05	5985.99	5771.62	0.964188	-0.0526139	0.960599	-0.057994	0.24567	0.340944
TRCN0000000613	CDS	chr16	58191812:58231782	-	CSNK2A2	NM_001896	685.187	649.306	723.31	1.11397	0.155716	1.11672	0.159268	0.0728796	0.135316
TRCN0000000611	3UTR	chr16	58191812:58231782	-	CSNK2A2	NM_001896	1179.86	1129.34	1233.53	1.09226	0.127315	1.12918	0.175275	0.0772171	0.141361
TRCN0000000612	CDS	chr16	58191812:58231782	-	CSNK2A2	NM_001896	6138.74	6564.8	5686.06	0.866143	-0.207322	0.855997	-0.224323	0.000675057	0.0120787
TRCN0000000614	CDS	chr16	58191812:58231782	-	CSNK2A2	NM_001896	1027.82	1031.48	1023.94	0.992694	-0.0105796	0.98981	-0.0147771	0.834032	0.879993
TRCN0000000615	CDS	chr16	58191812:58231782	-	CSNK2A2	NM_001896	1222.87	1225.86	1219.7	0.99497	-0.00727496	1.00739	0.0106214	0.888101	0.92279
TRCN0000078620	CDS	chr11	61100654:61116231	+	DAK	NM_015533	1067	1039.71	1096	1.05414	0.0760667	1.05675	0.0796303	0.27567	0.373777
TRCN0000078618	3UTR	chr11	61100654:61116231	+	DAK	NM_015533	818.7	869.106	765.145	0.880381	-0.183799	0.876428	-0.190293	0.0165693	0.0492166
TRCN0000078621	CDS	chr11	61100654:61116231	+	DAK	NM_015533	1522.34	1603.37	1436.24	0.895767	-0.158804	0.890496	-0.167319	0.0311731	0.0735001
TRCN0000078619	CDS	chr11	61100654:61116231	+	DAK	NM_015533	369.092	411.688	323.834	0.786598	-0.346301	0.830517	-0.267918	0.0460738	0.0969194
TRCN0000078622	CDS	chr11	61100654:61116231	+	DAK	NM_015533	1446.02	1448.96	1442.9	0.995818	-0.00604552	0.988576	-0.0165765	0.814442	0.865398
TRCN0000000985	CDS	chr9	90112143:90323549	+	DAPK1	NM_004938	1015.8	873.789	1166.68	1.3352	0.417053	1.29767	0.375929	0.00300074	0.0206412
TRCN0000000984	CDS	chr9	90112143:90323549	+	DAPK1	NM_004938	1693.16	1602.78	1789.18	1.1163	0.158725	1.158	0.211639	0.00682594	0.0299983
TRCN0000000983	CDS	chr9	90112143:90323549	+	DAPK1	NM_004938	178.341	175.347	181.522	1.03522	0.0499374	1.0226	0.0322487	0.797521	0.851331
TRCN0000000982	3UTR	chr9	90112143:90323549	+	DAPK1	NM_004938	3893.76	4109.86	3664.14	0.89155	-0.165613	0.889136	-0.169524	0.00950775	0.0355919
TRCN0000001719	CDS	chr15	64199235:64338521	-	DAPK2	NM_014326	3547.67	3332.58	3776.21	1.13312	0.180298	1.1435	0.193452	0.00351805	0.021765
TRCN0000001718	3UTR	chr15	64199235:64338521	-	DAPK2	NM_014326	2048.75	1742	2374.68	1.36319	0.446983	1.31845	0.398847	0.00538001	0.0264151
TRCN0000001721	CDS	chr15	64199235:64338521	-	DAPK2	NM_014326	5848.07	5571.89	6141.52	1.10223	0.140428	1.10717	0.146876	0.0294453	0.0710944
TRCN0000001720	CDS	chr15	64199235:64338521	-	DAPK2	NM_014326	5116.88	5250.4	4975.01	0.947548	-0.0777285	0.939496	-0.0900415	0.099223	0.168925
TRCN0000001722	CDS	chr15	64199235:64338521	-	DAPK2	NM_014326	11356	11610.8	11085.2	0.954739	-0.0668223	0.950784	-0.0728103	0.210419	0.300914
TRCN0000000519	CDS	chr19	3958452:3969826	-	DAPK3	NM_001348	1198.3	1159.62	1239.39	1.06879	0.0959838	1.09263	0.127801	0.0476981	0.0995007
TRCN0000000520	CDS	chr19	3958452:3969826	-	DAPK3	NM_001348	902.325	853.533	954.167	1.1179	0.160796	1.10861	0.148757	0.0752636	0.138629
TRCN0000000521	CDS	chr19	3958452:3969826	-	DAPK3	NM_001348	456.744	497.029	413.941	0.832831	-0.263905	0.861668	-0.214797	0.0540366	0.108542
TRCN0000000522	CDS	chr19	3958452:3969826	-	DAPK3	NM_001348	1379.38	1458.63	1295.19	0.88795	-0.17145	0.892504	-0.164069	0.0592198	0.11582
TRCN0000037958	CDS	chr7	87505544:87538856	+	DBF4	NM_006716	1351.12	1324.54	1379.36	1.04139	0.058511	1.06039	0.0845884	0.331518	0.428861
TRCN0000037957	CDS	chr7	87505544:87538856	+	DBF4	NM_006716	1547.48	1675.97	1410.97	0.841882	-0.248309	0.852957	-0.229455	0.00826169	0.0332014
TRCN0000037956	CDS	chr7	87505544:87538856	+	DBF4	NM_006716	1215.03	1267.97	1158.78	0.913885	-0.129916	0.922335	-0.116637	0.250468	0.34636
TRCN0000037955	CDS	chr7	87505544:87538856	+	DBF4	NM_006716	324.86	341.969	306.681	0.896807	-0.15713	0.930111	-0.104525	0.414612	0.510997
TRCN0000037954	CDS	chr7	87505544:87538856	+	DBF4	NM_006716	1652	1686.27	1615.6	0.958094	-0.0617609	0.956241	-0.064554	0.44644	0.54266
TRCN0000078713	3UTR	chr17	43100706:43138477	-	DCAKD	NM_024819	2028.47	1917.32	2146.56	1.11956	0.162933	1.12025	0.163815	0.0380247	0.0850463
TRCN0000078716	CDS	chr17	43100706:43138477	-	DCAKD	NM_024819	1897.65	2086.64	1696.86	0.8132	-0.298318	0.816381	-0.292685	0.000132887	0.00802518
TRCN0000078715	CDS	chr17	43100706:43138477	-	DCAKD	NM_024819	2337.44	2577.29	2082.6	0.808061	-0.307463	0.84036	-0.250921	0.0111819	0.0393339
TRCN0000078714	CDS	chr17	43100706:43138477	-	DCAKD	NM_024819	2316.35	2355.96	2274.26	0.965323	-0.0509161	0.963546	-0.0535739	0.42156	0.517626
TRCN0000078717	CDS	chr17	43100706:43138477	-	DCAKD	NM_024819	1040.11	1041.84	1038.27	0.99657	-0.00495752	1.00309	0.00444717	0.959168	0.972935
TRCN0000009932	CDS	chr4	71859265:71896629	+	DCK	NM_000788	5738.68	5443.03	6052.81	1.11203	0.153196	1.14531	0.195742	0.00304477	0.0208963
TRCN0000009934	CDS	chr4	71859265:71896629	+	DCK	NM_000788	2121.99	2032.81	2216.74	1.09048	0.124964	1.0994	0.136717	0.0801433	0.145079
TRCN0000009933	CDS	chr4	71859265:71896629	+	DCK	NM_000788	4909.81	5218.02	4582.34	0.878176	-0.187419	0.894299	-0.161171	0.0901128	0.15694
TRCN0000002146	3UTR	chr13	36342789:36705514	-	DCLK1	NM_004734	400.63	343.146	461.706	1.34551	0.428152	1.3484	0.431249	0.000789527	0.012969
TRCN0000002148	CDS	chr13	36342789:36705514	-	DCLK1	NM_004734	593.621	554.067	635.647	1.14724	0.198166	1.14279	0.192566	0.0335692	0.077742
TRCN0000002144	CDS	chr13	36342789:36705514	-	DCLK1	NM_004734	1697.54	1946.91	1432.57	0.735818	-0.442578	0.740742	-0.432957	8.49189e-05	0.00689909
TRCN0000002147	CDS	chr13	36342789:36705514	-	DCLK1	NM_004734	1668.43	1724.29	1609.08	0.933185	-0.0997648	0.94083	-0.0879938	0.379492	0.476305
TRCN0000001974	3UTR	chr4	150999426:151178608	+	DCLK2	NM_152619	1288.34	1175.68	1408.03	1.19763	0.260181	1.19041	0.25146	0.00376806	0.0223592
TRCN0000001970	CDS	chr4	150999426:151178608	+	DCLK2	NM_152619	641.457	601.008	684.434	1.13881	0.187528	1.14364	0.193631	0.0499531	0.102849
TRCN0000001973	CDS	chr4	150999426:151178608	+	DCLK2	NM_152619	847.96	823.736	873.697	1.06065	0.0849496	1.07766	0.107898	0.214162	0.305105
TRCN0000021555	CDS	chr3	36753913:36781352	-	DCLK3	XM_047355	2357.78	2126.44	2603.58	1.22438	0.292055	1.23672	0.306515	0.00363186	0.0220676
TRCN0000021556	CDS	chr3	36753913:36781352	-	DCLK3	XM_047355	3648.14	3556.84	3745.15	1.05294	0.0744248	1.06013	0.0842348	0.145526	0.227465
TRCN0000021558	CDS	chr3	36753913:36781352	-	DCLK3	XM_047355	714.845	694.947	735.986	1.05905	0.0827766	1.07065	0.0984894	0.239065	0.33378
TRCN0000021554	3UTR	chr3	36753913:36781352	-	DCLK3	XM_047355	928.724	935.718	921.293	0.984585	-0.022413	0.984971	-0.0218462	0.782474	0.840153
TRCN0000000617	CDS	chr6	30851861:30867933	+	DDR1	NM_001954	1250.7	1233.33	1269.16	1.02905	0.0413145	1.05372	0.0754861	0.311401	0.410737
TRCN0000000616	3UTR	chr6	30851861:30867933	+	DDR1	NM_001954	547.025	627.499	461.52	0.735492	-0.443219	0.803217	-0.316139	0.0164033	0.0489577
TRCN0000055436	CDS	chr6	30851861:30867933	+	DDR1	NM_001954	1887.38	2000.26	1767.45	0.883614	-0.178512	0.890675	-0.167029	0.0298279	0.07173
TRCN0000000618	CDS	chr6	30851861:30867933	+	DDR1	NM_001954	1226.35	1264.64	1185.67	0.937556	-0.0930235	0.931532	-0.102322	0.276504	0.374289
TRCN0000001418	CDS	chr1	162602228:162750247	+	DDR2	NM_006182	1110.14	986.938	1241.03	1.25746	0.330511	1.23232	0.301381	0.0203562	0.055882
TRCN0000001417	CDS	chr1	162602228:162750247	+	DDR2	NM_006182	125.276	123.495	127.168	1.02974	0.0422853	0.904415	-0.144943	0.202041	0.291847
TRCN0000001419	CDS	chr1	162602228:162750247	+	DDR2	NM_006182	1788.7	1775.45	1802.78	1.01539	0.0220325	1.02266	0.0323239	0.657921	0.737401
TRCN0000001421	CDS	chr1	162602228:162750247	+	DDR2	NM_006182	634.751	677.849	588.96	0.868867	-0.202793	0.887674	-0.171899	0.0494219	0.102035
TRCN0000001420	CDS	chr1	162602228:162750247	+	DDR2	NM_006182	2973.8	3124.14	2814.06	0.900746	-0.150808	0.906435	-0.141724	0.0799078	0.144875
TRCN0000006078	3UTR	chr12	56324946:56347807	+	DGKA	NM_001345	1110.42	998.989	1228.81	1.23005	0.298723	1.26178	0.335458	0.00849672	0.0334308
TRCN0000006080	CDS	chr12	56324946:56347807	+	DGKA	NM_001345	887.143	856.723	919.464	1.07323	0.101965	1.06139	0.0859505	0.282127	0.379622
TRCN0000006079	CDS	chr12	56324946:56347807	+	DGKA	NM_001345	1967.57	2219.39	1700.01	0.765979	-0.384624	0.787801	-0.344097	2.72768e-05	0.00602125
TRCN0000006081	CDS	chr12	56324946:56347807	+	DGKA	NM_001345	2155.29	2243.24	2061.85	0.919139	-0.121645	0.918056	-0.123347	0.103647	0.174894
TRCN0000006082	CDS	chr12	56324946:56347807	+	DGKA	NM_001345	877.966	904.232	850.059	0.94009	-0.0891289	0.945259	-0.081219	0.300936	0.398683
TRCN0000000767	CDS	chr7	14184674:14881075	-	DGKB	NM_004080	2054.4	1920.05	2197.15	1.14432	0.194486	1.1579	0.211514	0.0238294	0.0619646
TRCN0000000768	CDS	chr7	14184674:14881075	-	DGKB	NM_004080	2075.94	2304.11	1833.5	0.795748	-0.329616	0.827547	-0.273088	0.00508137	0.0256304
TRCN0000000765	CDS	chr7	14184674:14881075	-	DGKB	NM_004080	998.015	1095.49	894.451	0.816488	-0.292497	0.822863	-0.281276	0.00585979	0.0276849
TRCN0000000766	CDS	chr7	14184674:14881075	-	DGKB	NM_004080	7504.57	7872.73	7113.4	0.90355	-0.146323	0.901196	-0.150087	0.0171943	0.0502295
TRCN0000000674	CDS	chr2	234263153:234380743	+	DGKD	NM_003648	887.225	816.725	962.131	1.17803	0.236382	1.15958	0.213597	0.0418296	0.0914151
TRCN0000000672	CDS	chr2	234263153:234380743	+	DGKD	NM_003648	914.6	875.022	956.652	1.09329	0.128676	1.10695	0.146588	0.155712	0.239422
TRCN0000000671	3UTR	chr2	234263153:234380743	+	DGKD	NM_003648	585.466	548.94	624.275	1.13724	0.185533	1.1183	0.16131	0.180652	0.2683
TRCN0000000675	CDS	chr2	234263153:234380743	+	DGKD	NM_003648	404.857	402.05	407.839	1.0144	0.0206271	1.01215	0.017422	0.89338	0.926354
TRCN0000006084	CDS	chr17	54911460:54946036	+	DGKE	NM_003647	1593.16	1403.65	1794.51	1.27846	0.354406	1.28325	0.359805	0.000497877	0.0113451
TRCN0000006085	CDS	chr17	54911460:54946036	+	DGKE	NM_003647	1939.36	2035.02	1837.72	0.903049	-0.147124	0.895248	-0.15964	0.0107045	0.0381706
TRCN0000006087	CDS	chr17	54911460:54946036	+	DGKE	NM_003647	4909.7	5072.6	4736.61	0.933765	-0.0988685	0.937187	-0.0935914	0.0648213	0.124189
TRCN0000006083	3UTR	chr17	54911460:54946036	+	DGKE	NM_003647	3239.74	3317.41	3157.21	0.951709	-0.0714071	0.950084	-0.0738734	0.207989	0.29829
TRCN0000006086	CDS	chr17	54911460:54946036	+	DGKE	NM_003647	2736.83	2788.02	2682.44	0.962133	-0.0556925	0.966024	-0.0498687	0.509502	0.603929
TRCN0000000518	CDS	chr3	185864990:186080023	-	DGKG	NM_001346	1148.07	1080.71	1219.64	1.12855	0.17447	1.12575	0.17089	0.0534278	0.107788
TRCN0000000516	CDS	chr3	185864990:186080023	-	DGKG	NM_001346	676.931	645.273	710.567	1.10119	0.139061	1.0791	0.109833	0.266529	0.364966
TRCN0000000514	3UTR	chr3	185864990:186080023	-	DGKG	NM_001346	1008.49	1047.79	966.724	0.922631	-0.116175	0.916827	-0.125279	0.218228	0.309285
TRCN0000000517	CDS	chr3	185864990:186080023	-	DGKG	NM_001346	3114.28	3132.73	3094.67	0.98785	-0.0176355	0.983603	-0.0238516	0.689927	0.765849
TRCN0000001358	CDS	chr13	42614172:42803891	+	DGKH	NM_152910	1783.78	1781.27	1786.45	1.00291	0.00419132	0.99557	-0.00640547	0.937266	0.955332
TRCN0000001359	CDS	chr13	42614172:42803891	+	DGKH	NM_152910	1632.79	1771.64	1485.27	0.838361	-0.254357	0.855394	-0.225339	0.013567	0.0435711
TRCN0000001357	3UTR	chr13	42614172:42803891	+	DGKH	NM_152910	978.703	1034.3	919.628	0.889129	-0.169536	0.891166	-0.166234	0.0991724	0.168925
TRCN0000001360	CDS	chr13	42614172:42803891	+	DGKH	NM_152910	1020.54	1038.07	1001.92	0.965172	-0.0511426	0.978383	-0.0315286	0.72942	0.798775
TRCN0000001361	CDS	chr13	42614172:42803891	+	DGKH	NM_152910	926.376	927.646	925.028	0.997178	-0.00407709	0.990753	-0.0134031	0.873745	0.911338
TRCN0000006089	CDS	chr7	137074385:137531609	-	DGKI	NM_004717	1161.9	1143.93	1180.99	1.0324	0.045999	1.02696	0.0383802	0.590534	0.677795
TRCN0000006091	CDS	chr7	137074385:137531609	-	DGKI	NM_004717	1866.34	2001.48	1722.76	0.860743	-0.216345	0.876109	-0.190817	0.0234431	0.0613316
TRCN0000006090	CDS	chr7	137074385:137531609	-	DGKI	NM_004717	1252.03	1256.42	1247.36	0.992794	-0.0104332	1.00378	0.00544876	0.938081	0.955564
TRCN0000052543	CDS	chrX	50108406:50213737	-	DGKK	XM_066534	2843.65	2667.53	3030.77	1.13617	0.18418	1.14081	0.190058	0.00185177	0.0168197
TRCN0000052545	CDS	chrX	50108406:50213737	-	DGKK	XM_066534	810.962	754.84	870.592	1.15335	0.205826	1.1575	0.211016	0.0188645	0.0532939
TRCN0000052547	CDS	chrX	50108406:50213737	-	DGKK	XM_066534	504.246	492.043	517.211	1.05115	0.0719683	1.0646	0.0903132	0.309937	0.409166
TRCN0000052546	CDS	chrX	50108406:50213737	-	DGKK	XM_066534	1909.33	2010.91	1801.39	0.895805	-0.158743	0.906269	-0.141988	0.0541208	0.108603
TRCN0000052544	CDS	chrX	50108406:50213737	-	DGKK	XM_066534	1159.96	1204.58	1112.55	0.923602	-0.114657	0.907848	-0.139477	0.0688994	0.129932
TRCN0000006092	3UTR	chr4	952672:967348	-	DGKQ	NM_001347	2613.87	2903.35	2306.3	0.79436	-0.332135	0.820904	-0.284714	0.00248539	0.0189154
TRCN0000006094	CDS	chr4	952672:967348	-	DGKQ	NM_001347	3090.86	3188.17	2987.47	0.937048	-0.0938059	0.932476	-0.100861	0.0718389	0.133963
TRCN0000006093	CDS	chr4	952672:967348	-	DGKQ	NM_001347	2451.65	2591.83	2302.72	0.888451	-0.170636	0.906044	-0.142348	0.0736051	0.136193
TRCN0000006095	CDS	chr4	952672:967348	-	DGKQ	NM_001347	1462.2	1473.88	1449.79	0.983651	-0.0237812	0.975694	-0.0354986	0.619058	0.702488
TRCN0000000669	CDS	chr11	46354455:46402104	+	DGKZ	NM_003646	2636.42	2587.44	2688.47	1.03905	0.0552614	1.04417	0.0623557	0.367777	0.465064
TRCN0000000668	CDS	chr11	46354455:46402104	+	DGKZ	NM_003646	2307.05	2274.97	2341.14	1.02909	0.0413674	1.03358	0.0476552	0.473408	0.566532
TRCN0000000670	CDS	chr11	46354455:46402104	+	DGKZ	NM_003646	1428.65	1494.34	1358.85	0.909334	-0.137118	0.899129	-0.1534	0.0321499	0.0753254
TRCN0000006075	CDS	chr2	74153953:74186088	+	DGUOK	NM_001929	947.015	852.263	1047.69	1.2293	0.297839	1.25733	0.330367	0.00357468	0.0218849
TRCN0000006074	3UTR	chr2	74153953:74186088	+	DGUOK	NM_001929	1681.52	1601.64	1766.39	1.10286	0.141252	1.10383	0.142518	0.0717527	0.133923
TRCN0000006076	CDS	chr2	74153953:74186088	+	DGUOK	NM_001929	2477.51	2402.46	2557.26	1.06443	0.090087	1.08571	0.118637	0.0993209	0.168925
TRCN0000006077	CDS	chr2	74153953:74186088	+	DGUOK	NM_001929	2104.97	2088.16	2122.84	1.01661	0.0237679	1.01393	0.0199525	0.73292	0.800837
TRCN0000000815	CDS	chr19	46272967:46285815	-	DMPK	NM_004409	1058.11	927.549	1196.83	1.29031	0.367717	1.31465	0.39468	0.00312282	0.0211646
TRCN0000000813	CDS	chr19	46272967:46285815	-	DMPK	NM_004409	650.833	591.185	714.209	1.2081	0.272736	1.2037	0.267471	0.0402807	0.0888363
TRCN0000000816	CDS	chr19	46272967:46285815	-	DMPK	NM_004409	4915.56	5501.02	4293.51	0.780493	-0.357542	0.795239	-0.330539	0.000849315	0.013109
TRCN0000000814	CDS	chr19	46272967:46285815	-	DMPK	NM_004409	3433.13	3555.41	3303.21	0.929065	-0.106149	0.921711	-0.117614	0.0610041	0.118309
TRCN0000037513	CDS	chr1	205111631:205180727	-	DSTYK	NM_015375	1560.18	1373.54	1758.49	1.28026	0.35644	1.29433	0.372207	0.000813107	0.013109
TRCN0000037511	CDS	chr1	205111631:205180727	-	DSTYK	NM_015375	1885.44	1730.34	2050.23	1.18487	0.244727	1.21965	0.286467	0.00619792	0.0285506
TRCN0000037512	CDS	chr1	205111631:205180727	-	DSTYK	NM_015375	2333.63	2207.22	2467.93	1.11812	0.161071	1.12944	0.17561	0.00842286	0.0333585
TRCN0000037509	CDS	chr1	205111631:205180727	-	DSTYK	NM_015375	3613.71	3590.17	3638.73	1.01353	0.0193832	1.01668	0.0238671	0.716746	0.78863
TRCN0000037510	CDS	chr1	205111631:205180727	-	DSTYK	NM_015375	3830.09	3881.13	3775.86	0.972877	-0.0396708	0.977957	-0.0321572	0.605712	0.690471
TRCN0000006394	3UTR	chr2	242615157:242626383	-	DTYMK	NM_012145	1662.25	1396.44	1944.68	1.3926	0.477784	1.37042	0.454619	0.000529718	0.0114566
TRCN0000006396	CDS	chr2	242615157:242626383	-	DTYMK	NM_012145	2015.63	1825.64	2217.49	1.21464	0.28053	1.20999	0.274999	0.0174998	0.0508256
TRCN0000006395	CDS	chr2	242615157:242626383	-	DTYMK	NM_012145	2871.04	2947.56	2789.74	0.946459	-0.0793882	0.951565	-0.0716253	0.310452	0.409666
TRCN0000006397	CDS	chr2	242615157:242626383	-	DTYMK	NM_012145	3646.43	3679.5	3611.29	0.981463	-0.0269937	0.97104	-0.0423968	0.373899	0.470859
TRCN0000000525	CDS	chr21	38739859:38887679	+	DYRK1A	NM_001396	645.499	546.13	751.078	1.37527	0.459718	1.36241	0.446163	0.00104774	0.0134021
TRCN0000000524	CDS	chr21	38739859:38887679	+	DYRK1A	NM_001396	540.266	494.821	588.552	1.18943	0.250265	1.16803	0.224074	0.0962337	0.165208
TRCN0000000526	CDS	chr21	38739859:38887679	+	DYRK1A	NM_001396	2948.19	2892.91	3006.92	1.03941	0.0557666	1.03972	0.0561895	0.301703	0.399524
TRCN0000000527	CDS	chr21	38739859:38887679	+	DYRK1A	NM_001396	158.165	163.528	152.468	0.932364	-0.101035	1.03313	0.0470216	0.760435	0.823439
TRCN0000000523	3UTR	chr21	38739859:38887679	+	DYRK1A	NM_001396	85.7861	88.2742	83.1426	0.941868	-0.0864025	0.981806	-0.0264903	0.862584	0.90283
TRCN0000002140	3UTR	chr19	40315990:40324841	-	DYRK1B	NM_004714	612.357	597.571	628.067	1.05103	0.0718074	1.03381	0.0479771	0.647711	0.72922
TRCN0000002139	CDS	chr19	40315990:40324841	-	DYRK1B	NM_004714	1993.29	2148.97	1827.88	0.850582	-0.233478	0.852086	-0.230929	0.00496443	0.0252363
TRCN0000002142	CDS	chr19	40315990:40324841	-	DYRK1B	NM_004714	5199.89	5426.92	4958.66	0.913716	-0.130182	0.91389	-0.129907	0.0152316	0.0469121
TRCN0000002143	CDS	chr19	40315990:40324841	-	DYRK1B	NM_004714	2345.55	2497.47	2184.14	0.87454	-0.193404	0.880365	-0.183826	0.0346471	0.0793013
TRCN0000002141	CDS	chr19	40315990:40324841	-	DYRK1B	NM_004714	6055.71	6281.87	5815.41	0.925745	-0.111313	0.935534	-0.096138	0.250623	0.346378
TRCN0000000650	3UTR	chr12	68042512:68056444	+	DYRK2	NM_003583	1283.93	1155.66	1420.21	1.22892	0.297388	1.25366	0.326149	0.00076595	0.0127914
TRCN0000000652	CDS	chr12	68042512:68056444	+	DYRK2	NM_003583	2845	2785.68	2908.03	1.04392	0.0620146	1.04355	0.0614976	0.313536	0.41283
TRCN0000000653	CDS	chr12	68042512:68056444	+	DYRK2	NM_003583	6989.6	7233.52	6730.44	0.930452	-0.103996	0.920612	-0.119335	0.0694232	0.130756
TRCN0000000654	CDS	chr12	68042512:68056444	+	DYRK2	NM_003583	4598.13	4821.62	4360.68	0.904401	-0.144966	0.916057	-0.126491	0.0829839	0.148305
TRCN0000000651	CDS	chr12	68042512:68056444	+	DYRK2	NM_003583	1905.08	1980.1	1825.37	0.921855	-0.117388	0.930488	-0.103941	0.170146	0.256159
TRCN0000000648	CDS	chr1	206808881:206822542	+	DYRK3	NM_003582	2199.67	2080.32	2326.49	1.11834	0.161354	1.12295	0.167292	0.00818612	0.0330746
TRCN0000000646	3UTR	chr1	206808881:206822542	+	DYRK3	NM_003582	2654.06	2853.3	2442.38	0.855984	-0.224344	0.857783	-0.221315	0.00145994	0.0157059
TRCN0000000647	CDS	chr1	206808881:206822542	+	DYRK3	NM_003582	2229.96	2387.25	2062.83	0.864105	-0.210722	0.885577	-0.17531	0.0321089	0.0752882
TRCN0000000649	CDS	chr1	206808881:206822542	+	DYRK3	NM_003582	1117.69	1171.92	1060.07	0.90456	-0.144712	0.896399	-0.157787	0.100361	0.170252
TRCN0000000710	3UTR	chr12	4699238:4723054	+	DYRK4	NM_003845	1554.39	1455.32	1659.65	1.1404	0.189534	1.14687	0.197697	0.0271291	0.06755
TRCN0000000713	CDS	chr12	4699238:4723054	+	DYRK4	NM_003845	760.534	709.538	814.718	1.14824	0.19942	1.15537	0.208359	0.0278344	0.0683735
TRCN0000000712	CDS	chr12	4699238:4723054	+	DYRK4	NM_003845	2568.62	2786.01	2337.65	0.839068	-0.25314	0.839552	-0.252308	7.13135e-05	0.00686112
TRCN0000006221	3UTR	chr16	22217592:22300066	+	EEF2K	NM_013302	966.164	895.565	1041.18	1.16259	0.217344	1.18452	0.2443	0.0141468	0.0446693
TRCN0000006223	CDS	chr16	22217592:22300066	+	EEF2K	NM_013302	5956.21	5773.57	6150.26	1.06524	0.0911843	1.08061	0.111848	0.0379874	0.0850463
TRCN0000006224	CDS	chr16	22217592:22300066	+	EEF2K	NM_013302	3421.73	3584.86	3248.4	0.906144	-0.142188	0.907093	-0.140678	0.0204712	0.0560952
TRCN0000006222	CDS	chr16	22217592:22300066	+	EEF2K	NM_013302	5221.3	5364.78	5068.86	0.944841	-0.0818561	0.939194	-0.0905043	0.0779647	0.142469
TRCN0000006225	CDS	chr16	22217592:22300066	+	EEF2K	NM_013302	9187.7	9519.72	8834.93	0.928066	-0.107701	0.926273	-0.110491	0.0795906	0.144395
TRCN0000039637	CDS	chr7	55086725:55275031	+	EGFR	NM_005228	4787.66	4692.73	4888.51	1.04172	0.0589678	1.0569	0.0798447	0.123857	0.200916
TRCN0000039633	3UTR	chr7	55086725:55275031	+	EGFR	NM_005228	3112.39	3434.29	2770.38	0.806682	-0.309929	0.817228	-0.291189	0.00098928	0.0132573
TRCN0000039636	CDS	chr7	55086725:55275031	+	EGFR	NM_005228	2782.45	3048.44	2499.84	0.82004	-0.286234	0.828001	-0.272296	0.0126159	0.0419508
TRCN0000039635	CDS	chr7	55086725:55275031	+	EGFR	NM_005228	1327.49	1374.81	1277.21	0.929014	-0.106228	0.924372	-0.113455	0.0774729	0.141657
TRCN0000039634	CDS	chr7	55086725:55275031	+	EGFR	NM_005228	2511.41	2691.53	2320.03	0.861974	-0.214283	0.88651	-0.173791	0.119249	0.194922
TRCN0000010230	CDS	chr7	6061878:6098860	-	EIF2AK1	NM_014413	2919.62	2640.43	3216.26	1.21808	0.28461	1.23439	0.303802	0.00011185	0.00747158
TRCN0000010231	CDS	chr7	6061878:6098860	-	EIF2AK1	NM_014413	2530.24	2266.73	2810.21	1.23977	0.310067	1.25782	0.330931	0.000456219	0.0109711
TRCN0000010233	CDS	chr7	6061878:6098860	-	EIF2AK1	NM_014413	7562.58	7207.33	7940.02	1.10166	0.139679	1.11738	0.160114	0.0215997	0.0581277
TRCN0000010229	CDS	chr7	6061878:6098860	-	EIF2AK1	NM_014413	11012.1	11514	10478.9	0.910103	-0.135898	0.912245	-0.132508	0.017824	0.0513207
TRCN0000010232	CDS	chr7	6061878:6098860	-	EIF2AK1	NM_014413	1250.79	1276.6	1223.36	0.958293	-0.061462	0.926166	-0.110657	0.250495	0.34636
TRCN0000001381	CDS	chr2	37332284:37384190	-	EIF2AK2	NM_002759	1208.24	1124.73	1296.97	1.15314	0.205566	1.1776	0.235853	0.0184661	0.0525156
TRCN0000001379	3UTR	chr2	37332284:37384190	-	EIF2AK2	NM_002759	450.29	405.991	497.359	1.22505	0.292839	1.19676	0.259138	0.0801652	0.145079
TRCN0000001383	CDS	chr2	37332284:37384190	-	EIF2AK2	NM_002759	2974.49	2863.82	3092.07	1.0797	0.110632	1.06595	0.0921381	0.136878	0.216784
TRCN0000001380	CDS	chr2	37332284:37384190	-	EIF2AK2	NM_002759	1145.33	1106.64	1186.45	1.07212	0.100468	1.09735	0.134028	0.145873	0.22779
TRCN0000001382	CDS	chr2	37332284:37384190	-	EIF2AK2	NM_002759	3017.8	3070.8	2961.49	0.964405	-0.0522891	0.970086	-0.043816	0.552334	0.645033
TRCN0000001401	CDS	chr2	88856259:88927094	-	EIF2AK3	NM_004836	1536.47	1473.25	1603.65	1.08852	0.122363	1.1122	0.153419	0.0709084	0.133039
TRCN0000001403	CDS	chr2	88856259:88927094	-	EIF2AK3	NM_004836	1291.6	1249.51	1336.32	1.06948	0.0969074	1.06899	0.0962524	0.154554	0.237885
TRCN0000001402	CDS	chr2	88856259:88927094	-	EIF2AK3	NM_004836	1584.65	1518.24	1655.21	1.09022	0.12462	1.07901	0.109708	0.338985	0.436024
TRCN0000001400	CDS	chr2	88856259:88927094	-	EIF2AK3	NM_004836	2993.38	2978.66	3009.03	1.01019	0.0146334	1.01063	0.0152528	0.806531	0.85851
TRCN0000001399	3UTR	chr2	88856259:88927094	-	EIF2AK3	NM_004836	3282.26	3469.06	3083.78	0.888939	-0.169843	0.892946	-0.163355	0.0020968	0.0177549
TRCN0000078650	CDS	chr15	40226325:40327797	+	EIF2AK4	XM_496066	1150.44	1014.77	1294.59	1.27575	0.351347	1.27648	0.352172	0.00025402	0.00977013
TRCN0000078649	CDS	chr15	40226325:40327797	+	EIF2AK4	XM_496066	660.052	718.246	598.22	0.83289	-0.263802	0.834769	-0.260552	0.0170248	0.050004
TRCN0000078652	CDS	chr15	40226325:40327797	+	EIF2AK4	XM_496066	1494.12	1597.13	1384.68	0.866983	-0.205925	0.872947	-0.196034	0.0272732	0.0677546
TRCN0000078651	CDS	chr15	40226325:40327797	+	EIF2AK4	XM_496066	1097.36	1144.88	1046.88	0.914404	-0.129097	0.90685	-0.141063	0.110943	0.184496
TRCN0000006402	CDS	chr7	143088205:143105985	-	EPHA1	NM_005232	2187.74	1859.25	2536.76	1.3644	0.448265	1.37326	0.4576	0.000302813	0.00991009
TRCN0000006398	3UTR	chr7	143088205:143105985	-	EPHA1	NM_005232	2013.93	1932.64	2100.3	1.08675	0.120021	1.10971	0.15018	0.0307265	0.0730726
TRCN0000006401	CDS	chr7	143088205:143105985	-	EPHA1	NM_005232	16624.1	17129.8	16086.7	0.939107	-0.090638	0.935908	-0.095562	0.0154011	0.0472404
TRCN0000006400	CDS	chr7	143088205:143105985	-	EPHA1	NM_005232	3226.87	3340.91	3105.7	0.929596	-0.105324	0.932676	-0.100553	0.127535	0.20523
TRCN0000006399	CDS	chr7	143088205:143105985	-	EPHA1	NM_005232	10383	10499.6	10259	0.977088	-0.0334389	0.975272	-0.036123	0.439013	0.535458
TRCN0000021387	CDS	chr1	38181646:38230824	-	EPHA10	NM_173641	1221.87	1143.9	1304.72	1.14058	0.189774	1.13153	0.178272	0.0904097	0.157366
TRCN0000021386	CDS	chr1	38181646:38230824	-	EPHA10	NM_173641	2755.08	2817.3	2688.96	0.954444	-0.0672671	0.958331	-0.0614037	0.317949	0.416927
TRCN0000021384	3UTR	chr1	38181646:38230824	-	EPHA10	NM_173641	1137.07	1146.48	1127.07	0.983068	-0.0246371	0.980956	-0.0277398	0.716535	0.78863
TRCN0000021385	CDS	chr1	38181646:38230824	-	EPHA10	NM_173641	2069.43	2075.82	2062.64	0.993649	-0.0091912	0.997377	-0.0037895	0.96268	0.975334
TRCN0000006406	CDS	chr1	16450832:16482582	-	EPHA2	NM_004431	9996.05	9592.12	10425.2	1.08685	0.120157	1.1114	0.152376	0.0306684	0.0729922
TRCN0000006405	CDS	chr1	16450832:16482582	-	EPHA2	NM_004431	10213.2	10962.6	9416.99	0.85901	-0.219253	0.854092	-0.227537	0.000893118	0.0131476
TRCN0000006404	CDS	chr1	16450832:16482582	-	EPHA2	NM_004431	18360.2	19884.8	16740.4	0.841868	-0.248334	0.84185	-0.248365	0.00203164	0.0175491
TRCN0000006407	CDS	chr1	16450832:16482582	-	EPHA2	NM_004431	6694.95	6792.6	6591.21	0.970351	-0.0434213	0.973326	-0.0390055	0.415462	0.511626
TRCN0000006403	3UTR	chr1	16450832:16482582	-	EPHA2	NM_004431	2471.49	2490.06	2451.76	0.984616	-0.0223663	0.995349	-0.00672542	0.899611	0.929608
TRCN0000006408	3UTR	chr3	89156674:89531284	+	EPHA3	NM_005233	3123.26	2821.14	3444.26	1.22087	0.287913	1.25655	0.329473	0.000854024	0.013109
TRCN0000006412	CDS	chr3	89156674:89531284	+	EPHA3	NM_005233	2165.79	2055.17	2283.32	1.11102	0.151879	1.13858	0.18724	0.0156068	0.0474935
TRCN0000006410	CDS	chr3	89156674:89531284	+	EPHA3	NM_005233	3539.61	3414.53	3672.5	1.07555	0.105077	1.08582	0.118789	0.0229118	0.0604147
TRCN0000006409	CDS	chr3	89156674:89531284	+	EPHA3	NM_005233	8096.79	7745.33	8470.23	1.09359	0.129075	1.10499	0.144037	0.034972	0.0797615
TRCN0000006411	CDS	chr3	89156674:89531284	+	EPHA3	NM_005233	1934.32	1946.81	1921.04	0.986766	-0.0192203	0.992733	-0.0105221	0.883466	0.918927
TRCN0000010164	CDS	chr2	222282747:222437010	-	EPHA4	NM_004438	4298.57	4155.57	4450.51	1.07098	0.098925	1.0782	0.108623	0.0388099	0.0864808
TRCN0000010165	CDS	chr2	222282747:222437010	-	EPHA4	NM_004438	6504.74	6880.63	6105.35	0.887324	-0.172467	0.881693	-0.181651	0.00136223	0.0150546
TRCN0000010161	CDS	chr2	222282747:222437010	-	EPHA4	NM_004438	8284.52	8811.59	7724.5	0.876629	-0.189962	0.874402	-0.193631	0.00218916	0.0179308
TRCN0000010153	CDS	chr2	222282747:222437010	-	EPHA4	NM_004438	9945.35	10041.6	9843.11	0.980235	-0.0287998	0.984256	-0.0228941	0.583566	0.670822
TRCN0000006413	3UTR	chr4	66185281:66536213	-	EPHA5	NM_004439	5495	5043.42	5974.81	1.18467	0.244489	1.17367	0.231027	0.00172366	0.0164601
TRCN0000006417	CDS	chr4	66185281:66536213	-	EPHA5	NM_004439	2331.44	2127.07	2548.58	1.19816	0.260823	1.2239	0.291482	0.0181769	0.0520876
TRCN0000006416	CDS	chr4	66185281:66536213	-	EPHA5	NM_004439	5588.64	5571.2	5607.16	1.00646	0.00928378	1.01711	0.0244811	0.644032	0.725622
TRCN0000006414	CDS	chr4	66185281:66536213	-	EPHA5	NM_004439	5274.96	5808.2	4708.4	0.810647	-0.302855	0.827802	-0.272643	0.00166411	0.0162241
TRCN0000006415	CDS	chr4	66185281:66536213	-	EPHA5	NM_004439	17602.3	19308.7	15789.3	0.817727	-0.290309	0.826936	-0.274152	0.0047914	0.025136
TRCN0000001770	CDS	chr3	96533425:97467786	+	EPHA6	NM_173655	456.187	373.248	544.309	1.4583	0.54429	1.405	0.49057	0.00114628	0.0137829
TRCN0000001769	3UTR	chr3	96533425:97467786	+	EPHA6	NM_173655	609.043	561.284	659.787	1.17549	0.233267	1.21065	0.275788	0.031197	0.0735001
TRCN0000001767	CDS	chr3	96533425:97467786	+	EPHA6	NM_173655	785.266	751.997	820.614	1.09125	0.125976	1.09708	0.133664	0.158975	0.243132
TRCN0000001768	CDS	chr3	96533425:97467786	+	EPHA6	NM_173655	1497.02	1462.14	1534.07	1.04919	0.0692817	1.05366	0.0754088	0.281091	0.378566
TRCN0000001771	CDS	chr3	96533425:97467786	+	EPHA6	NM_173655	1404.76	1414.41	1394.51	0.985929	-0.0204446	0.975098	-0.0363804	0.651081	0.73239
TRCN0000006418	3UTR	chr6	93949740:94129300	-	EPHA7	NM_004440	5304.25	4601.73	6050.68	1.31487	0.394921	1.28781	0.364918	0.000545009	0.0114566
TRCN0000006419	CDS	chr6	93949740:94129300	-	EPHA7	NM_004440	3229.88	3036.89	3434.95	1.13108	0.177695	1.12288	0.167206	0.00370615	0.0221647
TRCN0000006421	CDS	chr6	93949740:94129300	-	EPHA7	NM_004440	2716.85	2584.02	2857.99	1.10603	0.145386	1.12253	0.166758	0.00677051	0.0298857
TRCN0000006420	CDS	chr6	93949740:94129300	-	EPHA7	NM_004440	6499.4	6946.72	6024.11	0.867188	-0.205583	0.86588	-0.207761	0.00497003	0.0252363
TRCN0000001345	3UTR	chr1	22890004:22930087	+	EPHA8	NM_020526	702.816	618.166	792.756	1.28243	0.358881	1.29148	0.369021	0.00335715	0.0215093
TRCN0000001349	CDS	chr1	22890004:22930087	+	EPHA8	NM_020526	1397.26	1345.35	1452.42	1.07958	0.110473	1.08735	0.120819	0.0366508	0.0825261
TRCN0000001346	CDS	chr1	22890004:22930087	+	EPHA8	NM_020526	611.229	649.495	570.571	0.878484	-0.186912	0.890092	-0.167973	0.17097	0.256968
TRCN0000001347	CDS	chr1	22890004:22930087	+	EPHA8	NM_020526	1692.48	1764.84	1615.59	0.91543	-0.127479	0.929325	-0.105746	0.289617	0.386454
TRCN0000001348	CDS	chr1	22890004:22930087	+	EPHA8	NM_020526	1501.96	1529.83	1472.35	0.962425	-0.0552547	0.962333	-0.0553921	0.518876	0.612384
TRCN0000000817	3UTR	chr3	134514099:134979307	+	EPHB1	NM_004441	781.688	667.465	903.051	1.35296	0.436115	1.33657	0.418532	0.00323981	0.0212365
TRCN0000000819	CDS	chr3	134514099:134979307	+	EPHB1	NM_004441	4977.41	5358.55	4572.44	0.853298	-0.228879	0.862954	-0.212645	0.0438623	0.0941114
TRCN0000000820	CDS	chr3	134514099:134979307	+	EPHB1	NM_004441	3905.81	3985.93	3820.69	0.958545	-0.0610818	0.959522	-0.0596129	0.270247	0.367584
TRCN0000000821	CDS	chr3	134514099:134979307	+	EPHB1	NM_004441	3316.87	3381.4	3248.3	0.960637	-0.0579371	0.966143	-0.0496907	0.482194	0.575875
TRCN0000006424	CDS	chr1	23037331:23241823	+	EPHB2	NM_004442	9630.09	8991.63	10308.4	1.14645	0.197173	1.15485	0.207709	0.00460001	0.0247216
TRCN0000006426	CDS	chr1	23037331:23241823	+	EPHB2	NM_004442	2754.87	2603.62	2915.57	1.11981	0.163259	1.13455	0.182121	0.00711891	0.0305454
TRCN0000006423	CDS	chr1	23037331:23241823	+	EPHB2	NM_004442	12626.5	13543.2	11652.5	0.860395	-0.21693	0.871109	-0.199075	0.00511267	0.0256304
TRCN0000006425	CDS	chr1	23037331:23241823	+	EPHB2	NM_004442	3980.91	4042.42	3915.55	0.968614	-0.0460058	0.969642	-0.0444754	0.418278	0.514251
TRCN0000006422	3UTR	chr1	23037331:23241823	+	EPHB2	NM_004442	2818.9	2852.59	2783.11	0.975642	-0.0355766	0.969373	-0.0448758	0.466469	0.560658
TRCN0000006429	CDS	chr3	184279587:184300196	+	EPHB3	NM_004443	5239.11	4838.42	5664.84	1.1708	0.2275	1.19799	0.260611	0.00183667	0.0168197
TRCN0000006427	3UTR	chr3	184279587:184300196	+	EPHB3	NM_004443	2990.21	2870.62	3117.28	1.08593	0.118928	1.11951	0.162873	0.0125153	0.04182
TRCN0000006428	CDS	chr3	184279587:184300196	+	EPHB3	NM_004443	4966.09	4819.99	5121.31	1.06251	0.0874828	1.05994	0.08398	0.092579	0.160399
TRCN0000006430	CDS	chr3	184279587:184300196	+	EPHB3	NM_004443	5059.24	4976.81	5146.81	1.03416	0.0484585	1.02813	0.0400222	0.404769	0.501953
TRCN0000001775	3UTR	chr7	100400187:100425143	-	EPHB4	NM_004444	2024.49	1949.87	2103.78	1.07893	0.109607	1.10969	0.150163	0.0783852	0.142989
TRCN0000001772	CDS	chr7	100400187:100425143	-	EPHB4	NM_004444	1932.81	1924.7	1941.43	1.00869	0.0124833	1.02371	0.0338079	0.544975	0.637926
TRCN0000001773	CDS	chr7	100400187:100425143	-	EPHB4	NM_004444	6013.68	6526.75	5468.54	0.837866	-0.255208	0.846914	-0.239713	0.0140568	0.0445595
TRCN0000001774	CDS	chr7	100400187:100425143	-	EPHB4	NM_004444	3995.8	4090.85	3894.82	0.95208	-0.070845	0.955152	-0.0661977	0.169251	0.255278
TRCN0000002018	CDS	chr7	142552776:142568847	+	EPHB6	NM_004445	1039.34	933.973	1151.3	1.23269	0.301807	1.26196	0.335672	0.00151273	0.0157265
TRCN0000002017	CDS	chr7	142552776:142568847	+	EPHB6	NM_004445	467.569	399.921	539.445	1.34888	0.431761	1.28623	0.363154	0.00793671	0.0323071
TRCN0000002016	CDS	chr7	142552776:142568847	+	EPHB6	NM_004445	1699.01	1688.75	1709.9	1.01253	0.0179607	1.03264	0.0463399	0.544354	0.637447
TRCN0000039880	CDS	chr17	37844337:37884915	+	ERBB2	NM_004448	2580.84	2444.09	2726.13	1.11539	0.157552	1.13145	0.178171	0.0223783	0.0594649
TRCN0000039878	3UTR	chr17	37844337:37884915	+	ERBB2	NM_004448	1885.19	1827.59	1946.39	1.06501	0.0908613	1.0918	0.126708	0.0347843	0.0795146
TRCN0000039879	CDS	chr17	37844337:37884915	+	ERBB2	NM_004448	2468.69	2667.02	2257.96	0.846621	-0.240211	0.851076	-0.23264	0.00217894	0.0179308
TRCN0000039881	CDS	chr17	37844337:37884915	+	ERBB2	NM_004448	2491.91	2495.43	2488.17	0.997093	-0.00419977	1.00061	0.000881677	0.987351	0.990316
TRCN0000000619	3UTR	chr12	56473809:56497291	+	ERBB3	NM_001982	552.099	475.584	633.396	1.33183	0.413408	1.38319	0.468001	0.000326233	0.0101099
TRCN0000000623	CDS	chr12	56473809:56497291	+	ERBB3	NM_001982	587.123	535.476	641.999	1.19893	0.261748	1.22946	0.298027	0.0127801	0.0421564
TRCN0000040108	CDS	chr12	56473809:56497291	+	ERBB3	NM_001982	5459.14	5263.13	5667.41	1.07681	0.10677	1.07792	0.108251	0.0598452	0.116815
TRCN0000040112	CDS	chr12	56473809:56497291	+	ERBB3	NM_001982	2733.21	2724.69	2742.25	1.00644	0.00926734	1.03149	0.0447253	0.487767	0.581605
TRCN0000000621	CDS	chr12	56473809:56497291	+	ERBB3	NM_001982	1019.37	1125.46	906.658	0.805589	-0.311884	0.808871	-0.306019	0.00382809	0.0226075
TRCN0000040111	CDS	chr12	56473809:56497291	+	ERBB3	NM_001982	4441.12	4700.92	4165.08	0.886014	-0.174599	0.893815	-0.161952	0.0592083	0.11582
TRCN0000040109	CDS	chr12	56473809:56497291	+	ERBB3	NM_001982	4847.64	4940.48	4749	0.961243	-0.0570264	0.961269	-0.0569874	0.325246	0.422694
TRCN0000000620	CDS	chr12	56473809:56497291	+	ERBB3	NM_001982	28.0512	31.6814	24.194	0.763666	-0.388987	0.963133	-0.0541929	0.611806	0.695307
TRCN0000000622	CDS	chr12	56473809:56497291	+	ERBB3	NM_001982	2727.38	2752.68	2700.49	0.981039	-0.0276178	0.990486	-0.0137911	0.833599	0.879845
TRCN0000039692	CDS	chr2	212240442:213403352	-	ERBB4	NM_005235	1920	1726.37	2125.73	1.23133	0.300222	1.24287	0.313673	0.00575016	0.0274038
TRCN0000039691	CDS	chr2	212240442:213403352	-	ERBB4	NM_005235	2915.22	3104.38	2714.22	0.874319	-0.193768	0.885318	-0.175733	0.0274988	0.0681462
TRCN0000039689	CDS	chr2	212240442:213403352	-	ERBB4	NM_005235	2774.29	2817.6	2728.28	0.9683	-0.0464734	0.973903	-0.0381507	0.577235	0.665651
TRCN0000000528	3UTR	chr17	62120390:62207502	-	ERN1	NM_001433	1261.18	1186.62	1340.4	1.1296	0.175807	1.12188	0.165914	0.0287993	0.0699844
TRCN0000000529	CDS	chr17	62120390:62207502	-	ERN1	NM_001433	368.822	355.06	383.444	1.07994	0.110953	1.09935	0.136649	0.175118	0.262415
TRCN0000000530	CDS	chr17	62120390:62207502	-	ERN1	NM_001433	2041.48	2127.49	1950.1	0.916622	-0.1256	0.90761	-0.139855	0.0352438	0.0801991
TRCN0000000531	CDS	chr17	62120390:62207502	-	ERN1	NM_001433	2183.36	2290.19	2069.86	0.903795	-0.145932	0.912137	-0.132678	0.128366	0.20627
TRCN0000000532	CDS	chr17	62120390:62207502	-	ERN1	NM_001433	380.102	383.06	376.958	0.984071	-0.0231653	0.998072	-0.00278485	0.981538	0.987741
TRCN0000010243	CDS	chr12	22778076:22843608	+	ETNK1	NM_018638	843.441	808.918	880.121	1.08802	0.121707	1.10202	0.140148	0.0848217	0.150427
TRCN0000010247	CDS	chr12	22778076:22843608	+	ETNK1	NM_018638	2129.93	2062.06	2202.05	1.06789	0.0947611	1.07414	0.103188	0.11088	0.184496
TRCN0000010245	CDS	chr12	22778076:22843608	+	ETNK1	NM_018638	3402.99	3317.16	3494.18	1.05337	0.0750084	1.05545	0.0778642	0.203075	0.292778
TRCN0000010244	CDS	chr12	22778076:22843608	+	ETNK1	NM_018638	569.794	606.519	530.773	0.875114	-0.192457	0.826727	-0.274517	0.0399361	0.0882705
TRCN0000010246	CDS	chr12	22778076:22843608	+	ETNK1	NM_018638	1507.42	1588.79	1420.95	0.894359	-0.161073	0.915337	-0.127624	0.151479	0.234352
TRCN0000052576	CDS	chr1	204100190:204121307	-	ETNK2	NM_018208	1943.67	2124.59	1751.45	0.824373	-0.278632	0.835797	-0.258776	0.00442298	0.0242467
TRCN0000052575	CDS	chr1	204100190:204121307	-	ETNK2	NM_018208	1468.02	1570.13	1359.53	0.86587	-0.207777	0.860031	-0.21754	0.0170339	0.050004
TRCN0000052573	CDS	chr1	204100190:204121307	-	ETNK2	NM_018208	1005.87	1059.3	949.093	0.895963	-0.158489	0.888698	-0.170234	0.0439373	0.0942051
TRCN0000052577	CDS	chr1	204100190:204121307	-	ETNK2	NM_018208	1992.77	2093.97	1885.25	0.900322	-0.151488	0.917097	-0.124854	0.0894385	0.156128
TRCN0000052574	CDS	chr1	204100190:204121307	-	ETNK2	NM_018208	1149.02	1171.93	1124.67	0.959678	-0.059377	0.976257	-0.0346669	0.680158	0.756402
TRCN0000006318	CDS	chr7	150773708:150777970	-	FASTK	NM_006712	1329.32	1180.91	1487	1.2592	0.332505	1.29565	0.373677	0.00113265	0.0137279
TRCN0000006322	CDS	chr7	150773708:150777970	-	FASTK	NM_006712	2084.94	1916.31	2264.12	1.1815	0.240619	1.2006	0.26376	0.0126478	0.0420102
TRCN0000006321	CDS	chr7	150773708:150777970	-	FASTK	NM_006712	294.22	280.521	308.776	1.10072	0.138453	1.10037	0.137983	0.292095	0.389374
TRCN0000006319	CDS	chr7	150773708:150777970	-	FASTK	NM_006712	6654.61	7092.29	6189.58	0.872719	-0.196411	0.883502	-0.178695	0.0214008	0.0577477
TRCN0000006320	CDS	chr7	150773708:150777970	-	FASTK	NM_006712	1920.4	1984.43	1852.36	0.933443	-0.0993665	0.909817	-0.136352	0.0578903	0.114287
TRCN0000002349	CDS	chr5	108083523:108523373	+	FER	NM_005246	2023.73	1942.6	2109.93	1.08614	0.119204	1.10159	0.139584	0.0503837	0.103452
TRCN0000002347	CDS	chr5	108083523:108523373	+	FER	NM_005246	4463.31	4932.92	3964.34	0.803649	-0.315363	0.822647	-0.281654	0.000904102	0.0131476
TRCN0000002350	CDS	chr5	108083523:108523373	+	FER	NM_005246	3234.07	3453.95	3000.45	0.868699	-0.203071	0.877552	-0.188444	0.012915	0.042229
TRCN0000002348	CDS	chr5	108083523:108523373	+	FER	NM_005246	3730.98	4006.6	3438.13	0.858115	-0.220757	0.869276	-0.202113	0.0257999	0.0652267
TRCN0000000625	CDS	chr15	91427665:91439006	+	FES	NM_002005	783.834	691.271	882.182	1.27617	0.351824	1.26715	0.34159	0.00470627	0.0249915
TRCN0000000624	CDS	chr15	91427665:91439006	+	FES	NM_002005	895.273	869.652	922.496	1.06077	0.0851059	1.03372	0.0478387	0.53752	0.631659
TRCN0000000627	CDS	chr15	91427665:91439006	+	FES	NM_002005	1504.01	1546.79	1458.57	0.942966	-0.0847219	0.944895	-0.0817746	0.331599	0.428861
TRCN0000000626	CDS	chr15	91427665:91439006	+	FES	NM_002005	1012.51	1025.22	999.001	0.974427	-0.0373745	0.99227	-0.0111948	0.903051	0.932522
TRCN0000000418	CDS	chr8	38268656:38326352	-	FGFR1	NM_000604	1726.81	1556.8	1907.44	1.22523	0.293057	1.22952	0.298096	0.00183393	0.0168197
TRCN0000000419	CDS	chr8	38268656:38326352	-	FGFR1	NM_000604	1727.83	1707.49	1749.43	1.02456	0.0350096	1.00149	0.00214742	0.98471	0.988657
TRCN0000000421	CDS	chr8	38268656:38326352	-	FGFR1	NM_000604	2566.48	2732.3	2390.28	0.874823	-0.192937	0.897629	-0.155808	0.103123	0.174248
TRCN0000000369	CDS	chr10	123237844:123357972	-	FGFR2	NM_000141	1442.04	1426.8	1458.24	1.02203	0.0314417	1.03188	0.0452805	0.605561	0.690471
TRCN0000000368	CDS	chr10	123237844:123357972	-	FGFR2	NM_000141	3482.99	3937.39	3000.19	0.761972	-0.392189	0.781624	-0.355454	0.000196548	0.009211
TRCN0000000366	3UTR	chr10	123237844:123357972	-	FGFR2	NM_000141	1980.56	2069.31	1886.26	0.911538	-0.133625	0.904773	-0.144372	0.07162	0.133841
TRCN0000000367	CDS	chr10	123237844:123357972	-	FGFR2	NM_000141	1614.81	1665.63	1560.82	0.937077	-0.0937604	0.947251	-0.0781818	0.286992	0.384325
TRCN0000000370	CDS	chr10	123237844:123357972	-	FGFR2	NM_000141	1410.99	1429.32	1391.51	0.973551	-0.0386719	0.994093	-0.00854787	0.904749	0.933355
TRCN0000000371	3UTR	chr4	1795039:1810599	+	FGFR3	NM_000142	1294.79	1285.25	1304.93	1.01531	0.0219257	1.05054	0.0711247	0.399984	0.497663
TRCN0000000373	CDS	chr4	1795039:1810599	+	FGFR3	NM_000142	2314.4	2491.61	2126.11	0.853308	-0.228861	0.848728	-0.236625	0.00476976	0.0251069
TRCN0000000374	CDS	chr4	1795039:1810599	+	FGFR3	NM_000142	2022.8	2123.39	1915.93	0.902296	-0.148327	0.901268	-0.149972	0.0558008	0.111453
TRCN0000000372	CDS	chr4	1795039:1810599	+	FGFR3	NM_000142	813.078	843.928	780.301	0.924606	-0.113089	0.943676	-0.0836365	0.321166	0.419567
TRCN0000000630	CDS	chr5	176513873:176525143	+	FGFR4	NM_002011	1854.02	1806.92	1904.06	1.05376	0.0755478	1.0517	0.0727183	0.338557	0.435847
TRCN0000000628	CDS	chr5	176513873:176525143	+	FGFR4	NM_002011	1667.22	1742.06	1587.7	0.911396	-0.13385	0.897734	-0.15564	0.0343928	0.0789799
TRCN0000000629	CDS	chr5	176513873:176525143	+	FGFR4	NM_002011	2390.09	2527.83	2243.73	0.887613	-0.171998	0.882892	-0.179691	0.0445968	0.0950777
TRCN0000001593	3UTR	chr1	27938801:27961727	-	FGR	NM_005248	1907.98	1748.25	2077.71	1.18845	0.249082	1.20146	0.264787	0.00443119	0.0242467
TRCN0000001594	CDS	chr1	27938801:27961727	-	FGR	NM_005248	2603.32	2445.27	2771.24	1.13331	0.18054	1.14883	0.200161	0.00752268	0.0313028
TRCN0000001595	CDS	chr1	27938801:27961727	-	FGR	NM_005248	5134.14	5600.47	4638.67	0.828266	-0.271835	0.827891	-0.272488	0.00158985	0.0159836
TRCN0000001596	CDS	chr1	27938801:27961727	-	FGR	NM_005248	5621.52	5856.26	5372.11	0.917328	-0.12449	0.914378	-0.129137	0.111212	0.184595
TRCN0000001597	CDS	chr1	27938801:27961727	-	FGR	NM_005248	3397.19	3418.27	3374.79	0.987281	-0.0184676	0.999849	-0.000217459	0.997299	0.997963
TRCN0000037488	CDS	NA	NA:NA	NA	FLJ30698	XM_375602	2746.32	2594.36	2907.77	1.1208	0.164532	1.12407	0.168731	0.00597118	0.0280459
TRCN0000037485	CDS	NA	NA:NA	NA	FLJ30698	XM_375602	6888.66	6735.94	7050.93	1.04676	0.0659353	1.0462	0.0651641	0.0999892	0.169727
TRCN0000037487	CDS	NA	NA:NA	NA	FLJ30698	XM_375602	12408.3	12946.3	11836.6	0.914279	-0.129293	0.919691	-0.12078	0.0188792	0.0532939
TRCN0000037486	CDS	NA	NA:NA	NA	FLJ30698	XM_375602	1459.1	1549.14	1363.42	0.880115	-0.184236	0.88152	-0.181934	0.0669868	0.127076
TRCN0000037484	CDS	NA	NA:NA	NA	FLJ30698	XM_375602	15653.9	15678.7	15627.5	0.996735	-0.00471771	0.999279	-0.001041	0.977188	0.985053
TRCN0000037476	CDS	NA	NA:NA	NA	FLJ40852	NM_173677	1798.42	1606.09	2002.77	1.24698	0.318444	1.26529	0.339471	0.00145482	0.0157059
TRCN0000037477	CDS	NA	NA:NA	NA	FLJ40852	NM_173677	2709.3	2577.43	2849.41	1.10552	0.14473	1.10614	0.14553	0.00658996	0.0295539
TRCN0000037475	CDS	NA	NA:NA	NA	FLJ40852	NM_173677	4923.03	4531.28	5339.25	1.17831	0.236719	1.18459	0.244387	0.00809308	0.0327868
TRCN0000037478	CDS	NA	NA:NA	NA	FLJ40852	NM_173677	2284.25	2116.63	2462.34	1.16333	0.218266	1.15948	0.21348	0.0245604	0.0631554
TRCN0000037474	CDS	NA	NA:NA	NA	FLJ40852	NM_173677	9578.01	10166.2	8953.01	0.880661	-0.183342	0.888479	-0.17059	0.0242756	0.062691
TRCN0000000632	CDS	chr13	28874483:29069265	-	FLT1	NM_002019	1990.75	1881.65	2106.66	1.11958	0.162955	1.12901	0.175057	0.00971982	0.0361368
TRCN0000000635	CDS	chr13	28874483:29069265	-	FLT1	NM_002019	1254.46	1168.1	1346.22	1.15249	0.204753	1.17401	0.23145	0.0237415	0.0618464
TRCN0000000634	CDS	chr13	28874483:29069265	-	FLT1	NM_002019	27.4955	25.7772	29.3212	1.13749	0.185849	1.02134	0.0304563	0.796959	0.851331
TRCN0000000633	CDS	chr13	28874483:29069265	-	FLT1	NM_002019	665.146	721.597	605.168	0.838651	-0.253857	0.87243	-0.196888	0.0852968	0.151002
TRCN0000000631	3UTR	chr13	28874483:29069265	-	FLT1	NM_002019	1048.86	1072.08	1024.19	0.955335	-0.0659206	0.9736	-0.0385983	0.675656	0.753125
TRCN0000039706	CDS	chr13	28577411:28674729	-	FLT3	NM_004119	1262.56	1164.49	1366.75	1.17369	0.231048	1.21452	0.280382	0.00321891	0.0212365
TRCN0000039703	CDS	chr13	28577411:28674729	-	FLT3	NM_004119	1910.23	1780.81	2047.74	1.14989	0.201499	1.16995	0.226452	0.00726754	0.0307261
TRCN0000039707	CDS	chr13	28577411:28674729	-	FLT3	NM_004119	4827.35	4751.38	4908.07	1.03298	0.0468089	1.03207	0.0455357	0.353166	0.450793
TRCN0000039705	CDS	chr13	28577411:28674729	-	FLT3	NM_004119	2370.25	2543.13	2186.57	0.859796	-0.217934	0.864181	-0.210595	0.00272276	0.0194409
TRCN0000000636	CDS	chr5	180028506:180076624	-	FLT4	NM_002020	399.67	365.347	436.138	1.19376	0.255518	1.23193	0.300925	0.00482127	0.025156
TRCN0000000638	CDS	chr5	180028506:180076624	-	FLT4	NM_002020	2110.11	2359.45	1845.18	0.782036	-0.354693	0.803251	-0.316077	0.00511897	0.0256304
TRCN0000000639	CDS	chr5	180028506:180076624	-	FLT4	NM_002020	2223.59	2301.28	2141.05	0.930372	-0.10412	0.928829	-0.106514	0.223056	0.314644
TRCN0000000640	CDS	chr5	180028506:180076624	-	FLT4	NM_002020	887.564	913.728	859.765	0.940942	-0.0878219	0.929196	-0.105945	0.22516	0.317165
TRCN0000000637	CDS	chr5	180028506:180076624	-	FLT4	NM_002020	1699.73	1745.62	1650.97	0.945781	-0.0804226	0.950788	-0.0728046	0.428645	0.525064
TRCN0000037659	CDS	chr17	80693452:80709073	+	FN3K	NM_022158	982.92	845.35	1129.09	1.33564	0.417535	1.31972	0.400237	0.00440007	0.0242467
TRCN0000037660	CDS	chr17	80693452:80709073	+	FN3K	NM_022158	2951.58	2557.18	3370.63	1.3181	0.398462	1.2766	0.352303	0.0103189	0.0373871
TRCN0000037663	CDS	chr17	80693452:80709073	+	FN3K	NM_022158	2861.09	2799.78	2926.23	1.04516	0.0637277	1.05417	0.0761089	0.275522	0.373745
TRCN0000037661	CDS	chr17	80693452:80709073	+	FN3K	NM_022158	2149.93	2114.65	2187.41	1.03441	0.0488051	1.03169	0.0450157	0.39874	0.496651
TRCN0000037662	CDS	chr17	80693452:80709073	+	FN3K	NM_022158	4013.66	3954.97	4076.01	1.03061	0.0434917	1.02842	0.0404275	0.400412	0.497989
TRCN0000052551	CDS	chr17	80674582:80685893	+	FN3KRP	NM_024619	634.563	571.718	701.335	1.22671	0.294799	1.25779	0.330887	0.00574837	0.0274038
TRCN0000052550	CDS	chr17	80674582:80685893	+	FN3KRP	NM_024619	1490.97	1633.92	1339.08	0.819553	-0.287091	0.829628	-0.269463	0.00317779	0.0211748
TRCN0000052549	CDS	chr17	80674582:80685893	+	FN3KRP	NM_024619	1245.75	1326.51	1159.93	0.874426	-0.193592	0.871802	-0.197928	0.0157089	0.0476314
TRCN0000052552	CDS	chr17	80674582:80685893	+	FN3KRP	NM_024619	3875.39	4032.28	3708.7	0.919753	-0.120682	0.907218	-0.140479	0.0257628	0.0652006
TRCN0000052548	CDS	chr17	80674582:80685893	+	FN3KRP	NM_024619	747.75	750.709	744.606	0.991871	-0.0117761	1.01319	0.0189095	0.841832	0.886978
TRCN0000010095	CDS	chr6	116262693:116381921	-	FRK	NM_002031	2283.85	2090.99	2488.77	1.19024	0.251251	1.24051	0.310933	0.00963142	0.0359207
TRCN0000010098	CDS	chr6	116262693:116381921	-	FRK	NM_002031	2203.58	2122.25	2289.99	1.07904	0.109745	1.08777	0.121378	0.173018	0.259526
TRCN0000010096	CDS	chr6	116262693:116381921	-	FRK	NM_002031	5233.35	5484.75	4966.23	0.905462	-0.143275	0.901917	-0.148933	0.000390435	0.0105579
TRCN0000010097	CDS	chr6	116262693:116381921	-	FRK	NM_002031	5607.25	6123.69	5058.53	0.826059	-0.275684	0.837481	-0.255871	0.003907	0.0228027
TRCN0000037857	CDS	chr16	70488498:70514177	+	FUK	NM_145059	1416.12	1225.02	1619.17	1.32175	0.402447	1.32197	0.402686	0.000860277	0.0131269
TRCN0000037858	CDS	chr16	70488498:70514177	+	FUK	NM_145059	633.658	627.903	639.773	1.0189	0.0270178	1.02877	0.0409184	0.654103	0.735041
TRCN0000037855	CDS	chr16	70488498:70514177	+	FUK	NM_145059	3334.14	3604.9	3046.45	0.845085	-0.242831	0.862012	-0.21422	0.0257679	0.0652006
TRCN0000037854	CDS	chr16	70488498:70514177	+	FUK	NM_145059	2396.94	2532.51	2252.9	0.889592	-0.168785	0.89946	-0.15287	0.0670863	0.127151
TRCN0000037856	CDS	chr16	70488498:70514177	+	FUK	NM_145059	1449.88	1465.81	1432.95	0.977583	-0.0327085	0.960519	-0.0581133	0.353824	0.451441
TRCN0000003099	CDS	chr6	111981535:112194655	-	FYN	NM_002037	3569.5	3160.99	4003.54	1.26654	0.340898	1.27715	0.352926	0.00920635	0.0348543
TRCN0000003101	3UTR	chr6	111981535:112194655	-	FYN	NM_002037	924.265	899.486	950.593	1.05682	0.0797267	1.07296	0.101594	0.195665	0.284003
TRCN0000003097	CDS	chr6	111981535:112194655	-	FYN	NM_002037	2847.2	2803.42	2893.72	1.03221	0.0457412	1.0294	0.0418078	0.463149	0.558006
TRCN0000003100	CDS	chr6	111981535:112194655	-	FYN	NM_002037	2772.53	2807.87	2734.98	0.974043	-0.0379429	0.981991	-0.0262178	0.618044	0.701867
TRCN0000003098	CDS	chr6	111981535:112194655	-	FYN	NM_002037	707.892	708.001	707.777	0.999684	-0.000456542	1.02818	0.0400956	0.678074	0.754923
TRCN0000002157	CDS	chr4	843065:926178	-	GAK	NM_005255	582.184	488.617	681.599	1.39496	0.480219	1.3603	0.443929	0.00151569	0.0157265
TRCN0000002155	CDS	chr4	843065:926178	-	GAK	NM_005255	684.171	671.075	698.086	1.04025	0.0569316	1.07589	0.105532	0.287029	0.384325
TRCN0000002154	CDS	chr4	843065:926178	-	GAK	NM_005255	2469	2445.54	2493.93	1.01979	0.0282708	1.01288	0.0184617	0.794458	0.850175
TRCN0000002156	CDS	chr4	843065:926178	-	GAK	NM_005255	1186.82	1244.53	1125.5	0.904359	-0.145033	0.90479	-0.144345	0.0444315	0.0949651
TRCN0000002158	3UTR	chr4	843065:926178	-	GAK	NM_005255	768.344	768.764	767.899	0.998875	-0.00162444	1.03062	0.0435156	0.701856	0.77594
TRCN0000010060	CDS	chr17	73754018:73761280	-	GALK1	NM_000154	14019	15344.9	12610.2	0.821785	-0.283167	0.831722	-0.265827	0.00217602	0.0179308
TRCN0000010059	CDS	chr17	73754018:73761280	-	GALK1	NM_000154	5934.11	6294.68	5551	0.881857	-0.181383	0.888835	-0.170012	0.0047178	0.0249915
TRCN0000010057	CDS	chr17	73754018:73761280	-	GALK1	NM_000154	6300.56	6607.85	5974.06	0.904086	-0.145468	0.915634	-0.127158	0.0812179	0.146543
TRCN0000010058	CDS	chr17	73754018:73761280	-	GALK1	NM_000154	4456.19	4541.2	4365.85	0.961387	-0.0568111	0.967805	-0.0472124	0.403826	0.501197
TRCN0000010093	CDS	chr15	49447956:49622002	+	GALK2	NM_002044	4176.42	3627.51	4759.64	1.3121	0.391873	1.32564	0.406692	0.000363356	0.0104839
TRCN0000010100	CDS	chr15	49447956:49622002	+	GALK2	NM_002044	3806.37	3768.09	3847.03	1.02095	0.0299098	1.01911	0.0273099	0.600676	0.686291
TRCN0000010092	CDS	chr15	49447956:49622002	+	GALK2	NM_002044	6071.44	6653.38	5453.13	0.819604	-0.287002	0.820194	-0.285963	0.000484166	0.0113451
TRCN0000010099	CDS	chr15	49447956:49622002	+	GALK2	NM_002044	5024.2	5431.69	4591.25	0.84527	-0.242516	0.862249	-0.213824	0.0151166	0.0467977
TRCN0000010270	CDS	chr7	44183870:44229022	-	GCK	NM_033507	1391.86	1520.34	1255.35	0.825702	-0.276308	0.818873	-0.288289	0.000130888	0.00802518
TRCN0000010269	CDS	chr7	44183870:44229022	-	GCK	NM_033507	2474.18	2568.59	2373.87	0.924194	-0.113732	0.921788	-0.117493	0.161251	0.245728
TRCN0000010267	CDS	chr7	44183870:44229022	-	GCK	NM_033507	856.623	869.261	843.195	0.970014	-0.0439224	0.957801	-0.0622018	0.503214	0.597889
TRCN0000010268	CDS	chr7	44183870:44229022	-	GCK	NM_033507	305.758	318.386	292.34	0.918193	-0.123131	0.960705	-0.0578345	0.668149	0.746638
TRCN0000037636	CDS	chrX	30671476:30749577	+	GK	NM_000167	1982.97	1804.3	2172.81	1.20424	0.268126	1.2256	0.293492	0.00254125	0.01904
TRCN0000037638	CDS	chrX	30671476:30749577	+	GK	NM_000167	7255.61	7132.78	7386.12	1.03552	0.0503518	1.0413	0.0583876	0.133605	0.212609
TRCN0000037637	CDS	chrX	30671476:30749577	+	GK	NM_000167	4015.57	3917.81	4119.44	1.05146	0.0723988	1.05132	0.0722063	0.137344	0.217408
TRCN0000037635	CDS	chrX	30671476:30749577	+	GK	NM_000167	3595.8	3656.69	3531.11	0.965658	-0.0504161	0.955374	-0.065863	0.22662	0.318624
TRCN0000037634	CDS	chrX	30671476:30749577	+	GK	NM_000167	5275.2	5288.52	5261.04	0.994803	-0.00751658	0.993523	-0.00937541	0.79126	0.84796
TRCN0000037648	CDS	chr4	80327507:80329372	-	GK2	NM_033214	1479.54	1366.87	1599.24	1.17	0.226505	1.19366	0.255387	0.0174529	0.0507658
TRCN0000037644	CDS	chr4	80327507:80329372	-	GK2	NM_033214	2020.59	1982.84	2060.71	1.03927	0.0555727	1.04936	0.0695044	0.326938	0.424578
TRCN0000037645	CDS	chr4	80327507:80329372	-	GK2	NM_033214	7268.26	7748.25	6758.27	0.872232	-0.197216	0.867452	-0.205143	0.00664542	0.0296382
TRCN0000037646	CDS	chr4	80327507:80329372	-	GK2	NM_033214	6091.91	6395.58	5769.27	0.902072	-0.148686	0.906932	-0.140934	0.0535975	0.107875
TRCN0000037647	CDS	chr4	80327507:80329372	-	GK2	NM_033214	25.9227	26.2397	25.5858	0.975077	-0.0364112	0.99583	-0.00602837	0.957899	0.972128
TRCN0000006168	3UTR	chr9	36214439:36277053	-	GNE	NM_005476	2032.34	1891.95	2181.51	1.15305	0.205456	1.19791	0.260516	0.00391424	0.0228027
TRCN0000006172	CDS	chr9	36214439:36277053	-	GNE	NM_005476	6035.84	5723.79	6367.4	1.11245	0.153735	1.11957	0.162939	0.00549428	0.0266637
TRCN0000006169	CDS	chr9	36214439:36277053	-	GNE	NM_005476	2261.88	2127.68	2404.47	1.13009	0.176437	1.14453	0.19475	0.0435499	0.0937961
TRCN0000006171	CDS	chr9	36214439:36277053	-	GNE	NM_005476	2967.17	2857.01	3084.21	1.07952	0.110392	1.09945	0.136776	0.0493104	0.101944
TRCN0000006170	CDS	chr9	36214439:36277053	-	GNE	NM_005476	3753.68	3702.57	3807.99	1.02847	0.0405035	1.02784	0.0396089	0.591649	0.678556
TRCN0000001489	CDS	chr13	114321597:114438637	+	GRK1	NM_002929	4699.28	5065.81	4309.84	0.85077	-0.233159	0.850529	-0.233568	0.000627011	0.0120051
TRCN0000001487	CDS	chr13	114321597:114438637	+	GRK1	NM_002929	3223.13	3557.26	2868.11	0.806269	-0.310667	0.812217	-0.300063	0.00097915	0.0132573
TRCN0000001488	CDS	chr13	114321597:114438637	+	GRK1	NM_002929	1621.75	1741.3	1494.73	0.858398	-0.220281	0.861613	-0.214888	0.0431283	0.0933647
TRCN0000001486	CDS	chr13	114321597:114438637	+	GRK1	NM_002929	3829.47	3904.87	3749.36	0.960173	-0.0586331	0.957273	-0.062998	0.221596	0.31332
TRCN0000000987	CDS	chr4	2965343:3042474	+	GRK4	NM_005307	2180.37	2115.5	2249.31	1.06325	0.0884827	1.05708	0.0800832	0.0961621	0.165208
TRCN0000000988	CDS	chr4	2965343:3042474	+	GRK4	NM_005307	1299.02	1285.2	1313.7	1.02217	0.0316391	1.01598	0.0228746	0.794111	0.850106
TRCN0000000990	CDS	chr4	2965343:3042474	+	GRK4	NM_005307	1992.59	2061.43	1919.45	0.931123	-0.102957	0.937124	-0.0936883	0.197728	0.286582
TRCN0000000989	CDS	chr4	2965343:3042474	+	GRK4	NM_005307	1103.21	1129.61	1075.16	0.951803	-0.0712658	0.955538	-0.0656146	0.459168	0.554544
TRCN0000000986	CDS	chr4	2965343:3042474	+	GRK4	NM_005307	2657.28	2663.57	2650.59	0.995129	-0.00704385	1.00431	0.00620798	0.906306	0.934599
TRCN0000000840	CDS	chr10	120967197:121215131	+	GRK5	NM_005308	3972.25	4407.81	3509.47	0.796194	-0.328807	0.794234	-0.332364	3.0666e-05	0.00602125
TRCN0000000841	CDS	chr10	120967197:121215131	+	GRK5	NM_005308	9575.39	10168	8945.72	0.879789	-0.18477	0.88212	-0.180953	0.00777291	0.0321394
TRCN0000000842	CDS	chr10	120967197:121215131	+	GRK5	NM_005308	4678.07	4956.97	4381.73	0.883954	-0.177957	0.890193	-0.16781	0.0252663	0.0643649
TRCN0000000843	CDS	chr10	120967197:121215131	+	GRK5	NM_005308	5405.19	5539.71	5262.27	0.949919	-0.0741243	0.953207	-0.0691391	0.247444	0.343089
TRCN0000001368	CDS	chr5	176853687:176869850	+	GRK6	NM_002082	365.118	302.566	431.579	1.4264	0.512378	1.39183	0.47698	0.000210195	0.00923895
TRCN0000001369	CDS	chr5	176853687:176869850	+	GRK6	NM_002082	418.161	380.326	458.361	1.20518	0.269246	1.21762	0.284065	0.0138207	0.0440094
TRCN0000001367	CDS	chr5	176853687:176869850	+	GRK6	NM_002082	1550.77	1486.36	1619.21	1.08938	0.123505	1.1023	0.140516	0.116095	0.190864
TRCN0000002407	CDS	chr3	141497043:141535892	+	GRK7	NM_139209	1971.34	1955.5	1988.17	1.0167	0.0238993	1.03014	0.0428462	0.594836	0.681431
TRCN0000002408	CDS	chr3	141497043:141535892	+	GRK7	NM_139209	1027.4	1147.43	899.881	0.78426	-0.350596	0.79533	-0.330374	8.21692e-05	0.00686112
TRCN0000002409	CDS	chr3	141497043:141535892	+	GRK7	NM_139209	1061.82	1104.75	1016.2	0.919849	-0.120531	0.927461	-0.108642	0.22249	0.313993
TRCN0000002406	3UTR	chr3	141497043:141535892	+	GRK7	NM_139209	1391.4	1399.46	1382.84	0.988124	-0.0172367	1.00556	0.00800427	0.931182	0.951458
TRCN0000021530	CDS	chr17	3627197:3629992	+	GSG2	NM_031965	997.517	946.959	1051.23	1.11012	0.15071	1.12342	0.167898	0.0261769	0.0659135
TRCN0000021532	CDS	chr17	3627197:3629992	+	GSG2	NM_031965	4651.42	4538.34	4771.56	1.05139	0.0722943	1.0595	0.0833774	0.1488	0.231637
TRCN0000021529	3UTR	chr17	3627197:3629992	+	GSG2	NM_031965	1503.89	1530.02	1476.14	0.964785	-0.0517201	0.965377	-0.0508354	0.543063	0.636431
TRCN0000021531	CDS	chr17	3627197:3629992	+	GSG2	NM_031965	2009.4	2028.84	1988.74	0.980231	-0.0288057	0.98843	-0.0167887	0.765083	0.826685
TRCN0000038682	CDS	chr19	42734338:42746736	-	GSK3A	NM_019884	1038.67	903.765	1182.01	1.30787	0.387224	1.28152	0.357858	0.00119757	0.0140621
TRCN0000038681	CDS	chr19	42734338:42746736	-	GSK3A	NM_019884	429.587	393.727	467.69	1.18785	0.248357	1.23755	0.307485	0.0112271	0.03938
TRCN0000039765	CDS	chr19	42734338:42746736	-	GSK3A	NM_019884	1562.4	1383.96	1752	1.26593	0.340202	1.25607	0.328922	0.0133028	0.0429519
TRCN0000039763	CDS	chr19	42734338:42746736	-	GSK3A	NM_019884	3601.1	3528.42	3678.33	1.04249	0.0600276	1.01814	0.0259374	0.660903	0.740191
TRCN0000039764	CDS	chr19	42734338:42746736	-	GSK3A	NM_019884	1303.82	1299.29	1308.63	1.00718	0.0103256	1.01511	0.0216328	0.778004	0.836737
TRCN0000038679	3UTR	chr19	42734338:42746736	-	GSK3A	NM_019884	2651.45	2760.72	2535.34	0.91836	-0.122869	0.915133	-0.127947	0.0189546	0.0532998
TRCN0000038680	CDS	chr19	42734338:42746736	-	GSK3A	NM_019884	2378.97	2478.61	2273.09	0.917083	-0.124875	0.914888	-0.128333	0.0549353	0.109944
TRCN0000039767	CDS	chr19	42734338:42746736	-	GSK3A	NM_019884	3180.16	3283.61	3070.25	0.935022	-0.0969276	0.939504	-0.0900282	0.19828	0.287243
TRCN0000039766	CDS	chr19	42734338:42746736	-	GSK3A	NM_019884	4066.33	4124.85	4004.14	0.970737	-0.0428478	0.95867	-0.0608942	0.320238	0.418901
TRCN0000039999	CDS	chr3	119540802:119813264	-	GSK3B	NM_002093	1957.8	1782.62	2143.93	1.20269	0.266261	1.20635	0.270645	0.000757194	0.0127914
TRCN0000040001	CDS	chr3	119540802:119813264	-	GSK3B	NM_002093	420.629	488.403	348.619	0.713794	-0.486421	0.737553	-0.439182	0.0014129	0.0153681
TRCN0000039998	CDS	chr3	119540802:119813264	-	GSK3B	NM_002093	9037.96	9314.72	8743.91	0.938719	-0.0912344	0.938832	-0.0910607	0.0394738	0.0875877
TRCN0000040002	CDS	chr3	119540802:119813264	-	GSK3B	NM_002093	4572.09	4572.87	4571.27	0.999651	-0.000503255	0.990397	-0.0139214	0.830694	0.877395
TRCN0000002022	CDS	chr12	14765568:14849519	-	GUCY2C	NM_004963	4510.29	4961.65	4030.73	0.812377	-0.299778	0.82199	-0.282808	0.000872755	0.0131476
TRCN0000002023	CDS	chr12	14765568:14849519	-	GUCY2C	NM_004963	3258.05	3578.79	2917.26	0.815152	-0.294859	0.827227	-0.273645	0.00346067	0.0217353
TRCN0000002021	CDS	chr12	14765568:14849519	-	GUCY2C	NM_004963	1590.92	1709.84	1464.57	0.856556	-0.223381	0.865133	-0.209007	0.0210435	0.0570911
TRCN0000002019	3UTR	chr12	14765568:14849519	-	GUCY2C	NM_004963	1316.16	1405.68	1221.03	0.868639	-0.203171	0.875436	-0.191926	0.0337277	0.0779107
TRCN0000000376	CDS	chr17	7905988:7923658	+	GUCY2D	NM_000180	701.018	662.462	741.985	1.12004	0.163552	1.19553	0.257652	0.0310014	0.0733203
TRCN0000000377	CDS	chr17	7905988:7923658	+	GUCY2D	NM_000180	760.572	740.55	781.845	1.05576	0.0782855	1.07583	0.105453	0.277151	0.374486
TRCN0000000375	3UTR	chr17	7905988:7923658	+	GUCY2D	NM_000180	2266.59	2479.26	2040.61	0.823072	-0.280909	0.84155	-0.248879	0.0226424	0.0599673
TRCN0000000378	CDS	chr17	7905988:7923658	+	GUCY2D	NM_000180	423.946	455.985	389.905	0.855084	-0.225862	0.864614	-0.209873	0.0590693	0.115751
TRCN0000000536	CDS	chrX	108616135:108725285	-	GUCY2F	NM_001522	1327.24	1215.09	1446.4	1.19037	0.251407	1.21737	0.283769	0.00140661	0.0153681
TRCN0000000537	CDS	chrX	108616135:108725285	-	GUCY2F	NM_001522	709.928	618.099	807.496	1.30642	0.385617	1.32272	0.403508	0.00250298	0.0189154
TRCN0000000535	CDS	chrX	108616135:108725285	-	GUCY2F	NM_001522	1196.59	1118.35	1279.71	1.14429	0.194451	1.15015	0.201822	0.0073054	0.0307995
TRCN0000000533	3UTR	chrX	108616135:108725285	-	GUCY2F	NM_001522	666.811	635.1	700.503	1.10298	0.141406	1.13581	0.18372	0.0264063	0.066203
TRCN0000000534	CDS	chrX	108616135:108725285	-	GUCY2F	NM_001522	2238.97	2337.12	2134.69	0.913388	-0.1307	0.916708	-0.125466	0.210977	0.301567
TRCN0000006117	CDS	chr1	228327785:228336655	+	GUK1	NM_000858	2721.02	2625.25	2822.77	1.07524	0.104657	1.07646	0.10629	0.12014	0.195952
TRCN0000006119	CDS	chr1	228327785:228336655	+	GUK1	NM_000858	2856.45	3079.74	2619.19	0.850458	-0.233688	0.848311	-0.237334	0.00469113	0.0249837
TRCN0000006118	CDS	chr1	228327785:228336655	+	GUK1	NM_000858	1033.33	1112.15	949.582	0.853822	-0.227993	0.871539	-0.198363	0.0492438	0.101877
TRCN0000006120	CDS	chr1	228327785:228336655	+	GUK1	NM_000858	2062.92	2116.81	2005.66	0.947494	-0.0778113	0.927942	-0.107893	0.091618	0.159193
TRCN0000006116	3UTR	chr1	228327785:228336655	+	GUK1	NM_000858	3143.07	3197.37	3085.37	0.964971	-0.0514425	0.968733	-0.0458285	0.37906	0.476162
TRCN0000009969	CDS	chr20	30639991:30689657	+	HCK	NM_002110	4720.62	5074.15	4344.99	0.856299	-0.223813	0.861576	-0.21495	0.0013554	0.0150546
TRCN0000009970	CDS	chr20	30639991:30689657	+	HCK	NM_002110	2719.17	2818.51	2613.62	0.927307	-0.108881	0.917142	-0.124783	0.0560482	0.111651
TRCN0000009971	CDS	chr20	30639991:30689657	+	HCK	NM_002110	3821.37	3954.47	3679.96	0.930583	-0.103794	0.951945	-0.0710502	0.436017	0.532575
TRCN0000009968	CDS	chr20	30639991:30689657	+	HCK	NM_002110	2570.56	2617.4	2520.79	0.96309	-0.0542579	0.978816	-0.0308899	0.600195	0.686002
TRCN0000009967	CDS	chr20	30639991:30689657	+	HCK	NM_002110	3041.78	3055.84	3026.84	0.990508	-0.0137591	0.993624	-0.0092278	0.878311	0.914595
TRCN0000007162	CDS	chr1	114471996:114520491	+	HIPK1	NM_152696	232.244	203.007	263.308	1.29704	0.375222	1.23657	0.306349	0.0209469	0.0569452
TRCN0000007165	CDS	chr1	114471996:114520491	+	HIPK1	NM_152696	3791.23	3703.61	3884.34	1.0488	0.0687374	1.06879	0.0959813	0.150346	0.233319
TRCN0000007164	CDS	chr1	114471996:114520491	+	HIPK1	NM_152696	3033.01	3002.51	3065.41	1.02095	0.029913	1.03774	0.0534443	0.472564	0.566398
TRCN0000007163	CDS	chr1	114471996:114520491	+	HIPK1	NM_152696	516.542	547.334	483.825	0.883966	-0.177937	0.920754	-0.119113	0.353124	0.450793
TRCN0000007161	CDS	chr1	114471996:114520491	+	HIPK1	NM_152696	1431.79	1463.33	1398.27	0.955534	-0.0656206	0.962654	-0.054911	0.415786	0.511744
TRCN0000003202	CDS	chr7	139246316:139477693	-	HIPK2	NM_022740	1313.69	1141.85	1496.27	1.31039	0.389993	1.30871	0.388146	2.63873e-05	0.00602125
TRCN0000003203	CDS	chr7	139246316:139477693	-	HIPK2	NM_022740	1917.68	2001.89	1828.21	0.913246	-0.130924	0.90967	-0.136586	0.0127743	0.0421564
TRCN0000003204	CDS	chr7	139246316:139477693	-	HIPK2	NM_022740	1180.96	1250.23	1107.36	0.885727	-0.175066	0.907968	-0.139286	0.17064	0.256729
TRCN0000003201	CDS	chr7	139246316:139477693	-	HIPK2	NM_022740	1587.09	1602.34	1570.89	0.980376	-0.0285931	0.982425	-0.0255811	0.710933	0.783478
TRCN0000003255	CDS	chr11	33278218:33378568	+	HIPK3	NM_005734	1433.57	1389.59	1480.3	1.06528	0.0912347	1.07963	0.110543	0.168826	0.254893
TRCN0000003254	CDS	chr11	33278218:33378568	+	HIPK3	NM_005734	6704.59	7150.72	6230.57	0.871321	-0.198723	0.875065	-0.192539	0.030503	0.0727714
TRCN0000003257	CDS	chr11	33278218:33378568	+	HIPK3	NM_005734	1336.63	1365.2	1306.28	0.95684	-0.0636497	0.945706	-0.0805356	0.40262	0.50009
TRCN0000003256	CDS	chr11	33278218:33378568	+	HIPK3	NM_005734	526.407	537.895	514.201	0.95595	-0.0649933	0.96752	-0.0476373	0.637323	0.719411
TRCN0000003258	CDS	chr11	33278218:33378568	+	HIPK3	NM_005734	2324.54	2327.45	2321.45	0.99742	-0.00372764	0.993792	-0.00898473	0.904071	0.933254
TRCN0000006996	3UTR	chr19	40885178:40896094	-	HIPK4	NM_144685	1767.55	1569.8	1977.67	1.25983	0.333224	1.27579	0.351392	0.00119477	0.0140621
TRCN0000006999	CDS	chr19	40885178:40896094	-	HIPK4	NM_144685	2944.81	2732.39	3170.5	1.16034	0.214549	1.18563	0.245651	0.00371583	0.0221647
TRCN0000006997	CDS	chr19	40885178:40896094	-	HIPK4	NM_144685	5207.01	4600.34	5851.61	1.272	0.347094	1.26364	0.337581	0.00972543	0.0361368
TRCN0000006998	CDS	chr19	40885178:40896094	-	HIPK4	NM_144685	4077.19	4049.25	4106.88	1.01423	0.0203888	1.00581	0.00836409	0.879143	0.915063
TRCN0000007000	CDS	chr19	40885178:40896094	-	HIPK4	NM_144685	2715.78	2825.86	2598.82	0.919654	-0.120837	0.925661	-0.111445	0.113002	0.186435
TRCN0000037658	CDS	chr10	71029756:71161637	+	HK1	NM_033498	7668.25	7041.08	8334.62	1.18371	0.243319	1.1908	0.25193	0.00110193	0.013498
TRCN0000037656	CDS	chr10	71029756:71161637	+	HK1	NM_033498	2748.21	2534.18	2975.61	1.17419	0.231665	1.18553	0.245532	0.0174624	0.0507658
TRCN0000037657	CDS	chr10	71029756:71161637	+	HK1	NM_033498	1836.96	1787.82	1889.17	1.05669	0.0795568	1.06036	0.084551	0.157866	0.241745
TRCN0000037654	CDS	chr10	71029756:71161637	+	HK1	NM_033498	4486.24	4774.13	4180.36	0.875627	-0.191611	0.866063	-0.207456	0.00238813	0.0186586
TRCN0000037655	CDS	chr10	71029756:71161637	+	HK1	NM_033498	3999.7	4198.5	3788.47	0.902338	-0.14826	0.903822	-0.145889	0.0116647	0.0403964
TRCN0000037670	CDS	chr2	75059782:75120481	+	HK2	NM_000189	1991.45	1708.9	2291.67	1.34102	0.423335	1.33226	0.413873	0.000342187	0.0101843
TRCN0000037671	CDS	chr2	75059782:75120481	+	HK2	NM_000189	2020.99	1895.42	2154.4	1.13664	0.184775	1.14616	0.196814	0.0125558	0.0418432
TRCN0000037672	CDS	chr2	75059782:75120481	+	HK2	NM_000189	3414.51	3406.52	3422.99	1.00483	0.00695849	1.02268	0.0323559	0.48007	0.573565
TRCN0000037673	CDS	chr2	75059782:75120481	+	HK2	NM_000189	11376.5	11957.9	10758.8	0.899724	-0.152446	0.895755	-0.158824	0.0264875	0.0663309
TRCN0000037680	CDS	chr5	176307870:176326333	-	HK3	NM_002115	583.979	514.444	657.859	1.27878	0.354765	1.26893	0.343613	0.0250837	0.0640082
TRCN0000037679	CDS	chr5	176307870:176326333	-	HK3	NM_002115	3617.04	3529.31	3710.26	1.05127	0.072131	1.04775	0.0672922	0.155032	0.238499
TRCN0000037681	CDS	chr5	176307870:176326333	-	HK3	NM_002115	7519.66	7504.41	7535.87	1.00419	0.00603465	1.0154	0.0220437	0.610192	0.693736
TRCN0000037683	CDS	chr5	176307870:176326333	-	HK3	NM_002115	2539.47	2653.7	2418.1	0.911219	-0.13413	0.915264	-0.12774	0.0556729	0.111272
TRCN0000037682	CDS	chr5	176307870:176326333	-	HK3	NM_002115	6964.1	7002.26	6923.56	0.988761	-0.0163066	0.983899	-0.0234174	0.674244	0.75233
TRCN0000078725	CDS	chr10	70980059:71027315	+	HKDC1	NM_025130	468.413	436.653	502.158	1.15002	0.201653	1.14821	0.199383	0.0394434	0.0875877
TRCN0000078724	CDS	chr10	70980059:71027315	+	HKDC1	NM_025130	1512.4	1508.05	1517.03	1.00596	0.00856657	1.01011	0.0145153	0.836527	0.882316
TRCN0000078727	CDS	chr10	70980059:71027315	+	HKDC1	NM_025130	2656.19	2791.99	2511.9	0.899681	-0.152515	0.897497	-0.156022	0.0429236	0.0931613
TRCN0000078726	CDS	chr10	70980059:71027315	+	HKDC1	NM_025130	1030.49	1077.9	980.119	0.909284	-0.137196	0.912252	-0.132495	0.115952	0.190864
TRCN0000078723	3UTR	chr10	70980059:71027315	+	HKDC1	NM_025130	1045.01	1077.63	1010.35	0.937565	-0.0930098	0.938043	-0.0922747	0.360738	0.458512
TRCN0000010218	CDS	chr12	119616595:119632551	+	HSPB8	NM_014365	4955.46	4651.93	5277.96	1.13457	0.18215	1.13769	0.186112	0.00217526	0.0179308
TRCN0000010226	CDS	chr12	119616595:119632551	+	HSPB8	NM_014365	2298.18	2069	2541.67	1.22845	0.296843	1.24719	0.318682	0.00290266	0.0202916
TRCN0000010219	CDS	chr12	119616595:119632551	+	HSPB8	NM_014365	5253.73	5696.06	4783.75	0.839834	-0.251824	0.855539	-0.225095	0.0253915	0.0645198
TRCN0000002268	CDS	chr21	33245628:33376377	+	HUNK	NM_014586	2856.46	2612.31	3115.87	1.19276	0.254304	1.22985	0.298479	0.00347959	0.0217353
TRCN0000002267	CDS	chr21	33245628:33376377	+	HUNK	NM_014586	1713.13	1634.31	1796.88	1.09947	0.136814	1.09151	0.126321	0.112142	0.185526
TRCN0000002271	3UTR	chr21	33245628:33376377	+	HUNK	NM_014586	16.4304	15.088	17.8567	1.18351	0.243071	1.04298	0.0607048	0.651376	0.73239
TRCN0000002269	CDS	chr21	33245628:33376377	+	HUNK	NM_014586	484.581	540.224	425.46	0.787563	-0.344533	0.815511	-0.294223	0.00991607	0.0366357
TRCN0000002270	CDS	chr21	33245628:33376377	+	HUNK	NM_014586	2767.88	2993.96	2527.68	0.844261	-0.24424	0.858742	-0.219704	0.0590398	0.115751
TRCN0000006325	CDS	chr6	52866098:52926600	-	ICK	NM_014920	998.841	901.512	1102.25	1.22267	0.290036	1.28852	0.36571	0.0071538	0.0305459
TRCN0000006323	3UTR	chr6	52866098:52926600	-	ICK	NM_014920	1343.88	1243.56	1450.48	1.16639	0.222055	1.21694	0.283255	0.0079362	0.0323071
TRCN0000006327	CDS	chr6	52866098:52926600	-	ICK	NM_014920	8548.2	8451.12	8651.35	1.02369	0.0337831	1.02708	0.0385491	0.251239	0.34707
TRCN0000006324	CDS	chr6	52866098:52926600	-	ICK	NM_014920	2195.98	2170.55	2223	1.02416	0.0344442	1.02187	0.0312133	0.655937	0.736008
TRCN0000006326	CDS	chr6	52866098:52926600	-	ICK	NM_014920	4055.28	4159.9	3944.12	0.948129	-0.0768451	0.935689	-0.0958992	0.190757	0.27917
TRCN0000039677	CDS	chr15	99191768:99507759	+	IGF1R	NM_000875	1214.43	1115.14	1319.92	1.18364	0.243227	1.22561	0.293501	0.0189036	0.0532939
TRCN0000039675	CDS	chr15	99191768:99507759	+	IGF1R	NM_000875	1391.78	1304.55	1484.45	1.1379	0.186375	1.13135	0.17804	0.0256195	0.0649891
TRCN0000039676	CDS	chr15	99191768:99507759	+	IGF1R	NM_000875	1660.51	1536.32	1792.47	1.16673	0.22247	1.15222	0.204421	0.0291962	0.0707201
TRCN0000039674	CDS	chr15	99191768:99507759	+	IGF1R	NM_000875	2378.68	2314.89	2446.47	1.05684	0.0797553	1.05861	0.0821726	0.180985	0.268662
TRCN0000018918	CDS	chr8	42128820:42190171	+	IKBKB	NM_001556	361.593	346.394	377.743	1.0905	0.124993	1.11319	0.154698	0.145007	0.22679
TRCN0000018917	CDS	chr8	42128820:42190171	+	IKBKB	NM_001556	1453.3	1416.54	1492.37	1.05353	0.0752358	1.05162	0.072613	0.402439	0.50009
TRCN0000018915	3UTR	chr8	42128820:42190171	+	IKBKB	NM_001556	3815.36	4282.72	3318.79	0.774925	-0.367871	0.800839	-0.320416	0.000133486	0.00802518
TRCN0000018919	CDS	chr8	42128820:42190171	+	IKBKB	NM_001556	1767.94	1839.06	1692.37	0.920236	-0.119925	0.910842	-0.134727	0.010379	0.0375123
TRCN0000018916	CDS	chr8	42128820:42190171	+	IKBKB	NM_001556	2258.53	2417.44	2089.68	0.864417	-0.210201	0.867411	-0.205212	0.0220879	0.0588454
TRCN0000010036	CDS	chr1	206643586:206670223	+	IKBKE	NM_014002	2369.86	2234.13	2514.08	1.12531	0.170317	1.11324	0.154766	0.00342885	0.0217353
TRCN0000010034	CDS	chr1	206643586:206670223	+	IKBKE	NM_014002	633.037	580.688	688.657	1.18593	0.246022	1.20474	0.268725	0.0265015	0.0663309
TRCN0000010027	CDS	chr1	206643586:206670223	+	IKBKE	NM_014002	2410.15	2547.27	2264.46	0.888976	-0.169784	0.900237	-0.151624	0.0661808	0.126151
TRCN0000010035	CDS	chr1	206643586:206670223	+	IKBKE	NM_014002	4164.91	4240.51	4084.57	0.963227	-0.0540521	0.964963	-0.0514544	0.562717	0.653604
TRCN0000000969	CDS	chr11	6624938:6632105	+	ILK	NM_004517	2343.17	2738.88	1922.74	0.702016	-0.510424	0.732368	-0.449359	1.24551e-05	0.00553144
TRCN0000000970	CDS	chr11	6624938:6632105	+	ILK	NM_004517	2281.49	2534.24	2012.94	0.7943	-0.332243	0.799605	-0.32264	0.000362032	0.0104839
TRCN0000000972	CDS	chr11	6624938:6632105	+	ILK	NM_004517	1842.17	1963.02	1713.77	0.873025	-0.195905	0.875301	-0.192149	0.0141458	0.0446693
TRCN0000000971	CDS	chr11	6624938:6632105	+	ILK	NM_004517	1966.71	2088.3	1837.52	0.879915	-0.184563	0.890657	-0.167059	0.0453089	0.0959145
TRCN0000039698	CDS	chr19	7112266:7294011	-	INSR	NM_000208	3990.53	3800.78	4192.13	1.10297	0.141388	1.11233	0.153581	0.0032849	0.0212863
TRCN0000039700	CDS	chr19	7112266:7294011	-	INSR	NM_000208	1599.88	1493.71	1712.68	1.14659	0.197353	1.17502	0.232688	0.0259094	0.0653935
TRCN0000039701	CDS	chr19	7112266:7294011	-	INSR	NM_000208	681.851	650.201	715.479	1.1004	0.138024	1.12896	0.174995	0.11913	0.194834
TRCN0000039702	CDS	chr19	7112266:7294011	-	INSR	NM_000208	1255.78	1304.14	1204.4	0.923516	-0.114791	0.919999	-0.120296	0.0559446	0.111524
TRCN0000039699	CDS	chr19	7112266:7294011	-	INSR	NM_000208	6331.32	6481.66	6171.59	0.952162	-0.0707218	0.956564	-0.0640661	0.0816365	0.147034
TRCN0000003187	CDS	chr1	156810665:156828712	-	INSRR	NM_014215	1627.35	1431.61	1835.32	1.282	0.358394	1.323	0.403814	0.00100223	0.0132573
TRCN0000003188	CDS	chr1	156810665:156828712	-	INSRR	NM_014215	1428.81	1419.05	1439.17	1.01418	0.0203121	1.00101	0.00145252	0.984371	0.988646
TRCN0000003190	CDS	chr1	156810665:156828712	-	INSRR	NM_014215	1533.16	1614.45	1446.8	0.89616	-0.158172	0.89389	-0.161831	0.0177634	0.0512445
TRCN0000013508	3UTR	chr3	49761728:49823973	-	IP6K1	NM_153273	505.83	451.269	563.801	1.24937	0.321199	1.25996	0.333377	0.00448386	0.0243294
TRCN0000013512	CDS	chr3	49761728:49823973	-	IP6K1	NM_153273	64.1155	55.3262	73.454	1.32765	0.408877	1.11756	0.160354	0.289776	0.386454
TRCN0000013510	CDS	chr3	49761728:49823973	-	IP6K1	NM_153273	2059.06	2277.49	1826.97	0.802185	-0.317994	0.814754	-0.295563	0.00219712	0.0179471
TRCN0000013509	CDS	chr3	49761728:49823973	-	IP6K1	NM_153273	112.482	139.843	83.4123	0.596473	-0.745471	0.835592	-0.25913	0.0847402	0.150371
TRCN0000006140	3UTR	chr3	48725436:48754711	-	IP6K2	NM_016291	342.918	304.976	383.23	1.25659	0.329514	1.29267	0.370354	0.0101434	0.0370658
TRCN0000006142	CDS	chr3	48725436:48754711	-	IP6K2	NM_016291	1885.21	1882.81	1887.76	1.00263	0.0037906	0.995178	-0.00697363	0.927534	0.949942
TRCN0000006144	CDS	chr3	48725436:48754711	-	IP6K2	NM_016291	1122.54	1235.57	1002.45	0.811326	-0.301647	0.825798	-0.27614	0.00221413	0.0179883
TRCN0000006143	CDS	chr3	48725436:48754711	-	IP6K2	NM_016291	841.946	895.668	784.866	0.876292	-0.190517	0.879624	-0.185042	0.0484681	0.100544
TRCN0000006141	CDS	chr3	48725436:48754711	-	IP6K2	NM_016291	961.158	1010.11	909.148	0.900049	-0.151924	0.908868	-0.137857	0.128055	0.205956
TRCN0000037812	CDS	chr6	33689443:33714762	-	IP6K3	NM_054111	1402.52	1294.43	1517.36	1.17222	0.229246	1.20004	0.263084	5.25886e-05	0.00637819
TRCN0000037811	CDS	chr6	33689443:33714762	-	IP6K3	NM_054111	2509.66	2483.53	2537.42	1.0217	0.0309696	1.03916	0.05542	0.407827	0.50512
TRCN0000037810	CDS	chr6	33689443:33714762	-	IP6K3	NM_054111	1142.34	1133.5	1151.74	1.01609	0.0230265	1.01704	0.0243757	0.751704	0.816338
TRCN0000037809	CDS	chr6	33689443:33714762	-	IP6K3	NM_054111	1894.25	1887.44	1901.49	1.00744	0.0106979	1.01316	0.018859	0.796656	0.851331
TRCN0000037813	CDS	chr6	33689443:33714762	-	IP6K3	NM_054111	352.277	354.937	349.45	0.984543	-0.0224736	0.978347	-0.0315824	0.803471	0.856769
TRCN0000052601	CDS	chr10	59951278:60027694	-	IPMK	NM_152230	791.015	716.591	870.091	1.21421	0.280017	1.21287	0.27843	0.00155103	0.0159671
TRCN0000052600	CDS	chr10	59951278:60027694	-	IPMK	NM_152230	600.983	517.95	689.205	1.33064	0.412122	1.33988	0.422104	0.00280347	0.0199225
TRCN0000052602	CDS	chr10	59951278:60027694	-	IPMK	NM_152230	1263.39	1204.68	1325.76	1.10051	0.138178	1.09071	0.12527	0.0579038	0.114287
TRCN0000052599	CDS	chr10	59951278:60027694	-	IPMK	NM_152230	1599.42	1774.4	1413.51	0.796611	-0.328053	0.833283	-0.263122	0.0205473	0.0562524
TRCN0000052598	CDS	chr10	59951278:60027694	-	IPMK	NM_152230	935.868	976.427	892.774	0.914327	-0.129218	0.929902	-0.10485	0.364631	0.462345
TRCN0000000545	CDS	chrX	153275957:153285342	-	IRAK1	NM_001569	906.883	818.182	1001.13	1.2236	0.291134	1.23188	0.300865	0.0044137	0.0242467
TRCN0000000543	3UTR	chrX	153275957:153285342	-	IRAK1	NM_001569	697.952	626.071	774.325	1.2368	0.306613	1.22307	0.290503	0.00576733	0.0274038
TRCN0000000546	CDS	chrX	153275957:153285342	-	IRAK1	NM_001569	1370.35	1300.7	1444.36	1.11045	0.151144	1.12891	0.174925	0.00831203	0.0333226
TRCN0000000544	CDS	chrX	153275957:153285342	-	IRAK1	NM_001569	1036.38	1019.4	1054.42	1.03435	0.0487249	1.05906	0.0827827	0.277189	0.374486
TRCN0000000547	CDS	chrX	153275957:153285342	-	IRAK1	NM_001569	3056.4	3678.32	2395.61	0.651277	-0.618657	0.734658	-0.444854	6.96023e-05	0.00686112
TRCN0000000551	CDS	chr3	10206563:10285427	+	IRAK2	NM_001570	1429.83	1300.93	1566.79	1.20436	0.26827	1.21419	0.28	0.00672942	0.0297763
TRCN0000000549	CDS	chr3	10206563:10285427	+	IRAK2	NM_001570	499.822	452.792	549.791	1.21422	0.280034	1.22467	0.292397	0.014698	0.0458798
TRCN0000000548	CDS	chr3	10206563:10285427	+	IRAK2	NM_001570	1966.78	2091.99	1833.75	0.876556	-0.190082	0.874186	-0.193988	0.044566	0.0950777
TRCN0000000550	CDS	chr3	10206563:10285427	+	IRAK2	NM_001570	449.019	481.736	414.258	0.859929	-0.21771	0.903707	-0.146073	0.209782	0.300282
TRCN0000000879	CDS	chr12	66582978:66648394	+	IRAK3	NM_007199	2543.64	2716.49	2360	0.868769	-0.202955	0.859596	-0.21827	0.00311592	0.0211646
TRCN0000000877	CDS	chr12	66582978:66648394	+	IRAK3	NM_007199	11488.1	12072.4	10867.3	0.900177	-0.15172	0.891231	-0.166129	0.0169993	0.05
TRCN0000000876	CDS	chr12	66582978:66648394	+	IRAK3	NM_007199	2570.49	2710.94	2421.26	0.893143	-0.163037	0.89795	-0.155293	0.0716401	0.133841
TRCN0000000875	3UTR	chr12	66582978:66648394	+	IRAK3	NM_007199	3107.15	3255.28	2949.77	0.90615	-0.142179	0.918788	-0.122195	0.121923	0.19835
TRCN0000000878	CDS	chr12	66582978:66648394	+	IRAK3	NM_007199	4546.89	4730.61	4351.69	0.9199	-0.120451	0.9233	-0.115129	0.130023	0.208342
TRCN0000002064	CDS	chr12	44152747:44183346	+	IRAK4	NM_016123	1181.22	1111	1255.84	1.13038	0.176803	1.15042	0.20216	0.0120126	0.0409772
TRCN0000002063	CDS	chr12	44152747:44183346	+	IRAK4	NM_016123	177.513	161.783	194.225	1.20053	0.263668	1.18553	0.245532	0.0878062	0.154614
TRCN0000002065	CDS	chr12	44152747:44183346	+	IRAK4	NM_016123	624.319	609.943	639.593	1.04861	0.0684806	1.04596	0.0648224	0.475331	0.568582
TRCN0000002066	3UTR	chr12	44152747:44183346	+	IRAK4	NM_016123	1157.38	1164.98	1149.3	0.986538	-0.0195532	0.995862	-0.00598216	0.942332	0.958596
TRCN0000010023	CDS	chr5	156607907:156682109	+	ITK	NM_005546	4154.57	4092.52	4220.49	1.03127	0.0444213	1.06477	0.0905371	0.0992722	0.168925
TRCN0000010022	CDS	chr5	156607907:156682109	+	ITK	NM_005546	4151.99	4493.01	3789.65	0.843456	-0.245616	0.854307	-0.227173	0.00255893	0.01904
TRCN0000010021	CDS	chr5	156607907:156682109	+	ITK	NM_005546	5192.84	5327.51	5049.76	0.947864	-0.0772485	0.954256	-0.0675514	0.165532	0.251055
TRCN0000010020	CDS	chr5	156607907:156682109	+	ITK	NM_005546	4534.8	4535.86	4533.66	0.999514	-0.000701554	0.98114	-0.0274685	0.661337	0.740402
TRCN0000037694	CDS	chr14	93403259:93582263	-	ITPK1	NM_014216	246.354	194.033	301.945	1.55616	0.637986	1.40153	0.487002	0.00095014	0.0132161
TRCN0000037697	CDS	chr14	93403259:93582263	-	ITPK1	NM_014216	5939.97	5535.87	6369.32	1.15055	0.202328	1.18084	0.239819	0.00188842	0.0168197
TRCN0000037695	CDS	chr14	93403259:93582263	-	ITPK1	NM_014216	3635.43	3707.22	3559.14	0.960056	-0.0588094	0.959525	-0.0596074	0.248861	0.344458
TRCN0000037698	CDS	chr14	93403259:93582263	-	ITPK1	NM_014216	1821	1859.34	1780.27	0.957473	-0.0626961	0.971178	-0.0421922	0.580664	0.668509
TRCN0000037696	CDS	chr14	93403259:93582263	-	ITPK1	NM_014216	3457.04	3469.76	3443.52	0.992438	-0.0109506	0.995881	-0.00595507	0.920556	0.946048
TRCN0000037565	CDS	chr15	41786056:41795757	+	ITPKA	NM_002220	1908.5	1709.17	2120.28	1.24054	0.310963	1.26636	0.340684	0.00103022	0.0132573
TRCN0000037564	CDS	chr15	41786056:41795757	+	ITPKA	NM_002220	1408.55	1244.93	1582.39	1.27107	0.346045	1.28443	0.361126	0.00398992	0.0229358
TRCN0000037567	CDS	chr15	41786056:41795757	+	ITPKA	NM_002220	10109.3	10073	10147.9	1.00744	0.010693	1.00789	0.0113422	0.736807	0.803061
TRCN0000037566	CDS	chr15	41786056:41795757	+	ITPKA	NM_002220	9019.16	9316.83	8702.9	0.934105	-0.0983432	0.936839	-0.0941272	0.058913	0.115671
TRCN0000037568	CDS	chr15	41786056:41795757	+	ITPKA	NM_002220	8719.35	9012.11	8408.28	0.932998	-0.100054	0.945968	-0.0801372	0.314463	0.413869
TRCN0000037711	CDS	chr1	226819391:226926876	-	ITPKB	NM_002221	4120.3	3881.59	4373.93	1.12684	0.172281	1.14015	0.189221	0.00695693	0.0302642
TRCN0000037713	CDS	chr1	226819391:226926876	-	ITPKB	NM_002221	4921.39	5216.09	4608.28	0.883473	-0.178742	0.879544	-0.185172	0.0117646	0.0405153
TRCN0000037712	CDS	chr1	226819391:226926876	-	ITPKB	NM_002221	2669.81	2775.94	2557.06	0.92115	-0.118492	0.936439	-0.0947438	0.20547	0.29524
TRCN0000037710	CDS	chr1	226819391:226926876	-	ITPKB	NM_002221	3953	4077.64	3820.57	0.936956	-0.0939463	0.931283	-0.102708	0.237572	0.332158
TRCN0000037718	CDS	chr19	41223008:41246765	+	ITPKC	NM_025194	923.045	801.315	1052.38	1.31332	0.393219	1.33161	0.413171	0.000576908	0.0116852
TRCN0000037714	CDS	chr19	41223008:41246765	+	ITPKC	NM_025194	1969.69	1967.32	1972.2	1.00248	0.00357682	1.00473	0.00680777	0.92221	0.946249
TRCN0000037716	CDS	chr19	41223008:41246765	+	ITPKC	NM_025194	5025.67	5491.52	4530.7	0.825036	-0.27747	0.838656	-0.253849	0.00296408	0.0206007
TRCN0000037717	CDS	chr19	41223008:41246765	+	ITPKC	NM_025194	539.752	622.308	452.037	0.726388	-0.461188	0.793809	-0.333136	0.0114462	0.0399157
TRCN0000037715	CDS	chr19	41223008:41246765	+	ITPKC	NM_025194	3071.75	3303.74	2825.26	0.855169	-0.225719	0.868193	-0.203912	0.0128175	0.0422008
TRCN0000003102	CDS	chr1	65298906:65432187	-	JAK1	NM_002227	2162.46	1971.07	2365.81	1.20027	0.263354	1.21957	0.286371	0.00102083	0.0132573
TRCN0000003105	CDS	chr1	65298906:65432187	-	JAK1	NM_002227	1072.39	945.285	1207.44	1.27732	0.353125	1.29229	0.369927	0.00226732	0.0182414
TRCN0000003103	CDS	chr1	65298906:65432187	-	JAK1	NM_002227	942.108	835.508	1055.37	1.26315	0.337024	1.27376	0.349096	0.00562541	0.0271302
TRCN0000003104	CDS	chr1	65298906:65432187	-	JAK1	NM_002227	3176.52	3426.51	2910.91	0.849527	-0.235269	0.847308	-0.239041	0.00394708	0.0229052
TRCN0000003180	CDS	chr9	4985245:5128183	+	JAK2	NM_004972	276.642	243.489	311.867	1.28083	0.357076	1.26454	0.338612	0.0195439	0.054498
TRCN0000003179	CDS	chr9	4985245:5128183	+	JAK2	NM_004972	2168.28	2057.3	2286.21	1.11127	0.152204	1.12228	0.166431	0.0356497	0.0808168
TRCN0000003181	CDS	chr9	4985245:5128183	+	JAK2	NM_004972	1064.54	1027.87	1103.51	1.0736	0.102453	1.09039	0.124843	0.105236	0.176923
TRCN0000003178	3UTR	chr9	4985245:5128183	+	JAK2	NM_004972	7674.32	8044.96	7280.51	0.904978	-0.144046	0.914852	-0.12839	0.0147819	0.046046
TRCN0000003177	CDS	chr9	4985245:5128183	+	JAK2	NM_004972	2064.8	2201.08	1920	0.872298	-0.197108	0.884106	-0.177708	0.0609698	0.118309
TRCN0000000387	CDS	chr19	17935593:17958841	-	JAK3	NM_000215	124.089	109.409	139.686	1.27673	0.352453	1.26134	0.334954	0.0309218	0.0731896
TRCN0000000385	CDS	chr19	17935593:17958841	-	JAK3	NM_000215	1035.93	981.691	1093.55	1.11395	0.155684	1.12089	0.164642	0.0516503	0.10503
TRCN0000000384	CDS	chr19	17935593:17958841	-	JAK3	NM_000215	1933.48	1849.91	2022.28	1.09318	0.128529	1.09624	0.132561	0.0976259	0.166948
TRCN0000000386	CDS	chr19	17935593:17958841	-	JAK3	NM_000215	967.208	959.211	975.705	1.01719	0.0245959	1.02158	0.030809	0.618287	0.701877
TRCN0000000383	3UTR	chr19	17935593:17958841	-	JAK3	NM_000215	1667.37	1766.23	1562.32	0.884552	-0.176981	0.877846	-0.18796	0.0143041	0.0448833
TRCN0000001688	CDS	chr4	55944426:55991762	-	KDR	NM_002253	1765.57	1622.88	1917.17	1.18134	0.240424	1.25661	0.329538	0.00746981	0.0312299
TRCN0000001686	CDS	chr4	55944426:55991762	-	KDR	NM_002253	3661.47	3497.99	3835.16	1.09639	0.132763	1.11146	0.15246	0.00838188	0.0333256
TRCN0000001687	3UTR	chr4	55944426:55991762	-	KDR	NM_002253	2624.85	2510.59	2746.25	1.09387	0.129436	1.10649	0.145995	0.057391	0.113648
TRCN0000001689	CDS	chr4	55944426:55991762	-	KDR	NM_002253	5150.78	5336.65	4953.29	0.928164	-0.107548	0.925163	-0.112221	0.0593488	0.115997
TRCN0000001685	CDS	chr4	55944426:55991762	-	KDR	NM_002253	608.742	625.018	591.449	0.946291	-0.0796439	0.966693	-0.0488699	0.632646	0.715475
TRCN0000037725	CDS	chr2	27309611:27323619	+	KHK	NM_000221	1916.8	1799.78	2041.14	1.1341	0.181551	1.13772	0.186144	0.0204026	0.0559581
TRCN0000037727	CDS	chr2	27309611:27323619	+	KHK	NM_000221	2510.64	2768.05	2237.14	0.8082	-0.307216	0.819999	-0.286306	0.000464269	0.0110692
TRCN0000037726	CDS	chr2	27309611:27323619	+	KHK	NM_000221	332.937	360.233	303.936	0.843722	-0.245161	0.854713	-0.226487	0.045226	0.0959145
TRCN0000003211	3UTR	chr1	233463514:233520894	+	KIAA1804	NM_032435	770.48	672.681	874.391	1.29986	0.378357	1.34903	0.431918	0.000505506	0.0114252
TRCN0000003209	CDS	chr1	233463514:233520894	+	KIAA1804	NM_032435	1615.51	1473.32	1766.58	1.19904	0.261882	1.2099	0.274886	0.000949017	0.0132161
TRCN0000003210	CDS	chr1	233463514:233520894	+	KIAA1804	NM_032435	1377.54	1249.52	1513.55	1.21131	0.276564	1.22738	0.295582	0.00477714	0.0251069
TRCN0000003213	CDS	chr1	233463514:233520894	+	KIAA1804	NM_032435	555.628	496.645	618.298	1.24495	0.316086	1.26272	0.336536	0.00882566	0.0341817
TRCN0000003212	CDS	chr1	233463514:233520894	+	KIAA1804	NM_032435	2888.7	2708.71	3079.95	1.13705	0.185302	1.16381	0.218855	0.0185017	0.0525672
TRCN0000000388	3UTR	chr4	55524095:55606881	+	KIT	NM_000222	747.378	620.582	882.1	1.42141	0.507321	1.38301	0.467816	3.05474e-06	0.00306085
TRCN0000000390	CDS	chr4	55524095:55606881	+	KIT	NM_000222	1721.84	1816.71	1621.03	0.892287	-0.164419	0.903015	-0.147177	0.0446927	0.095146
TRCN0000000389	CDS	chr4	55524095:55606881	+	KIT	NM_000222	1430.8	1545.62	1308.81	0.846788	-0.239928	0.887544	-0.17211	0.0825045	0.147936
TRCN0000000391	CDS	chr4	55524095:55606881	+	KIT	NM_000222	234.477	236.878	231.926	0.979092	-0.0304837	0.978021	-0.0320627	0.813113	0.864292
TRCN0000000392	CDS	chr4	55524095:55606881	+	KIT	NM_000222	791.102	801.345	780.218	0.973635	-0.038547	0.993315	-0.00967628	0.927821	0.949942
TRCN0000006229	CDS	chr17	25799036:25950718	+	KSR1	XM_290793	96.6089	70.9095	123.914	1.7475	0.805295	1.46245	0.548391	0.000287162	0.00980918
TRCN0000006226	CDS	chr17	25799036:25950718	+	KSR1	XM_290793	547.341	476.935	622.147	1.30447	0.383463	1.27999	0.356128	0.00239052	0.0186586
TRCN0000006228	CDS	chr17	25799036:25950718	+	KSR1	XM_290793	1300.79	1260.14	1343.98	1.06653	0.0929203	1.08773	0.121316	0.204894	0.294694
TRCN0000006227	CDS	chr17	25799036:25950718	+	KSR1	XM_290793	83.0382	72.0678	94.6944	1.31396	0.393925	1.13046	0.176914	0.2563	0.352603
TRCN0000006230	CDS	chr17	25799036:25950718	+	KSR1	XM_290793	772.25	793.339	749.843	0.945174	-0.0813484	0.947666	-0.0775488	0.364662	0.462345
TRCN0000007062	CDS	chr12	117890817:118406028	-	KSR2	NM_173598	2875.19	2710.66	3050.01	1.12519	0.170169	1.15363	0.206176	0.0168189	0.0497615
TRCN0000007063	CDS	chr12	117890817:118406028	-	KSR2	NM_173598	22441.8	24657.6	20087.4	0.814653	-0.295743	0.828464	-0.271489	0.000901584	0.0131476
TRCN0000007065	CDS	chr12	117890817:118406028	-	KSR2	NM_173598	1999.33	2168.68	1819.4	0.83894	-0.253361	0.854831	-0.226288	0.00146996	0.0157249
TRCN0000007061	CDS	chr12	117890817:118406028	-	KSR2	NM_173598	11264.7	11437.1	11081.5	0.968907	-0.0455704	0.956699	-0.0638628	0.151159	0.233978
TRCN0000007064	CDS	chr12	117890817:118406028	-	KSR2	NM_173598	1390.8	1439.91	1338.61	0.929648	-0.105243	0.92907	-0.106141	0.304756	0.403034
TRCN0000001778	CDS	chr6	149979289:150039392	-	LATS1	NM_004690	2638.55	2468.77	2818.93	1.14183	0.191352	1.16221	0.21687	0.00122111	0.014118
TRCN0000001780	3UTR	chr6	149979289:150039392	-	LATS1	NM_004690	4481.98	4308.35	4666.46	1.08312	0.115192	1.08672	0.11998	0.0189172	0.0532939
TRCN0000001776	CDS	chr6	149979289:150039392	-	LATS1	NM_004690	5911.63	6239.28	5563.5	0.89169	-0.165385	0.885465	-0.175493	0.00396677	0.0229358
TRCN0000001779	CDS	chr6	149979289:150039392	-	LATS1	NM_004690	4062.46	4110.47	4011.45	0.975909	-0.0351815	0.948697	-0.0759808	0.173541	0.260181
TRCN0000001777	CDS	chr6	149979289:150039392	-	LATS1	NM_004690	2151.92	2166.94	2135.96	0.985704	-0.0207743	0.977938	-0.032185	0.580011	0.668013
TRCN0000000880	3UTR	chr13	21547176:21635722	-	LATS2	NM_014572	1691.86	1516.62	1878.05	1.23831	0.308377	1.24325	0.314116	0.000707929	0.0124446
TRCN0000000884	CDS	chr13	21547176:21635722	-	LATS2	NM_014572	769.394	681.791	862.472	1.26501	0.339148	1.25966	0.333035	0.00237898	0.0186586
TRCN0000000882	CDS	chr13	21547176:21635722	-	LATS2	NM_014572	2828.73	3145.2	2492.48	0.792472	-0.335568	0.802738	-0.316999	0.000196725	0.009211
TRCN0000000881	CDS	chr13	21547176:21635722	-	LATS2	NM_014572	1560.86	1647	1469.34	0.892134	-0.164668	0.888215	-0.171019	0.0701457	0.131951
TRCN0000000883	CDS	chr13	21547176:21635722	-	LATS2	NM_014572	1256.12	1259.1	1252.97	0.995132	-0.00704012	1.01468	0.0210291	0.737403	0.803128
TRCN0000001599	CDS	chr1	32716840:32751768	+	LCK	NM_005356	4004.6	3785.62	4237.26	1.1193	0.162602	1.12685	0.1723	0.0206824	0.0564679
TRCN0000001598	3UTR	chr1	32716840:32751768	+	LCK	NM_005356	3642.27	3621.28	3664.57	1.01196	0.0171472	1.01416	0.0202786	0.761981	0.824223
TRCN0000001600	CDS	chr1	32716840:32751768	+	LCK	NM_005356	4198.94	4225.23	4171.01	0.987166	-0.0186354	0.992413	-0.0109869	0.823767	0.872531
TRCN0000000826	CDS	chr7	73498107:73536855	+	LIMK1	NM_002314	11409	11176.1	11656.5	1.04298	0.060714	1.04251	0.0600662	0.183728	0.271703
TRCN0000000825	3UTR	chr7	73498107:73536855	+	LIMK1	NM_002314	998.019	1056.74	935.624	0.885384	-0.175625	0.907156	-0.140577	0.177848	0.265579
TRCN0000010242	CDS	chr22	31608250:31676066	+	LIMK2	NM_016733	1165.42	1161.66	1169.41	1.00667	0.00958576	1.00731	0.0105048	0.899242	0.929608
TRCN0000010237	CDS	chr22	31608250:31676066	+	LIMK2	NM_016733	1068.1	1061.16	1075.47	1.01348	0.0193204	1.00535	0.00769978	0.92208	0.946249
TRCN0000010241	CDS	chr22	31608250:31676066	+	LIMK2	NM_016733	1262.81	1366.94	1152.16	0.842872	-0.246615	0.85949	-0.218448	0.0171711	0.0502104
TRCN0000010240	CDS	chr22	31608250:31676066	+	LIMK2	NM_016733	1711.46	1837.05	1578.01	0.858992	-0.219283	0.87653	-0.190125	0.0507977	0.103876
TRCN0000010635	CDS	chr7	97736197:97838944	+	LMTK2	NM_014916	3371.94	2937.56	3833.47	1.30498	0.384033	1.33932	0.4215	5.28407e-05	0.00637819
TRCN0000010636	CDS	chr7	97736197:97838944	+	LMTK2	NM_014916	885.976	808.379	968.422	1.19798	0.260605	1.21849	0.285094	0.00399422	0.0229358
TRCN0000010633	CDS	chr7	97736197:97838944	+	LMTK2	NM_014916	2486.38	2464.02	2510.14	1.01872	0.0267562	1.02165	0.0308959	0.549035	0.642179
TRCN0000010632	3UTR	chr7	97736197:97838944	+	LMTK2	NM_014916	4497.19	4801.53	4173.82	0.869268	-0.202126	0.872463	-0.196835	0.009354	0.0352358
TRCN0000010634	CDS	chr7	97736197:97838944	+	LMTK2	NM_014916	1684.01	1715.84	1650.19	0.96174	-0.0562805	0.962719	-0.0548134	0.599784	0.686002
TRCN0000021484	3UTR	chr19	48988528:49016446	-	LMTK3	XM_055866	764.432	670.114	864.645	1.29029	0.367701	1.30621	0.385388	0.000594404	0.0116878
TRCN0000021488	CDS	chr19	48988528:49016446	-	LMTK3	XM_055866	2795.08	2587.68	3015.45	1.16531	0.220715	1.19385	0.25562	0.000836685	0.013109
TRCN0000021485	CDS	chr19	48988528:49016446	-	LMTK3	XM_055866	2619.58	2444.34	2805.77	1.14786	0.198951	1.16836	0.224489	0.021426	0.0577639
TRCN0000021487	CDS	chr19	48988528:49016446	-	LMTK3	XM_055866	1689.72	1600.24	1784.78	1.11532	0.157454	1.12984	0.176113	0.0666267	0.126551
TRCN0000021486	CDS	chr19	48988528:49016446	-	LMTK3	XM_055866	3027.4	3070.49	2981.62	0.971058	-0.0423704	0.978366	-0.031554	0.522985	0.616279
TRCN0000021431	CDS	NA	NA:NA	NA	LOC388226	XM_370946	967.035	896.747	1041.72	1.16166	0.216188	1.20165	0.265018	0.0121346	0.0410774
TRCN0000021430	CDS	NA	NA:NA	NA	LOC388226	XM_370946	464.191	413.264	518.301	1.25416	0.326726	1.21126	0.276508	0.0431008	0.0933647
TRCN0000021432	CDS	NA	NA:NA	NA	LOC388226	XM_370946	1504.08	1463.67	1547.02	1.05694	0.0798945	1.06173	0.0864145	0.171486	0.257614
TRCN0000021429	3UTR	NA	NA:NA	NA	LOC388226	XM_370946	1307.04	1275.6	1340.43	1.05083	0.0715238	1.05387	0.0756934	0.337096	0.434338
TRCN0000021433	CDS	NA	NA:NA	NA	LOC388226	XM_370946	1450.38	1435.2	1466.51	1.02182	0.0311368	1.01399	0.0200486	0.770549	0.831695
TRCN0000037454	CDS	NA	NA:NA	NA	LOC390975	XM_372749	4027.54	4409.21	3622.01	0.821464	-0.283731	0.839268	-0.252796	0.00335983	0.0215093
TRCN0000037455	CDS	NA	NA:NA	NA	LOC390975	XM_372749	3365.9	3648.25	3065.91	0.840377	-0.250892	0.856236	-0.223919	0.00631097	0.0288748
TRCN0000037457	CDS	NA	NA:NA	NA	LOC390975	XM_372749	3363.97	3644.34	3066.07	0.841323	-0.249268	0.845399	-0.242296	0.00652805	0.0295532
TRCN0000037458	CDS	NA	NA:NA	NA	LOC390975	XM_372749	2632	2740.79	2516.42	0.918138	-0.123218	0.91311	-0.131139	0.0252927	0.0643775
TRCN0000021537	CDS	NA	NA:NA	NA	LOC400588	XM_378664	2427.04	2234.73	2631.37	1.17749	0.235715	1.18972	0.250625	0.00310719	0.0211646
TRCN0000021534	3UTR	NA	NA:NA	NA	LOC400588	XM_378664	757.612	719.151	798.478	1.11031	0.150957	1.10823	0.148251	0.0500371	0.102951
TRCN0000021535	CDS	NA	NA:NA	NA	LOC400588	XM_378664	6919.64	7306.32	6508.79	0.890844	-0.166755	0.902748	-0.147605	0.0262228	0.065963
TRCN0000037435	CDS	NA	NA:NA	NA	LOC401568	XM_376950	2738.03	2536.91	2951.73	1.16351	0.218486	1.16108	0.215472	0.0031439	0.0211646
TRCN0000037438	CDS	NA	NA:NA	NA	LOC401568	XM_376950	2996.85	2978.87	3015.95	1.01245	0.0178476	1.01243	0.0178202	0.730442	0.799311
TRCN0000037434	CDS	NA	NA:NA	NA	LOC401568	XM_376950	9830.37	10705	8901.06	0.831485	-0.266238	0.846509	-0.240403	0.00655054	0.0295539
TRCN0000037437	CDS	NA	NA:NA	NA	LOC401568	XM_376950	4630.07	4941.72	4298.94	0.869928	-0.201033	0.887136	-0.172773	0.0308719	0.0731896
TRCN0000037436	CDS	NA	NA:NA	NA	LOC401568	XM_376950	8292.96	8645.31	7918.58	0.915939	-0.126677	0.912027	-0.132852	0.061055	0.118331
TRCN0000007042	CDS	chr15	101459460:101610317	+	LRRK1	NM_024652	2715.67	2528.76	2914.27	1.15245	0.204703	1.16613	0.221728	0.00405547	0.0230288
TRCN0000007039	CDS	chr15	101459460:101610317	+	LRRK1	NM_024652	2490.77	2077.47	2929.89	1.41032	0.496019	1.3343	0.416087	0.00539619	0.0264151
TRCN0000007040	CDS	chr15	101459460:101610317	+	LRRK1	NM_024652	3601.36	3575.33	3629.02	1.01502	0.0215046	1.02175	0.0310383	0.515933	0.610498
TRCN0000007038	3UTR	chr15	101459460:101610317	+	LRRK1	NM_024652	7092.88	7069.72	7117.49	1.00676	0.00971533	1.00667	0.00959675	0.827634	0.875701
TRCN0000007041	CDS	chr15	101459460:101610317	+	LRRK1	NM_024652	4819.05	4835.39	4801.68	0.993029	-0.0100916	1.00121	0.00174324	0.974977	0.984144
TRCN0000021461	CDS	chr12	40618813:40763086	+	LRRK2	XM_058513	1028.03	946.851	1114.28	1.17682	0.234895	1.19367	0.2554	0.0210121	0.0570572
TRCN0000021460	CDS	chr12	40618813:40763086	+	LRRK2	XM_058513	1303.62	1292.16	1315.79	1.01829	0.0261446	1.01563	0.0223794	0.764902	0.826685
TRCN0000021462	CDS	chr12	40618813:40763086	+	LRRK2	XM_058513	1787.97	1845.45	1726.9	0.935759	-0.0957904	0.929803	-0.105003	0.0731403	0.135549
TRCN0000021463	CDS	chr12	40618813:40763086	+	LRRK2	XM_058513	2173.97	2268.69	2073.33	0.91389	-0.129908	0.926433	-0.110242	0.131647	0.210383
TRCN0000021459	3UTR	chr12	40618813:40763086	+	LRRK2	XM_058513	3476.74	3604.65	3340.84	0.926815	-0.109646	0.925387	-0.111871	0.239192	0.333802
TRCN0000003156	CDS	chr15	41795840:41806085	-	LTK	NM_002344	1883.87	1731.16	2046.11	1.18193	0.241146	1.23166	0.300606	0.0115905	0.0401858
TRCN0000003157	CDS	chr15	41795840:41806085	-	LTK	NM_002344	1827.25	1750.93	1908.34	1.0899	0.124198	1.10249	0.140762	0.045285	0.0959145
TRCN0000003155	CDS	chr15	41795840:41806085	-	LTK	NM_002344	736.898	699.777	776.339	1.10941	0.14979	1.12936	0.1755	0.0496383	0.102411
TRCN0000003154	CDS	chr15	41795840:41806085	-	LTK	NM_002344	2246.76	2375.35	2110.13	0.888346	-0.170806	0.902032	-0.148749	0.00688628	0.0300875
TRCN0000010106	CDS	chr8	56792386:56925006	+	LYN	NM_002350	3818.43	3631.28	4017.27	1.1063	0.145737	1.10457	0.143484	0.00672526	0.0297763
TRCN0000010107	CDS	chr8	56792386:56925006	+	LYN	NM_002350	2884.92	2769.5	3007.56	1.08596	0.118971	1.08312	0.115196	0.0340555	0.0784896
TRCN0000010105	CDS	chr8	56792386:56925006	+	LYN	NM_002350	2358.16	2311.61	2407.61	1.04153	0.0587005	1.06512	0.0910113	0.183497	0.271587
TRCN0000010104	CDS	chr8	56792386:56925006	+	LYN	NM_002350	5126.38	5507.95	4720.96	0.857118	-0.222435	0.857827	-0.221242	0.000150494	0.00836981
TRCN0000010101	CDS	chr8	56792386:56925006	+	LYN	NM_002350	4605.46	4843.82	4352.21	0.898507	-0.154398	0.893656	-0.162209	0.0072299	0.03061
TRCN0000037879	CDS	chr11	47290927:47351582	+	MADD	NM_003682	675.589	661.883	690.15	1.04271	0.0603336	1.04536	0.0640041	0.543881	0.637142
TRCN0000037881	CDS	chr11	47290927:47351582	+	MADD	NM_003682	3315.84	3641.59	2969.74	0.815507	-0.294231	0.82272	-0.281527	0.0020933	0.0177549
TRCN0000037882	CDS	chr11	47290927:47351582	+	MADD	NM_003682	1972.57	2074.81	1863.95	0.898372	-0.154616	0.888944	-0.169836	0.0587192	0.115366
TRCN0000037880	CDS	chr11	47290927:47351582	+	MADD	NM_003682	2191.76	2254.66	2124.93	0.942461	-0.0854946	0.940266	-0.0888591	0.149151	0.232063
TRCN0000037883	CDS	chr11	47290927:47351582	+	MADD	NM_003682	2966.45	3060.03	2867.02	0.936925	-0.0939947	0.9532	-0.0691491	0.400751	0.498204
TRCN0000001787	CDS	chr6	10762956:10838788	-	MAK	NM_005906	3657.26	3436.87	3891.42	1.13226	0.1792	1.15298	0.205368	0.00421117	0.0235401
TRCN0000001785	3UTR	chr6	10762956:10838788	-	MAK	NM_005906	2424.79	2289.26	2568.79	1.12211	0.166209	1.15448	0.207237	0.0300965	0.0722029
TRCN0000001786	CDS	chr6	10762956:10838788	-	MAK	NM_005906	1277.89	1227.28	1331.66	1.08505	0.117763	1.08595	0.118956	0.166314	0.251858
TRCN0000001789	CDS	chr6	10762956:10838788	-	MAK	NM_005906	3241.42	3382.01	3092.05	0.914265	-0.129315	0.92066	-0.119259	0.131344	0.210123
TRCN0000001788	CDS	chr6	10762956:10838788	-	MAK	NM_005906	6615.54	6736.67	6486.83	0.962914	-0.054521	0.944241	-0.0827732	0.135583	0.215073
TRCN0000002328	3UTR	chr15	66679211:66783882	+	MAP2K1	NM_002755	1513.52	1358.49	1678.24	1.23537	0.304938	1.26713	0.341563	0.00576723	0.0274038
TRCN0000002332	CDS	chr15	66679211:66783882	+	MAP2K1	NM_002755	2493.26	2491.25	2495.39	1.00166	0.00239656	0.995569	-0.00640672	0.915922	0.941608
TRCN0000002329	CDS	chr15	66679211:66783882	+	MAP2K1	NM_002755	1388.36	1382.01	1395.12	1.00948	0.0136157	1.0042	0.0060433	0.921068	0.946192
TRCN0000002330	CDS	chr15	66679211:66783882	+	MAP2K1	NM_002755	153.688	152.459	154.993	1.01662	0.0237817	0.996055	-0.00570307	0.970149	0.981401
TRCN0000002331	CDS	chr15	66679211:66783882	+	MAP2K1	NM_002755	4982.54	5333.56	4609.57	0.864257	-0.210468	0.865935	-0.20767	0.00299311	0.020636
TRCN0000007005	CDS	chr19	4090320:4124126	-	MAP2K2	NM_030662	13100.3	13566.2	12605.3	0.929171	-0.105985	0.915156	-0.12791	0.0112005	0.0393339
TRCN0000007007	CDS	chr19	4090320:4124126	-	MAP2K2	NM_030662	9165.79	9478.74	8833.29	0.931905	-0.101745	0.936745	-0.0942723	0.056913	0.113074
TRCN0000007006	CDS	chr19	4090320:4124126	-	MAP2K2	NM_030662	5222.9	5389.47	5045.91	0.936253	-0.0950289	0.92596	-0.110978	0.10678	0.179067
TRCN0000007008	CDS	chr19	4090320:4124126	-	MAP2K2	NM_030662	1461.94	1558.51	1359.33	0.872198	-0.197273	0.890852	-0.166743	0.111029	0.184496
TRCN0000009986	CDS	chr17	21187968:21218551	+	MAP2K3	NM_002756	3285.12	3173.55	3403.66	1.07251	0.10099	1.10354	0.142133	0.0330811	0.0769077
TRCN0000009974	CDS	chr17	21187968:21218551	+	MAP2K3	NM_002756	2393.47	2310.07	2482.09	1.07447	0.103624	1.08066	0.111912	0.0943449	0.163083
TRCN0000009975	CDS	chr17	21187968:21218551	+	MAP2K3	NM_002756	1073.99	1046.26	1103.45	1.05465	0.0767678	1.06602	0.0922339	0.28891	0.386102
TRCN0000009985	CDS	chr17	21187968:21218551	+	MAP2K3	NM_002756	3976.59	4122.43	3821.63	0.927033	-0.109307	0.93176	-0.10197	0.101142	0.171383
TRCN0000001390	CDS	chr17	11924135:12047148	+	MAP2K4	NM_003010	1536.17	1417.7	1662.04	1.17235	0.229409	1.19999	0.263024	0.00849151	0.0334308
TRCN0000039917	CDS	chr17	11924135:12047148	+	MAP2K4	NM_003010	635.223	597.553	675.248	1.13002	0.176352	1.12994	0.176244	0.0351689	0.0800891
TRCN0000001392	CDS	chr17	11924135:12047148	+	MAP2K4	NM_003010	6794.96	6768.43	6823.15	1.00808	0.0116154	1.02455	0.034987	0.46674	0.56076
TRCN0000039916	CDS	chr17	11924135:12047148	+	MAP2K4	NM_003010	848.444	844.405	852.735	1.00987	0.0141625	1.01192	0.0170927	0.860847	0.901326
TRCN0000001391	CDS	chr17	11924135:12047148	+	MAP2K4	NM_003010	6766.47	7314.93	6183.73	0.845357	-0.242367	0.855465	-0.225219	0.00444802	0.0242467
TRCN0000001389	3UTR	chr17	11924135:12047148	+	MAP2K4	NM_003010	2472.25	2608.52	2327.47	0.892255	-0.164472	0.908919	-0.137777	0.014298	0.0448833
TRCN0000001393	CDS	chr17	11924135:12047148	+	MAP2K4	NM_003010	3253.33	3364.52	3135.2	0.931841	-0.101844	0.930796	-0.103464	0.193803	0.282254
TRCN0000001468	CDS	chr15	67835021:68099455	+	MAP2K5	NM_145162	1445.82	1367.5	1529.03	1.11812	0.161074	1.1234	0.167877	0.032245	0.0754721
TRCN0000001469	CDS	chr15	67835021:68099455	+	MAP2K5	NM_145162	4452.77	4788.7	4095.85	0.855315	-0.225472	0.8579	-0.221118	0.00964911	0.035942
TRCN0000001470	CDS	chr15	67835021:68099455	+	MAP2K5	NM_145162	2413.88	2502.56	2319.66	0.926914	-0.109493	0.929918	-0.104825	0.125428	0.202817
TRCN0000001467	CDS	chr15	67835021:68099455	+	MAP2K5	NM_145162	2751.2	2846.45	2650	0.930986	-0.103168	0.922608	-0.11621	0.127408	0.205136
TRCN0000009990	CDS	chr17	67410838:67538470	+	MAP2K6	NM_002758	3573.47	3543.66	3605.14	1.01735	0.0248176	1.02987	0.0424605	0.453618	0.549164
TRCN0000009989	CDS	chr17	67410838:67538470	+	MAP2K6	NM_002758	5719	6192.46	5215.95	0.842305	-0.247585	0.852393	-0.23041	0.00852529	0.0334984
TRCN0000009987	CDS	chr17	67410838:67538470	+	MAP2K6	NM_002758	5030.99	5410.9	4627.34	0.85519	-0.225683	0.862047	-0.214161	0.0209519	0.0569452
TRCN0000009988	CDS	chr17	67410838:67538470	+	MAP2K6	NM_002758	4785.66	5113.28	4437.56	0.86785	-0.204482	0.877022	-0.189316	0.0361508	0.0815836
TRCN0000009991	CDS	chr17	67410838:67538470	+	MAP2K6	NM_002758	2980.12	3055.91	2899.59	0.948845	-0.0757561	0.936833	-0.0941362	0.108903	0.181767
TRCN0000001080	CDS	chr19	7968765:7979363	+	MAP2K7	NM_005043	2962.94	3223.02	2686.61	0.83357	-0.262625	0.840343	-0.250949	0.00354316	0.0218451
TRCN0000001079	CDS	chr19	7968765:7979363	+	MAP2K7	NM_005043	2813.65	2982.68	2634.06	0.883119	-0.17932	0.895017	-0.160013	0.0498186	0.102642
TRCN0000006160	CDS	chr5	56110900:56191978	+	MAP3K1	XM_042066	1216.41	1093.46	1347.04	1.2319	0.300889	1.23094	0.299765	0.0110116	0.038909
TRCN0000006161	CDS	chr5	56110900:56191978	+	MAP3K1	XM_042066	111.66	97.171	127.055	1.30754	0.386854	1.23513	0.304663	0.0510952	0.104257
TRCN0000006158	3UTR	chr5	56110900:56191978	+	MAP3K1	XM_042066	4608.15	4535.76	4685.07	1.03292	0.0467279	1.05447	0.0765184	0.160078	0.244261
TRCN0000006159	CDS	chr5	56110900:56191978	+	MAP3K1	XM_042066	4570.87	4849.92	4274.38	0.881329	-0.182248	0.881666	-0.181696	0.00539552	0.0264151
TRCN0000006162	CDS	chr5	56110900:56191978	+	MAP3K1	XM_042066	12478.4	13286.1	11620.3	0.874626	-0.193262	0.876621	-0.189975	0.0422556	0.0921104
TRCN0000001990	CDS	chr19	40697651:40721482	+	MAP3K10	NM_002446	1106.45	1039.44	1177.65	1.13297	0.180106	1.14658	0.197334	0.0137811	0.0439765
TRCN0000001988	CDS	chr19	40697651:40721482	+	MAP3K10	NM_002446	1295.09	1380.33	1204.51	0.872624	-0.196567	0.870594	-0.199927	0.0546259	0.109397
TRCN0000001989	CDS	chr19	40697651:40721482	+	MAP3K10	NM_002446	1400.99	1445.65	1353.54	0.936283	-0.0949829	0.919959	-0.120359	0.202469	0.292325
TRCN0000001991	CDS	chr19	40697651:40721482	+	MAP3K10	NM_002446	3952.77	4014.89	3886.77	0.968087	-0.046791	0.964095	-0.0527532	0.295523	0.393245
TRCN0000021566	CDS	chr11	65365226:65381720	-	MAP3K11	NM_002419	1656.99	1577.1	1741.86	1.10447	0.143354	1.10563	0.144869	0.0572707	0.113484
TRCN0000021565	CDS	chr11	65365226:65381720	-	MAP3K11	NM_002419	1228.69	1200.29	1258.87	1.04881	0.0687476	1.05133	0.0722212	0.344415	0.441686
TRCN0000021568	CDS	chr11	65365226:65381720	-	MAP3K11	NM_002419	480.566	479.595	481.598	1.00418	0.00601136	0.98442	-0.0226537	0.87321	0.911097
TRCN0000021567	CDS	chr11	65365226:65381720	-	MAP3K11	NM_002419	2158.61	2287.79	2021.36	0.883545	-0.178624	0.886584	-0.17367	0.0584412	0.11497
TRCN0000021564	3UTR	chr11	65365226:65381720	-	MAP3K11	NM_002419	2666.13	2768.3	2557.57	0.923877	-0.114227	0.923279	-0.115161	0.142982	0.224323
TRCN0000001003	CDS	chr12	53874276:53893444	-	MAP3K12	NM_006301	1152.96	1143.87	1162.62	1.01639	0.0234522	1.03101	0.0440547	0.598716	0.685094
TRCN0000001000	CDS	chr12	53874276:53893444	-	MAP3K12	NM_006301	1714.84	1707.9	1722.22	1.00838	0.0120454	1.01	0.0143545	0.843623	0.888242
TRCN0000001001	CDS	chr12	53874276:53893444	-	MAP3K12	NM_006301	2479.51	2666.95	2280.35	0.855041	-0.225934	0.866533	-0.206674	0.0435779	0.0937961
TRCN0000000999	3UTR	chr12	53874276:53893444	-	MAP3K12	NM_006301	1757.28	1819.63	1691.04	0.929328	-0.10574	0.92925	-0.105861	0.233401	0.32724
TRCN0000001002	CDS	chr12	53874276:53893444	-	MAP3K12	NM_006301	376.111	386.151	365.443	0.946373	-0.0795186	0.933087	-0.0999164	0.476142	0.569325
TRCN0000007105	CDS	chr3	185000729:185206882	+	MAP3K13	NM_004721	2204.08	2033.98	2384.81	1.17248	0.229568	1.19424	0.256093	0.00369335	0.0221647
TRCN0000007103	CDS	chr3	185000729:185206882	+	MAP3K13	NM_004721	10346.2	9956.23	10760.5	1.08078	0.112078	1.08566	0.118575	0.02413	0.0625541
TRCN0000007104	CDS	chr3	185000729:185206882	+	MAP3K13	NM_004721	2287.02	2238.77	2338.29	1.04445	0.0627496	1.05779	0.0810567	0.213927	0.304915
TRCN0000007102	3UTR	chr3	185000729:185206882	+	MAP3K13	NM_004721	4005.57	4312.25	3679.73	0.853321	-0.228839	0.860847	-0.216171	0.00349743	0.0217353
TRCN0000007106	CDS	chr3	185000729:185206882	+	MAP3K13	NM_004721	6598.66	6728.01	6461.23	0.960348	-0.0583709	0.963975	-0.0529324	0.325136	0.422694
TRCN0000000731	CDS	chr17	43340486:43394430	-	MAP3K14	NM_003954	1358	1131.67	1598.49	1.4125	0.498251	1.37098	0.455206	1.79263e-05	0.00553144
TRCN0000000733	CDS	chr17	43340486:43394430	-	MAP3K14	NM_003954	5436.14	5161.24	5728.21	1.10985	0.150367	1.11853	0.16161	0.0276485	0.0681529
TRCN0000000732	CDS	chr17	43340486:43394430	-	MAP3K14	NM_003954	3030.78	3114.66	2941.65	0.944452	-0.0824505	0.939276	-0.090379	0.146491	0.228517
TRCN0000000734	CDS	chr17	43340486:43394430	-	MAP3K14	NM_003954	3681	3688.57	3672.95	0.995767	-0.00611938	1.00461	0.00662846	0.900133	0.929828
TRCN0000021404	3UTR	chrX	19378176:19533379	-	MAP3K15	XM_372199	1436.12	1255	1628.55	1.29765	0.375899	1.31001	0.38958	0.00102844	0.0132573
TRCN0000021408	CDS	chrX	19378176:19533379	-	MAP3K15	XM_372199	2231.25	2158.25	2308.81	1.06976	0.0972902	1.07546	0.104949	0.0750793	0.138587
TRCN0000021407	CDS	chrX	19378176:19533379	-	MAP3K15	XM_372199	4986.14	5184.92	4774.93	0.920926	-0.118842	0.920898	-0.118887	0.0216663	0.0582027
TRCN0000021405	CDS	chrX	19378176:19533379	-	MAP3K15	XM_372199	1018.27	1047.57	987.14	0.942318	-0.0857145	0.950527	-0.0732006	0.450574	0.546801
TRCN0000021406	CDS	chrX	19378176:19533379	-	MAP3K15	XM_372199	362.582	369.004	355.758	0.964105	-0.052738	0.971644	-0.0414996	0.735303	0.802003
TRCN0000002044	CDS	chr2	128056245:128100805	-	MAP3K2	NM_006609	2017.11	1962.98	2074.62	1.05687	0.0798008	1.06639	0.0927375	0.110461	0.183959
TRCN0000002045	CDS	chr2	128056245:128100805	-	MAP3K2	NM_006609	793.434	792.838	794.068	1.00155	0.0022357	1.0228	0.0325212	0.754591	0.817996
TRCN0000002046	CDS	chr2	128056245:128100805	-	MAP3K2	NM_006609	1355.12	1355.09	1355.16	1.00005	7.36695e-05	0.983906	-0.0234075	0.782577	0.840153
TRCN0000002047	3UTR	chr2	128056245:128100805	-	MAP3K2	NM_006609	1697.76	1817.07	1570.99	0.864575	-0.209937	0.879322	-0.185536	0.0245192	0.0631033
TRCN0000002043	CDS	chr2	128056245:128100805	-	MAP3K2	NM_006609	742.647	808.576	672.596	0.831828	-0.265643	0.854318	-0.227155	0.0298527	0.0717324
TRCN0000002305	CDS	chr17	61699801:61773670	+	MAP3K3	NM_002401	1481.79	1628.69	1325.71	0.813975	-0.296944	0.829913	-0.268968	0.00248619	0.0189154
TRCN0000002308	CDS	chr17	61699801:61773670	+	MAP3K3	NM_002401	12144	12764.6	11484.6	0.899722	-0.152449	0.890332	-0.167584	0.00417442	0.023411
TRCN0000002306	CDS	chr17	61699801:61773670	+	MAP3K3	NM_002401	5344.64	5616.13	5056.17	0.900294	-0.151532	0.886956	-0.173066	0.00885687	0.0341817
TRCN0000002307	3UTR	chr17	61699801:61773670	+	MAP3K3	NM_002401	6014.71	6137.58	5884.15	0.958708	-0.0608372	0.954423	-0.0673	0.241516	0.336265
TRCN0000000850	CDS	chr6	161412759:161538417	+	MAP3K4	NM_005922	1551.36	1410.19	1701.36	1.20647	0.270797	1.23218	0.301217	0.00371624	0.0221647
TRCN0000000849	CDS	chr6	161412759:161538417	+	MAP3K4	NM_005922	2759.84	2808.66	2707.98	0.964153	-0.0526655	0.967141	-0.0482015	0.320146	0.418901
TRCN0000000852	CDS	chr6	161412759:161538417	+	MAP3K4	NM_005922	3797.25	3897.87	3690.35	0.94676	-0.078929	0.946694	-0.0790305	0.334493	0.431182
TRCN0000000851	CDS	chr6	161412759:161538417	+	MAP3K4	NM_005922	2830.68	2876.65	2781.83	0.967038	-0.0483554	0.974514	-0.0372447	0.464897	0.559216
TRCN0000000991	3UTR	chr6	136878187:137113656	-	MAP3K5	NM_005923	610.41	497.648	730.219	1.46734	0.553204	1.36625	0.450218	0.00121136	0.0141138
TRCN0000000993	CDS	chr6	136878187:137113656	-	MAP3K5	NM_005923	1455.48	1378.36	1537.41	1.11539	0.157553	1.14488	0.195196	0.0644283	0.123673
TRCN0000000994	CDS	chr6	136878187:137113656	-	MAP3K5	NM_005923	1201.82	1163.77	1242.25	1.06744	0.0941525	1.07223	0.100611	0.257896	0.354636
TRCN0000000992	CDS	chr6	136878187:137113656	-	MAP3K5	NM_005923	2161.68	2310.01	2004.08	0.867564	-0.204957	0.857283	-0.222156	0.00201486	0.0175028
TRCN0000000995	CDS	chr6	136878187:137113656	-	MAP3K5	NM_005923	4286.6	4723.84	3822.03	0.809094	-0.30562	0.834566	-0.260902	0.00511905	0.0256304
TRCN0000002346	3UTR	chr1	27681670:27693337	-	MAP3K6	NM_004672	1046.39	984.252	1112.42	1.13022	0.176605	1.16018	0.214351	0.0163739	0.0489577
TRCN0000002343	CDS	chr1	27681670:27693337	-	MAP3K6	NM_004672	2693.96	2590.47	2803.93	1.0824	0.114239	1.09033	0.124769	0.0417383	0.091314
TRCN0000002345	CDS	chr1	27681670:27693337	-	MAP3K6	NM_004672	2237.54	2393.59	2071.74	0.865535	-0.208336	0.877854	-0.187947	0.0312312	0.0735001
TRCN0000002342	CDS	chr1	27681670:27693337	-	MAP3K6	NM_004672	1893.49	1897.6	1889.12	0.995528	-0.00646678	0.996556	-0.00497716	0.931528	0.951458
TRCN0000001554	3UTR	chr6	91223292:91297020	-	MAP3K7	NM_145332	869.367	754.452	991.464	1.31415	0.394132	1.34108	0.423395	0.000317776	0.0100393
TRCN0000001556	CDS	chr6	91223292:91297020	-	MAP3K7	NM_145332	2836.03	2774.45	2901.46	1.04578	0.064574	1.04817	0.067876	0.27349	0.371324
TRCN0000001557	CDS	chr6	91223292:91297020	-	MAP3K7	NM_145332	2811.4	3034.03	2574.85	0.848658	-0.236745	0.832914	-0.26376	0.00909383	0.0346465
TRCN0000001555	CDS	chr6	91223292:91297020	-	MAP3K7	NM_145332	2502.51	2606.83	2391.67	0.917462	-0.12428	0.919588	-0.120941	0.132313	0.211223
TRCN0000001558	CDS	chr6	91223292:91297020	-	MAP3K7	NM_145332	4096.47	4175.74	4012.26	0.96085	-0.0576175	0.97507	-0.0364223	0.569378	0.659049
TRCN0000010012	CDS	chr10	30722950:30750762	+	MAP3K8	NM_005204	2338.44	2221.9	2462.26	1.10818	0.148188	1.10528	0.144418	0.0327247	0.0761971
TRCN0000010014	CDS	chr10	30722950:30750762	+	MAP3K8	NM_005204	1876.73	1852.75	1902.2	1.02669	0.0379958	1.03709	0.0525341	0.517527	0.611272
TRCN0000010013	CDS	chr10	30722950:30750762	+	MAP3K8	NM_005204	3323.02	3707.03	2915	0.786342	-0.346771	0.7875	-0.344649	0.000120845	0.00789697
TRCN0000010010	CDS	chr10	30722950:30750762	+	MAP3K8	NM_005204	3121.68	3220.98	3016.17	0.936415	-0.0947793	0.953551	-0.0686183	0.414083	0.510556
TRCN0000010011	CDS	chr10	30722950:30750762	+	MAP3K8	NM_005204	2123.74	2126.71	2120.59	0.997123	-0.00415694	1.00068	0.000981713	0.985277	0.988896
TRCN0000021498	CDS	chr14	71189243:71275888	-	MAP3K9	XM_027237	1883.47	1668.36	2112.02	1.26593	0.340194	1.28287	0.359372	0.000642206	0.0120654
TRCN0000021497	CDS	chr14	71189243:71275888	-	MAP3K9	XM_027237	2229.49	2062.99	2406.4	1.16646	0.22214	1.19874	0.261514	0.0137621	0.0439626
TRCN0000021495	CDS	chr14	71189243:71275888	-	MAP3K9	XM_027237	2143.75	2094.23	2196.37	1.04877	0.0687047	1.05003	0.0704361	0.192402	0.280998
TRCN0000021494	3UTR	chr14	71189243:71275888	-	MAP3K9	XM_027237	5712.91	6072.07	5331.29	0.878002	-0.187704	0.902249	-0.148402	0.164622	0.250117
TRCN0000001636	CDS	chr19	39078280:39108675	-	MAP4K1	NM_007181	3260.95	3093.93	3438.41	1.11134	0.152298	1.1275	0.173129	0.00189683	0.0168197
TRCN0000001633	CDS	chr19	39078280:39108675	-	MAP4K1	NM_007181	210.483	203.818	217.565	1.06745	0.0941638	1.12494	0.169852	0.192993	0.281346
TRCN0000001632	3UTR	chr19	39078280:39108675	-	MAP4K1	NM_007181	3439.12	3368.83	3513.79	1.04303	0.0607786	1.06158	0.0862108	0.240579	0.335427
TRCN0000001635	CDS	chr19	39078280:39108675	-	MAP4K1	NM_007181	5748.66	6100.25	5375.1	0.881128	-0.182577	0.882994	-0.179525	0.0104089	0.0375123
TRCN0000001634	CDS	chr19	39078280:39108675	-	MAP4K1	NM_007181	102.993	117.191	87.909	0.750137	-0.414773	0.900141	-0.151776	0.321575	0.419919
TRCN0000002235	3UTR	chr11	64556609:64570713	-	MAP4K2	NM_004579	1405.5	1288.71	1529.59	1.18692	0.247222	1.21185	0.277213	0.000667227	0.0120787
TRCN0000002236	CDS	chr11	64556609:64570713	-	MAP4K2	NM_004579	1807.72	1596.43	2032.21	1.27298	0.348205	1.3169	0.397145	0.00164596	0.0162221
TRCN0000002233	CDS	chr11	64556609:64570713	-	MAP4K2	NM_004579	778.436	747.429	811.38	1.08556	0.118441	1.10739	0.147165	0.129996	0.208342
TRCN0000002234	CDS	chr11	64556609:64570713	-	MAP4K2	NM_004579	2496.79	2690.39	2291.1	0.851586	-0.231776	0.85467	-0.226561	0.00600375	0.028111
TRCN0000002237	CDS	chr11	64556609:64570713	-	MAP4K2	NM_004579	8774.01	9288.57	8227.28	0.885742	-0.175041	0.886586	-0.173667	0.00843668	0.0333666
TRCN0000000666	CDS	chr2	39476407:39664453	-	MAP4K3	NM_003618	1702.34	1534.2	1880.99	1.22604	0.294006	1.24005	0.310402	0.000197164	0.009211
TRCN0000000665	CDS	chr2	39476407:39664453	-	MAP4K3	NM_003618	3965.59	3764.91	4178.81	1.10994	0.150477	1.11704	0.159686	0.000258762	0.00977013
TRCN0000000667	CDS	chr2	39476407:39664453	-	MAP4K3	NM_003618	1082.59	964.469	1208.1	1.25261	0.324933	1.28032	0.356503	0.000282673	0.00980918
TRCN0000000664	3UTR	chr2	39476407:39664453	-	MAP4K3	NM_003618	2610.72	2797.41	2412.38	0.862362	-0.213634	0.868481	-0.203434	0.0145296	0.0454483
TRCN0000001832	3UTR	chr2	102314165:102511152	+	MAP4K4	NM_145687	736.748	620.152	860.632	1.38777	0.472774	1.36103	0.444698	0.000303103	0.00991009
TRCN0000001831	CDS	chr2	102314165:102511152	+	MAP4K4	NM_145687	692.521	646.784	741.116	1.14585	0.196416	1.1496	0.201131	0.0171064	0.0501676
TRCN0000001830	CDS	chr2	102314165:102511152	+	MAP4K4	NM_145687	1730.21	1690.79	1772.09	1.04808	0.0677553	1.05955	0.0834545	0.25626	0.352603
TRCN0000001829	CDS	chr2	102314165:102511152	+	MAP4K4	NM_145687	1256.49	1306.29	1203.58	0.921374	-0.118141	0.920294	-0.119834	0.240805	0.335587
TRCN0000002189	CDS	chr14	50885211:50999376	-	MAP4K5	NM_006575	230.423	221.54	239.861	1.0827	0.114632	1.10635	0.145808	0.248269	0.343915
TRCN0000002188	CDS	chr14	50885211:50999376	-	MAP4K5	NM_006575	1135.07	1181.47	1085.77	0.919	-0.121864	0.915148	-0.127922	0.0978034	0.167044
TRCN0000002191	CDS	chr14	50885211:50999376	-	MAP4K5	NM_006575	990.036	1034.23	943.077	0.911862	-0.133113	0.929965	-0.104751	0.159427	0.243515
TRCN0000002190	CDS	chr14	50885211:50999376	-	MAP4K5	NM_006575	1636.53	1677.36	1593.16	0.9498	-0.0743043	0.930563	-0.103825	0.28631	0.383876
TRCN0000002187	CDS	chr14	50885211:50999376	-	MAP4K5	NM_006575	921.73	929.76	913.198	0.982187	-0.0259301	0.988161	-0.0171821	0.855095	0.896567
TRCN0000010050	CDS	chr22	22113947:22221970	-	MAPK1	NM_138957	3723.58	3432.19	4033.18	1.1751	0.232789	1.19566	0.257806	0.00218745	0.0179308
TRCN0000010041	CDS	chr22	22113947:22221970	-	MAPK1	NM_138957	5195.75	4873.94	5537.67	1.13618	0.184193	1.15348	0.205992	0.00327932	0.0212863
TRCN0000010039	CDS	chr22	22113947:22221970	-	MAPK1	NM_138957	7956.98	8187.04	7712.55	0.942044	-0.086134	0.937442	-0.0931985	0.0664199	0.126366
TRCN0000010049	CDS	chr22	22113947:22221970	-	MAPK1	NM_138957	5495.61	5644.79	5337.1	0.945491	-0.0808642	0.944712	-0.0820535	0.150089	0.233161
TRCN0000010040	CDS	chr22	22113947:22221970	-	MAPK1	NM_138957	6079.41	6116.9	6039.56	0.987356	-0.0183572	0.983171	-0.024486	0.640066	0.721639
TRCN0000001019	CDS	chr4	86936276:87374283	-	MAPK10	NM_002753	1574.91	1562.41	1588.18	1.01649	0.0236025	1.02804	0.0399029	0.562609	0.653604
TRCN0000001937	CDS	chr4	86936276:87374283	-	MAPK10	NM_138982	1904.83	1899.66	1910.32	1.00561	0.00807393	1.00551	0.00792111	0.908531	0.93618
TRCN0000001941	CDS	chr4	86936276:87374283	-	MAPK10	NM_138982	2578.35	2718.95	2428.96	0.893345	-0.162711	0.890219	-0.167767	0.00906681	0.0345873
TRCN0000001021	CDS	chr4	86936276:87374283	-	MAPK10	NM_002753	1243.7	1308.37	1174.99	0.898059	-0.155118	0.913611	-0.130348	0.128387	0.20627
TRCN0000001020	CDS	chr4	86936276:87374283	-	MAPK10	NM_002753	3955.31	4059.83	3844.25	0.946899	-0.0787169	0.956647	-0.0639411	0.222086	0.313717
TRCN0000001018	CDS	chr4	86936276:87374283	-	MAPK10	NM_002753	5461.6	5519.27	5400.33	0.97845	-0.0314303	0.969249	-0.0450614	0.452714	0.548512
TRCN0000001017	3UTR	chr4	86936276:87374283	-	MAPK10	NM_002753	4091.15	4130.12	4049.75	0.980539	-0.0283526	0.974962	-0.0365824	0.491564	0.585217
TRCN0000009977	CDS	chr22	50702142:50708822	-	MAPK11	NM_002751	2613.57	2594.67	2633.66	1.01503	0.0215221	1.00865	0.0124305	0.802764	0.856319
TRCN0000009976	CDS	chr22	50702142:50708822	-	MAPK11	NM_002751	10109.7	10743	9436.9	0.878427	-0.187005	0.883504	-0.178691	0.00336307	0.0215093
TRCN0000009972	CDS	chr22	50702142:50708822	-	MAPK11	NM_002751	6145.92	6607.1	5655.92	0.856037	-0.224254	0.853406	-0.228695	0.00431193	0.0238617
TRCN0000006145	CDS	chr22	50691331:50700089	-	MAPK12	NM_002969	2228.8	1903.09	2574.87	1.353	0.436162	1.28584	0.362711	0.00895644	0.0344681
TRCN0000006149	CDS	chr22	50691331:50700089	-	MAPK12	NM_002969	3777.7	3615.75	3949.77	1.09238	0.127472	1.11687	0.159461	0.0357056	0.0808601
TRCN0000006147	CDS	chr22	50691331:50700089	-	MAPK12	NM_002969	2103.82	2037.61	2174.16	1.06701	0.0935775	1.08367	0.115932	0.0950138	0.163932
TRCN0000006148	CDS	chr22	50691331:50700089	-	MAPK12	NM_002969	5532.11	5860.27	5183.44	0.884506	-0.177056	0.884872	-0.176459	0.02478	0.0635569
TRCN0000006146	CDS	chr22	50691331:50700089	-	MAPK12	NM_002969	72.2549	72.458	72.0391	0.994218	-0.00836565	0.999959	-5.93869e-05	0.999694	0.999694
TRCN0000009978	CDS	chr6	36098261:36112301	+	MAPK13	NM_002754	1858.18	1604.4	2127.81	1.32623	0.407335	1.35991	0.443515	0.00073776	0.0127328
TRCN0000009973	CDS	chr6	36098261:36112301	+	MAPK13	NM_002754	1802.4	1913.58	1684.27	0.880171	-0.184144	0.891279	-0.16605	0.0961616	0.165208
TRCN0000009980	CDS	chr6	36098261:36112301	+	MAPK13	NM_002754	1310.42	1383.56	1232.71	0.890964	-0.166561	0.898815	-0.153903	0.103711	0.174894
TRCN0000009981	CDS	chr6	36098261:36112301	+	MAPK13	NM_002754	3818.2	3959.36	3668.22	0.926469	-0.110186	0.931613	-0.102198	0.25576	0.352182
TRCN0000009979	CDS	chr6	36098261:36112301	+	MAPK13	NM_002754	1910.15	1917.98	1901.82	0.991578	-0.0122025	0.98964	-0.0150243	0.839421	0.884748
TRCN0000000513	CDS	chr6	35995454:36079013	+	MAPK14	NM_001315	542.754	464.044	626.383	1.34984	0.432783	1.28891	0.366148	0.0101728	0.0370658
TRCN0000010052	CDS	chr6	35995454:36079013	+	MAPK14	NM_139012	2660.66	2541.92	2786.82	1.09634	0.1327	1.13752	0.185891	0.0507026	0.103752
TRCN0000010054	CDS	chr6	35995454:36079013	+	MAPK14	NM_139012	5546.11	6052.48	5008.09	0.827445	-0.273265	0.825179	-0.277221	1.30582e-05	0.00553144
TRCN0000000509	3UTR	chr6	35995454:36079013	+	MAPK14	NM_001315	1939.92	2173.25	1692	0.778556	-0.361127	0.802438	-0.317538	0.000938448	0.0132161
TRCN0000000512	CDS	chr6	35995454:36079013	+	MAPK14	NM_001315	4266.66	4446.83	4075.23	0.916436	-0.125894	0.907622	-0.139837	0.0457272	0.096528
TRCN0000000511	CDS	chr6	35995454:36079013	+	MAPK14	NM_001315	2407.09	2525.46	2281.33	0.903331	-0.146673	0.895233	-0.159666	0.0574383	0.113667
TRCN0000010051	CDS	chr6	35995454:36079013	+	MAPK14	NM_139012	14038.4	14553.7	13490.8	0.926965	-0.109414	0.922643	-0.116156	0.115392	0.190065
TRCN0000010053	CDS	chr6	35995454:36079013	+	MAPK14	NM_139012	9126.98	9263.32	8982.11	0.969642	-0.0444759	0.961256	-0.0570074	0.182171	0.269938
TRCN0000038660	CDS	chr8	144798507:144804633	+	MAPK15	NM_139021	707.159	640.621	777.855	1.21422	0.280031	1.23282	0.301964	0.0266827	0.066729
TRCN0000038663	CDS	chr8	144798507:144804633	+	MAPK15	NM_139021	1257.88	1296.97	1216.35	0.937837	-0.0925904	0.937531	-0.093061	0.170837	0.256897
TRCN0000038659	CDS	chr8	144798507:144804633	+	MAPK15	NM_139021	2573.87	2594.7	2551.73	0.983441	-0.0240893	0.971144	-0.042243	0.448709	0.544758
TRCN0000006151	CDS	chr16	30125426:30134630	-	MAPK3	NM_002746	1203.64	1003.2	1416.6	1.41209	0.497827	1.35706	0.440487	0.00164586	0.0162221
TRCN0000006150	CDS	chr16	30125426:30134630	-	MAPK3	NM_002746	13098.1	12796.9	13418.1	1.04854	0.0683869	1.06044	0.0846631	0.0353504	0.0803638
TRCN0000006152	CDS	chr16	30125426:30134630	-	MAPK3	NM_002746	5207.13	5296.37	5112.31	0.965247	-0.0510294	0.960495	-0.0581493	0.236648	0.331021
TRCN0000001374	3UTR	chr18	48086484:48258196	+	MAPK4	NM_002747	1895.86	1792.49	2005.7	1.11895	0.16214	1.12902	0.17507	0.0277778	0.0683306
TRCN0000001378	CDS	chr18	48086484:48258196	+	MAPK4	NM_002747	1754.8	1686.73	1827.13	1.08324	0.115356	1.07447	0.10363	0.177733	0.26554
TRCN0000001375	CDS	chr18	48086484:48258196	+	MAPK4	NM_002747	8901.34	9463.43	8304.12	0.877496	-0.188536	0.874301	-0.193797	0.00247254	0.0189154
TRCN0000001376	CDS	chr18	48086484:48258196	+	MAPK4	NM_002747	1045.71	1099.03	989.065	0.899947	-0.152089	0.887199	-0.17267	0.101055	0.171332
TRCN0000001377	CDS	chr18	48086484:48258196	+	MAPK4	NM_002747	3813	3957.54	3659.42	0.924671	-0.112987	0.925726	-0.111343	0.10235	0.173234
TRCN0000001568	3UTR	chr15	52311411:52358462	+	MAPK6	NM_002748	398.624	365.561	433.752	1.18654	0.246758	1.22012	0.287018	0.00784339	0.03222
TRCN0000001570	CDS	chr15	52311411:52358462	+	MAPK6	NM_002748	3947.32	4159.07	3722.34	0.894994	-0.16005	0.899158	-0.153353	0.00703089	0.0304976
TRCN0000001569	CDS	chr15	52311411:52358462	+	MAPK6	NM_002748	3101.85	3197.46	3000.26	0.938325	-0.0918401	0.933394	-0.0994415	0.217013	0.307854
TRCN0000001571	CDS	chr15	52311411:52358462	+	MAPK6	NM_002748	399.672	415.158	383.219	0.923067	-0.115493	0.934193	-0.0982077	0.379449	0.476305
TRCN0000001356	CDS	chr17	19281034:19286857	+	MAPK7	NM_139034	2212.7	1975.54	2464.67	1.2476	0.319151	1.26488	0.339004	0.00319101	0.0211748
TRCN0000010261	CDS	chr17	19281034:19286857	+	MAPK7	NM_139032	38.1291	28.3898	48.4771	1.70755	0.771932	1.21967	0.286493	0.0554021	0.110804
TRCN0000001354	CDS	chr17	19281034:19286857	+	MAPK7	NM_139034	1660.41	1560.51	1766.55	1.13203	0.178917	1.13436	0.181874	0.0814037	0.146702
TRCN0000010262	CDS	chr17	19281034:19286857	+	MAPK7	NM_139032	288.379	235.69	344.362	1.46108	0.547037	1.17261	0.229722	0.0930273	0.161083
TRCN0000010271	CDS	chr17	19281034:19286857	+	MAPK7	NM_139032	1223.8	1191.15	1258.48	1.05653	0.0793348	1.05801	0.0813587	0.307394	0.406166
TRCN0000001355	CDS	chr17	19281034:19286857	+	MAPK7	NM_139034	1983.39	2153.93	1802.2	0.836702	-0.257214	0.848463	-0.237077	0.00333283	0.0214989
TRCN0000010275	CDS	chr17	19281034:19286857	+	MAPK7	NM_139032	959.01	1007.46	907.533	0.900814	-0.150698	0.920194	-0.119989	0.208142	0.298367
TRCN0000001056	CDS	chr10	49514682:49647402	+	MAPK8	NM_139049	2111.77	2301.69	1909.98	0.829819	-0.269131	0.821046	-0.284466	0.00106528	0.0134366
TRCN0000001055	3UTR	chr10	49514682:49647402	+	MAPK8	NM_139049	2425.12	2580.73	2259.79	0.875638	-0.191594	0.883964	-0.17794	0.0303065	0.0724751
TRCN0000001057	CDS	chr10	49514682:49647402	+	MAPK8	NM_139049	1655.46	1714.01	1593.25	0.929546	-0.105402	0.937449	-0.0931877	0.241358	0.336202
TRCN0000000946	CDS	chr5	179660595:179719071	-	MAPK9	NM_139069	2301.75	2067.86	2550.27	1.23329	0.302511	1.25774	0.330834	0.00026925	0.00977013
TRCN0000010276	CDS	chr5	179660595:179719071	-	MAPK9	NM_139069	495.672	448.686	545.596	1.21599	0.282127	1.18301	0.242467	0.0460207	0.0968755
TRCN0000000947	CDS	chr5	179660595:179719071	-	MAPK9	NM_139069	1670.97	1609.24	1736.56	1.07912	0.109852	1.07872	0.109321	0.0852392	0.150989
TRCN0000000944	CDS	chr5	179660595:179719071	-	MAPK9	NM_139069	4449.77	4322.94	4584.53	1.06051	0.0847626	1.06288	0.0879753	0.179575	0.267096
TRCN0000010277	CDS	chr5	179660595:179719071	-	MAPK9	NM_139069	599.037	586.507	612.35	1.04406	0.0622078	1.081	0.112361	0.268557	0.366115
TRCN0000010278	CDS	chr5	179660595:179719071	-	MAPK9	NM_139069	3156.42	3332.01	2969.85	0.89131	-0.166	0.889145	-0.169509	0.00157401	0.0159836
TRCN0000000945	CDS	chr5	179660595:179719071	-	MAPK9	NM_139069	5254.22	5502.13	4990.82	0.907071	-0.140713	0.89661	-0.157448	0.00634649	0.0289492
TRCN0000000943	3UTR	chr5	179660595:179719071	-	MAPK9	NM_139069	3280.55	3573.04	2969.78	0.831164	-0.266795	0.840287	-0.251045	0.0137594	0.0439626
TRCN0000001012	3UTR	chr5	179660595:179719071	-	MAPK9	NM_002752	511.91	538.549	483.607	0.897981	-0.155243	0.907902	-0.139391	0.189128	0.277596
TRCN0000010279	CDS	chr5	179660595:179719071	-	MAPK9	NM_139069	1741.92	1772.85	1709.05	0.964011	-0.0528781	0.951771	-0.0713132	0.355458	0.453333
TRCN0000010280	CDS	chr5	179660595:179719071	-	MAPK9	NM_139069	469.094	472.26	465.73	0.986174	-0.0200854	0.985874	-0.0205255	0.851768	0.894323
TRCN0000002282	CDS	chr1	206858365:206907630	+	MAPKAPK2	NM_032960	564.123	499.247	633.053	1.26801	0.342571	1.28007	0.356227	0.000894243	0.0131476
TRCN0000002286	CDS	chr1	206858365:206907630	+	MAPKAPK2	NM_032960	3940.16	4123.08	3745.8	0.908496	-0.138448	0.887012	-0.172975	0.00823716	0.0331916
TRCN0000002283	CDS	chr1	206858365:206907630	+	MAPKAPK2	NM_032960	1702.96	1845.24	1551.8	0.840976	-0.249863	0.843039	-0.246329	0.0237106	0.0618464
TRCN0000002285	3UTR	chr1	206858365:206907630	+	MAPKAPK2	NM_032960	1511.91	1518.71	1504.69	0.990764	-0.0133865	0.979283	-0.0302029	0.677436	0.754492
TRCN0000006154	CDS	chr3	50649293:50686728	+	MAPKAPK3	NM_004635	3261.82	3121.44	3410.99	1.09276	0.127978	1.11874	0.16188	0.00533104	0.0263342
TRCN0000006153	3UTR	chr3	50649293:50686728	+	MAPKAPK3	NM_004635	6095	6556.2	5604.98	0.854912	-0.226152	0.848873	-0.236379	4.39487e-05	0.00637819
TRCN0000006155	CDS	chr3	50649293:50686728	+	MAPKAPK3	NM_004635	2157.45	2282.56	2024.53	0.886953	-0.17307	0.875214	-0.192292	0.00544947	0.0265067
TRCN0000000680	3UTR	chr12	112280032:112331228	+	MAPKAPK5	NM_003668	4379.57	4360.64	4399.68	1.00895	0.0128578	1.01342	0.0192284	0.699988	0.774159
TRCN0000000684	CDS	chr12	112280032:112331228	+	MAPKAPK5	NM_003668	3219.4	3466.51	2956.84	0.852973	-0.229428	0.854431	-0.226965	0.000998939	0.0132573
TRCN0000000683	CDS	chr12	112280032:112331228	+	MAPKAPK5	NM_003668	3888.84	4050.19	3717.41	0.917837	-0.12369	0.912488	-0.132123	0.0382314	0.0852549
TRCN0000000682	CDS	chr12	112280032:112331228	+	MAPKAPK5	NM_003668	5039.93	5205.04	4864.5	0.934575	-0.097618	0.91342	-0.130649	0.0831959	0.148596
TRCN0000000681	CDS	chr12	112280032:112331228	+	MAPKAPK5	NM_003668	857.085	885.036	827.386	0.934862	-0.0971753	0.930081	-0.104572	0.186845	0.275592
TRCN0000006328	3UTR	chr1	220701525:220837799	+	MARK1	NM_018650	2675.38	2631.87	2721.61	1.0341	0.0483739	1.06303	0.0881765	0.273314	0.371253
TRCN0000006332	CDS	chr1	220701525:220837799	+	MARK1	NM_018650	3445.74	3668.76	3208.77	0.874619	-0.193273	0.871531	-0.198377	0.00315427	0.0211646
TRCN0000006331	CDS	chr1	220701525:220837799	+	MARK1	NM_018650	2500.02	2682.37	2306.28	0.859793	-0.217939	0.860931	-0.216031	0.00642497	0.0291744
TRCN0000006329	CDS	chr1	220701525:220837799	+	MARK1	NM_018650	5657.7	6014.73	5278.34	0.877569	-0.188416	0.876729	-0.189797	0.0090268	0.0345663
TRCN0000006330	CDS	chr1	220701525:220837799	+	MARK1	NM_018650	1474.17	1552.76	1390.68	0.895616	-0.159048	0.903429	-0.146517	0.0717732	0.133923
TRCN0000001582	CDS	chr11	63606400:63678492	+	MARK2	NM_004954	1456.4	1366.02	1552.43	1.13646	0.184545	1.1506	0.202391	0.044179	0.094521
TRCN0000001583	CDS	chr11	63606400:63678492	+	MARK2	NM_004954	593.85	576.71	612.062	1.0613	0.0858326	1.06728	0.0939336	0.38433	0.480973
TRCN0000001584	CDS	chr11	63606400:63678492	+	MARK2	NM_004954	3551.88	3633.79	3464.86	0.953511	-0.0686782	0.948344	-0.076517	0.194317	0.282592
TRCN0000001585	CDS	chr11	63606400:63678492	+	MARK2	NM_004954	3583.68	3614.92	3550.5	0.98218	-0.0259408	0.960832	-0.0576437	0.473092	0.566532
TRCN0000001581	3UTR	chr11	63606400:63678492	+	MARK2	NM_004954	1587	1592.11	1581.57	0.99338	-0.00958236	1.00715	0.0102836	0.884391	0.919571
TRCN0000001565	CDS	chr14	103851701:103970166	+	MARK3	NM_002376	3860.42	3839.94	3882.18	1.011	0.0157859	0.992581	-0.0107428	0.881893	0.917608
TRCN0000001564	3UTR	chr14	103851701:103970166	+	MARK3	NM_002376	3607.23	3967.6	3224.35	0.812671	-0.299257	0.824591	-0.278249	0.000532495	0.0114566
TRCN0000001567	CDS	chr14	103851701:103970166	+	MARK3	NM_002376	1422.6	1541.85	1295.89	0.840477	-0.25072	0.854627	-0.226632	0.0156265	0.0474935
TRCN0000001566	CDS	chr14	103851701:103970166	+	MARK3	NM_002376	3057.61	3161.74	2946.98	0.932077	-0.101479	0.937635	-0.0929021	0.0918439	0.159493
TRCN0000007156	3UTR	chr19	45754516:45808541	+	MARK4	NM_031417	564.025	475.727	657.841	1.38281	0.467603	1.40868	0.49434	0.000331008	0.010128
TRCN0000007159	CDS	chr19	45754516:45808541	+	MARK4	NM_031417	843.459	753.896	938.62	1.24503	0.316177	1.23752	0.307453	0.0174328	0.0507658
TRCN0000007158	CDS	chr19	45754516:45808541	+	MARK4	NM_031417	1625.01	1567.85	1685.73	1.07519	0.104587	1.06655	0.0929468	0.156608	0.24043
TRCN0000007160	CDS	chr19	45754516:45808541	+	MARK4	NM_031417	1624.41	1674.33	1571.37	0.938507	-0.0915607	0.936067	-0.0953163	0.0625744	0.120819
TRCN0000007157	CDS	chr19	45754516:45808541	+	MARK4	NM_031417	1498.25	1554.82	1438.14	0.924957	-0.112542	0.925573	-0.111582	0.108042	0.180631
TRCN0000021547	CDS	chr19	12949259:12985766	+	MAST1	NM_014975	3127.1	2849.51	3422.03	1.20092	0.264139	1.2432	0.314063	0.00593341	0.0279558
TRCN0000021548	CDS	chr19	12949259:12985766	+	MAST1	NM_014975	1132.67	1023.46	1248.7	1.22007	0.286966	1.20457	0.268522	0.0722565	0.134491
TRCN0000021545	CDS	chr19	12949259:12985766	+	MAST1	NM_014975	2662.44	2592.66	2736.57	1.05551	0.0779345	1.05516	0.0774583	0.200254	0.289684
TRCN0000021546	CDS	chr19	12949259:12985766	+	MAST1	NM_014975	3718.53	4077.94	3336.65	0.818218	-0.289442	0.810352	-0.303379	0.00179781	0.0168197
TRCN0000001735	CDS	chr1	46269285:46501796	+	MAST2	NM_015112	2990.22	2837.23	3152.77	1.11122	0.152139	1.11786	0.160744	0.016593	0.0492384
TRCN0000001733	CDS	chr1	46269285:46501796	+	MAST2	NM_015112	1706.09	1643.28	1772.82	1.07883	0.109464	1.0988	0.135934	0.139446	0.219923
TRCN0000001736	CDS	chr1	46269285:46501796	+	MAST2	NM_015112	6156.4	6807.96	5464.13	0.802609	-0.317231	0.819833	-0.286598	0.00331505	0.0214302
TRCN0000001734	3UTR	chr1	46269285:46501796	+	MAST2	NM_015112	1647.64	1708.22	1583.27	0.926854	-0.109586	0.92959	-0.105333	0.26788	0.365626
TRCN0000021442	CDS	chr19	18208603:18262499	+	MAST3	XM_038150	434.515	365.54	507.801	1.38918	0.474233	1.39039	0.475487	0.000378591	0.0104839
TRCN0000021439	3UTR	chr19	18208603:18262499	+	MAST3	XM_038150	504.982	426.53	588.338	1.37936	0.464	1.35728	0.440718	0.0027631	0.0196822
TRCN0000021443	CDS	chr19	18208603:18262499	+	MAST3	XM_038150	856.074	772.998	944.343	1.22166	0.288845	1.21519	0.281181	0.0210978	0.0571867
TRCN0000021440	CDS	chr19	18208603:18262499	+	MAST3	XM_038150	432.49	428.395	436.84	1.01971	0.0281656	1.05511	0.0773963	0.468099	0.561943
TRCN0000021441	CDS	chr19	18208603:18262499	+	MAST3	XM_038150	2395.59	2642.96	2132.77	0.806962	-0.309427	0.830262	-0.268362	0.0196329	0.0545753
TRCN0000037878	CDS	chr5	65892176:66465423	+	MAST4	NM_198828	1006.6	937.627	1079.88	1.15171	0.20378	1.1437	0.193714	0.0207955	0.0566224
TRCN0000021450	CDS	chr5	65892176:66465423	+	MAST4	XM_291141	1504.75	1416.7	1598.31	1.12819	0.174015	1.13539	0.183186	0.043139	0.0933647
TRCN0000021449	CDS	chr5	65892176:66465423	+	MAST4	XM_291141	1123.25	1080.13	1169.06	1.08233	0.114134	1.09929	0.136576	0.065558	0.125281
TRCN0000037875	CDS	chr5	65892176:66465423	+	MAST4	NM_198828	1816.35	1755.42	1881.09	1.07159	0.0997528	1.08352	0.11573	0.103031	0.174191
TRCN0000021452	CDS	chr5	65892176:66465423	+	MAST4	XM_291141	4416.1	4370.47	4464.59	1.02153	0.0307383	1.03375	0.0478837	0.408166	0.505125
TRCN0000021453	CDS	chr5	65892176:66465423	+	MAST4	XM_291141	2240.16	2526.12	1936.32	0.76652	-0.383604	0.78347	-0.35205	0.000376362	0.0104839
TRCN0000021451	CDS	chr5	65892176:66465423	+	MAST4	XM_291141	2553.07	2743.04	2351.22	0.857157	-0.222368	0.868523	-0.203364	0.0120233	0.0409772
TRCN0000037876	CDS	chr5	65892176:66465423	+	MAST4	NM_198828	1502.23	1563.47	1437.16	0.919213	-0.121529	0.915493	-0.127379	0.189701	0.278129
TRCN0000002278	CDS	chr10	27443753:27475848	+	MASTL	NM_032844	583.785	530.427	640.477	1.20747	0.271993	1.21959	0.286396	0.01684	0.0497747
TRCN0000002277	CDS	chr10	27443753:27475848	+	MASTL	NM_032844	4323.65	4268.28	4382.48	1.02675	0.0380898	1.05092	0.0716498	0.285428	0.383035
TRCN0000002279	CDS	chr10	27443753:27475848	+	MASTL	NM_032844	1885.39	1877.15	1894.15	1.00905	0.0130024	1.02168	0.0309483	0.604159	0.689389
TRCN0000002281	CDS	chr10	27443753:27475848	+	MASTL	NM_032844	5179.64	5137.6	5224.3	1.01688	0.0241436	1.01806	0.0258264	0.608553	0.692413
TRCN0000002280	3UTR	chr10	27443753:27475848	+	MASTL	NM_032844	1194.53	1274.33	1109.75	0.870854	-0.199497	0.870264	-0.200475	0.0474933	0.0992113
TRCN0000002219	CDS	chr19	3777967:3801810	-	MATK	NM_002378	1755.65	1683.55	1832.26	1.08833	0.122117	1.09064	0.125171	0.0810647	0.146355
TRCN0000002223	CDS	chr19	3777967:3801810	-	MATK	NM_002378	331.769	324.887	339.081	1.04369	0.0616922	1.07315	0.101855	0.365315	0.462958
TRCN0000002222	3UTR	chr19	3777967:3801810	-	MATK	NM_002378	874.612	931.728	813.925	0.873565	-0.195013	0.896559	-0.15753	0.114875	0.18942
TRCN0000002220	CDS	chr19	3777967:3801810	-	MATK	NM_002378	393.75	407.919	378.695	0.928359	-0.107245	0.922198	-0.116851	0.333761	0.430964
TRCN0000002221	CDS	chr19	3777967:3801810	-	MATK	NM_002378	977.331	985.367	968.793	0.983179	-0.0244733	1.01255	0.0179956	0.870314	0.909161
TRCN0000001642	3UTR	chr9	36572859:36677680	+	MELK	NM_014791	3089.31	2629.17	3578.21	1.36097	0.444631	1.36214	0.445878	0.000380153	0.0104839
TRCN0000001645	CDS	chr9	36572859:36677680	+	MELK	NM_014791	4521.61	4867.37	4154.25	0.853489	-0.228555	0.868257	-0.203806	0.00467538	0.0249837
TRCN0000001644	CDS	chr9	36572859:36677680	+	MELK	NM_014791	4060.19	4279.23	3827.45	0.894426	-0.160966	0.889872	-0.168331	0.0128598	0.042229
TRCN0000001643	CDS	chr9	36572859:36677680	+	MELK	NM_014791	3254.83	3342.73	3161.45	0.945769	-0.0804401	0.962134	-0.0556902	0.343451	0.440825
TRCN0000000865	CDS	chr2	112656191:112786945	+	MERTK	NM_006343	1063.21	900.878	1235.69	1.37165	0.45591	1.37293	0.457259	0.00013961	0.00817181
TRCN0000000864	CDS	chr2	112656191:112786945	+	MERTK	NM_006343	1210.41	1137.59	1287.79	1.13203	0.178918	1.15963	0.21366	0.00486179	0.0251975
TRCN0000000862	3UTR	chr2	112656191:112786945	+	MERTK	NM_006343	934.155	869.895	1002.43	1.15236	0.204588	1.19202	0.253404	0.043798	0.0940406
TRCN0000000863	CDS	chr2	112656191:112786945	+	MERTK	NM_006343	124.638	118.875	130.76	1.09998	0.137474	0.899701	-0.152482	0.168107	0.254062
TRCN0000000866	CDS	chr2	112656191:112786945	+	MERTK	NM_006343	1458.89	1433.63	1485.73	1.03634	0.051495	1.05192	0.0730286	0.418647	0.514494
TRCN0000040046	CDS	chr7	116312459:116438440	+	MET	NM_000245	7932.09	8674.06	7143.75	0.823577	-0.280025	0.831566	-0.266098	0.00255729	0.01904
TRCN0000040044	CDS	chr7	116312459:116438440	+	MET	NM_000245	5668.14	5985.13	5331.33	0.890763	-0.166887	0.888748	-0.170154	0.0101503	0.0370658
TRCN0000040045	CDS	chr7	116312459:116438440	+	MET	NM_000245	4159.35	4299.79	4010.14	0.932638	-0.100611	0.927282	-0.108921	0.111885	0.185304
TRCN0000040043	3UTR	chr7	116312459:116438440	+	MET	NM_000245	3465.88	3505.62	3423.65	0.976619	-0.0341319	0.988987	-0.0159759	0.758617	0.821767
TRCN0000040047	CDS	chr7	116312459:116438440	+	MET	NM_000245	2324.52	2331.46	2317.14	0.993856	-0.0088918	0.997684	-0.00334479	0.959884	0.973157
TRCN0000007069	CDS	NA	NA:NA	NA	MGC42105	NM_153361	3999.39	3861.85	4145.52	1.07345	0.102258	1.07391	0.102877	0.0723382	0.134506
TRCN0000007071	CDS	NA	NA:NA	NA	MGC42105	NM_153361	7412.33	7342.32	7486.72	1.01967	0.0280984	1.01408	0.02017	0.734262	0.801449
TRCN0000007070	CDS	NA	NA:NA	NA	MGC42105	NM_153361	790.807	837.543	741.149	0.884909	-0.1764	0.878331	-0.187163	0.00472228	0.0249915
TRCN0000006240	CDS	chr17	4736635:4801356	+	MINK1	NM_015716	1324.88	1191.54	1466.56	1.23081	0.299612	1.28255	0.35901	0.00239565	0.0186586
TRCN0000006239	CDS	chr17	4736635:4801356	+	MINK1	NM_015716	2775.16	2785.97	2763.67	0.991997	-0.0115921	0.982234	-0.0258616	0.699582	0.774054
TRCN0000006238	CDS	chr17	4736635:4801356	+	MINK1	NM_015716	2138.63	2149.71	2126.85	0.989366	-0.0154243	0.996873	-0.0045191	0.940745	0.957953
TRCN0000006231	3UTR	chr1	47023079:47069966	-	MKNK1	NM_003684	2365.13	2306.99	2426.9	1.05198	0.0731025	1.04078	0.0576653	0.364298	0.462345
TRCN0000006233	CDS	chr1	47023079:47069966	-	MKNK1	NM_003684	4299.49	4834.43	3731.13	0.771783	-0.373733	0.788283	-0.343214	0.000971437	0.0132573
TRCN0000006232	CDS	chr1	47023079:47069966	-	MKNK1	NM_003684	2671.59	2879.62	2450.55	0.850998	-0.232772	0.860409	-0.216906	0.0133613	0.0430944
TRCN0000006234	CDS	chr1	47023079:47069966	-	MKNK1	NM_003684	2962.62	2983.94	2939.97	0.985265	-0.0214169	0.986049	-0.0202684	0.696381	0.772158
TRCN0000006100	CDS	chr19	2037470:2051243	-	MKNK2	NM_017572	1469.28	1363.83	1581.32	1.15947	0.213466	1.14106	0.190377	0.0353697	0.0803638
TRCN0000006098	CDS	chr19	2037470:2051243	-	MKNK2	NM_017572	980.72	961.58	1001.06	1.04105	0.0580435	1.06743	0.0941381	0.322208	0.420198
TRCN0000006099	CDS	chr19	2037470:2051243	-	MKNK2	NM_017572	3818.85	3992.14	3634.73	0.910473	-0.135312	0.920294	-0.119833	0.00244589	0.0189154
TRCN0000006097	CDS	chr19	2037470:2051243	-	MKNK2	NM_017572	3441.01	3577.31	3296.19	0.921414	-0.118078	0.919557	-0.120989	0.0679287	0.128505
TRCN0000006096	3UTR	chr19	2037470:2051243	-	MKNK2	NM_017572	5714.67	5787.82	5636.95	0.973934	-0.0381045	0.970771	-0.0427971	0.389003	0.485608
TRCN0000003224	CDS	chr16	74705753:74734789	-	MLKL	NM_152649	2296	1871	2747.56	1.4685	0.554339	1.3911	0.476228	4.47177e-05	0.00637819
TRCN0000003225	CDS	chr16	74705753:74734789	-	MLKL	NM_152649	1382.04	1279.89	1490.57	1.1646	0.219839	1.20045	0.263572	0.0122258	0.041293
TRCN0000003226	CDS	chr16	74705753:74734789	-	MLKL	NM_152649	985.506	912.375	1063.21	1.16532	0.220726	1.16519	0.220561	0.0411145	0.090146
TRCN0000003227	3UTR	chr16	74705753:74734789	-	MLKL	NM_152649	2075.99	2012.88	2143.03	1.06466	0.0903877	1.06654	0.0929431	0.0736239	0.136193
TRCN0000003228	CDS	chr16	74705753:74734789	-	MLKL	NM_152649	5834.2	6199.52	5446.04	0.878461	-0.18695	0.875164	-0.192375	0.0246206	0.0632559
TRCN0000001707	CDS	chr8	57025501:57026541	-	MOS	NM_005372	2210.76	2340.41	2073	0.885744	-0.175039	0.896729	-0.157256	0.0774548	0.141657
TRCN0000001705	CDS	chr8	57025501:57026541	-	MOS	NM_005372	4891.91	4945.9	4834.55	0.977487	-0.0328499	0.972405	-0.0403708	0.415898	0.511744
TRCN0000001706	CDS	chr8	57025501:57026541	-	MOS	NM_005372	3538.02	3569.03	3505.07	0.98208	-0.0260879	0.98984	-0.0147326	0.787565	0.844301
TRCN0000029674	CDS	chr17	60704762:60770962	+	MRC2	NM_006039	2504.02	2338.62	2679.75	1.14587	0.196438	1.16066	0.214945	0.00856443	0.0334984
TRCN0000029677	CDS	chr17	60704762:60770962	+	MRC2	NM_006039	1045.52	942.836	1154.62	1.22462	0.292335	1.24286	0.31366	0.00885814	0.0341817
TRCN0000029676	CDS	chr17	60704762:60770962	+	MRC2	NM_006039	3864.04	3779.77	3953.57	1.04598	0.0648583	1.05639	0.0791427	0.164273	0.249775
TRCN0000029675	CDS	chr17	60704762:60770962	+	MRC2	NM_006039	4622.63	5109.71	4105.11	0.803393	-0.315822	0.797499	-0.326445	5.30455e-05	0.00637819
TRCN0000029678	CDS	chr17	60704762:60770962	+	MRC2	NM_006039	2626.19	2775.32	2467.74	0.889173	-0.169464	0.875966	-0.191053	0.00121134	0.0141138
TRCN0000003107	CDS	chr3	49924436:49941306	-	MST1R	NM_002447	2549.71	2366.52	2744.35	1.15965	0.213695	1.17534	0.233076	0.00656215	0.0295539
TRCN0000003110	CDS	chr3	49924436:49941306	-	MST1R	NM_002447	1523.24	1505.28	1542.32	1.02461	0.0350695	1.04595	0.0648164	0.413183	0.509863
TRCN0000003106	CDS	chr3	49924436:49941306	-	MST1R	NM_002447	2379.72	2478.42	2274.85	0.917861	-0.123653	0.923526	-0.114775	0.0282506	0.0689297
TRCN0000003109	CDS	chr3	49924436:49941306	-	MST1R	NM_002447	5746.49	6084.97	5386.86	0.885272	-0.175807	0.889171	-0.169468	0.0380072	0.0850463
TRCN0000003108	3UTR	chr3	49924436:49941306	-	MST1R	NM_002447	3848.3	4016.62	3669.46	0.913568	-0.130416	0.925187	-0.112183	0.0939595	0.162545
TRCN0000003191	3UTR	chrX	131157245:131209971	+	MST4	NM_016542	213.617	194.15	234.301	1.2068	0.27119	1.17713	0.235279	0.0664075	0.126366
TRCN0000003192	CDS	chrX	131157245:131209971	+	MST4	NM_016542	617.615	595.069	641.571	1.07814	0.108551	1.10338	0.141935	0.17938	0.266939
TRCN0000003193	CDS	chrX	131157245:131209971	+	MST4	NM_016542	1798.87	1871.59	1721.6	0.919857	-0.120518	0.916363	-0.126008	0.0545673	0.109353
TRCN0000003194	CDS	chrX	131157245:131209971	+	MST4	NM_016542	1461.17	1532.07	1385.84	0.904556	-0.144719	0.89611	-0.158253	0.0888092	0.155623
TRCN0000003195	CDS	chrX	131157245:131209971	+	MST4	NM_016542	4233.26	4311.63	4149.99	0.962512	-0.0551236	0.967225	-0.0480768	0.367084	0.464417
TRCN0000038674	3UTR	chr1	11166588:11322608	-	MTOR	NM_004958	1003.19	854.182	1161.51	1.35979	0.443389	1.36127	0.444955	2.02415e-05	0.00553144
TRCN0000038676	CDS	chr1	11166588:11322608	-	MTOR	NM_004958	948.573	841.527	1062.31	1.26236	0.336122	1.28333	0.359896	0.00134305	0.0150546
TRCN0000038677	CDS	chr1	11166588:11322608	-	MTOR	NM_004958	475.665	414.07	541.11	1.30681	0.386048	1.35768	0.441146	0.00259992	0.0192497
TRCN0000039784	CDS	chr1	11166588:11322608	-	MTOR	NM_004958	1323.02	1212.4	1440.54	1.18817	0.248746	1.24161	0.312216	0.00334016	0.0215
TRCN0000039787	CDS	chr1	11166588:11322608	-	MTOR	NM_004958	1538.92	1416.89	1668.58	1.17764	0.235893	1.22481	0.292562	0.00998236	0.0368184
TRCN0000039786	CDS	chr1	11166588:11322608	-	MTOR	NM_004958	2672.58	2479.8	2877.4	1.16033	0.214541	1.1553	0.208267	0.0297468	0.0715923
TRCN0000038675	CDS	chr1	11166588:11322608	-	MTOR	NM_004958	2241.97	2223.77	2261.3	1.01688	0.0241443	1.00945	0.013566	0.830678	0.877395
TRCN0000038678	CDS	chr1	11166588:11322608	-	MTOR	NM_004958	5292.29	5871.87	4676.48	0.796421	-0.328397	0.809706	-0.30453	0.00218317	0.0179308
TRCN0000039785	CDS	chr1	11166588:11322608	-	MTOR	NM_004958	2952.67	3184.76	2706.07	0.849696	-0.234982	0.865465	-0.208453	0.0188103	0.0532427
TRCN0000039783	3UTR	chr1	11166588:11322608	-	MTOR	NM_004958	5507.84	5604.92	5404.69	0.964277	-0.0524804	0.975829	-0.0353003	0.561699	0.653432
TRCN0000002167	CDS	chr9	113431051:113563278	+	MUSK	NM_005592	800.909	738.991	866.697	1.17281	0.229972	1.20632	0.270613	0.000992909	0.0132573
TRCN0000002164	CDS	chr9	113431051:113563278	+	MUSK	NM_005592	549.127	484.885	617.383	1.27326	0.348524	1.28278	0.359276	0.00255463	0.01904
TRCN0000002166	CDS	chr9	113431051:113563278	+	MUSK	NM_005592	1698.77	1802.08	1589.01	0.881763	-0.181537	0.880214	-0.184074	0.0271458	0.06755
TRCN0000002165	CDS	chr9	113431051:113563278	+	MUSK	NM_005592	4145.89	4330.46	3949.79	0.912094	-0.132746	0.911708	-0.133356	0.147755	0.230369
TRCN0000010070	CDS	chr12	110011500:110035071	+	MVK	NM_000431	3351.7	2877.48	3855.56	1.33991	0.422133	1.30267	0.381474	0.0109892	0.0389088
TRCN0000010071	CDS	chr12	110011500:110035071	+	MVK	NM_000431	5489.42	5683.77	5282.94	0.929478	-0.105507	0.931873	-0.101794	0.140804	0.221716
TRCN0000000935	CDS	chr3	123331143:123603149	-	MYLK	NM_053028	233.458	197.581	271.578	1.37452	0.458923	1.30984	0.389391	0.00729907	0.0307995
TRCN0000000937	CDS	chr3	123331143:123603149	-	MYLK	NM_053028	1416.64	1383.02	1452.36	1.05014	0.0705858	1.07098	0.0989254	0.152589	0.235864
TRCN0000000936	CDS	chr3	123331143:123603149	-	MYLK	NM_053028	1938	1938.14	1937.86	0.999852	-0.000213851	1.00892	0.0128132	0.859577	0.900624
TRCN0000000934	CDS	chr20	30407178:30422500	+	MYLK2	NM_033118	1452.22	1295.81	1618.41	1.24895	0.320716	1.25248	0.324786	0.00058576	0.0116852
TRCN0000000932	3UTR	chr20	30407178:30422500	+	MYLK2	NM_033118	1479.98	1435.69	1527.04	1.06363	0.0889978	1.05863	0.0822017	0.285108	0.382831
TRCN0000000933	CDS	chr20	30407178:30422500	+	MYLK2	NM_033118	1718.23	1710.83	1726.1	1.00892	0.0128126	1.01779	0.0254403	0.752115	0.816489
TRCN0000001845	3UTR	chr16	46736194:46782221	-	MYLK3	NM_182493	1191.02	1106.46	1280.86	1.15762	0.211163	1.15621	0.209405	0.0660987	0.126151
TRCN0000001842	CDS	chr16	46736194:46782221	-	MYLK3	NM_182493	2138.76	2082.32	2198.73	1.0559	0.0784787	1.03867	0.0547341	0.437083	0.53366
TRCN0000001846	CDS	chr16	46736194:46782221	-	MYLK3	NM_182493	1321.05	1309.21	1333.63	1.01865	0.026665	1.03303	0.0468864	0.534313	0.628382
TRCN0000001843	CDS	chr16	46736194:46782221	-	MYLK3	NM_182493	1637.82	1718.15	1552.46	0.903567	-0.146296	0.906347	-0.141865	0.179665	0.267099
TRCN0000037447	CDS	chr6	2663863:2751154	-	MYLK4	XM_373109	3142.7	3015.58	3277.76	1.08694	0.120277	1.10256	0.140853	0.01312	0.0426365
TRCN0000037445	CDS	chr6	2663863:2751154	-	MYLK4	XM_373109	1845.68	1811.09	1882.44	1.0394	0.0557518	1.05321	0.0747974	0.211486	0.302152
TRCN0000037444	CDS	chr6	2663863:2751154	-	MYLK4	XM_373109	4161.16	4155.77	4166.88	1.00267	0.00385297	1.01723	0.0246475	0.711383	0.78359
TRCN0000037446	CDS	chr6	2663863:2751154	-	MYLK4	XM_373109	4096.06	4205.72	3979.55	0.946223	-0.0797477	0.942054	-0.0861176	0.118448	0.194141
TRCN0000037448	CDS	chr6	2663863:2751154	-	MYLK4	XM_373109	798.734	812.948	783.633	0.96394	-0.0529851	0.966658	-0.0489222	0.692031	0.767902
TRCN0000002200	CDS	chr10	26223002:26501465	+	MYO3A	NM_017433	589.314	559.335	621.166	1.11054	0.151267	1.12019	0.16374	0.181659	0.269396
TRCN0000002201	CDS	chr10	26223002:26501465	+	MYO3A	NM_017433	942.409	927.611	958.133	1.0329	0.0467066	1.06518	0.0911002	0.288595	0.385907
TRCN0000002197	CDS	chr10	26223002:26501465	+	MYO3A	NM_017433	905.439	943.55	864.946	0.916693	-0.125489	0.915525	-0.127329	0.146322	0.228372
TRCN0000002199	3UTR	chr10	26223002:26501465	+	MYO3A	NM_017433	1052.66	1074.37	1029.6	0.958332	-0.0614024	0.939434	-0.0901364	0.275808	0.373795
TRCN0000002198	CDS	chr10	26223002:26501465	+	MYO3A	NM_017433	842.364	847.196	837.229	0.988236	-0.0170726	1.00165	0.00238152	0.974876	0.984144
TRCN0000002402	CDS	chr2	171034655:171511674	+	MYO3B	NM_138995	755.561	717.424	796.081	1.10964	0.150089	1.17111	0.227876	0.0802595	0.145163
TRCN0000002404	CDS	chr2	171034655:171511674	+	MYO3B	NM_138995	2908.33	2884.13	2934.05	1.01731	0.0247599	1.01224	0.0175528	0.795526	0.850712
TRCN0000002401	CDS	chr2	171034655:171511674	+	MYO3B	NM_138995	3045.16	3036.3	3054.57	1.00602	0.00865284	1.00543	0.00781727	0.909008	0.93618
TRCN0000002403	3UTR	chr2	171034655:171511674	+	MYO3B	NM_138995	2655.22	2685.18	2623.38	0.976982	-0.0335966	0.971807	-0.0412583	0.540948	0.634448
TRCN0000002405	CDS	chr2	171034655:171511674	+	MYO3B	NM_138995	6242.44	6247.89	6236.66	0.998203	-0.00259483	0.99933	-0.00096631	0.982374	0.987794
TRCN0000037703	CDS	chr1	1682671:1711508	-	NADK	NM_023018	1611.96	1367.62	1871.57	1.36848	0.452574	1.35262	0.435753	0.000210538	0.00923895
TRCN0000037701	CDS	chr1	1682671:1711508	-	NADK	NM_023018	3492.12	3425.16	3563.27	1.04032	0.0570271	1.03266	0.0463586	0.45328	0.548977
TRCN0000037700	CDS	chr1	1682671:1711508	-	NADK	NM_023018	3862.11	4219.38	3482.52	0.825362	-0.276901	0.835023	-0.260111	0.00502211	0.0254578
TRCN0000037699	CDS	chr1	1682671:1711508	-	NADK	NM_023018	6357.67	6910.63	5770.15	0.834968	-0.260208	0.858179	-0.22065	0.0151738	0.0468531
TRCN0000037702	CDS	chr1	1682671:1711508	-	NADK	NM_023018	2199.06	2235.35	2160.5	0.966518	-0.0491317	0.969117	-0.0452578	0.43909	0.535458
TRCN0000037620	CDS	chr2	71295408:71305998	+	NAGK	NM_017567	1280.81	1150.96	1418.79	1.2327	0.301823	1.26633	0.340658	0.000650013	0.0120787
TRCN0000037619	CDS	chr2	71295408:71305998	+	NAGK	NM_017567	5479.33	5213.53	5761.75	1.10515	0.144247	1.11465	0.156585	0.00180414	0.0168197
TRCN0000037622	CDS	chr2	71295408:71305998	+	NAGK	NM_017567	6785.76	7249.69	6292.83	0.868013	-0.204212	0.866121	-0.20736	0.00264598	0.0192503
TRCN0000037621	CDS	chr2	71295408:71305998	+	NAGK	NM_017567	5365.81	5444.18	5282.53	0.970307	-0.0434872	0.973541	-0.038686	0.46255	0.557508
TRCN0000021583	CDS	chr4	170314421:170533778	-	NEK1	NM_012224	1145.18	979.093	1321.64	1.34986	0.432812	1.35375	0.436964	0.000167324	0.00861412
TRCN0000021579	3UTR	chr4	170314421:170533778	-	NEK1	NM_012224	4477.31	4253.82	4714.78	1.10836	0.148433	1.12084	0.164582	0.0083709	0.0333256
TRCN0000021581	CDS	chr4	170314421:170533778	-	NEK1	NM_012224	2628.56	2574.28	2686.23	1.04349	0.061412	1.04979	0.0701041	0.298139	0.395676
TRCN0000021582	CDS	chr4	170314421:170533778	-	NEK1	NM_012224	2133.36	2227.18	2033.67	0.913111	-0.131138	0.915142	-0.127932	0.0301717	0.0723254
TRCN0000002287	CDS	chr3	27257097:27410912	-	NEK10	NM_152534	1584.57	1387.58	1793.87	1.2928	0.370499	1.3115	0.391219	0.00188668	0.0168197
TRCN0000002291	CDS	chr3	27257097:27410912	-	NEK10	NM_152534	786.445	718.342	858.804	1.19554	0.257659	1.23626	0.305987	0.00468609	0.0249837
TRCN0000002288	CDS	chr3	27257097:27410912	-	NEK10	NM_152534	723.198	684.133	764.704	1.11777	0.160623	1.11219	0.153409	0.0993547	0.168925
TRCN0000002290	CDS	chr3	27257097:27410912	-	NEK10	NM_152534	330.729	353.543	306.49	0.866911	-0.206044	0.898555	-0.154321	0.214351	0.30523
TRCN0000001965	CDS	chr3	130745694:131069309	+	NEK11	NM_024800	1080.18	1077.23	1083.31	1.00565	0.00812255	1.00166	0.00238807	0.9783	0.985512
TRCN0000001964	3UTR	chr3	130745694:131069309	+	NEK11	NM_024800	8830.07	9300.65	8330.09	0.895646	-0.159	0.891066	-0.166395	0.0646522	0.124023
TRCN0000001963	CDS	chr3	130745694:131069309	+	NEK11	NM_024800	1600.45	1698.64	1496.11	0.88077	-0.183162	0.89495	-0.160121	0.0847345	0.150371
TRCN0000001962	CDS	chr3	130745694:131069309	+	NEK11	NM_024800	386.059	407.865	362.89	0.88973	-0.168561	0.912852	-0.131547	0.297731	0.395309
TRCN0000001961	CDS	chr3	130745694:131069309	+	NEK11	NM_024800	210.991	212.961	208.897	0.980918	-0.027795	0.981045	-0.0276094	0.823084	0.872115
TRCN0000000948	3UTR	chr1	211831599:211848972	-	NEK2	NM_002497	944.171	911.981	978.374	1.0728	0.101383	1.09611	0.132397	0.120594	0.196586
TRCN0000000952	CDS	chr1	211831599:211848972	-	NEK2	NM_002497	4615.61	4905.06	4308.07	0.878291	-0.187229	0.88741	-0.172327	0.0182414	0.0521729
TRCN0000000951	CDS	chr1	211831599:211848972	-	NEK2	NM_002497	2460.29	2595.38	2316.76	0.892651	-0.163833	0.888346	-0.170806	0.0506397	0.103752
TRCN0000000950	CDS	chr1	211831599:211848972	-	NEK2	NM_002497	4003.77	4060.78	3943.18	0.97104	-0.042397	0.975101	-0.0363762	0.53288	0.626942
TRCN0000000949	CDS	chr1	211831599:211848972	-	NEK2	NM_002497	24.7641	24.775	24.7524	0.999088	-0.00131629	1.0029	0.00417438	0.968978	0.981054
TRCN0000001472	CDS	chr13	52706779:52733996	-	NEK3	NM_152720	1882	1773.49	1997.3	1.1262	0.171466	1.14714	0.198037	0.0201214	0.055644
TRCN0000001474	CDS	chr13	52706779:52733996	-	NEK3	NM_152720	1202.18	1147.13	1260.67	1.09897	0.136156	1.10904	0.149312	0.0719877	0.134124
TRCN0000001475	CDS	chr13	52706779:52733996	-	NEK3	NM_152720	1526.91	1476.27	1580.71	1.07075	0.0986237	1.07575	0.105341	0.133183	0.212386
TRCN0000001473	CDS	chr13	52706779:52733996	-	NEK3	NM_152720	5085.81	5359	4795.55	0.89486	-0.160266	0.886402	-0.173967	0.0302118	0.0723491
TRCN0000001471	3UTR	chr13	52706779:52733996	-	NEK3	NM_152720	1572.31	1598.49	1544.5	0.966227	-0.0495657	0.958185	-0.061624	0.458946	0.554499
TRCN0000001697	3UTR	chr3	52744796:52804965	-	NEK4	NM_003157	1785.7	1558.54	2027.06	1.30061	0.379192	1.27985	0.35597	0.00616875	0.0285281
TRCN0000001698	CDS	chr3	52744796:52804965	-	NEK4	NM_003157	7206.38	7707.06	6674.41	0.866013	-0.207539	0.863129	-0.212352	0.00345437	0.0217353
TRCN0000001696	CDS	chr3	52744796:52804965	-	NEK4	NM_003157	3425.02	3572.94	3267.85	0.914609	-0.128773	0.91619	-0.126281	0.128674	0.206621
TRCN0000001695	CDS	chr3	52744796:52804965	-	NEK4	NM_003157	2792.16	2904.01	2673.32	0.920559	-0.119417	0.92487	-0.112678	0.136522	0.216334
TRCN0000001699	CDS	chr3	52744796:52804965	-	NEK4	NM_003157	2543.6	2554.54	2531.97	0.991164	-0.0128036	0.995877	-0.00596016	0.921326	0.946192
TRCN0000021409	3UTR	chr13	52638900:52703214	-	NEK5	XM_292160	791.582	695.334	893.844	1.28549	0.362317	1.31544	0.39554	0.00130365	0.0147878
TRCN0000021410	CDS	chr13	52638900:52703214	-	NEK5	XM_292160	460.496	398.066	526.827	1.32347	0.404322	1.30592	0.385066	0.0121311	0.0410774
TRCN0000021413	CDS	chr13	52638900:52703214	-	NEK5	XM_292160	2246.38	2367.49	2117.7	0.894495	-0.160855	0.900783	-0.150749	0.0652834	0.124915
TRCN0000021411	CDS	chr13	52638900:52703214	-	NEK5	XM_292160	829.222	859.85	796.68	0.926534	-0.110085	0.943585	-0.0837753	0.347365	0.444582
TRCN0000021412	CDS	chr13	52638900:52703214	-	NEK5	XM_292160	2384.2	2435.65	2329.55	0.956439	-0.0642545	0.944262	-0.0827408	0.355912	0.453719
TRCN0000001726	3UTR	chr9	127019885:127114719	+	NEK6	NM_014397	2223.79	2099.19	2356.19	1.12243	0.166621	1.14674	0.197542	0.110033	0.183449
TRCN0000001724	CDS	chr9	127019885:127114719	+	NEK6	NM_014397	5568.57	5567.9	5569.28	1.00025	0.000356832	0.984986	-0.0218247	0.608568	0.692413
TRCN0000001723	CDS	chr9	127019885:127114719	+	NEK6	NM_014397	12292.7	13152.1	11379.5	0.865226	-0.208851	0.867912	-0.204379	0.00871156	0.0339209
TRCN0000001727	CDS	chr9	127019885:127114719	+	NEK6	NM_014397	4304.82	4498.9	4098.61	0.911025	-0.134437	0.911118	-0.13429	0.0404839	0.0890931
TRCN0000001725	CDS	chr9	127019885:127114719	+	NEK6	NM_014397	4893.1	5088.71	4685.26	0.920717	-0.11917	0.927803	-0.108109	0.131639	0.210383
TRCN0000001967	CDS	chr1	198126108:198291548	+	NEK7	NM_133494	352.311	309.429	397.873	1.28583	0.362698	1.30016	0.378689	0.00989502	0.0366311
TRCN0000001968	CDS	chr1	198126108:198291548	+	NEK7	NM_133494	514.697	506.166	523.761	1.03476	0.0492989	1.03713	0.0525986	0.593106	0.679968
TRCN0000007089	CDS	chr17	27055832:27069784	+	NEK8	NM_178170	2166.63	1948.37	2398.53	1.23105	0.299886	1.25705	0.33004	0.00164287	0.0162221
TRCN0000007091	CDS	chr17	27055832:27069784	+	NEK8	NM_178170	1288.46	1144.33	1441.61	1.25979	0.333184	1.26748	0.341966	0.00607719	0.0283598
TRCN0000007088	CDS	chr17	27055832:27069784	+	NEK8	NM_178170	2187.88	2137.84	2241.05	1.04828	0.0680199	1.06479	0.0905754	0.119111	0.194834
TRCN0000007087	3UTR	chr17	27055832:27069784	+	NEK8	NM_178170	2676.55	2609.89	2747.39	1.05268	0.0740696	1.05469	0.0768168	0.189617	0.278129
TRCN0000007090	CDS	chr17	27055832:27069784	+	NEK8	NM_178170	3702.36	3775.61	3624.54	0.959988	-0.0589112	0.960303	-0.0584379	0.370515	0.467773
TRCN0000000928	CDS	chr14	75548818:75593778	-	NEK9	NM_033116	1664.89	1482.39	1858.8	1.25392	0.326448	1.25911	0.332403	0.000730169	0.0127328
TRCN0000000929	CDS	chr14	75548818:75593778	-	NEK9	NM_033116	1701.79	1558.6	1853.92	1.18948	0.250329	1.19641	0.258711	0.00586669	0.0276849
TRCN0000000930	CDS	chr14	75548818:75593778	-	NEK9	NM_033116	2111.11	2235.2	1979.26	0.885497	-0.175441	0.879012	-0.186046	0.0428792	0.0931322
TRCN0000002069	CDS	chr17	26369688:26523404	+	NLK	NM_016231	1786.98	1667.76	1913.66	1.14744	0.198424	1.16549	0.220936	0.0365203	0.0822938
TRCN0000002067	CDS	chr17	26369688:26523404	+	NLK	NM_016231	331.801	299.433	366.192	1.22295	0.290367	1.21455	0.280421	0.0586441	0.115294
TRCN0000002071	3UTR	chr17	26369688:26523404	+	NLK	NM_016231	837.636	803.415	873.997	1.08785	0.121484	1.0833	0.115433	0.190116	0.278503
TRCN0000002070	CDS	chr17	26369688:26523404	+	NLK	NM_016231	958.089	1076.79	831.972	0.772642	-0.372128	0.834158	-0.261607	0.0190234	0.0534434
TRCN0000002068	CDS	chr17	26369688:26523404	+	NLK	NM_016231	440.596	453.469	426.919	0.941453	-0.087039	0.942001	-0.0861988	0.504328	0.598976
TRCN0000010055	CDS	chr17	49230920:49239450	+	NME1	NM_000269	3459.53	3302.71	3626.15	1.09793	0.13479	1.12295	0.167288	0.00659702	0.0295539
TRCN0000010061	CDS	chr17	49230920:49239450	+	NME1	NM_000269	3829.83	3649.56	4021.37	1.10188	0.139962	1.09505	0.131	0.0391883	0.0871947
TRCN0000010062	CDS	chr17	49230920:49239450	+	NME1	NM_000269	314.845	277.57	354.451	1.27698	0.352736	1.10168	0.139704	0.144879	0.226709
TRCN0000010063	CDS	chr17	49230920:49239450	+	NME1	NM_000269	6596	7404.76	5736.7	0.774732	-0.368232	0.802049	-0.318238	0.000320615	0.0100393
TRCN0000010064	CDS	chr17	49230920:49239450	+	NME1	NM_000269	450.866	509.416	388.656	0.762944	-0.39035	0.801519	-0.31919	0.00939263	0.0352928
TRCN0000010110	CDS	chr17	49242796:49249105	+	NME2	NM_002512	1803.07	1631.99	1984.85	1.21622	0.282398	1.22801	0.296328	0.00171446	0.0164601
TRCN0000010109	CDS	chr17	49242796:49249105	+	NME2	NM_002512	711.972	683.931	741.766	1.08456	0.117113	1.0857	0.118629	0.176163	0.263587
TRCN0000010102	CDS	chr17	49242796:49249105	+	NME2	NM_002512	1514.09	1465.28	1565.95	1.06871	0.0958688	1.07792	0.10825	0.178932	0.266536
TRCN0000010108	CDS	chr17	49242796:49249105	+	NME2	NM_002512	3259.32	3379.01	3132.14	0.926941	-0.109451	0.927602	-0.108422	0.141336	0.222321
TRCN0000037747	CDS	chr16	1820321:1821710	-	NME3	NM_002513	1136.64	1064.73	1213.05	1.1393	0.188151	1.14664	0.197409	0.048384	0.100542
TRCN0000037745	CDS	chr16	1820321:1821710	-	NME3	NM_002513	681.672	667.108	697.147	1.04503	0.0635426	1.02049	0.0292615	0.785396	0.842582
TRCN0000037744	3UTR	chr16	1820321:1821710	-	NME3	NM_002513	4440.72	4532.77	4342.92	0.958116	-0.0617279	0.9613	-0.0569412	0.307661	0.40634
TRCN0000037746	CDS	chr16	1820321:1821710	-	NME3	NM_002513	2166.95	2172.84	2160.69	0.994411	-0.00808642	0.998726	-0.00183849	0.977924	0.985464
TRCN0000010170	CDS	chr16	446755:450754	+	NME4	NM_005009	1686.62	1677.6	1696.2	1.01108	0.0159037	1.02376	0.0338717	0.595119	0.681497
TRCN0000010167	CDS	chr16	446755:450754	+	NME4	NM_005009	9137.42	9795.25	8438.47	0.861486	-0.2151	0.871556	-0.198335	0.00164571	0.0162221
TRCN0000010166	CDS	chr16	446755:450754	+	NME4	NM_005009	6760.23	7265.62	6223.25	0.856533	-0.223419	0.868474	-0.203445	0.0242274	0.062689
TRCN0000010168	CDS	chr16	446755:450754	+	NME4	NM_005009	7587.59	7930.17	7223.6	0.910901	-0.134634	0.905715	-0.142871	0.0661493	0.126151
TRCN0000010169	CDS	chr16	446755:450754	+	NME4	NM_005009	4242.94	4432.88	4041.13	0.911626	-0.133487	0.929073	-0.106136	0.0666179	0.126551
TRCN0000006175	CDS	chr5	137450861:137475132	-	NME5	NM_003551	604.375	554.533	657.332	1.18538	0.245348	1.17479	0.232398	0.0153178	0.0470811
TRCN0000006174	CDS	chr5	137450861:137475132	-	NME5	NM_003551	1055.74	984.479	1131.46	1.1493	0.200756	1.18036	0.23923	0.0169194	0.0498626
TRCN0000006173	3UTR	chr5	137450861:137475132	-	NME5	NM_003551	583.608	532.494	637.915	1.19798	0.260598	1.16512	0.220478	0.0218324	0.0584713
TRCN0000006177	CDS	chr5	137450861:137475132	-	NME5	NM_003551	530.197	510.6	551.02	1.07916	0.109912	1.12132	0.165199	0.204498	0.294545
TRCN0000006176	CDS	chr5	137450861:137475132	-	NME5	NM_003551	1186.22	1211.37	1159.5	0.957188	-0.0631259	0.961342	-0.0568779	0.484776	0.578498
TRCN0000010182	CDS	chr3	48335589:48342848	-	NME6	NM_005793	1676.43	1546.93	1814.03	1.17266	0.229786	1.18414	0.243834	0.0263636	0.066151
TRCN0000010191	CDS	chr3	48335589:48342848	-	NME6	NM_005793	3803.63	3639.29	3978.23	1.09314	0.128472	1.11457	0.156481	0.0437763	0.0940406
TRCN0000010190	CDS	chr3	48335589:48342848	-	NME6	NM_005793	4314.82	4143.44	4496.91	1.08531	0.118104	1.08821	0.121962	0.0706284	0.132776
TRCN0000010188	CDS	chr3	48335589:48342848	-	NME6	NM_005793	4633.85	4961.92	4285.27	0.863632	-0.211511	0.868779	-0.202939	5.09785e-05	0.00637819
TRCN0000010189	CDS	chr3	48335589:48342848	-	NME6	NM_005793	7284.27	7950.86	6576.03	0.827083	-0.273895	0.831227	-0.266685	0.00317486	0.0211748
TRCN0000010221	CDS	chr1	169101768:169337201	-	NME7	NM_013330	5703.95	5076.23	6370.91	1.25505	0.327742	1.31809	0.398449	0.000891688	0.0131476
TRCN0000010224	CDS	chr1	169101768:169337201	-	NME7	NM_013330	12200.9	11971.3	12444.8	1.03955	0.0559629	1.04419	0.062382	0.0682753	0.128998
TRCN0000010223	CDS	chr1	169101768:169337201	-	NME7	NM_013330	9469.66	10040	8863.67	0.882836	-0.179783	0.881999	-0.181151	0.0154683	0.0473019
TRCN0000010225	CDS	chr1	169101768:169337201	-	NME7	NM_013330	7395.89	7811.45	6954.36	0.890278	-0.167672	0.893878	-0.16185	0.0213501	0.0577477
TRCN0000010222	CDS	chr1	169101768:169337201	-	NME7	NM_013330	9141.62	9555.95	8701.4	0.910573	-0.135153	0.913779	-0.130082	0.0331386	0.0769819
TRCN0000007327	CDS	chr1	153651164:153666468	+	NPR1	NM_000906	979.762	918.318	1045.05	1.138	0.1865	1.16736	0.223255	0.00540697	0.0264151
TRCN0000007329	CDS	chr1	153651164:153666468	+	NPR1	NM_000906	289.735	265.71	315.261	1.18648	0.246693	1.18713	0.247478	0.0501592	0.103132
TRCN0000007325	3UTR	chr1	153651164:153666468	+	NPR1	NM_000906	661.957	616.252	710.518	1.15297	0.205351	1.14392	0.193985	0.0754163	0.13874
TRCN0000007328	CDS	chr1	153651164:153666468	+	NPR1	NM_000906	1306.98	1258.86	1358.11	1.07885	0.10949	1.09263	0.127808	0.0891645	0.155765
TRCN0000007326	CDS	chr1	153651164:153666468	+	NPR1	NM_000906	1946.13	1998.52	1890.47	0.945935	-0.0801874	0.955386	-0.0658441	0.345961	0.443102
TRCN0000001314	CDS	chr9	35792406:35809728	+	NPR2	NM_003995	678.719	588.432	774.649	1.31646	0.396668	1.28749	0.364557	0.00813524	0.0329132
TRCN0000000428	CDS	chr9	35792406:35809728	+	NPR2	NM_000907	1611.8	1547.43	1680.2	1.0858	0.118755	1.11396	0.155691	0.0794405	0.144376
TRCN0000000430	CDS	chr9	35792406:35809728	+	NPR2	NM_000907	870.323	867.697	873.113	1.00624	0.00897858	1.01531	0.0219222	0.805493	0.858116
TRCN0000000429	CDS	chr9	35792406:35809728	+	NPR2	NM_000907	4211.71	4477.09	3929.74	0.877744	-0.188128	0.879514	-0.185221	0.000569378	0.0116432
TRCN0000000427	3UTR	chr9	35792406:35809728	+	NPR2	NM_000907	1818.3	1932.19	1697.29	0.878429	-0.187003	0.883711	-0.178353	0.0440166	0.0942884
TRCN0000001437	3UTR	chr2	27651473:27665124	+	NRBP1	NM_013392	1348.16	1160.56	1547.48	1.33339	0.415104	1.28689	0.36389	0.0147401	0.0459633
TRCN0000001440	CDS	chr2	27651473:27665124	+	NRBP1	NM_013392	5492.69	6068.3	4881.11	0.804362	-0.314083	0.810363	-0.303361	0.000256196	0.00977013
TRCN0000001441	CDS	chr2	27651473:27665124	+	NRBP1	NM_013392	2457.81	2603.49	2303.03	0.884595	-0.176912	0.887012	-0.172975	0.00298836	0.020636
TRCN0000001438	CDS	chr2	27651473:27665124	+	NRBP1	NM_013392	1308.96	1404.75	1207.19	0.859358	-0.218669	0.869806	-0.201235	0.0136866	0.0438612
TRCN0000001439	CDS	chr2	27651473:27665124	+	NRBP1	NM_013392	945.257	1004.4	882.421	0.878558	-0.18679	0.909	-0.137648	0.215803	0.306933
TRCN0000021400	CDS	chr8	144915755:144923146	-	NRBP2	NM_178564	2201.28	2135.13	2271.56	1.0639	0.0893602	1.06383	0.0892659	0.115187	0.189831
TRCN0000021402	CDS	chr8	144915755:144923146	-	NRBP2	NM_178564	679.486	646.723	714.296	1.10448	0.143374	1.09895	0.13612	0.226325	0.318359
TRCN0000021399	3UTR	chr8	144915755:144923146	-	NRBP2	NM_178564	7945.51	8569.08	7282.97	0.849913	-0.234613	0.851979	-0.23111	0.00745636	0.031217
TRCN0000021403	CDS	chr8	144915755:144923146	-	NRBP2	NM_178564	4258.77	4288.95	4226.71	0.985489	-0.0210889	0.986248	-0.0199775	0.748614	0.813276
TRCN0000037492	CDS	chrX	105066536:105202602	+	NRK	NM_198465	4011.04	3916.49	4111.49	1.04979	0.0700996	1.05444	0.0764799	0.0792926	0.144294
TRCN0000037493	CDS	chrX	105066536:105202602	+	NRK	NM_198465	7286	7708.28	6837.34	0.887012	-0.172974	0.887411	-0.172326	0.0015021	0.0157265
TRCN0000037490	CDS	chrX	105066536:105202602	+	NRK	NM_198465	5293.93	5805.36	4750.53	0.818302	-0.289295	0.83413	-0.261657	0.00270435	0.0194409
TRCN0000037491	CDS	chrX	105066536:105202602	+	NRK	NM_198465	9215.06	10070.7	8305.91	0.824759	-0.277956	0.846802	-0.239903	0.0108887	0.0386896
TRCN0000037489	CDS	chrX	105066536:105202602	+	NRK	NM_198465	54.3995	58.2769	50.2797	0.862772	-0.212949	0.94013	-0.0890677	0.562215	0.653526
TRCN0000001993	CDS	chr1	156785542:156851642	+	NTRK1	NM_002529	655.734	555.961	761.743	1.37014	0.454319	1.34123	0.423556	0.00216649	0.0179308
TRCN0000001995	CDS	chr1	156785542:156851642	+	NTRK1	NM_002529	2120.69	2107.37	2134.85	1.01304	0.0186923	1.02144	0.0306006	0.665409	0.744406
TRCN0000001996	CDS	chr1	156785542:156851642	+	NTRK1	NM_002529	1581.25	1703.72	1451.13	0.85174	-0.231516	0.856806	-0.22296	0.00838105	0.0333256
TRCN0000001992	CDS	chr1	156785542:156851642	+	NTRK1	NM_002529	3074.77	3146.6	2998.46	0.952922	-0.0695703	0.948949	-0.0755978	0.274097	0.37198
TRCN0000002243	CDS	chr9	87283373:87641985	+	NTRK2	NM_006180	2564.02	2330.28	2812.36	1.20687	0.271275	1.21916	0.285885	0.000610235	0.0118142
TRCN0000002246	3UTR	chr9	87283373:87641985	+	NTRK2	NM_006180	1611.55	1377.56	1860.18	1.35035	0.433329	1.33263	0.41428	0.00391142	0.0228027
TRCN0000002242	CDS	chr9	87283373:87641985	+	NTRK2	NM_006180	3697.76	3621.27	3779.02	1.04356	0.0615182	1.05405	0.0759485	0.24889	0.344458
TRCN0000002245	CDS	chr9	87283373:87641985	+	NTRK2	NM_006180	2381.97	2503.09	2253.29	0.900202	-0.15168	0.889047	-0.169669	0.0101606	0.0370658
TRCN0000002244	CDS	chr9	87283373:87641985	+	NTRK2	NM_006180	2804.35	2952.72	2646.7	0.896361	-0.157848	0.895015	-0.160016	0.0373138	0.0838307
TRCN0000002312	3UTR	chr15	88419988:88799962	-	NTRK3	NM_002530	1785.52	1723.23	1851.69	1.07455	0.103728	1.07284	0.101432	0.111115	0.184537
TRCN0000002313	CDS	chr15	88419988:88799962	-	NTRK3	NM_002530	8406.41	8787.32	8001.69	0.910595	-0.135118	0.901685	-0.149305	0.00788327	0.032241
TRCN0000002309	CDS	chr15	88419988:88799962	-	NTRK3	NM_002530	1897.61	2033.74	1752.97	0.861944	-0.214333	0.867923	-0.204361	0.0164184	0.0489577
TRCN0000002311	CDS	chr15	88419988:88799962	-	NTRK3	NM_002530	1218.86	1251.92	1183.74	0.945539	-0.0807906	0.935608	-0.0960241	0.133419	0.212538
TRCN0000002310	CDS	chr15	88419988:88799962	-	NTRK3	NM_002530	21.1044	26.2633	15.6231	0.594865	-0.749365	0.957844	-0.0621367	0.48382	0.577587
TRCN0000000899	3UTR	chr12	106457125:106533811	-	NUAK1	NM_014840	1107.09	1009.13	1211.18	1.20021	0.263289	1.22535	0.293189	0.00750601	0.0312941
TRCN0000000900	CDS	chr12	106457125:106533811	-	NUAK1	NM_014840	119.767	87.9366	153.587	1.74657	0.804525	1.2234	0.2909	0.0524827	0.106309
TRCN0000000903	CDS	chr12	106457125:106533811	-	NUAK1	NM_014840	11552.4	11405.5	11708.5	1.02656	0.0378196	1.02159	0.0308213	0.424437	0.520546
TRCN0000000902	CDS	chr12	106457125:106533811	-	NUAK1	NM_014840	1976.98	2175.5	1766.05	0.811793	-0.300817	0.814284	-0.296397	0.00149867	0.0157265
TRCN0000000901	CDS	chr12	106457125:106533811	-	NUAK1	NM_014840	2939.44	3041.02	2831.51	0.931105	-0.102984	0.942256	-0.0858088	0.259356	0.356481
TRCN0000003207	CDS	chr1	205271191:205290883	-	NUAK2	NM_030952	1173.6	1126.36	1223.8	1.0865	0.119695	1.09704	0.133618	0.0742509	0.137184
TRCN0000003208	CDS	chr1	205271191:205290883	-	NUAK2	NM_030952	873.234	827.641	921.678	1.11362	0.155258	1.10319	0.141678	0.10254	0.173459
TRCN0000003206	3UTR	chr1	205271191:205290883	-	NUAK2	NM_030952	2895.4	3101.73	2676.18	0.862803	-0.212896	0.874745	-0.193066	0.0469552	0.098361
TRCN0000003205	CDS	chr1	205271191:205290883	-	NUAK2	NM_030952	1270.52	1354.69	1181.09	0.871855	-0.19784	0.870272	-0.200461	0.048499	0.100544
TRCN0000021599	3UTR	chr1	228395831:228566575	+	OBSCN	NM_052843	671.411	556.592	793.406	1.42547	0.511441	1.39101	0.476128	0.000681978	0.0121303
TRCN0000021600	CDS	chr1	228395831:228566575	+	OBSCN	NM_052843	2808.38	2587.26	3043.32	1.17627	0.234218	1.16528	0.220682	0.000937874	0.0132161
TRCN0000021601	CDS	chr1	228395831:228566575	+	OBSCN	NM_052843	72.0833	61.5758	83.2474	1.35195	0.435042	1.11008	0.150668	0.233157	0.327051
TRCN0000021603	CDS	chr1	228395831:228566575	+	OBSCN	NM_052843	99.6771	87.6444	112.462	1.28316	0.359701	1.02007	0.0286625	0.80878	0.860295
TRCN0000021602	CDS	chr1	228395831:228566575	+	OBSCN	NM_052843	1350.78	1354.73	1346.58	0.993984	-0.00870549	1.00455	0.00655418	0.911558	0.938084
TRCN0000001586	3UTR	chr3	38207026:38296979	+	OXSR1	NM_005109	2058.41	2029.84	2088.78	1.02904	0.0412954	1.04558	0.064307	0.382548	0.479341
TRCN0000001587	CDS	chr3	38207026:38296979	+	OXSR1	NM_005109	2512.02	2537.49	2484.97	0.9793	-0.0301779	0.973851	-0.0382267	0.608166	0.692413
TRCN0000001588	CDS	chr3	38207026:38296979	+	OXSR1	NM_005109	1432.39	1439.06	1425.31	0.990442	-0.0138549	1.01359	0.0194736	0.781929	0.840056
TRCN0000038014	CDS	chr6	34433838:34503000	+	PACSIN1	NM_020804	830.303	812.205	849.531	1.04596	0.0648221	1.06091	0.0853007	0.285149	0.382831
TRCN0000038018	CDS	chr6	34433838:34503000	+	PACSIN1	NM_020804	5043.53	5544.26	4511.5	0.813724	-0.297389	0.838345	-0.254384	0.00218328	0.0179308
TRCN0000038017	CDS	chr6	34433838:34503000	+	PACSIN1	NM_020804	5254.6	5769.52	4707.5	0.815925	-0.293492	0.831313	-0.266536	0.00614857	0.0285059
TRCN0000038015	CDS	chr6	34433838:34503000	+	PACSIN1	NM_020804	2046.09	2134.5	1952.15	0.914571	-0.128833	0.930232	-0.104338	0.0837441	0.14922
TRCN0000038016	CDS	chr6	34433838:34503000	+	PACSIN1	NM_020804	5131.95	5305.56	4947.49	0.932509	-0.10081	0.938258	-0.0919441	0.169917	0.256025
TRCN0000002227	3UTR	chr11	77033060:77185108	-	PAK1	NM_002576	458.55	399.551	521.237	1.30456	0.383558	1.30821	0.387593	0.0026457	0.0192503
TRCN0000002225	CDS	chr11	77033060:77185108	-	PAK1	NM_002576	1464.63	1657.68	1259.5	0.759798	-0.396313	0.778607	-0.361034	0.00101535	0.0132573
TRCN0000002224	CDS	chr11	77033060:77185108	-	PAK1	NM_002576	553.659	576.538	529.351	0.918153	-0.123193	0.927869	-0.108008	0.263277	0.361131
TRCN0000002226	CDS	chr11	77033060:77185108	-	PAK1	NM_002576	1254.94	1287.39	1220.45	0.948007	-0.07703	0.957842	-0.0621404	0.539259	0.632714
TRCN0000002115	3UTR	chr3	196466728:196559518	+	PAK2	NM_002577	1081.57	1039.83	1125.92	1.0828	0.114766	1.1062	0.145612	0.12265	0.199289
TRCN0000002114	CDS	chr3	196466728:196559518	+	PAK2	NM_002577	2250.21	2195.8	2308.02	1.05111	0.0719113	1.06951	0.0969459	0.157169	0.241102
TRCN0000002116	CDS	chr3	196466728:196559518	+	PAK2	NM_002577	552.974	611.846	490.423	0.801547	-0.31914	0.820965	-0.284607	0.0155343	0.0474555
TRCN0000002118	CDS	chr3	196466728:196559518	+	PAK2	NM_002577	1105.62	1188.3	1017.76	0.856484	-0.223501	0.866071	-0.207442	0.0406356	0.0892913
TRCN0000002117	CDS	chr3	196466728:196559518	+	PAK2	NM_002577	1320.42	1326.55	1313.92	0.990479	-0.0138013	1.00642	0.00923107	0.897456	0.929001
TRCN0000003246	CDS	chrX	110187513:110464173	+	PAK3	NM_002578	1335.03	1270.83	1403.24	1.10419	0.142985	1.10465	0.143592	0.0709451	0.133039
TRCN0000003244	CDS	chrX	110187513:110464173	+	PAK3	NM_002578	3507.78	3862.79	3130.58	0.810445	-0.303214	0.825245	-0.277105	0.00662747	0.0296209
TRCN0000003245	CDS	chrX	110187513:110464173	+	PAK3	NM_002578	2072.8	2114.57	2028.42	0.959258	-0.0600092	0.954056	-0.0678542	0.148012	0.230542
TRCN0000003242	CDS	chrX	110187513:110464173	+	PAK3	NM_002578	580.278	608.759	550.017	0.903505	-0.146396	0.911047	-0.134403	0.26667	0.364966
TRCN0000003243	CDS	chrX	110187513:110464173	+	PAK3	NM_002578	767.112	785.995	747.05	0.950451	-0.0733155	0.964418	-0.0522697	0.566705	0.656967
TRCN0000010198	CDS	chr19	39616420:39670046	+	PAK4	NM_005884	6143.83	6807.86	5438.29	0.798826	-0.324047	0.820176	-0.285994	0.00356773	0.0218849
TRCN0000010199	CDS	chr19	39616420:39670046	+	PAK4	NM_005884	4394.66	4571.32	4206.97	0.920296	-0.119831	0.927338	-0.108833	0.0287753	0.0699827
TRCN0000010200	CDS	chr19	39616420:39670046	+	PAK4	NM_005884	5618.07	5730.61	5498.49	0.959495	-0.0596532	0.947001	-0.0785614	0.160467	0.244731
TRCN0000010197	CDS	chr19	39616420:39670046	+	PAK4	NM_005884	5422.8	5588.56	5246.68	0.938825	-0.0910722	0.941179	-0.0874586	0.254124	0.35025
TRCN0000010201	CDS	chr19	39616420:39670046	+	PAK4	NM_005884	4033.91	4091.75	3972.45	0.970844	-0.0426887	0.967777	-0.047253	0.324162	0.422015
TRCN0000001751	CDS	chr15	40509629:40569688	+	PAK6	NM_020168	1950.04	1823.58	2084.41	1.14303	0.192866	1.1436	0.193582	0.0161208	0.0484792
TRCN0000001749	3UTR	chr15	40509629:40569688	+	PAK6	NM_020168	1143.99	1099.93	1190.81	1.08263	0.114539	1.09086	0.125469	0.0490635	0.101574
TRCN0000001750	CDS	chr15	40509629:40569688	+	PAK6	NM_020168	5015.12	5220.06	4797.37	0.919026	-0.121822	0.930726	-0.103571	0.0733978	0.135942
TRCN0000001747	CDS	chr15	40509629:40569688	+	PAK6	NM_020168	5383.23	5467.79	5293.38	0.968103	-0.0467673	0.963573	-0.0535338	0.251477	0.347239
TRCN0000001748	CDS	chr15	40509629:40569688	+	PAK6	NM_020168	0.551379	0.806609	0.280197	0.347377	-1.52543	0.989977	-0.0145331	0.655943	0.736008
TRCN0000007111	CDS	chr20	9518037:9819687	-	PAK7	NM_020341	1014.71	900.479	1136.09	1.26165	0.335311	1.25152	0.323678	0.000787828	0.012969
TRCN0000007109	CDS	chr20	9518037:9819687	-	PAK7	NM_020341	1905.77	1811.79	2005.61	1.10697	0.146621	1.11138	0.152356	0.0450967	0.0958027
TRCN0000007108	CDS	chr20	9518037:9819687	-	PAK7	NM_020341	1059.28	1008.44	1113.3	1.10398	0.142718	1.10772	0.147592	0.0921211	0.15979
TRCN0000007110	CDS	chr20	9518037:9819687	-	PAK7	NM_020341	1315.09	1368.3	1258.56	0.919801	-0.120607	0.927847	-0.108041	0.0870429	0.153551
TRCN0000007107	3UTR	chr20	9518037:9819687	-	PAK7	NM_020341	2962.31	2992.57	2930.16	0.979147	-0.0304028	0.983381	-0.024177	0.71015	0.783093
TRCN0000037559	3UTR	chr10	91339254:91405329	-	PANK1	NM_138316	781.591	656.118	914.906	1.39442	0.479668	1.35154	0.43461	0.00346563	0.0217353
TRCN0000037560	CDS	chr10	91339254:91405329	-	PANK1	NM_138316	3092.25	2912.84	3282.88	1.12704	0.172535	1.13358	0.180892	0.00598175	0.0280517
TRCN0000037562	CDS	chr10	91339254:91405329	-	PANK1	NM_138316	6221.55	6441.14	5988.23	0.929685	-0.105187	0.925205	-0.112155	0.0362767	0.0818064
TRCN0000037561	CDS	chr10	91339254:91405329	-	PANK1	NM_138316	5806.9	5994.54	5607.53	0.93544	-0.0962837	0.943158	-0.0844284	0.152968	0.236057
TRCN0000037737	CDS	chr20	3869486:3904502	+	PANK2	NM_024960	612.863	559.017	670.074	1.19866	0.261428	1.19108	0.252266	0.0275609	0.0681529
TRCN0000037736	CDS	chr20	3869486:3904502	+	PANK2	NM_024960	1355.25	1285.49	1429.37	1.11193	0.153063	1.11379	0.155475	0.0322627	0.0754721
TRCN0000037735	CDS	chr20	3869486:3904502	+	PANK2	NM_024960	700.526	678.671	723.747	1.06642	0.0927748	1.08924	0.123318	0.191973	0.280676
TRCN0000037738	CDS	chr20	3869486:3904502	+	PANK2	NM_024960	753.135	741.116	765.904	1.03345	0.0474635	1.01489	0.0213267	0.73945	0.805065
TRCN0000037704	CDS	chr5	167982628:168006614	-	PANK3	NM_024594	4019.63	3690.07	4369.79	1.1842	0.243915	1.18652	0.246732	0.000565649	0.0116432
TRCN0000037706	CDS	chr5	167982628:168006614	-	PANK3	NM_024594	374.532	413.981	332.618	0.803463	-0.315697	0.853632	-0.228313	0.0888578	0.155623
TRCN0000037708	CDS	chr5	167982628:168006614	-	PANK3	NM_024594	3370.31	3419.54	3318	0.970305	-0.0434894	0.962289	-0.0554579	0.332344	0.429503
TRCN0000037707	CDS	chr5	167982628:168006614	-	PANK3	NM_024594	486.643	496.07	476.626	0.960804	-0.0576864	0.985862	-0.020542	0.866018	0.906109
TRCN0000037691	CDS	chr1	2439975:2458035	-	PANK4	NM_018216	1344.69	1286.16	1406.88	1.09386	0.129426	1.12913	0.175209	0.0336714	0.0778587
TRCN0000037690	CDS	chr1	2439975:2458035	-	PANK4	NM_018216	338.126	305.026	373.295	1.22381	0.291381	1.22374	0.291291	0.0345715	0.0792088
TRCN0000037689	CDS	chr1	2439975:2458035	-	PANK4	NM_018216	771.145	709.448	836.697	1.17936	0.238007	1.16932	0.225668	0.0624839	0.120789
TRCN0000037693	CDS	chr1	2439975:2458035	-	PANK4	NM_018216	944.23	1046.89	835.153	0.797745	-0.326	0.827231	-0.273638	0.0010252	0.0132573
TRCN0000010179	CDS	chr4	108534822:108641419	-	PAPSS1	NM_005443	4487.64	4195.79	4797.74	1.14347	0.193412	1.15497	0.207854	0.000399936	0.0105579
TRCN0000010180	CDS	chr4	108534822:108641419	-	PAPSS1	NM_005443	1396.67	1310.95	1487.76	1.13488	0.182534	1.13171	0.178508	0.0824938	0.147936
TRCN0000010173	CDS	chr4	108534822:108641419	-	PAPSS1	NM_005443	5753.19	5680.38	5830.55	1.02644	0.0376449	1.03234	0.0459141	0.350411	0.447657
TRCN0000010172	CDS	chr4	108534822:108641419	-	PAPSS1	NM_005443	3676.72	3848.2	3494.53	0.908096	-0.139084	0.904887	-0.14419	0.0165336	0.0491824
TRCN0000007053	CDS	chr2	242045514:242089394	-	PASK	NM_015148	11119.6	10691.2	11574.8	1.08265	0.114571	1.09138	0.126153	0.0506042	0.103752
TRCN0000007055	CDS	chr2	242045514:242089394	-	PASK	NM_015148	1850.14	1785.29	1919.04	1.07492	0.104228	1.0898	0.124058	0.0950542	0.163932
TRCN0000007052	3UTR	chr2	242045514:242089394	-	PASK	NM_015148	12238.6	13452.4	10949	0.8139	-0.297076	0.817478	-0.290748	0.000106694	0.00730241
TRCN0000007054	CDS	chr2	242045514:242089394	-	PASK	NM_015148	7579.18	7941.72	7193.99	0.905847	-0.14266	0.910784	-0.13482	0.0369895	0.0831642
TRCN0000001809	3UTR	chr8	27667138:27695612	-	PBK	NM_018492	3422.39	3251.25	3604.23	1.10857	0.148694	1.11266	0.154013	0.045453	0.0960166
TRCN0000001807	CDS	chr8	27667138:27695612	-	PBK	NM_018492	1794.36	1866.23	1717.99	0.920566	-0.119407	0.922617	-0.116197	0.200001	0.289457
TRCN0000001808	CDS	chr8	27667138:27695612	-	PBK	NM_018492	2968.81	3010.47	2924.55	0.971458	-0.0417771	0.976177	-0.0347848	0.557193	0.648944
TRCN0000001806	CDS	chr8	27667138:27695612	-	PBK	NM_018492	6139.05	6166.99	6109.35	0.990653	-0.0135478	0.985757	-0.0206962	0.620844	0.704248
TRCN0000052653	CDS	chr20	56136137:56141513	+	PCK1	NM_002591	388.918	349.074	431.252	1.23542	0.305001	1.22809	0.296415	0.0146786	0.0458669
TRCN0000052654	CDS	chr20	56136137:56141513	+	PCK1	NM_002591	378.92	343.063	417.019	1.21558	0.28164	1.233	0.302171	0.0227956	0.0602669
TRCN0000052657	CDS	chr20	56136137:56141513	+	PCK1	NM_002591	924.407	1015.61	827.507	0.814791	-0.295499	0.830339	-0.268227	0.0114952	0.0399475
TRCN0000052655	CDS	chr20	56136137:56141513	+	PCK1	NM_002591	963.709	1042.74	879.74	0.843682	-0.245229	0.876158	-0.190737	0.105576	0.177396
TRCN0000052656	CDS	chr20	56136137:56141513	+	PCK1	NM_002591	916.339	920.227	912.209	0.991288	-0.0126244	0.99801	-0.00287445	0.974064	0.983883
TRCN0000052664	CDS	chr14	24563340:24573341	+	PCK2	NM_004563	404.126	370.181	440.193	1.18913	0.249907	1.17347	0.230779	0.0715798	0.133841
TRCN0000052667	CDS	chr14	24563340:24573341	+	PCK2	NM_004563	1195.26	1151.19	1242.09	1.07896	0.109646	1.08788	0.121521	0.106917	0.179149
TRCN0000052665	CDS	chr14	24563340:24573341	+	PCK2	NM_004563	1737.75	1890.57	1575.38	0.833282	-0.263123	0.846645	-0.240171	0.00467819	0.0249837
TRCN0000052663	CDS	chr14	24563340:24573341	+	PCK2	NM_004563	1882.49	1927.65	1834.51	0.951681	-0.0714501	0.958473	-0.06119	0.379689	0.476355
TRCN0000052666	CDS	chr14	24563340:24573341	+	PCK2	NM_004563	815.519	834.379	795.48	0.953379	-0.0688777	0.95755	-0.0625809	0.500192	0.594534
TRCN0000001422	3UTR	chr4	55095264:55164412	+	PDGFRA	NM_006206	387.234	311.683	467.507	1.49994	0.584906	1.38309	0.467894	0.00162211	0.0161995
TRCN0000001424	CDS	chr4	55095264:55164412	+	PDGFRA	NM_006206	1040.04	940.374	1145.93	1.21859	0.285207	1.28146	0.357792	0.00452663	0.0244731
TRCN0000001426	CDS	chr4	55095264:55164412	+	PDGFRA	NM_006206	2530.27	2637.3	2416.56	0.916301	-0.126106	0.915494	-0.127377	0.0288865	0.0701132
TRCN0000001423	CDS	chr4	55095264:55164412	+	PDGFRA	NM_006206	2225.84	2295.37	2151.96	0.937524	-0.0930727	0.945056	-0.0815277	0.331704	0.428861
TRCN0000001425	CDS	chr4	55095264:55164412	+	PDGFRA	NM_006206	1164.46	1181.39	1146.46	0.970428	-0.0433062	0.966533	-0.0491086	0.46969	0.563403
TRCN0000001999	3UTR	chr5	149493402:149535422	-	PDGFRB	NM_002609	2277.75	2089.62	2477.64	1.18569	0.245727	1.216	0.282147	0.00016797	0.00861412
TRCN0000001998	CDS	chr5	149493402:149535422	-	PDGFRB	NM_002609	1061.68	1152.94	964.709	0.836735	-0.257157	0.844212	-0.244323	0.0250214	0.0640082
TRCN0000002000	CDS	chr5	149493402:149535422	-	PDGFRB	NM_002609	635.059	667.606	600.477	0.899448	-0.152888	0.879137	-0.18584	0.0512784	0.104362
TRCN0000002001	CDS	chr5	149493402:149535422	-	PDGFRB	NM_002609	1304.78	1342.82	1264.36	0.941576	-0.0868498	0.959437	-0.0597393	0.428407	0.524986
TRCN0000002292	CDS	chr1	26437656:26452039	+	PDIK1L	NM_152835	1431.95	1295.74	1576.68	1.21682	0.283112	1.25838	0.331569	0.011493	0.0399475
TRCN0000002295	CDS	chr1	26437656:26452039	+	PDIK1L	NM_152835	997.868	904.419	1097.16	1.21311	0.278708	1.20663	0.270988	0.0309172	0.0731896
TRCN0000002296	3UTR	chr1	26437656:26452039	+	PDIK1L	NM_152835	1064.61	1058.77	1070.82	1.01138	0.0163305	1.01776	0.0254026	0.720178	0.791827
TRCN0000002293	CDS	chr1	26437656:26452039	+	PDIK1L	NM_152835	1360.58	1478.05	1235.76	0.836073	-0.258299	0.862088	-0.214093	0.0276453	0.0681529
TRCN0000002294	CDS	chr1	26437656:26452039	+	PDIK1L	NM_152835	1946.51	2008.02	1881.16	0.936823	-0.0941521	0.944601	-0.0822226	0.293966	0.391521
TRCN0000006263	CDS	chr2	173420101:173490351	+	PDK1	NM_002610	5309.49	5626.29	4972.89	0.883866	-0.178101	0.887578	-0.172054	0.00734655	0.0308863
TRCN0000006261	CDS	chr2	173420101:173490351	+	PDK1	NM_002610	3627.62	3756.01	3491.2	0.929498	-0.105476	0.906403	-0.141776	0.0128377	0.0422213
TRCN0000006262	CDS	chr2	173420101:173490351	+	PDK1	NM_002610	16726.8	17298.3	16119.6	0.931862	-0.101811	0.929687	-0.105182	0.0306448	0.0729922
TRCN0000006260	CDS	chr2	173420101:173490351	+	PDK1	NM_002610	14221.2	14837.2	13566.7	0.914369	-0.129152	0.925636	-0.111483	0.0795951	0.144395
TRCN0000002318	3UTR	chr17	48172101:48188733	+	PDK2	NM_002611	642.783	576.257	713.468	1.23811	0.308135	1.25718	0.330192	0.00168913	0.0163791
TRCN0000002314	CDS	chr17	48172101:48188733	+	PDK2	NM_002611	1076.24	982.62	1175.72	1.19652	0.25884	1.20741	0.271915	0.0184269	0.0525156
TRCN0000002315	CDS	chr17	48172101:48188733	+	PDK2	NM_002611	1349.05	1313.55	1386.77	1.05574	0.0782541	1.03979	0.0562872	0.323025	0.420716
TRCN0000002317	CDS	chr17	48172101:48188733	+	PDK2	NM_002611	1129.38	1118.99	1140.43	1.01916	0.0273792	1.01767	0.02527	0.754077	0.817953
TRCN0000000261	CDS	chrX	24483344:24568583	+	PDK3	NM_005391	2409.63	2166.38	2668.08	1.23159	0.300519	1.23605	0.305735	3.29659e-05	0.00602125
TRCN0000000259	3UTR	chrX	24483344:24568583	+	PDK3	NM_005391	357.298	313.021	404.344	1.29175	0.369325	1.29241	0.370059	0.00285779	0.0201183
TRCN0000000260	CDS	chrX	24483344:24568583	+	PDK3	NM_005391	2152.76	2258.91	2039.97	0.903079	-0.147076	0.902887	-0.147382	0.00495339	0.0252363
TRCN0000006265	CDS	chr7	95212809:95225925	-	PDK4	NM_002612	3487.72	3233.67	3757.64	1.16204	0.216654	1.20692	0.271334	0.000736336	0.0127328
TRCN0000006267	CDS	chr7	95212809:95225925	-	PDK4	NM_002612	1631.06	1484.65	1786.63	1.20341	0.267124	1.24729	0.318799	0.000762476	0.0127914
TRCN0000006264	3UTR	chr7	95212809:95225925	-	PDK4	NM_002612	600.536	555.888	647.974	1.16566	0.221142	1.17906	0.237635	0.0360713	0.0815265
TRCN0000006266	CDS	chr7	95212809:95225925	-	PDK4	NM_002612	6535.6	6391.16	6689.07	1.04661	0.0657284	1.05338	0.0750197	0.099662	0.169352
TRCN0000006268	CDS	chr7	95212809:95225925	-	PDK4	NM_002612	10923.6	11012.7	10828.8	0.983299	-0.024298	0.982533	-0.0254228	0.58156	0.669028
TRCN0000039778	CDS	chr16	2587965:2653191	+	PDPK1	NM_002613	1957.31	1852.87	2068.28	1.11626	0.15867	1.15482	0.20767	0.0259496	0.06544
TRCN0000039781	CDS	chr16	2587965:2653191	+	PDPK1	NM_002613	2186.26	2168.91	2204.7	1.0165	0.0236108	1.02281	0.032543	0.623383	0.706862
TRCN0000039779	CDS	chr16	2587965:2653191	+	PDPK1	NM_002613	9922.83	10494.5	9315.48	0.887656	-0.171927	0.880751	-0.183195	7.28734e-06	0.00547644
TRCN0000039782	CDS	chr16	2587965:2653191	+	PDPK1	NM_002613	3083.82	3308.4	2845.21	0.859997	-0.217597	0.855687	-0.224845	0.000409232	0.0106061
TRCN0000010146	CDS	chr21	45138978:45182188	+	PDXK	NM_003681	8498.83	8397.92	8606.04	1.02478	0.0353187	1.02802	0.0398742	0.371817	0.468629
TRCN0000010145	CDS	chr21	45138978:45182188	+	PDXK	NM_003681	4265.33	4635.03	3872.52	0.835489	-0.259307	0.82828	-0.27181	0.0018336	0.0168197
TRCN0000010144	CDS	chr21	45138978:45182188	+	PDXK	NM_003681	8547.27	9123.31	7935.23	0.869774	-0.201287	0.88451	-0.17705	0.0143012	0.0448833
TRCN0000010147	CDS	chr21	45138978:45182188	+	PDXK	NM_003681	7094.83	7128.81	7058.72	0.990169	-0.0142535	0.989777	-0.014824	0.777378	0.836363
TRCN0000010148	CDS	chr21	45138978:45182188	+	PDXK	NM_003681	5016.56	5039.62	4992.06	0.990561	-0.0136823	1.00068	0.000985486	0.981827	0.987741
TRCN0000037441	CDS	chr15	77400498:77712446	-	PEAK1	XM_370878	964.578	860.426	1075.24	1.24966	0.321536	1.28351	0.36009	0.001074	0.0134366
TRCN0000037443	CDS	chr15	77400498:77712446	-	PEAK1	XM_370878	10376.2	11272.1	9424.38	0.836079	-0.258288	0.856138	-0.224084	0.0153777	0.0472168
TRCN0000037442	CDS	chr15	77400498:77712446	-	PEAK1	XM_370878	5033.27	5191	4865.69	0.937331	-0.0933697	0.927882	-0.107987	0.111708	0.185113
TRCN0000037440	CDS	chr15	77400498:77712446	-	PEAK1	XM_370878	11255	11719.8	10761.2	0.918205	-0.123111	0.932816	-0.100336	0.121828	0.19835
TRCN0000037439	CDS	chr15	77400498:77712446	-	PEAK1	XM_370878	2547.1	2601.17	2489.65	0.957126	-0.0632186	0.97134	-0.0419518	0.472274	0.566277
TRCN0000037590	CDS	chrX	54959567:55024967	-	PFKFB1	NM_002625	7462.8	6897.89	8063.01	1.16891	0.225162	1.16992	0.226414	0.00027651	0.00980918
TRCN0000037591	CDS	chrX	54959567:55024967	-	PFKFB1	NM_002625	14751.4	15445.6	14013.9	0.907305	-0.140341	0.903234	-0.146829	0.001588	0.0159836
TRCN0000037592	CDS	chrX	54959567:55024967	-	PFKFB1	NM_002625	6235.11	6819.34	5614.37	0.8233	-0.28051	0.844216	-0.244316	0.00680808	0.0299983
TRCN0000037589	CDS	chrX	54959567:55024967	-	PFKFB1	NM_002625	15064.6	16065.4	14001.2	0.871514	-0.198405	0.889261	-0.169321	0.0221242	0.0588542
TRCN0000037593	CDS	chrX	54959567:55024967	-	PFKFB1	NM_002625	12092.8	12390.7	11776.3	0.950413	-0.0733741	0.948563	-0.0761846	0.075122	0.138587
TRCN0000037963	CDS	chr1	207226620:207254368	+	PFKFB2	NM_006212	2939.17	2712.76	3179.72	1.17213	0.229138	1.22098	0.288035	0.00390059	0.0228027
TRCN0000037962	CDS	chr1	207226620:207254368	+	PFKFB2	NM_006212	5121.75	5493.57	4726.7	0.860407	-0.216909	0.868749	-0.202989	0.0281652	0.068777
TRCN0000037961	CDS	chr1	207226620:207254368	+	PFKFB2	NM_006212	4149.79	4229.97	4064.59	0.960901	-0.0575401	0.965662	-0.0504103	0.555589	0.647576
TRCN0000037960	CDS	chr1	207226620:207254368	+	PFKFB2	NM_006212	3984.73	3991.43	3977.61	0.996539	-0.00500185	0.995602	-0.00635921	0.877711	0.914523
TRCN0000037959	CDS	chr1	207226620:207254368	+	PFKFB2	NM_006212	9304.8	9340.09	9267.3	0.992207	-0.0112876	1.00115	0.00165709	0.9703	0.981401
TRCN0000007339	CDS	chr10	6186843:6277507	+	PFKFB3	NM_004566	1147.99	1138.82	1157.74	1.01661	0.0237599	1.03055	0.0434182	0.568675	0.658743
TRCN0000007340	CDS	chr10	6186843:6277507	+	PFKFB3	NM_004566	853.996	845.603	862.915	1.02047	0.0292381	1.02107	0.0300833	0.711021	0.783478
TRCN0000007338	3UTR	chr10	6186843:6277507	+	PFKFB3	NM_004566	861.719	890.753	830.87	0.932772	-0.100404	0.935194	-0.0966618	0.283961	0.381576
TRCN0000007342	CDS	chr10	6186843:6277507	+	PFKFB3	NM_004566	1081.37	1117.02	1043.49	0.934173	-0.0982386	0.937052	-0.0937991	0.285918	0.383521
TRCN0000007341	CDS	chr10	6186843:6277507	+	PFKFB3	NM_004566	2072.63	2117.51	2024.95	0.956288	-0.0644827	0.955692	-0.0653821	0.399198	0.496891
TRCN0000037767	CDS	chr3	48555117:48594227	-	PFKFB4	NM_004567	4374.71	4307.01	4446.64	1.03242	0.0460318	1.04943	0.0696119	0.265309	0.363666
TRCN0000037768	CDS	chr3	48555117:48594227	-	PFKFB4	NM_004567	2998.61	3223.33	2759.85	0.856211	-0.223962	0.856696	-0.223145	0.0123815	0.0415852
TRCN0000037765	CDS	chr3	48555117:48594227	-	PFKFB4	NM_004567	5403.02	5609.59	5183.55	0.924052	-0.113955	0.925802	-0.111224	0.0582148	0.114675
TRCN0000037766	CDS	chr3	48555117:48594227	-	PFKFB4	NM_004567	3061.89	3249.06	2863.03	0.881187	-0.18248	0.891857	-0.165116	0.087851	0.154614
TRCN0000037764	CDS	chr3	48555117:48594227	-	PFKFB4	NM_004567	1063.01	1098.79	1025	0.932838	-0.100302	0.950438	-0.0733357	0.463408	0.558094
TRCN0000010111	CDS	chr21	45719917:45747264	+	PFKL	NM_002626	1636.08	1412.19	1873.96	1.32698	0.408149	1.33482	0.416648	0.000980184	0.0132573
TRCN0000010103	CDS	chr21	45719917:45747264	+	PFKL	NM_002626	4683.64	4648.92	4720.53	1.0154	0.0220544	1.02414	0.034413	0.573119	0.662004
TRCN0000037773	CDS	chr12	48499656:48540187	+	PFKM	NM_000289	3010.21	2962.18	3061.24	1.03344	0.0474567	1.04761	0.0671008	0.252939	0.348938
TRCN0000037772	CDS	chr12	48499656:48540187	+	PFKM	NM_000289	2884.32	2977.84	2784.95	0.935224	-0.0966158	0.933915	-0.0986361	0.106705	0.179067
TRCN0000037770	CDS	chr12	48499656:48540187	+	PFKM	NM_000289	2436.62	2479.12	2391.47	0.964647	-0.0519269	0.958577	-0.0610341	0.393567	0.490897
TRCN0000037771	CDS	chr12	48499656:48540187	+	PFKM	NM_000289	3066.19	3111.54	3018.02	0.969943	-0.0440277	0.965953	-0.0499758	0.409685	0.506587
TRCN0000037769	CDS	chr12	48499656:48540187	+	PFKM	NM_000289	2616.02	2624.51	2607	0.993327	-0.00965881	0.991151	-0.0128238	0.847259	0.890822
TRCN0000037776	CDS	chr10	3109712:3178997	+	PFKP	NM_002627	800.79	717.08	889.733	1.24077	0.311237	1.25212	0.324371	0.00962256	0.0359207
TRCN0000037777	CDS	chr10	3109712:3178997	+	PFKP	NM_002627	1661.16	1641.61	1681.92	1.02455	0.0349949	1.04231	0.0597803	0.388929	0.485608
TRCN0000037774	CDS	chr10	3109712:3178997	+	PFKP	NM_002627	3046.72	3023.79	3071.09	1.01564	0.0223949	1.02003	0.0286056	0.506559	0.600677
TRCN0000037775	CDS	chr10	3109712:3178997	+	PFKP	NM_002627	1265.91	1258.8	1273.47	1.01165	0.0167116	1.01611	0.0230553	0.794853	0.850294
TRCN0000006179	CDS	chrX	77359666:77382324	+	PGK1	NM_000291	1408.88	1245.08	1582.91	1.27133	0.346342	1.28739	0.364445	0.000333556	0.010128
TRCN0000006178	3UTR	chrX	77359666:77382324	+	PGK1	NM_000291	1124.54	1035.09	1219.58	1.17823	0.236623	1.19576	0.257928	0.0459538	0.0968703
TRCN0000006182	CDS	chrX	77359666:77382324	+	PGK1	NM_000291	1144.26	1284.55	995.203	0.774746	-0.368204	0.794248	-0.332339	0.00406798	0.0230289
TRCN0000006181	CDS	chrX	77359666:77382324	+	PGK1	NM_000291	4801.33	5224.26	4351.97	0.833029	-0.263561	0.852309	-0.230551	0.011417	0.0398602
TRCN0000006180	CDS	chrX	77359666:77382324	+	PGK1	NM_000291	3620.36	3767.78	3463.73	0.919303	-0.121388	0.91236	-0.132326	0.0457899	0.0965926
TRCN0000037786	CDS	chr6	49753364:49755053	-	PGK2	NM_138733	1038.61	936.997	1146.58	1.22368	0.291227	1.26036	0.333838	0.00424866	0.0236435
TRCN0000037785	CDS	chr6	49753364:49755053	-	PGK2	NM_138733	4647.31	4444.32	4862.99	1.0942	0.129882	1.11054	0.151267	0.0171323	0.0501947
TRCN0000037788	CDS	chr6	49753364:49755053	-	PGK2	NM_138733	1551.8	1471.01	1637.64	1.11328	0.154814	1.12875	0.17472	0.029631	0.0714855
TRCN0000037787	CDS	chr6	49753364:49755053	-	PGK2	NM_138733	415.906	387.164	446.445	1.15312	0.205537	1.14165	0.19112	0.0709434	0.133039
TRCN0000037784	CDS	chr6	49753364:49755053	-	PGK2	NM_138733	910.762	889.152	933.723	1.05013	0.0705644	1.05196	0.0730824	0.315277	0.414759
TRCN0000006191	CDS	chrX	71798664:71934029	-	PHKA1	NM_002637	992.263	924.994	1063.74	1.14999	0.201624	1.15402	0.206673	0.020309	0.0558543
TRCN0000006188	CDS	chrX	71798664:71934029	-	PHKA1	NM_002637	326.941	298.157	357.523	1.19911	0.261962	1.19188	0.253238	0.0613433	0.118737
TRCN0000006190	CDS	chrX	71798664:71934029	-	PHKA1	NM_002637	282.543	251.432	315.599	1.25521	0.327923	1.21413	0.279919	0.0626495	0.120876
TRCN0000006189	CDS	chrX	71798664:71934029	-	PHKA1	NM_002637	700.029	696.227	704.069	1.01126	0.0161592	1.01687	0.0241353	0.73737	0.803128
TRCN0000006187	3UTR	chrX	71798664:71934029	-	PHKA1	NM_002637	150.851	153.415	148.127	0.965536	-0.0505983	0.985113	-0.0216392	0.888832	0.923231
TRCN0000006195	CDS	chrX	18910416:19002480	-	PHKA2	NM_000292	954.063	947.454	961.085	1.01439	0.0206079	1.01759	0.0251589	0.797411	0.851331
TRCN0000006194	CDS	chrX	18910416:19002480	-	PHKA2	NM_000292	3442.23	3802.98	3058.93	0.804349	-0.314106	0.822245	-0.28236	0.000917574	0.0132161
TRCN0000006192	3UTR	chrX	18910416:19002480	-	PHKA2	NM_000292	3011.41	3081.42	2937.02	0.953138	-0.0692433	0.959235	-0.0600436	0.267272	0.365357
TRCN0000006193	CDS	chrX	18910416:19002480	-	PHKA2	NM_000292	768.327	791.158	744.069	0.94048	-0.0885304	0.95427	-0.0675311	0.552117	0.64503
TRCN0000006200	CDS	chr16	47495210:47735434	+	PHKB	NM_000293	948.774	857.875	1045.35	1.21854	0.285152	1.18271	0.242097	0.00373958	0.0222598
TRCN0000006197	CDS	chr16	47495210:47735434	+	PHKB	NM_000293	114.043	106.391	122.174	1.14835	0.199556	1.14846	0.199706	0.168814	0.254893
TRCN0000006199	CDS	chr16	47495210:47735434	+	PHKB	NM_000293	685.64	796.611	567.733	0.712686	-0.488662	0.767438	-0.381878	0.00244779	0.0189154
TRCN0000006198	CDS	chr16	47495210:47735434	+	PHKB	NM_000293	1060.65	1205.84	906.392	0.751667	-0.411835	0.803416	-0.315781	0.00918633	0.0348223
TRCN0000006196	3UTR	chr16	47495210:47735434	+	PHKB	NM_000293	2187.38	2290.4	2077.92	0.907231	-0.140458	0.924486	-0.113277	0.197196	0.285948
TRCN0000006201	3UTR	chr7	56147976:56160689	-	PHKG1	NM_006213	1107.93	971.222	1253.19	1.29032	0.367733	1.28919	0.366468	0.00913157	0.0347462
TRCN0000006205	CDS	chr7	56147976:56160689	-	PHKG1	NM_006213	1450.75	1368.6	1538.04	1.1238	0.168385	1.1365	0.184595	0.129042	0.207101
TRCN0000006203	CDS	chr7	56147976:56160689	-	PHKG1	NM_006213	6261.06	6707.74	5786.46	0.862653	-0.213147	0.869992	-0.200926	0.00148347	0.0157265
TRCN0000006202	CDS	chr7	56147976:56160689	-	PHKG1	NM_006213	2432.62	2494.56	2366.81	0.948785	-0.0758472	0.955528	-0.0656298	0.318035	0.416927
TRCN0000006204	CDS	chr7	56147976:56160689	-	PHKG1	NM_006213	3423.77	3431.97	3415.06	0.995074	-0.00712427	0.993559	-0.00932234	0.871544	0.909674
TRCN0000000401	CDS	chr16	30759620:30772497	+	PHKG2	NM_000294	1222.54	1151.44	1298.07	1.12734	0.172928	1.14628	0.196958	0.0318731	0.0748014
TRCN0000000400	CDS	chr16	30759620:30772497	+	PHKG2	NM_000294	276.924	272.861	281.241	1.03071	0.0436372	1.02962	0.0421079	0.724823	0.796352
TRCN0000000399	CDS	chr16	30759620:30772497	+	PHKG2	NM_000294	1866.21	1971.2	1754.65	0.890145	-0.167887	0.893401	-0.16262	0.0436217	0.0937961
TRCN0000000398	3UTR	chr16	30759620:30772497	+	PHKG2	NM_000294	1165.37	1213.83	1113.88	0.917655	-0.123977	0.930066	-0.104594	0.340191	0.437388
[truncated: 1,008 more rows]

## Sheet: Up adjp 0.05
TRCN	Chr	Genomic Loc	Strand	Gene	RefSeq	shRNA Loc	baseMean	baseMeanD21	baseMeanT21	foldChange	log2FoldChange	foldChange_adj	log2FoldChange_adj	pval	padj
TRCN0000001942	chr2	69685127:69870977	-	AAK1	NM_014911	CDS	675.765	582.362	775.006	1.3308	0.412292	1.30895	0.388413	0.00149231	0.0157265
TRCN0000001944	chr2	69685127:69870977	-	AAK1	NM_014911	3UTR	914.018	820.376	1013.51	1.23542	0.305006	1.25318	0.325598	0.00656954	0.0295539
TRCN0000021434	chr17	79091096:79139872	-	AATK	XM_375495	3UTR	1186.38	1115.73	1261.44	1.1306	0.177083	1.13983	0.188817	0.0106442	0.0380457
TRCN0000039900	chr9	133589268:133763062	+	ABL1	NM_005157	CDS	233.905	198.997	270.995	1.3618	0.44552	1.27302	0.348258	0.0148591	0.0461908
TRCN0000000443	chr2	158592958:158732374	-	ACVR1	NM_001105	CDS	234.563	199.691	271.615	1.36018	0.443797	1.31666	0.396887	0.00404663	0.0230288
TRCN0000000445	chr2	158592958:158732374	-	ACVR1	NM_001105	CDS	1728.98	1482.4	1990.97	1.34307	0.425537	1.29776	0.376021	0.0093408	0.0352358
TRCN0000001813	chr12	52345451:52390863	+	ACVR1B	NM_020328	CDS	3245.33	3049.53	3453.37	1.13243	0.179419	1.16357	0.218558	0.000594887	0.0116878
TRCN0000001828	chr2	158383279:158485399	-	ACVR1C	NM_145259	CDS	603.399	523.904	687.862	1.31296	0.392818	1.29811	0.376412	0.00509061	0.0256304
TRCN0000000447	chr3	38495790:38534633	+	ACVR2B	NM_001106	CDS	327.994	289.14	369.276	1.27715	0.352932	1.29559	0.373608	0.00512437	0.0256304
TRCN0000021502	chr14	78266426:78400297	+	ADCK1	NM_020421	CDS	3384.3	3090.86	3696.09	1.19581	0.257991	1.22226	0.289548	0.000926016	0.0132161
TRCN0000021394	chr7	140372953:140394908	+	ADCK2	NM_052853	3UTR	1321.46	1226.39	1422.48	1.1599	0.213999	1.1842	0.24391	0.00158874	0.0159836
TRCN0000021396	chr7	140372953:140394908	+	ADCK2	NM_052853	CDS	1105.98	1005.49	1212.75	1.20613	0.270385	1.23304	0.302222	0.00192391	0.0169597
TRCN0000021483	chr8	145597704:145618453	+	ADCK5	NM_174922	CDS	1689.99	1598.07	1787.67	1.11864	0.161748	1.14219	0.191798	0.0163804	0.0489577
TRCN0000052583	chr15	73043708:73076126	-	ADPGK	NM_031284	CDS	361.402	309.709	416.327	1.34425	0.426804	1.33355	0.415276	0.000409284	0.0106061
TRCN0000052586	chr15	73043708:73076126	-	ADPGK	NM_031284	CDS	475.341	414.215	540.287	1.30437	0.383348	1.28124	0.357541	0.00831403	0.0333226
TRCN0000000557	chr11	67033905:67054029	+	ADRBK1	NM_001619	3UTR	880.584	754.266	1014.8	1.34541	0.428044	1.31942	0.399899	0.000745501	0.0127328
TRCN0000002037	chr22	25960861:26125258	+	ADRBK2	NM_005160	CDS	1412.6	1278.13	1555.47	1.21699	0.283318	1.23729	0.307185	0.000762047	0.0127914
TRCN0000002035	chr22	25960861:26125258	+	ADRBK2	NM_005160	CDS	2656.79	2531.97	2789.42	1.10168	0.139708	1.11262	0.153965	0.0120203	0.0409772
TRCN0000006031	chr9	4709557:4742043	-	AK3	NM_016282	CDS	2919.74	2746.81	3103.48	1.12985	0.176134	1.14024	0.189341	0.000498187	0.0113451
TRCN0000006030	chr9	4709557:4742043	-	AK3	NM_016282	CDS	2811.36	2526.76	3113.74	1.2323	0.301356	1.24733	0.31884	0.00328571	0.0212863
TRCN0000078639	NA	NA:NA	NA	AK3L2	XM_370688	CDS	669.067	594.149	748.668	1.26007	0.333501	1.25883	0.332079	0.000244088	0.00977013
TRCN0000006034	chr1	77747662:78025654	+	AK5	NM_012093	CDS	4318.49	3987.93	4669.7	1.17096	0.227688	1.17984	0.238588	0.00213931	0.0179308
TRCN0000006033	chr1	77747662:78025654	+	AK5	NM_012093	CDS	1541.59	1418.39	1672.5	1.17915	0.237751	1.21194	0.277322	0.00626494	0.0287518
TRCN0000039796	chr14	105235687:105262080	-	AKT1	NM_005163	CDS	1537.52	1393.84	1690.18	1.21261	0.278117	1.25825	0.331418	0.00189434	0.0168197
TRCN0000000566	chr19	40736224:40791302	-	AKT2	NM_001626	CDS	1431.32	1309.85	1560.39	1.19127	0.252505	1.20509	0.269139	0.00721436	0.0305873
TRCN0000039890	chr1	243651535:244006886	-	AKT3	NM_005465	CDS	1736.43	1607.71	1873.18	1.16512	0.220482	1.16776	0.22375	0.00422093	0.0235401
TRCN0000000786	chr2	29415640:30144477	-	ALK	NM_004304	CDS	2866.76	2700.07	3043.87	1.12733	0.172908	1.1214	0.1653	0.012465	0.0418189
TRCN0000021475	chr4	113218499:113363764	+	ALPK1	NM_025144	CDS	2901.16	2795.33	3013.61	1.07809	0.108472	1.10215	0.140314	0.0162943	0.0488341
TRCN0000021391	chr18	56148482:56296189	-	ALPK2	NM_052947	CDS	835.606	754.428	921.857	1.22193	0.289159	1.25136	0.323501	0.0102813	0.0373708
TRCN0000021524	chr15	85359911:85416713	+	ALPK3	NM_020778	3UTR	822.644	732.121	918.824	1.25502	0.327708	1.26558	0.339798	0.0117545	0.0405153
TRCN0000001956	chr12	53817639:53825318	+	AMHR2	NM_020547	CDS	3157.45	2855.51	3478.26	1.21809	0.284618	1.23693	0.306762	0.000169073	0.00861412
TRCN0000001959	chr12	53817639:53825318	+	AMHR2	NM_020547	CDS	804.003	730.751	881.834	1.20675	0.271128	1.18224	0.241527	0.00840346	0.0333256
TRCN0000000570	chrX	47420499:47431320	+	ARAF	NM_001654	CDS	1019.72	921	1124.6	1.22107	0.288141	1.24667	0.318081	0.00457602	0.0246515
TRCN0000038654	chr11	108093559:108239826	+	ATM	NM_000051	3UTR	2167.41	1986.46	2359.67	1.18787	0.248382	1.19992	0.262944	0.00151875	0.0157265
TRCN0000039951	chr11	108093559:108239826	+	ATM	NM_000051	CDS	2700.93	2509.43	2904.4	1.15739	0.210879	1.17428	0.231772	0.00234552	0.0186586
TRCN0000039948	chr11	108093559:108239826	+	ATM	NM_000051	3UTR	1567.86	1308.25	1843.69	1.40928	0.494955	1.32544	0.406475	0.00835939	0.0333256
TRCN0000039617	chr3	142168077:142297668	-	ATR	NM_001184	CDS	4053.64	3586.42	4550.07	1.26869	0.343341	1.26074	0.334271	0.000448668	0.0108766
TRCN0000000656	chr20	54944445:54967351	-	AURKA	NM_003600	CDS	3285.51	3151.39	3428.02	1.08778	0.121385	1.11179	0.152889	0.0111831	0.0393339
TRCN0000000776	chr17	8108049:8113944	-	AURKB	NM_004217	3UTR	2601.71	2291.06	2931.77	1.27965	0.355754	1.32037	0.400938	0.00623986	0.0286805
TRCN0000000572	chr19	41725104:41767672	+	AXL	NM_001699	3UTR	1156.41	976.94	1347.11	1.37891	0.463523	1.31595	0.396105	0.0083812	0.0333256
TRCN0000010183	chr16	31119615:31124112	+	BCKDK	NM_005881	CDS	1654.86	1511.33	1807.37	1.19588	0.25807	1.21281	0.278358	0.0118127	0.0405815
TRCN0000000913	chr4	79697532:79833341	+	BMP2K	NM_017593	3UTR	1346.05	1255.33	1442.44	1.14905	0.200439	1.20083	0.264035	0.000882148	0.0131476
TRCN0000000917	chr4	79697532:79833341	+	BMP2K	NM_017593	CDS	511.166	423.611	604.194	1.42629	0.512269	1.37805	0.462631	0.00238565	0.0186586
TRCN0000000915	chr4	79697532:79833341	+	BMP2K	NM_017593	CDS	534.372	494.825	576.391	1.16484	0.220128	1.18349	0.243049	0.0161436	0.0484792
TRCN0000000456	chr2	203241050:203432474	+	BMPR2	NM_001204	3UTR	1269.88	1159.11	1387.56	1.19709	0.259537	1.23475	0.304222	0.00317004	0.0211748
TRCN0000006291	chr7	140433813:140624564	-	BRAF	NM_004333	CDS	2870.06	2715.3	3034.49	1.11755	0.160339	1.12546	0.170519	0.0118306	0.0405969
TRCN0000006312	chr6	32936437:32949282	+	BRD2	NM_005104	CDS	1754.77	1603.79	1915.2	1.19417	0.256014	1.20093	0.264153	0.00035322	0.0104096
TRCN0000006309	chr6	32936437:32949282	+	BRD2	NM_005104	CDS	1505.06	1355.79	1663.66	1.22708	0.29523	1.28218	0.358597	0.00263243	0.0192503
TRCN0000006308	chr6	32936437:32949282	+	BRD2	NM_005104	3UTR	1423.58	1203.48	1657.44	1.37721	0.461753	1.30261	0.381407	0.00903908	0.0345693
TRCN0000021378	chr9	136895446:136933141	-	BRD3	NM_007371	CDS	797.751	693.732	908.272	1.30925	0.388746	1.29828	0.376603	0.000561415	0.0116387
TRCN0000021375	chr9	136895446:136933141	-	BRD3	NM_007371	CDS	1467.65	1394.96	1544.88	1.10748	0.147276	1.12557	0.170661	0.00492014	0.0252363
TRCN0000006303	chr1	92414928:92479985	+	BRDT	NM_001726	3UTR	968.25	781.384	1166.8	1.49324	0.578449	1.33697	0.418972	0.00712723	0.0305454
TRCN0000006306	chr1	92414928:92479985	+	BRDT	NM_001726	CDS	4829.39	4426.91	5257.01	1.18751	0.247941	1.21631	0.282512	0.00961156	0.0359207
TRCN0000002400	chr19	55795534:55823903	+	BRSK1	NM_032430	CDS	994.218	845.604	1152.12	1.36248	0.446237	1.37	0.454178	0.000264775	0.00977013
TRCN0000000735	chr11	1411129:1483919	+	BRSK2	NM_003957	3UTR	696.212	603.956	794.234	1.31505	0.39512	1.28341	0.359985	0.0121904	0.0412197
TRCN0000000462	chr15	40453210:40513337	+	BUB1B	NM_001211	CDS	1639.61	1384.63	1910.52	1.3798	0.46446	1.31306	0.392932	0.00708042	0.0305454
TRCN0000000463	chr15	40453210:40513337	+	BUB1B	NM_001211	CDS	143.507	121.918	166.446	1.36523	0.44914	1.29067	0.368122	0.0155631	0.0474935
TRCN0000037572	chr14	90863327:90874619	+	CALM1	NM_006888	CDS	730.059	633.527	832.624	1.31427	0.394259	1.31838	0.398767	0.00183675	0.0168197
TRCN0000037899	chr19	47104512:47114039	+	CALM3	NM_005184	CDS	825.002	760.198	893.856	1.17582	0.233668	1.22989	0.298533	0.00710131	0.0305454
TRCN0000000676	chr3	9799029:9811668	-	CAMK1	NM_003656	3UTR	2419.37	2155.81	2699.41	1.25215	0.324413	1.26911	0.343817	0.000707008	0.0124446
TRCN0000001455	chr1	209757045:209787284	+	CAMK1G	NM_020439	CDS	730.333	555.516	916.075	1.64905	0.721638	1.50071	0.585643	0.000103478	0.00730241
TRCN0000001984	chr17	3763617:3796337	-	CAMKK1	NM_172207	CDS	507.05	450.427	567.211	1.25928	0.332594	1.26636	0.340692	0.0016593	0.0162241
TRCN0000001983	chr17	3763617:3796337	-	CAMKK1	NM_172207	CDS	1659.69	1574.93	1749.76	1.11101	0.151872	1.12672	0.172134	0.0123091	0.0414346
TRCN0000002301	chr12	121675495:121736111	-	CAMKK2	NM_153499	3UTR	481.427	400.54	567.37	1.41651	0.502345	1.38421	0.46906	0.000258583	0.00977013
TRCN0000000661	chr1	227177566:227505826	-	CDC42BPA	NM_003607	CDS	6124.7	5874.6	6390.44	1.08781	0.121426	1.08577	0.118725	0.00354637	0.0218451
TRCN0000000853	chr14	103398716:103523742	-	CDC42BPB	NM_006035	3UTR	3429.3	3198.64	3674.37	1.14873	0.200039	1.19022	0.25123	0.0125862	0.0418982
TRCN0000021469	chr11	64591662:64612041	-	CDC42BPG	XM_290516	3UTR	634.971	575.115	698.567	1.21465	0.280546	1.23845	0.308533	0.00365407	0.0221008
TRCN0000003172	chr1	91966404:91991321	+	CDC7	NM_003503	CDS	787.485	674.427	907.609	1.34575	0.428408	1.32977	0.41118	0.000511482	0.0114566
TRCN0000000583	chr10	62538089:62554610	+	CDK1	NM_001786	CDS	1339.87	1243.9	1441.85	1.15913	0.213044	1.19859	0.26134	0.0044442	0.0242467
TRCN0000000582	chr10	62538089:62554610	+	CDK1	NM_001786	3UTR	907.434	816.181	1004.39	1.2306	0.29936	1.2527	0.325038	0.00609325	0.0283598
TRCN0000000584	chr10	62538089:62554610	+	CDK1	NM_001786	CDS	911.636	820.052	1008.94	1.23034	0.299059	1.25164	0.323824	0.016028	0.0482766
TRCN0000000702	chr7	39989959:40136733	+	CDK13	NM_003718	CDS	1250.24	1123.38	1385.02	1.2329	0.302061	1.24661	0.318007	0.00208909	0.0177549
TRCN0000002366	chr7	90225676:90839905	+	CDK14	NM_012395	CDS	886.684	769.169	1011.54	1.31511	0.395188	1.31691	0.397162	0.00695579	0.0302642
TRCN0000002369	chr7	90225676:90839905	+	CDK14	NM_012395	CDS	1737.88	1605.57	1878.46	1.16996	0.22646	1.15676	0.210089	0.00784598	0.03222
TRCN0000006244	chr12	96672039:96794366	-	CDK17	NM_002595	CDS	995.297	894.418	1102.48	1.23262	0.301732	1.2295	0.298076	0.00445248	0.0242467
TRCN0000006245	chr12	96672039:96794366	-	CDK17	NM_002595	CDS	1603.8	1471.4	1744.48	1.18559	0.245601	1.20914	0.273983	0.0101023	0.0370658
TRCN0000003140	chr6	110931181:111136412	-	CDK19	NM_015076	CDS	2802.71	2559.75	3060.87	1.19577	0.257937	1.21786	0.284346	0.000237748	0.00977013
TRCN0000003144	chr6	110931181:111136412	-	CDK19	NM_015076	3UTR	2996.1	2673.84	3338.5	1.24858	0.320288	1.27801	0.353897	0.00282949	0.0200128
TRCN0000039960	chr12	56360553:56366573	+	CDK2	NM_052827	CDS	2019.78	1938.61	2106.01	1.08635	0.119487	1.10287	0.141257	0.0124942	0.04182
TRCN0000000587	chr12	56360553:56366573	+	CDK2	NM_001798	3UTR	319.677	289.725	351.501	1.21322	0.278842	1.19459	0.256515	0.0138669	0.0441099
TRCN0000002216	chr9	90581359:90589695	-	CDK20	NM_178432	CDS	1985.57	1766.29	2218.57	1.25606	0.328908	1.24314	0.313988	0.00536528	0.0264151
TRCN0000000483	chr17	73996987:74002080	+	CDK3	NM_001258	CDS	1009.74	882.872	1144.55	1.29639	0.374499	1.29533	0.373316	0.00915584	0.0347506
TRCN0000000482	chr17	73996987:74002080	+	CDK3	NM_001258	CDS	494.048	425.507	566.873	1.33223	0.413843	1.3001	0.378627	0.0106689	0.0380888
TRCN0000000363	chr12	58141510:58146230	-	CDK4	NM_000075	CDS	792.051	719.716	868.907	1.20729	0.271774	1.23356	0.302824	0.00719798	0.0305609
TRCN0000039746	chr7	92234235:92465941	-	CDK6	NM_001259	CDS	884.384	785.519	989.428	1.25958	0.332948	1.27773	0.353585	0.0087481	0.0340191
TRCN0000000596	chr5	68530622:68573257	+	CDK7	NM_001799	CDS	558.804	481.964	640.446	1.32883	0.410153	1.32577	0.406835	0.00245486	0.0189154
TRCN0000000727	chr4	76501704:76555721	-	CDKL2	NM_003948	CDS	1120.04	1025.61	1220.36	1.18989	0.25083	1.2427	0.313483	0.0053846	0.0264151
TRCN0000021520	chr2	39405688:39456673	-	CDKL4	XM_293029	CDS	1751.24	1517.58	1999.51	1.31756	0.397871	1.32056	0.401147	0.00113715	0.0137279
TRCN0000021519	chr2	39405688:39456673	-	CDKL4	XM_293029	3UTR	601.627	507.434	701.707	1.38285	0.467648	1.33669	0.418666	0.00564084	0.0271302
TRCN0000002527	chr14	54863673:54886934	+	CDKN3	NM_005192	3UTR	1953.86	1739.84	2181.25	1.25371	0.326203	1.25338	0.325829	0.00266856	0.0192503
TRCN0000002524	chr14	54863673:54886934	+	CDKN3	NM_005192	CDS	989.144	889.826	1094.67	1.2302	0.298898	1.2455	0.31672	0.0129317	0.042229
TRCN0000037686	chr22	47080307:47134152	-	CERK	NM_182661	CDS	2127.6	1767.94	2509.75	1.41959	0.505473	1.33514	0.416994	0.0061257	0.0284604
TRCN0000037685	chr22	47080307:47134152	-	CERK	NM_182661	CDS	3445.07	3261.97	3639.61	1.11577	0.158041	1.15646	0.209718	0.0156416	0.0474935
TRCN0000039853	chr11	125495031:125546150	+	CHEK1	NM_001274	CDS	4843.97	4483.98	5226.45	1.16558	0.221052	1.16723	0.22309	0.00271179	0.0194409
TRCN0000039854	chr11	125495031:125546150	+	CHEK1	NM_001274	CDS	1382.27	1243.23	1530	1.23067	0.299439	1.23636	0.306096	0.00315273	0.0211646
TRCN0000006046	chr11	67820326:67888858	-	CHKA	NM_001277	3UTR	550.696	462.543	644.358	1.39308	0.478274	1.38361	0.46844	0.00187186	0.0168197
TRCN0000006053	chr14	103985995:103989196	-	CKB	NM_001823	CDS	1976.71	1841.32	2120.56	1.15165	0.2037	1.15092	0.202783	0.00714353	0.0305454
TRCN0000006056	chr15	43885252:43891604	+	CKMT1B	NM_020990	CDS	1103.25	1002.53	1210.27	1.20721	0.271683	1.2336	0.302872	0.00896675	0.0344681
TRCN0000006060	chr5	80529139:80562217	+	CKMT2	NM_001825	CDS	655.961	560.433	757.459	1.35156	0.434625	1.38193	0.466689	0.0012203	0.014118
TRCN0000006062	chr5	80529139:80562217	+	CKMT2	NM_001825	CDS	1498.5	1371.4	1633.54	1.19115	0.252352	1.20982	0.274796	0.004264	0.0236487
TRCN0000000757	chr2	201717732:201729467	-	CLK1	NM_004071	CDS	4833.6	4520.51	5166.25	1.14284	0.19263	1.13769	0.186103	0.00198689	0.0173118
TRCN0000000748	chr15	74900713:74922542	+	CLK3	NM_003992	CDS	1404.2	1259.05	1558.42	1.23777	0.30774	1.23796	0.307969	0.000665823	0.0120787
TRCN0000001351	chr5	178029665:178054054	-	CLK4	NM_020666	CDS	443.082	362.631	528.561	1.45757	0.543566	1.36412	0.447968	0.0037846	0.0223947
TRCN0000006215	chr5	74666928:74807806	-	COL4A3BP	NM_005713	CDS	488.671	432.01	548.873	1.27051	0.345406	1.26478	0.338887	0.0125221	0.04182
TRCN0000006044	chr5	148875457:148931115	-	CSNK1A1	NM_001892	CDS	1901.58	1747.62	2065.16	1.1817	0.240859	1.19352	0.25522	0.000238011	0.00977013
TRCN0000006043	chr5	148875457:148931115	-	CSNK1A1	NM_001892	CDS	3578	3365.64	3803.63	1.13013	0.176494	1.13109	0.177707	0.00658195	0.0295539
TRCN0000007027	chr13	37677397:37679801	-	CSNK1A1L	NM_145203	CDS	2084.07	1887.93	2292.48	1.21429	0.280107	1.24147	0.312053	0.00323133	0.0212365
TRCN0000009957	chr22	38686697:38794527	-	CSNK1E	NM_001894	CDS	3371.8	3193.69	3561.04	1.11502	0.157072	1.119	0.162215	0.0122545	0.0413434
TRCN0000009955	chr22	38686697:38794527	-	CSNK1E	NM_001894	CDS	2121.82	2037.38	2211.54	1.08548	0.118339	1.09463	0.130438	0.0162381	0.0487143
TRCN0000010608	chr15	64457716:64648442	-	CSNK1G1	NM_022048	CDS	11444	10104.5	12867.1	1.2734	0.348683	1.29523	0.373205	0.000997727	0.0132573
TRCN0000038672	chr19	1941161:1981336	+	CSNK1G2	NM_001319	CDS	876.191	788.656	969.198	1.22892	0.297396	1.20923	0.274086	0.0168957	0.0498414
TRCN0000000985	chr9	90112143:90323549	+	DAPK1	NM_004938	CDS	1015.8	873.789	1166.68	1.3352	0.417053	1.29767	0.375929	0.00300074	0.0206412
TRCN0000000984	chr9	90112143:90323549	+	DAPK1	NM_004938	CDS	1693.16	1602.78	1789.18	1.1163	0.158725	1.158	0.211639	0.00682594	0.0299983
TRCN0000001719	chr15	64199235:64338521	-	DAPK2	NM_014326	CDS	3547.67	3332.58	3776.21	1.13312	0.180298	1.1435	0.193452	0.00351805	0.021765
TRCN0000001718	chr15	64199235:64338521	-	DAPK2	NM_014326	3UTR	2048.75	1742	2374.68	1.36319	0.446983	1.31845	0.398847	0.00538001	0.0264151
TRCN0000009932	chr4	71859265:71896629	+	DCK	NM_000788	CDS	5738.68	5443.03	6052.81	1.11203	0.153196	1.14531	0.195742	0.00304477	0.0208963
TRCN0000002146	chr13	36342789:36705514	-	DCLK1	NM_004734	3UTR	400.63	343.146	461.706	1.34551	0.428152	1.3484	0.431249	0.000789527	0.012969
TRCN0000001974	chr4	150999426:151178608	+	DCLK2	NM_152619	3UTR	1288.34	1175.68	1408.03	1.19763	0.260181	1.19041	0.25146	0.00376806	0.0223592
TRCN0000021555	chr3	36753913:36781352	-	DCLK3	XM_047355	CDS	2357.78	2126.44	2603.58	1.22438	0.292055	1.23672	0.306515	0.00363186	0.0220676
TRCN0000006078	chr12	56324946:56347807	+	DGKA	NM_001345	3UTR	1110.42	998.989	1228.81	1.23005	0.298723	1.26178	0.335458	0.00849672	0.0334308
TRCN0000006084	chr17	54911460:54946036	+	DGKE	NM_003647	CDS	1593.16	1403.65	1794.51	1.27846	0.354406	1.28325	0.359805	0.000497877	0.0113451
TRCN0000052543	chrX	50108406:50213737	-	DGKK	XM_066534	CDS	2843.65	2667.53	3030.77	1.13617	0.18418	1.14081	0.190058	0.00185177	0.0168197
TRCN0000006075	chr2	74153953:74186088	+	DGUOK	NM_001929	CDS	947.015	852.263	1047.69	1.2293	0.297839	1.25733	0.330367	0.00357468	0.0218849
TRCN0000000815	chr19	46272967:46285815	-	DMPK	NM_004409	CDS	1058.11	927.549	1196.83	1.29031	0.367717	1.31465	0.39468	0.00312282	0.0211646
TRCN0000037513	chr1	205111631:205180727	-	DSTYK	NM_015375	CDS	1560.18	1373.54	1758.49	1.28026	0.35644	1.29433	0.372207	0.000813107	0.013109
TRCN0000037511	chr1	205111631:205180727	-	DSTYK	NM_015375	CDS	1885.44	1730.34	2050.23	1.18487	0.244727	1.21965	0.286467	0.00619792	0.0285506
TRCN0000037512	chr1	205111631:205180727	-	DSTYK	NM_015375	CDS	2333.63	2207.22	2467.93	1.11812	0.161071	1.12944	0.17561	0.00842286	0.0333585
TRCN0000006394	chr2	242615157:242626383	-	DTYMK	NM_012145	3UTR	1662.25	1396.44	1944.68	1.3926	0.477784	1.37042	0.454619	0.000529718	0.0114566
TRCN0000000525	chr21	38739859:38887679	+	DYRK1A	NM_001396	CDS	645.499	546.13	751.078	1.37527	0.459718	1.36241	0.446163	0.00104774	0.0134021
TRCN0000000650	chr12	68042512:68056444	+	DYRK2	NM_003583	3UTR	1283.93	1155.66	1420.21	1.22892	0.297388	1.25366	0.326149	0.00076595	0.0127914
TRCN0000000648	chr1	206808881:206822542	+	DYRK3	NM_003582	CDS	2199.67	2080.32	2326.49	1.11834	0.161354	1.12295	0.167292	0.00818612	0.0330746
TRCN0000006221	chr16	22217592:22300066	+	EEF2K	NM_013302	3UTR	966.164	895.565	1041.18	1.16259	0.217344	1.18452	0.2443	0.0141468	0.0446693
TRCN0000010230	chr7	6061878:6098860	-	EIF2AK1	NM_014413	CDS	2919.62	2640.43	3216.26	1.21808	0.28461	1.23439	0.303802	0.00011185	0.00747158
TRCN0000010231	chr7	6061878:6098860	-	EIF2AK1	NM_014413	CDS	2530.24	2266.73	2810.21	1.23977	0.310067	1.25782	0.330931	0.000456219	0.0109711
TRCN0000078650	chr15	40226325:40327797	+	EIF2AK4	XM_496066	CDS	1150.44	1014.77	1294.59	1.27575	0.351347	1.27648	0.352172	0.00025402	0.00977013
TRCN0000006402	chr7	143088205:143105985	-	EPHA1	NM_005232	CDS	2187.74	1859.25	2536.76	1.3644	0.448265	1.37326	0.4576	0.000302813	0.00991009
TRCN0000006408	chr3	89156674:89531284	+	EPHA3	NM_005233	3UTR	3123.26	2821.14	3444.26	1.22087	0.287913	1.25655	0.329473	0.000854024	0.013109
TRCN0000006412	chr3	89156674:89531284	+	EPHA3	NM_005233	CDS	2165.79	2055.17	2283.32	1.11102	0.151879	1.13858	0.18724	0.0156068	0.0474935
TRCN0000006413	chr4	66185281:66536213	-	EPHA5	NM_004439	3UTR	5495	5043.42	5974.81	1.18467	0.244489	1.17367	0.231027	0.00172366	0.0164601
TRCN0000001770	chr3	96533425:97467786	+	EPHA6	NM_173655	CDS	456.187	373.248	544.309	1.4583	0.54429	1.405	0.49057	0.00114628	0.0137829
TRCN0000006418	chr6	93949740:94129300	-	EPHA7	NM_004440	3UTR	5304.25	4601.73	6050.68	1.31487	0.394921	1.28781	0.364918	0.000545009	0.0114566
TRCN0000006419	chr6	93949740:94129300	-	EPHA7	NM_004440	CDS	3229.88	3036.89	3434.95	1.13108	0.177695	1.12288	0.167206	0.00370615	0.0221647
TRCN0000006421	chr6	93949740:94129300	-	EPHA7	NM_004440	CDS	2716.85	2584.02	2857.99	1.10603	0.145386	1.12253	0.166758	0.00677051	0.0298857
TRCN0000001345	chr1	22890004:22930087	+	EPHA8	NM_020526	3UTR	702.816	618.166	792.756	1.28243	0.358881	1.29148	0.369021	0.00335715	0.0215093
TRCN0000000817	chr3	134514099:134979307	+	EPHB1	NM_004441	3UTR	781.688	667.465	903.051	1.35296	0.436115	1.33657	0.418532	0.00323981	0.0212365
TRCN0000006424	chr1	23037331:23241823	+	EPHB2	NM_004442	CDS	9630.09	8991.63	10308.4	1.14645	0.197173	1.15485	0.207709	0.00460001	0.0247216
TRCN0000006426	chr1	23037331:23241823	+	EPHB2	NM_004442	CDS	2754.87	2603.62	2915.57	1.11981	0.163259	1.13455	0.182121	0.00711891	0.0305454
TRCN0000006429	chr3	184279587:184300196	+	EPHB3	NM_004443	CDS	5239.11	4838.42	5664.84	1.1708	0.2275	1.19799	0.260611	0.00183667	0.0168197
TRCN0000006427	chr3	184279587:184300196	+	EPHB3	NM_004443	3UTR	2990.21	2870.62	3117.28	1.08593	0.118928	1.11951	0.162873	0.0125153	0.04182
TRCN0000002018	chr7	142552776:142568847	+	EPHB6	NM_004445	CDS	1039.34	933.973	1151.3	1.23269	0.301807	1.26196	0.335672	0.00151273	0.0157265
TRCN0000002017	chr7	142552776:142568847	+	EPHB6	NM_004445	CDS	467.569	399.921	539.445	1.34888	0.431761	1.28623	0.363154	0.00793671	0.0323071
TRCN0000000619	chr12	56473809:56497291	+	ERBB3	NM_001982	3UTR	552.099	475.584	633.396	1.33183	0.413408	1.38319	0.468001	0.000326233	0.0101099
TRCN0000000623	chr12	56473809:56497291	+	ERBB3	NM_001982	CDS	587.123	535.476	641.999	1.19893	0.261748	1.22946	0.298027	0.0127801	0.0421564
TRCN0000039692	chr2	212240442:213403352	-	ERBB4	NM_005235	CDS	1920	1726.37	2125.73	1.23133	0.300222	1.24287	0.313673	0.00575016	0.0274038
TRCN0000006318	chr7	150773708:150777970	-	FASTK	NM_006712	CDS	1329.32	1180.91	1487	1.2592	0.332505	1.29565	0.373677	0.00113265	0.0137279
TRCN0000006322	chr7	150773708:150777970	-	FASTK	NM_006712	CDS	2084.94	1916.31	2264.12	1.1815	0.240619	1.2006	0.26376	0.0126478	0.0420102
TRCN0000000625	chr15	91427665:91439006	+	FES	NM_002005	CDS	783.834	691.271	882.182	1.27617	0.351824	1.26715	0.34159	0.00470627	0.0249915
TRCN0000000418	chr8	38268656:38326352	-	FGFR1	NM_000604	CDS	1726.81	1556.8	1907.44	1.22523	0.293057	1.22952	0.298096	0.00183393	0.0168197
TRCN0000001593	chr1	27938801:27961727	-	FGR	NM_005248	3UTR	1907.98	1748.25	2077.71	1.18845	0.249082	1.20146	0.264787	0.00443119	0.0242467
TRCN0000001594	chr1	27938801:27961727	-	FGR	NM_005248	CDS	2603.32	2445.27	2771.24	1.13331	0.18054	1.14883	0.200161	0.00752268	0.0313028
TRCN0000037488	NA	NA:NA	NA	FLJ30698	XM_375602	CDS	2746.32	2594.36	2907.77	1.1208	0.164532	1.12407	0.168731	0.00597118	0.0280459
TRCN0000037476	NA	NA:NA	NA	FLJ40852	NM_173677	CDS	1798.42	1606.09	2002.77	1.24698	0.318444	1.26529	0.339471	0.00145482	0.0157059
TRCN0000037477	NA	NA:NA	NA	FLJ40852	NM_173677	CDS	2709.3	2577.43	2849.41	1.10552	0.14473	1.10614	0.14553	0.00658996	0.0295539
TRCN0000037475	NA	NA:NA	NA	FLJ40852	NM_173677	CDS	4923.03	4531.28	5339.25	1.17831	0.236719	1.18459	0.244387	0.00809308	0.0327868
TRCN0000000632	chr13	28874483:29069265	-	FLT1	NM_002019	CDS	1990.75	1881.65	2106.66	1.11958	0.162955	1.12901	0.175057	0.00971982	0.0361368
TRCN0000039706	chr13	28577411:28674729	-	FLT3	NM_004119	CDS	1262.56	1164.49	1366.75	1.17369	0.231048	1.21452	0.280382	0.00321891	0.0212365
TRCN0000039703	chr13	28577411:28674729	-	FLT3	NM_004119	CDS	1910.23	1780.81	2047.74	1.14989	0.201499	1.16995	0.226452	0.00726754	0.0307261
TRCN0000000636	chr5	180028506:180076624	-	FLT4	NM_002020	CDS	399.67	365.347	436.138	1.19376	0.255518	1.23193	0.300925	0.00482127	0.025156
TRCN0000037659	chr17	80693452:80709073	+	FN3K	NM_022158	CDS	982.92	845.35	1129.09	1.33564	0.417535	1.31972	0.400237	0.00440007	0.0242467
TRCN0000037660	chr17	80693452:80709073	+	FN3K	NM_022158	CDS	2951.58	2557.18	3370.63	1.3181	0.398462	1.2766	0.352303	0.0103189	0.0373871
TRCN0000052551	chr17	80674582:80685893	+	FN3KRP	NM_024619	CDS	634.563	571.718	701.335	1.22671	0.294799	1.25779	0.330887	0.00574837	0.0274038
TRCN0000010095	chr6	116262693:116381921	-	FRK	NM_002031	CDS	2283.85	2090.99	2488.77	1.19024	0.251251	1.24051	0.310933	0.00963142	0.0359207
TRCN0000037857	chr16	70488498:70514177	+	FUK	NM_145059	CDS	1416.12	1225.02	1619.17	1.32175	0.402447	1.32197	0.402686	0.000860277	0.0131269
TRCN0000003099	chr6	111981535:112194655	-	FYN	NM_002037	CDS	3569.5	3160.99	4003.54	1.26654	0.340898	1.27715	0.352926	0.00920635	0.0348543
TRCN0000002157	chr4	843065:926178	-	GAK	NM_005255	CDS	582.184	488.617	681.599	1.39496	0.480219	1.3603	0.443929	0.00151569	0.0157265
TRCN0000010093	chr15	49447956:49622002	+	GALK2	NM_002044	CDS	4176.42	3627.51	4759.64	1.3121	0.391873	1.32564	0.406692	0.000363356	0.0104839
TRCN0000037636	chrX	30671476:30749577	+	GK	NM_000167	CDS	1982.97	1804.3	2172.81	1.20424	0.268126	1.2256	0.293492	0.00254125	0.01904
TRCN0000006168	chr9	36214439:36277053	-	GNE	NM_005476	3UTR	2032.34	1891.95	2181.51	1.15305	0.205456	1.19791	0.260516	0.00391424	0.0228027
TRCN0000006172	chr9	36214439:36277053	-	GNE	NM_005476	CDS	6035.84	5723.79	6367.4	1.11245	0.153735	1.11957	0.162939	0.00549428	0.0266637
TRCN0000001368	chr5	176853687:176869850	+	GRK6	NM_002082	CDS	365.118	302.566	431.579	1.4264	0.512378	1.39183	0.47698	0.000210195	0.00923895
TRCN0000001369	chr5	176853687:176869850	+	GRK6	NM_002082	CDS	418.161	380.326	458.361	1.20518	0.269246	1.21762	0.284065	0.0138207	0.0440094
TRCN0000038682	chr19	42734338:42746736	-	GSK3A	NM_019884	CDS	1038.67	903.765	1182.01	1.30787	0.387224	1.28152	0.357858	0.00119757	0.0140621
TRCN0000038681	chr19	42734338:42746736	-	GSK3A	NM_019884	CDS	429.587	393.727	467.69	1.18785	0.248357	1.23755	0.307485	0.0112271	0.03938
TRCN0000039765	chr19	42734338:42746736	-	GSK3A	NM_019884	CDS	1562.4	1383.96	1752	1.26593	0.340202	1.25607	0.328922	0.0133028	0.0429519
TRCN0000039999	chr3	119540802:119813264	-	GSK3B	NM_002093	CDS	1957.8	1782.62	2143.93	1.20269	0.266261	1.20635	0.270645	0.000757194	0.0127914
TRCN0000000536	chrX	108616135:108725285	-	GUCY2F	NM_001522	CDS	1327.24	1215.09	1446.4	1.19037	0.251407	1.21737	0.283769	0.00140661	0.0153681
TRCN0000000537	chrX	108616135:108725285	-	GUCY2F	NM_001522	CDS	709.928	618.099	807.496	1.30642	0.385617	1.32272	0.403508	0.00250298	0.0189154
TRCN0000000535	chrX	108616135:108725285	-	GUCY2F	NM_001522	CDS	1196.59	1118.35	1279.71	1.14429	0.194451	1.15015	0.201822	0.0073054	0.0307995
TRCN0000003202	chr7	139246316:139477693	-	HIPK2	NM_022740	CDS	1313.69	1141.85	1496.27	1.31039	0.389993	1.30871	0.388146	2.63873e-05	0.00602125
TRCN0000006996	chr19	40885178:40896094	-	HIPK4	NM_144685	3UTR	1767.55	1569.8	1977.67	1.25983	0.333224	1.27579	0.351392	0.00119477	0.0140621
TRCN0000006999	chr19	40885178:40896094	-	HIPK4	NM_144685	CDS	2944.81	2732.39	3170.5	1.16034	0.214549	1.18563	0.245651	0.00371583	0.0221647
TRCN0000006997	chr19	40885178:40896094	-	HIPK4	NM_144685	CDS	5207.01	4600.34	5851.61	1.272	0.347094	1.26364	0.337581	0.00972543	0.0361368
TRCN0000037658	chr10	71029756:71161637	+	HK1	NM_033498	CDS	7668.25	7041.08	8334.62	1.18371	0.243319	1.1908	0.25193	0.00110193	0.013498
TRCN0000037670	chr2	75059782:75120481	+	HK2	NM_000189	CDS	1991.45	1708.9	2291.67	1.34102	0.423335	1.33226	0.413873	0.000342187	0.0101843
TRCN0000037671	chr2	75059782:75120481	+	HK2	NM_000189	CDS	2020.99	1895.42	2154.4	1.13664	0.184775	1.14616	0.196814	0.0125558	0.0418432
TRCN0000010218	chr12	119616595:119632551	+	HSPB8	NM_014365	CDS	4955.46	4651.93	5277.96	1.13457	0.18215	1.13769	0.186112	0.00217526	0.0179308
TRCN0000010226	chr12	119616595:119632551	+	HSPB8	NM_014365	CDS	2298.18	2069	2541.67	1.22845	0.296843	1.24719	0.318682	0.00290266	0.0202916
TRCN0000002268	chr21	33245628:33376377	+	HUNK	NM_014586	CDS	2856.46	2612.31	3115.87	1.19276	0.254304	1.22985	0.298479	0.00347959	0.0217353
TRCN0000006325	chr6	52866098:52926600	-	ICK	NM_014920	CDS	998.841	901.512	1102.25	1.22267	0.290036	1.28852	0.36571	0.0071538	0.0305459
TRCN0000006323	chr6	52866098:52926600	-	ICK	NM_014920	3UTR	1343.88	1243.56	1450.48	1.16639	0.222055	1.21694	0.283255	0.0079362	0.0323071
TRCN0000010036	chr1	206643586:206670223	+	IKBKE	NM_014002	CDS	2369.86	2234.13	2514.08	1.12531	0.170317	1.11324	0.154766	0.00342885	0.0217353
TRCN0000039698	chr19	7112266:7294011	-	INSR	NM_000208	CDS	3990.53	3800.78	4192.13	1.10297	0.141388	1.11233	0.153581	0.0032849	0.0212863
TRCN0000003187	chr1	156810665:156828712	-	INSRR	NM_014215	CDS	1627.35	1431.61	1835.32	1.282	0.358394	1.323	0.403814	0.00100223	0.0132573
TRCN0000013508	chr3	49761728:49823973	-	IP6K1	NM_153273	3UTR	505.83	451.269	563.801	1.24937	0.321199	1.25996	0.333377	0.00448386	0.0243294
TRCN0000006140	chr3	48725436:48754711	-	IP6K2	NM_016291	3UTR	342.918	304.976	383.23	1.25659	0.329514	1.29267	0.370354	0.0101434	0.0370658
TRCN0000037812	chr6	33689443:33714762	-	IP6K3	NM_054111	CDS	1402.52	1294.43	1517.36	1.17222	0.229246	1.20004	0.263084	5.25886e-05	0.00637819
TRCN0000052601	chr10	59951278:60027694	-	IPMK	NM_152230	CDS	791.015	716.591	870.091	1.21421	0.280017	1.21287	0.27843	0.00155103	0.0159671
TRCN0000052600	chr10	59951278:60027694	-	IPMK	NM_152230	CDS	600.983	517.95	689.205	1.33064	0.412122	1.33988	0.422104	0.00280347	0.0199225
TRCN0000000545	chrX	153275957:153285342	-	IRAK1	NM_001569	CDS	906.883	818.182	1001.13	1.2236	0.291134	1.23188	0.300865	0.0044137	0.0242467
TRCN0000000543	chrX	153275957:153285342	-	IRAK1	NM_001569	3UTR	697.952	626.071	774.325	1.2368	0.306613	1.22307	0.290503	0.00576733	0.0274038
TRCN0000000546	chrX	153275957:153285342	-	IRAK1	NM_001569	CDS	1370.35	1300.7	1444.36	1.11045	0.151144	1.12891	0.174925	0.00831203	0.0333226
TRCN0000000551	chr3	10206563:10285427	+	IRAK2	NM_001570	CDS	1429.83	1300.93	1566.79	1.20436	0.26827	1.21419	0.28	0.00672942	0.0297763
TRCN0000000549	chr3	10206563:10285427	+	IRAK2	NM_001570	CDS	499.822	452.792	549.791	1.21422	0.280034	1.22467	0.292397	0.014698	0.0458798
TRCN0000002064	chr12	44152747:44183346	+	IRAK4	NM_016123	CDS	1181.22	1111	1255.84	1.13038	0.176803	1.15042	0.20216	0.0120126	0.0409772
TRCN0000037694	chr14	93403259:93582263	-	ITPK1	NM_014216	CDS	246.354	194.033	301.945	1.55616	0.637986	1.40153	0.487002	0.00095014	0.0132161
TRCN0000037697	chr14	93403259:93582263	-	ITPK1	NM_014216	CDS	5939.97	5535.87	6369.32	1.15055	0.202328	1.18084	0.239819	0.00188842	0.0168197
TRCN0000037565	chr15	41786056:41795757	+	ITPKA	NM_002220	CDS	1908.5	1709.17	2120.28	1.24054	0.310963	1.26636	0.340684	0.00103022	0.0132573
TRCN0000037564	chr15	41786056:41795757	+	ITPKA	NM_002220	CDS	1408.55	1244.93	1582.39	1.27107	0.346045	1.28443	0.361126	0.00398992	0.0229358
TRCN0000037711	chr1	226819391:226926876	-	ITPKB	NM_002221	CDS	4120.3	3881.59	4373.93	1.12684	0.172281	1.14015	0.189221	0.00695693	0.0302642
TRCN0000037718	chr19	41223008:41246765	+	ITPKC	NM_025194	CDS	923.045	801.315	1052.38	1.31332	0.393219	1.33161	0.413171	0.000576908	0.0116852
TRCN0000003102	chr1	65298906:65432187	-	JAK1	NM_002227	CDS	2162.46	1971.07	2365.81	1.20027	0.263354	1.21957	0.286371	0.00102083	0.0132573
TRCN0000003105	chr1	65298906:65432187	-	JAK1	NM_002227	CDS	1072.39	945.285	1207.44	1.27732	0.353125	1.29229	0.369927	0.00226732	0.0182414
TRCN0000003103	chr1	65298906:65432187	-	JAK1	NM_002227	CDS	942.108	835.508	1055.37	1.26315	0.337024	1.27376	0.349096	0.00562541	0.0271302
TRCN0000001688	chr4	55944426:55991762	-	KDR	NM_002253	CDS	1765.57	1622.88	1917.17	1.18134	0.240424	1.25661	0.329538	0.00746981	0.0312299
TRCN0000001686	chr4	55944426:55991762	-	KDR	NM_002253	CDS	3661.47	3497.99	3835.16	1.09639	0.132763	1.11146	0.15246	0.00838188	0.0333256
TRCN0000003211	chr1	233463514:233520894	+	KIAA1804	NM_032435	3UTR	770.48	672.681	874.391	1.29986	0.378357	1.34903	0.431918	0.000505506	0.0114252
TRCN0000003209	chr1	233463514:233520894	+	KIAA1804	NM_032435	CDS	1615.51	1473.32	1766.58	1.19904	0.261882	1.2099	0.274886	0.000949017	0.0132161
TRCN0000003210	chr1	233463514:233520894	+	KIAA1804	NM_032435	CDS	1377.54	1249.52	1513.55	1.21131	0.276564	1.22738	0.295582	0.00477714	0.0251069
TRCN0000003213	chr1	233463514:233520894	+	KIAA1804	NM_032435	CDS	555.628	496.645	618.298	1.24495	0.316086	1.26272	0.336536	0.00882566	0.0341817
TRCN0000000388	chr4	55524095:55606881	+	KIT	NM_000222	3UTR	747.378	620.582	882.1	1.42141	0.507321	1.38301	0.467816	3.05474e-06	0.00306085
TRCN0000006229	chr17	25799036:25950718	+	KSR1	XM_290793	CDS	96.6089	70.9095	123.914	1.7475	0.805295	1.46245	0.548391	0.000287162	0.00980918
TRCN0000006226	chr17	25799036:25950718	+	KSR1	XM_290793	CDS	547.341	476.935	622.147	1.30447	0.383463	1.27999	0.356128	0.00239052	0.0186586
TRCN0000007062	chr12	117890817:118406028	-	KSR2	NM_173598	CDS	2875.19	2710.66	3050.01	1.12519	0.170169	1.15363	0.206176	0.0168189	0.0497615
TRCN0000001778	chr6	149979289:150039392	-	LATS1	NM_004690	CDS	2638.55	2468.77	2818.93	1.14183	0.191352	1.16221	0.21687	0.00122111	0.014118
TRCN0000000880	chr13	21547176:21635722	-	LATS2	NM_014572	3UTR	1691.86	1516.62	1878.05	1.23831	0.308377	1.24325	0.314116	0.000707929	0.0124446
TRCN0000000884	chr13	21547176:21635722	-	LATS2	NM_014572	CDS	769.394	681.791	862.472	1.26501	0.339148	1.25966	0.333035	0.00237898	0.0186586
TRCN0000010635	chr7	97736197:97838944	+	LMTK2	NM_014916	CDS	3371.94	2937.56	3833.47	1.30498	0.384033	1.33932	0.4215	5.28407e-05	0.00637819
TRCN0000010636	chr7	97736197:97838944	+	LMTK2	NM_014916	CDS	885.976	808.379	968.422	1.19798	0.260605	1.21849	0.285094	0.00399422	0.0229358
TRCN0000021484	chr19	48988528:49016446	-	LMTK3	XM_055866	3UTR	764.432	670.114	864.645	1.29029	0.367701	1.30621	0.385388	0.000594404	0.0116878
TRCN0000021488	chr19	48988528:49016446	-	LMTK3	XM_055866	CDS	2795.08	2587.68	3015.45	1.16531	0.220715	1.19385	0.25562	0.000836685	0.013109
TRCN0000021431	NA	NA:NA	NA	LOC388226	XM_370946	CDS	967.035	896.747	1041.72	1.16166	0.216188	1.20165	0.265018	0.0121346	0.0410774
TRCN0000021537	NA	NA:NA	NA	LOC400588	XM_378664	CDS	2427.04	2234.73	2631.37	1.17749	0.235715	1.18972	0.250625	0.00310719	0.0211646
TRCN0000037435	NA	NA:NA	NA	LOC401568	XM_376950	CDS	2738.03	2536.91	2951.73	1.16351	0.218486	1.16108	0.215472	0.0031439	0.0211646
TRCN0000007042	chr15	101459460:101610317	+	LRRK1	NM_024652	CDS	2715.67	2528.76	2914.27	1.15245	0.204703	1.16613	0.221728	0.00405547	0.0230288
TRCN0000007039	chr15	101459460:101610317	+	LRRK1	NM_024652	CDS	2490.77	2077.47	2929.89	1.41032	0.496019	1.3343	0.416087	0.00539619	0.0264151
TRCN0000003156	chr15	41795840:41806085	-	LTK	NM_002344	CDS	1883.87	1731.16	2046.11	1.18193	0.241146	1.23166	0.300606	0.0115905	0.0401858
TRCN0000010106	chr8	56792386:56925006	+	LYN	NM_002350	CDS	3818.43	3631.28	4017.27	1.1063	0.145737	1.10457	0.143484	0.00672526	0.0297763
TRCN0000001787	chr6	10762956:10838788	-	MAK	NM_005906	CDS	3657.26	3436.87	3891.42	1.13226	0.1792	1.15298	0.205368	0.00421117	0.0235401
TRCN0000002328	chr15	66679211:66783882	+	MAP2K1	NM_002755	3UTR	1513.52	1358.49	1678.24	1.23537	0.304938	1.26713	0.341563	0.00576723	0.0274038
TRCN0000001390	chr17	11924135:12047148	+	MAP2K4	NM_003010	CDS	1536.17	1417.7	1662.04	1.17235	0.229409	1.19999	0.263024	0.00849151	0.0334308
TRCN0000006160	chr5	56110900:56191978	+	MAP3K1	XM_042066	CDS	1216.41	1093.46	1347.04	1.2319	0.300889	1.23094	0.299765	0.0110116	0.038909
TRCN0000001990	chr19	40697651:40721482	+	MAP3K10	NM_002446	CDS	1106.45	1039.44	1177.65	1.13297	0.180106	1.14658	0.197334	0.0137811	0.0439765
TRCN0000007105	chr3	185000729:185206882	+	MAP3K13	NM_004721	CDS	2204.08	2033.98	2384.81	1.17248	0.229568	1.19424	0.256093	0.00369335	0.0221647
TRCN0000000731	chr17	43340486:43394430	-	MAP3K14	NM_003954	CDS	1358	1131.67	1598.49	1.4125	0.498251	1.37098	0.455206	1.79263e-05	0.00553144
TRCN0000021404	chrX	19378176:19533379	-	MAP3K15	XM_372199	3UTR	1436.12	1255	1628.55	1.29765	0.375899	1.31001	0.38958	0.00102844	0.0132573
TRCN0000000850	chr6	161412759:161538417	+	MAP3K4	NM_005922	CDS	1551.36	1410.19	1701.36	1.20647	0.270797	1.23218	0.301217	0.00371624	0.0221647
TRCN0000000991	chr6	136878187:137113656	-	MAP3K5	NM_005923	3UTR	610.41	497.648	730.219	1.46734	0.553204	1.36625	0.450218	0.00121136	0.0141138
TRCN0000002346	chr1	27681670:27693337	-	MAP3K6	NM_004672	3UTR	1046.39	984.252	1112.42	1.13022	0.176605	1.16018	0.214351	0.0163739	0.0489577
TRCN0000001554	chr6	91223292:91297020	-	MAP3K7	NM_145332	3UTR	869.367	754.452	991.464	1.31415	0.394132	1.34108	0.423395	0.000317776	0.0100393
TRCN0000021498	chr14	71189243:71275888	-	MAP3K9	XM_027237	CDS	1883.47	1668.36	2112.02	1.26593	0.340194	1.28287	0.359372	0.000642206	0.0120654
TRCN0000021497	chr14	71189243:71275888	-	MAP3K9	XM_027237	CDS	2229.49	2062.99	2406.4	1.16646	0.22214	1.19874	0.261514	0.0137621	0.0439626
TRCN0000001636	chr19	39078280:39108675	-	MAP4K1	NM_007181	CDS	3260.95	3093.93	3438.41	1.11134	0.152298	1.1275	0.173129	0.00189683	0.0168197
TRCN0000002235	chr11	64556609:64570713	-	MAP4K2	NM_004579	3UTR	1405.5	1288.71	1529.59	1.18692	0.247222	1.21185	0.277213	0.000667227	0.0120787
TRCN0000002236	chr11	64556609:64570713	-	MAP4K2	NM_004579	CDS	1807.72	1596.43	2032.21	1.27298	0.348205	1.3169	0.397145	0.00164596	0.0162221
TRCN0000000666	chr2	39476407:39664453	-	MAP4K3	NM_003618	CDS	1702.34	1534.2	1880.99	1.22604	0.294006	1.24005	0.310402	0.000197164	0.009211
TRCN0000000665	chr2	39476407:39664453	-	MAP4K3	NM_003618	CDS	3965.59	3764.91	4178.81	1.10994	0.150477	1.11704	0.159686	0.000258762	0.00977013
TRCN0000000667	chr2	39476407:39664453	-	MAP4K3	NM_003618	CDS	1082.59	964.469	1208.1	1.25261	0.324933	1.28032	0.356503	0.000282673	0.00980918
TRCN0000001832	chr2	102314165:102511152	+	MAP4K4	NM_145687	3UTR	736.748	620.152	860.632	1.38777	0.472774	1.36103	0.444698	0.000303103	0.00991009
TRCN0000010050	chr22	22113947:22221970	-	MAPK1	NM_138957	CDS	3723.58	3432.19	4033.18	1.1751	0.232789	1.19566	0.257806	0.00218745	0.0179308
TRCN0000010041	chr22	22113947:22221970	-	MAPK1	NM_138957	CDS	5195.75	4873.94	5537.67	1.13618	0.184193	1.15348	0.205992	0.00327932	0.0212863
TRCN0000006145	chr22	50691331:50700089	-	MAPK12	NM_002969	CDS	2228.8	1903.09	2574.87	1.353	0.436162	1.28584	0.362711	0.00895644	0.0344681
TRCN0000009978	chr6	36098261:36112301	+	MAPK13	NM_002754	CDS	1858.18	1604.4	2127.81	1.32623	0.407335	1.35991	0.443515	0.00073776	0.0127328
TRCN0000000513	chr6	35995454:36079013	+	MAPK14	NM_001315	CDS	542.754	464.044	626.383	1.34984	0.432783	1.28891	0.366148	0.0101728	0.0370658
TRCN0000006151	chr16	30125426:30134630	-	MAPK3	NM_002746	CDS	1203.64	1003.2	1416.6	1.41209	0.497827	1.35706	0.440487	0.00164586	0.0162221
TRCN0000001568	chr15	52311411:52358462	+	MAPK6	NM_002748	3UTR	398.624	365.561	433.752	1.18654	0.246758	1.22012	0.287018	0.00784339	0.03222
TRCN0000001356	chr17	19281034:19286857	+	MAPK7	NM_139034	CDS	2212.7	1975.54	2464.67	1.2476	0.319151	1.26488	0.339004	0.00319101	0.0211748
TRCN0000000946	chr5	179660595:179719071	-	MAPK9	NM_139069	CDS	2301.75	2067.86	2550.27	1.23329	0.302511	1.25774	0.330834	0.00026925	0.00977013
TRCN0000002282	chr1	206858365:206907630	+	MAPKAPK2	NM_032960	CDS	564.123	499.247	633.053	1.26801	0.342571	1.28007	0.356227	0.000894243	0.0131476
TRCN0000006154	chr3	50649293:50686728	+	MAPKAPK3	NM_004635	CDS	3261.82	3121.44	3410.99	1.09276	0.127978	1.11874	0.16188	0.00533104	0.0263342
TRCN0000007156	chr19	45754516:45808541	+	MARK4	NM_031417	3UTR	564.025	475.727	657.841	1.38281	0.467603	1.40868	0.49434	0.000331008	0.010128
TRCN0000021547	chr19	12949259:12985766	+	MAST1	NM_014975	CDS	3127.1	2849.51	3422.03	1.20092	0.264139	1.2432	0.314063	0.00593341	0.0279558
TRCN0000001735	chr1	46269285:46501796	+	MAST2	NM_015112	CDS	2990.22	2837.23	3152.77	1.11122	0.152139	1.11786	0.160744	0.016593	0.0492384
TRCN0000021442	chr19	18208603:18262499	+	MAST3	XM_038150	CDS	434.515	365.54	507.801	1.38918	0.474233	1.39039	0.475487	0.000378591	0.0104839
TRCN0000021439	chr19	18208603:18262499	+	MAST3	XM_038150	3UTR	504.982	426.53	588.338	1.37936	0.464	1.35728	0.440718	0.0027631	0.0196822
TRCN0000002278	chr10	27443753:27475848	+	MASTL	NM_032844	CDS	583.785	530.427	640.477	1.20747	0.271993	1.21959	0.286396	0.01684	0.0497747
TRCN0000001642	chr9	36572859:36677680	+	MELK	NM_014791	3UTR	3089.31	2629.17	3578.21	1.36097	0.444631	1.36214	0.445878	0.000380153	0.0104839
TRCN0000000865	chr2	112656191:112786945	+	MERTK	NM_006343	CDS	1063.21	900.878	1235.69	1.37165	0.45591	1.37293	0.457259	0.00013961	0.00817181
TRCN0000000864	chr2	112656191:112786945	+	MERTK	NM_006343	CDS	1210.41	1137.59	1287.79	1.13203	0.178918	1.15963	0.21366	0.00486179	0.0251975
TRCN0000006240	chr17	4736635:4801356	+	MINK1	NM_015716	CDS	1324.88	1191.54	1466.56	1.23081	0.299612	1.28255	0.35901	0.00239565	0.0186586
TRCN0000003224	chr16	74705753:74734789	-	MLKL	NM_152649	CDS	2296	1871	2747.56	1.4685	0.554339	1.3911	0.476228	4.47177e-05	0.00637819
TRCN0000003225	chr16	74705753:74734789	-	MLKL	NM_152649	CDS	1382.04	1279.89	1490.57	1.1646	0.219839	1.20045	0.263572	0.0122258	0.041293
TRCN0000029674	chr17	60704762:60770962	+	MRC2	NM_006039	CDS	2504.02	2338.62	2679.75	1.14587	0.196438	1.16066	0.214945	0.00856443	0.0334984
TRCN0000029677	chr17	60704762:60770962	+	MRC2	NM_006039	CDS	1045.52	942.836	1154.62	1.22462	0.292335	1.24286	0.31366	0.00885814	0.0341817
TRCN0000003107	chr3	49924436:49941306	-	MST1R	NM_002447	CDS	2549.71	2366.52	2744.35	1.15965	0.213695	1.17534	0.233076	0.00656215	0.0295539
TRCN0000038674	chr1	11166588:11322608	-	MTOR	NM_004958	3UTR	1003.19	854.182	1161.51	1.35979	0.443389	1.36127	0.444955	2.02415e-05	0.00553144
TRCN0000038676	chr1	11166588:11322608	-	MTOR	NM_004958	CDS	948.573	841.527	1062.31	1.26236	0.336122	1.28333	0.359896	0.00134305	0.0150546
TRCN0000038677	chr1	11166588:11322608	-	MTOR	NM_004958	CDS	475.665	414.07	541.11	1.30681	0.386048	1.35768	0.441146	0.00259992	0.0192497
TRCN0000039784	chr1	11166588:11322608	-	MTOR	NM_004958	CDS	1323.02	1212.4	1440.54	1.18817	0.248746	1.24161	0.312216	0.00334016	0.0215
TRCN0000039787	chr1	11166588:11322608	-	MTOR	NM_004958	CDS	1538.92	1416.89	1668.58	1.17764	0.235893	1.22481	0.292562	0.00998236	0.0368184
TRCN0000002167	chr9	113431051:113563278	+	MUSK	NM_005592	CDS	800.909	738.991	866.697	1.17281	0.229972	1.20632	0.270613	0.000992909	0.0132573
TRCN0000002164	chr9	113431051:113563278	+	MUSK	NM_005592	CDS	549.127	484.885	617.383	1.27326	0.348524	1.28278	0.359276	0.00255463	0.01904
TRCN0000010070	chr12	110011500:110035071	+	MVK	NM_000431	CDS	3351.7	2877.48	3855.56	1.33991	0.422133	1.30267	0.381474	0.0109892	0.0389088
TRCN0000000935	chr3	123331143:123603149	-	MYLK	NM_053028	CDS	233.458	197.581	271.578	1.37452	0.458923	1.30984	0.389391	0.00729907	0.0307995
TRCN0000000934	chr20	30407178:30422500	+	MYLK2	NM_033118	CDS	1452.22	1295.81	1618.41	1.24895	0.320716	1.25248	0.324786	0.00058576	0.0116852
TRCN0000037447	chr6	2663863:2751154	-	MYLK4	XM_373109	CDS	3142.7	3015.58	3277.76	1.08694	0.120277	1.10256	0.140853	0.01312	0.0426365
TRCN0000037703	chr1	1682671:1711508	-	NADK	NM_023018	CDS	1611.96	1367.62	1871.57	1.36848	0.452574	1.35262	0.435753	0.000210538	0.00923895
TRCN0000037620	chr2	71295408:71305998	+	NAGK	NM_017567	CDS	1280.81	1150.96	1418.79	1.2327	0.301823	1.26633	0.340658	0.000650013	0.0120787
TRCN0000037619	chr2	71295408:71305998	+	NAGK	NM_017567	CDS	5479.33	5213.53	5761.75	1.10515	0.144247	1.11465	0.156585	0.00180414	0.0168197
TRCN0000021583	chr4	170314421:170533778	-	NEK1	NM_012224	CDS	1145.18	979.093	1321.64	1.34986	0.432812	1.35375	0.436964	0.000167324	0.00861412
TRCN0000021579	chr4	170314421:170533778	-	NEK1	NM_012224	3UTR	4477.31	4253.82	4714.78	1.10836	0.148433	1.12084	0.164582	0.0083709	0.0333256
TRCN0000002287	chr3	27257097:27410912	-	NEK10	NM_152534	CDS	1584.57	1387.58	1793.87	1.2928	0.370499	1.3115	0.391219	0.00188668	0.0168197
TRCN0000002291	chr3	27257097:27410912	-	NEK10	NM_152534	CDS	786.445	718.342	858.804	1.19554	0.257659	1.23626	0.305987	0.00468609	0.0249837
TRCN0000001697	chr3	52744796:52804965	-	NEK4	NM_003157	3UTR	1785.7	1558.54	2027.06	1.30061	0.379192	1.27985	0.35597	0.00616875	0.0285281
TRCN0000021409	chr13	52638900:52703214	-	NEK5	XM_292160	3UTR	791.582	695.334	893.844	1.28549	0.362317	1.31544	0.39554	0.00130365	0.0147878
TRCN0000021410	chr13	52638900:52703214	-	NEK5	XM_292160	CDS	460.496	398.066	526.827	1.32347	0.404322	1.30592	0.385066	0.0121311	0.0410774
TRCN0000001967	chr1	198126108:198291548	+	NEK7	NM_133494	CDS	352.311	309.429	397.873	1.28583	0.362698	1.30016	0.378689	0.00989502	0.0366311
TRCN0000007089	chr17	27055832:27069784	+	NEK8	NM_178170	CDS	2166.63	1948.37	2398.53	1.23105	0.299886	1.25705	0.33004	0.00164287	0.0162221
TRCN0000007091	chr17	27055832:27069784	+	NEK8	NM_178170	CDS	1288.46	1144.33	1441.61	1.25979	0.333184	1.26748	0.341966	0.00607719	0.0283598
TRCN0000000928	chr14	75548818:75593778	-	NEK9	NM_033116	CDS	1664.89	1482.39	1858.8	1.25392	0.326448	1.25911	0.332403	0.000730169	0.0127328
TRCN0000000929	chr14	75548818:75593778	-	NEK9	NM_033116	CDS	1701.79	1558.6	1853.92	1.18948	0.250329	1.19641	0.258711	0.00586669	0.0276849
TRCN0000010055	chr17	49230920:49239450	+	NME1	NM_000269	CDS	3459.53	3302.71	3626.15	1.09793	0.13479	1.12295	0.167288	0.00659702	0.0295539
TRCN0000010110	chr17	49242796:49249105	+	NME2	NM_002512	CDS	1803.07	1631.99	1984.85	1.21622	0.282398	1.22801	0.296328	0.00171446	0.0164601
TRCN0000006175	chr5	137450861:137475132	-	NME5	NM_003551	CDS	604.375	554.533	657.332	1.18538	0.245348	1.17479	0.232398	0.0153178	0.0470811
TRCN0000006174	chr5	137450861:137475132	-	NME5	NM_003551	CDS	1055.74	984.479	1131.46	1.1493	0.200756	1.18036	0.23923	0.0169194	0.0498626
TRCN0000010221	chr1	169101768:169337201	-	NME7	NM_013330	CDS	5703.95	5076.23	6370.91	1.25505	0.327742	1.31809	0.398449	0.000891688	0.0131476
TRCN0000007327	chr1	153651164:153666468	+	NPR1	NM_000906	CDS	979.762	918.318	1045.05	1.138	0.1865	1.16736	0.223255	0.00540697	0.0264151
TRCN0000001314	chr9	35792406:35809728	+	NPR2	NM_003995	CDS	678.719	588.432	774.649	1.31646	0.396668	1.28749	0.364557	0.00813524	0.0329132
TRCN0000001437	chr2	27651473:27665124	+	NRBP1	NM_013392	3UTR	1348.16	1160.56	1547.48	1.33339	0.415104	1.28689	0.36389	0.0147401	0.0459633
TRCN0000001993	chr1	156785542:156851642	+	NTRK1	NM_002529	CDS	655.734	555.961	761.743	1.37014	0.454319	1.34123	0.423556	0.00216649	0.0179308
TRCN0000002243	chr9	87283373:87641985	+	NTRK2	NM_006180	CDS	2564.02	2330.28	2812.36	1.20687	0.271275	1.21916	0.285885	0.000610235	0.0118142
TRCN0000002246	chr9	87283373:87641985	+	NTRK2	NM_006180	3UTR	1611.55	1377.56	1860.18	1.35035	0.433329	1.33263	0.41428	0.00391142	0.0228027
TRCN0000000899	chr12	106457125:106533811	-	NUAK1	NM_014840	3UTR	1107.09	1009.13	1211.18	1.20021	0.263289	1.22535	0.293189	0.00750601	0.0312941
TRCN0000021599	chr1	228395831:228566575	+	OBSCN	NM_052843	3UTR	671.411	556.592	793.406	1.42547	0.511441	1.39101	0.476128	0.000681978	0.0121303
TRCN0000021600	chr1	228395831:228566575	+	OBSCN	NM_052843	CDS	2808.38	2587.26	3043.32	1.17627	0.234218	1.16528	0.220682	0.000937874	0.0132161
TRCN0000002227	chr11	77033060:77185108	-	PAK1	NM_002576	3UTR	458.55	399.551	521.237	1.30456	0.383558	1.30821	0.387593	0.0026457	0.0192503
TRCN0000001751	chr15	40509629:40569688	+	PAK6	NM_020168	CDS	1950.04	1823.58	2084.41	1.14303	0.192866	1.1436	0.193582	0.0161208	0.0484792
TRCN0000007111	chr20	9518037:9819687	-	PAK7	NM_020341	CDS	1014.71	900.479	1136.09	1.26165	0.335311	1.25152	0.323678	0.000787828	0.012969
TRCN0000037559	chr10	91339254:91405329	-	PANK1	NM_138316	3UTR	781.591	656.118	914.906	1.39442	0.479668	1.35154	0.43461	0.00346563	0.0217353
TRCN0000037560	chr10	91339254:91405329	-	PANK1	NM_138316	CDS	3092.25	2912.84	3282.88	1.12704	0.172535	1.13358	0.180892	0.00598175	0.0280517
TRCN0000037704	chr5	167982628:168006614	-	PANK3	NM_024594	CDS	4019.63	3690.07	4369.79	1.1842	0.243915	1.18652	0.246732	0.000565649	0.0116432
TRCN0000010179	chr4	108534822:108641419	-	PAPSS1	NM_005443	CDS	4487.64	4195.79	4797.74	1.14347	0.193412	1.15497	0.207854	0.000399936	0.0105579
TRCN0000052653	chr20	56136137:56141513	+	PCK1	NM_002591	CDS	388.918	349.074	431.252	1.23542	0.305001	1.22809	0.296415	0.0146786	0.0458669
TRCN0000001422	chr4	55095264:55164412	+	PDGFRA	NM_006206	3UTR	387.234	311.683	467.507	1.49994	0.584906	1.38309	0.467894	0.00162211	0.0161995
TRCN0000001424	chr4	55095264:55164412	+	PDGFRA	NM_006206	CDS	1040.04	940.374	1145.93	1.21859	0.285207	1.28146	0.357792	0.00452663	0.0244731
TRCN0000001999	chr5	149493402:149535422	-	PDGFRB	NM_002609	3UTR	2277.75	2089.62	2477.64	1.18569	0.245727	1.216	0.282147	0.00016797	0.00861412
TRCN0000002292	chr1	26437656:26452039	+	PDIK1L	NM_152835	CDS	1431.95	1295.74	1576.68	1.21682	0.283112	1.25838	0.331569	0.011493	0.0399475
TRCN0000002318	chr17	48172101:48188733	+	PDK2	NM_002611	3UTR	642.783	576.257	713.468	1.23811	0.308135	1.25718	0.330192	0.00168913	0.0163791
TRCN0000000261	chrX	24483344:24568583	+	PDK3	NM_005391	CDS	2409.63	2166.38	2668.08	1.23159	0.300519	1.23605	0.305735	3.29659e-05	0.00602125
TRCN0000000259	chrX	24483344:24568583	+	PDK3	NM_005391	3UTR	357.298	313.021	404.344	1.29175	0.369325	1.29241	0.370059	0.00285779	0.0201183
TRCN0000006265	chr7	95212809:95225925	-	PDK4	NM_002612	CDS	3487.72	3233.67	3757.64	1.16204	0.216654	1.20692	0.271334	0.000736336	0.0127328
TRCN0000006267	chr7	95212809:95225925	-	PDK4	NM_002612	CDS	1631.06	1484.65	1786.63	1.20341	0.267124	1.24729	0.318799	0.000762476	0.0127914
TRCN0000037441	chr15	77400498:77712446	-	PEAK1	XM_370878	CDS	964.578	860.426	1075.24	1.24966	0.321536	1.28351	0.36009	0.001074	0.0134366
TRCN0000037590	chrX	54959567:55024967	-	PFKFB1	NM_002625	CDS	7462.8	6897.89	8063.01	1.16891	0.225162	1.16992	0.226414	0.00027651	0.00980918
TRCN0000037963	chr1	207226620:207254368	+	PFKFB2	NM_006212	CDS	2939.17	2712.76	3179.72	1.17213	0.229138	1.22098	0.288035	0.00390059	0.0228027
TRCN0000010111	chr21	45719917:45747264	+	PFKL	NM_002626	CDS	1636.08	1412.19	1873.96	1.32698	0.408149	1.33482	0.416648	0.000980184	0.0132573
TRCN0000037776	chr10	3109712:3178997	+	PFKP	NM_002627	CDS	800.79	717.08	889.733	1.24077	0.311237	1.25212	0.324371	0.00962256	0.0359207
TRCN0000006179	chrX	77359666:77382324	+	PGK1	NM_000291	CDS	1408.88	1245.08	1582.91	1.27133	0.346342	1.28739	0.364445	0.000333556	0.010128
TRCN0000037786	chr6	49753364:49755053	-	PGK2	NM_138733	CDS	1038.61	936.997	1146.58	1.22368	0.291227	1.26036	0.333838	0.00424866	0.0236435
TRCN0000006200	chr16	47495210:47735434	+	PHKB	NM_000293	CDS	948.774	857.875	1045.35	1.21854	0.285152	1.18271	0.242097	0.00373958	0.0222598
TRCN0000006201	chr7	56147976:56160689	-	PHKG1	NM_006213	3UTR	1107.93	971.222	1253.19	1.29032	0.367733	1.28919	0.366468	0.00913157	0.0347462
TRCN0000037604	chr10	99400443:99436187	+	PI4K2A	NM_018425	CDS	971.573	895.31	1052.6	1.17569	0.233502	1.19534	0.257426	0.000436288	0.0107498
TRCN0000037608	chr10	99400443:99436187	+	PI4K2A	NM_018425	CDS	6270.75	5748.37	6825.77	1.18743	0.247838	1.21564	0.281718	0.000535127	0.0114566
TRCN0000037606	chr10	99400443:99436187	+	PI4K2A	NM_018425	CDS	1920.08	1811.66	2035.27	1.12343	0.167909	1.15863	0.212416	0.0113012	0.0395769
TRCN0000037584	chr4	25235653:25280831	+	PI4K2B	NM_018323	CDS	4385.45	3975.42	4821.11	1.21273	0.278258	1.23745	0.307365	0.00042784	0.0107034
TRCN0000037585	chr4	25235653:25280831	+	PI4K2B	NM_018323	CDS	3970.24	3523.58	4444.82	1.26145	0.335084	1.27758	0.35341	0.000743907	0.0127328
TRCN0000037588	chr4	25235653:25280831	+	PI4K2B	NM_018323	CDS	2557.24	2430.35	2692.06	1.10769	0.147549	1.11053	0.151245	0.015203	0.0468719
TRCN0000005692	chr1	151264273:151300191	-	PI4KB	NM_002651	3UTR	2736.46	2555.99	2928.21	1.14563	0.196137	1.16391	0.218978	0.000921459	0.0132161
TRCN0000039605	chr3	178866311:178952497	+	PIK3CA	NM_006218	CDS	3105.35	2792.41	3437.84	1.23114	0.299994	1.23279	0.30193	0.000854744	0.013109
TRCN0000033274	chr1	9711790:9789172	+	PIK3CD	NM_005026	CDS	1039.86	929.026	1157.63	1.24607	0.317381	1.26715	0.341586	0.000300828	0.00991009
TRCN0000000885	chr3	130397778:130465696	-	PIK3R4	NM_014602	3UTR	4854.62	4342.16	5399.11	1.24342	0.314311	1.29963	0.378105	0.000318802	0.0100393
TRCN0000000888	chr3	130397778:130465696	-	PIK3R4	NM_014602	CDS	2197.92	2037.82	2368.02	1.16204	0.216656	1.18735	0.247741	0.00431829	0.0238617
TRCN0000000887	chr3	130397778:130465696	-	PIK3R4	NM_014602	CDS	4008	3703.06	4331.99	1.16984	0.226309	1.20207	0.265516	0.00484156	0.025156
TRCN0000010118	chr6	37137922:37143204	+	PIM1	NM_002648	CDS	2642.59	2428.24	2870.34	1.18207	0.24131	1.21744	0.283856	0.000183996	0.00906708
TRCN0000010117	chr6	37137922:37143204	+	PIM1	NM_002648	CDS	1416.33	1298.78	1541.23	1.18667	0.246916	1.2115	0.276798	0.00295699	0.0206007
TRCN0000001629	chrX	48770459:48776413	-	PIM2	NM_006875	CDS	1638.04	1445.61	1842.5	1.27455	0.349988	1.25981	0.333207	0.00239594	0.0186586
TRCN0000001627	chrX	48770459:48776413	-	PIM2	NM_006875	3UTR	4906.29	4713.06	5111.59	1.08456	0.117108	1.08854	0.122395	0.00271703	0.0194409
TRCN0000006011	chr10	22823766:23003503	-	PIP4K2A	NM_005028	CDS	859.974	759.38	966.855	1.27322	0.348479	1.30232	0.381079	0.000905371	0.0131476
TRCN0000006013	chr17	36921944:36956158	-	PIP4K2B	NM_003559	3UTR	158.982	122.916	197.303	1.60519	0.682744	1.42731	0.513294	0.000815454	0.013109
TRCN0000037720	chr12	57984942:57997211	+	PIP4K2C	NM_024779	CDS	2098.72	1875.18	2336.23	1.24587	0.317158	1.26587	0.340134	0.00134784	0.0150546
TRCN0000037719	chr12	57984942:57997211	+	PIP4K2C	NM_024779	CDS	873.098	782.798	969.042	1.23792	0.307918	1.2544	0.327003	0.00713558	0.0305454
TRCN0000037721	chr12	57984942:57997211	+	PIP4K2C	NM_024779	CDS	973.349	888.32	1063.69	1.19742	0.25993	1.21967	0.286496	0.0158643	0.0478797
TRCN0000010138	chr1	151171021:151222007	+	PIP5K1A	NM_003557	CDS	814.371	680.15	956.982	1.40702	0.492638	1.35389	0.437114	0.00318622	0.0211748
TRCN0000037859	chr9	71320330:71624092	+	PIP5K1B	NM_003558	CDS	718.061	651.791	788.472	1.2097	0.274651	1.23295	0.302116	0.00110463	0.013498
TRCN0000052538	chr9	130683808:130693076	-	PIP5KL1	NM_173492	3UTR	756.408	642.555	877.377	1.36545	0.449377	1.37605	0.460529	0.00186802	0.0168197
TRCN0000052540	chr9	130683808:130693076	-	PIP5KL1	NM_173492	CDS	299.324	263.603	337.278	1.27949	0.355569	1.27534	0.350883	0.00237744	0.0186586
TRCN0000037532	chr2	42275161:42285668	+	PKDCC	XM_038576	CDS	3450.05	3057.56	3867.07	1.26476	0.338863	1.29445	0.372342	0.00106934	0.0134366
TRCN0000006383	chr1	155259084:155271225	-	PKLR	NM_000298	3UTR	970.568	829.086	1120.89	1.35196	0.435054	1.37985	0.464511	0.00117256	0.0139428
TRCN0000037613	NA	NA:NA	NA	PKM2	NM_182471	CDS	1478.78	1322.9	1644.41	1.24303	0.313864	1.28582	0.362694	0.00215046	0.0179308
TRCN0000037609	NA	NA:NA	NA	PKM2	NM_182471	CDS	2023.46	1907.22	2146.97	1.1257	0.170829	1.15576	0.208845	0.00609463	0.0283598
TRCN0000006252	chr1	89149922:89301938	+	PKN2	NM_006256	CDS	1509.39	1428.48	1595.35	1.11682	0.159396	1.14365	0.193644	0.00683146	0.0299983
TRCN0000006246	chr16	23690201:23701688	+	PLK1	NM_005030	CDS	3695.99	3404.46	4005.74	1.17662	0.234643	1.21244	0.277908	0.000960843	0.0132163
TRCN0000021569	chrX	152935188:152939816	-	PNCK	NM_198452	3UTR	3010.49	2761.35	3275.2	1.18609	0.246208	1.21527	0.281275	0.0158332	0.0478646
TRCN0000002170	chr1	57110990:57181008	+	PRKAA2	NM_006252	CDS	1089.35	941.853	1246.06	1.32299	0.403799	1.37043	0.454629	0.000375109	0.0104839
TRCN0000002172	chr1	57110990:57181008	+	PRKAA2	NM_006252	3UTR	168.059	146.477	190.99	1.30389	0.382817	1.28262	0.359091	0.0165414	0.0491824
TRCN0000002004	chr1	84543745:84704181	+	PRKACB	NM_002731	3UTR	745.06	694.918	798.336	1.14882	0.200153	1.18048	0.239379	0.00755773	0.0313359
TRCN0000002003	chr1	84543745:84704181	+	PRKACB	NM_002731	CDS	328.451	300.761	357.871	1.18988	0.250818	1.22179	0.288991	0.00884601	0.0341817
TRCN0000001690	chr17	64298926:64806862	+	PRKCA	NM_002737	CDS	1828.78	1525.15	2151.39	1.41061	0.49632	1.38007	0.464737	7.47252e-05	0.00686112
TRCN0000001694	chr17	64298926:64806862	+	PRKCA	NM_002737	3UTR	2699.88	2513.94	2897.43	1.15255	0.204824	1.15947	0.213469	0.00349045	0.0217353
TRCN0000000845	chr2	45879043:46415129	+	PRKCE	NM_005400	CDS	1527.14	1387.91	1675.08	1.20691	0.271322	1.22361	0.291149	0.00484192	0.025156
TRCN0000002325	chr19	54385467:54410901	+	PRKCG	NM_002739	CDS	3741.66	3445.71	4056.1	1.17715	0.235293	1.22689	0.295003	0.00105948	0.0134366
TRCN0000006298	chr14	61788515:62017698	+	PRKCH	NM_006255	CDS	5271.18	4736.77	5839	1.2327	0.301819	1.24235	0.313067	0.0026516	0.0192503
TRCN0000006294	chr14	61788515:62017698	+	PRKCH	NM_006255	3UTR	1984.54	1806.44	2173.76	1.20334	0.267043	1.23932	0.309551	0.00456571	0.0246401
TRCN0000006037	chr3	169940220:170023770	+	PRKCI	NM_002740	3UTR	1334.7	1235.09	1440.54	1.16634	0.221991	1.17705	0.235172	0.00792281	0.0323071
TRCN0000001218	chr1	1981909:2116834	+	PRKCZ	NM_002744	3UTR	844.624	700.989	997.237	1.42261	0.508545	1.3813	0.466028	0.00015314	0.00836981
TRCN0000002124	chr14	30045687:30396899	-	PRKD1	NM_002742	CDS	322.432	281.62	365.796	1.2989	0.377289	1.30882	0.388266	0.00673583	0.0297763
TRCN0000001948	chr19	47177573:47220384	-	PRKD2	NM_016457	CDS	413.611	359.867	470.714	1.30802	0.387387	1.27994	0.356076	0.00645993	0.0292889
TRCN0000001416	chr2	37477646:37544222	-	PRKD3	NM_005813	CDS	1409.44	1291.52	1534.72	1.1883	0.248903	1.17852	0.236973	0.0151813	0.0468531
TRCN0000006258	chr8	48685669:48872743	-	PRKDC	NM_006904	CDS	797.226	659.002	944.089	1.43261	0.518641	1.38746	0.472444	0.000536903	0.0114566
TRCN0000006259	chr8	48685669:48872743	-	PRKDC	NM_006904	CDS	1697.74	1604.99	1796.29	1.11919	0.162452	1.15713	0.210546	0.00217139	0.0179308
TRCN0000006257	chr8	48685669:48872743	-	PRKDC	NM_006904	CDS	1139.36	1059.81	1223.88	1.15481	0.207653	1.1424	0.192063	0.00460549	0.0247216
TRCN0000001507	chr4	82008524:82136271	-	PRKG2	NM_006259	3UTR	1026.73	919.245	1140.93	1.24116	0.311691	1.26148	0.335115	0.0129089	0.042229
TRCN0000006344	chrY	7142013:7249588	+	PRKY	NM_002760	CDS	2011.54	1781.99	2255.43	1.26568	0.339912	1.31593	0.396079	0.000600333	0.0117182
TRCN0000006343	chrY	7142013:7249588	+	PRKY	NM_002760	3UTR	3368.32	3110.33	3642.43	1.17108	0.227835	1.16829	0.224399	0.0109711	0.0388905
TRCN0000006345	chrY	7142013:7249588	+	PRKY	NM_002760	CDS	1550.03	1427.85	1679.85	1.17649	0.234485	1.20684	0.271238	0.0119376	0.0409172
TRCN0000010123	chrX	106871654:106894256	+	PRPS1	NM_002764	CDS	3758.89	3479.99	4055.22	1.1653	0.220699	1.19181	0.253157	0.013073	0.0425297
TRCN0000010131	chrX	12809474:12842346	+	PRPS2	NM_002765	CDS	1888.14	1662.24	2128.17	1.2803	0.35648	1.28653	0.363482	0.00166774	0.0162241
TRCN0000001445	NA	NA:NA	NA	PSK	NM_016151	CDS	2628.83	2469.14	2798.49	1.13339	0.180643	1.15321	0.205653	0.00394164	0.0229052
TRCN0000001443	NA	NA:NA	NA	PSK	NM_016151	CDS	1407.31	1256.5	1567.55	1.24754	0.319092	1.25274	0.325083	0.00452633	0.0244731
TRCN0000001708	chr16	67927175:67963581	+	PSKH1	NM_006742	3UTR	2006.11	1687.33	2344.81	1.38966	0.474735	1.30957	0.389092	0.00565821	0.0271703
TRCN0000001709	chr16	67927175:67963581	+	PSKH1	NM_006742	CDS	1783.61	1693.32	1879.54	1.10998	0.150529	1.13082	0.177372	0.0137218	0.0439274
TRCN0000000770	chr8	27168999:27316908	+	PTK2B	NM_004103	CDS	1235.05	1029.91	1453.01	1.41082	0.496531	1.30978	0.38932	0.0103231	0.0373871
TRCN0000021549	chr20	62159776:62168723	-	PTK6	NM_005975	3UTR	2319.18	2177.15	2470.1	1.13455	0.182126	1.15556	0.20859	0.0022274	0.0180473
TRCN0000006431	chr6	43044006:43129458	+	PTK7	NM_002821	3UTR	2018.11	1844.23	2202.86	1.19446	0.256359	1.20861	0.273354	0.00126168	0.0144206
TRCN0000006435	chr6	43044006:43129458	+	PTK7	NM_002821	CDS	6275.84	5974.36	6596.16	1.10408	0.142841	1.10782	0.147723	0.00444839	0.0242467
TRCN0000001065	chr3	12625100:12705700	-	RAF1	NM_002880	CDS	811.602	720.584	908.31	1.26052	0.334019	1.27794	0.353819	0.00798751	0.0324028
TRCN0000001715	NA	NA:NA	NA	RAGE	NM_014226	CDS	4152.27	3849.91	4473.53	1.16198	0.216588	1.17534	0.233073	0.00585846	0.0276849
TRCN0000010044	chr2	28004231:28113263	-	RBKS	NM_022128	CDS	6510.96	5865.42	7196.85	1.227	0.295131	1.25759	0.330662	0.00185417	0.0168197
TRCN0000010048	chr2	28004231:28113263	-	RBKS	NM_022128	CDS	1862.35	1610.07	2130.39	1.32317	0.403993	1.32373	0.404609	0.00204941	0.0176015
TRCN0000000403	chr10	43572517:43625797	+	RET	NM_000323	CDS	908.739	848.61	972.626	1.14614	0.196783	1.15792	0.211541	0.00170729	0.0164491
TRCN0000040026	chr10	43572517:43625797	+	RET	NM_000323	CDS	965.581	857.401	1080.52	1.26023	0.333689	1.29729	0.375501	0.00355775	0.0218703
TRCN0000037602	chr9	79000433:79009444	-	RFK	NM_018339	CDS	1339.28	1218.72	1467.37	1.20402	0.267863	1.2296	0.298188	0.00937463	0.0352693
TRCN0000005420	chr18	21032787:21063099	+	RIOK3	NM_003831	CDS	1716.43	1611.27	1828.16	1.13461	0.182197	1.14353	0.193491	0.00693518	0.0302571
TRCN0000005419	chr18	21032787:21063099	+	RIOK3	NM_003831	CDS	2657.61	2480.65	2845.62	1.14712	0.198021	1.16581	0.22133	0.0121032	0.0410636
TRCN0000000705	chr6	3077058:3115421	+	RIPK1	NM_003804	3UTR	2272.57	2011.15	2550.33	1.2681	0.342665	1.33522	0.417074	0.0003066	0.00991009
TRCN0000006350	chr8	90769975:90803292	+	RIPK2	NM_003821	CDS	1790.84	1603.49	1989.9	1.24098	0.31148	1.24781	0.319404	0.0104412	0.0375435
TRCN0000007134	chr21	43159529:43187249	-	RIPK4	NM_020639	CDS	772.17	653.828	897.908	1.37331	0.457658	1.34064	0.422926	0.00106743	0.0134366
TRCN0000007132	chr21	43159529:43187249	-	RIPK4	NM_020639	3UTR	1209.71	1114.32	1311.06	1.17656	0.23457	1.19354	0.255246	0.00363389	0.0220676
TRCN0000000924	chr1	182542769:182558394	-	RNASEL	NM_021133	CDS	2096.43	1974.02	2226.49	1.12789	0.173631	1.12606	0.17128	0.00289522	0.0202868
TRCN0000002162	chr18	18529703:18691812	-	ROCK1	NM_005406	CDS	914.047	812.348	1022.1	1.25821	0.33137	1.28891	0.366155	0.000804251	0.013109
TRCN0000000957	chr6	117609530:117747018	-	ROS1	NM_002944	CDS	771.75	650.373	900.713	1.38492	0.4698	1.38622	0.47116	0.000261579	0.00977013
TRCN0000002617	chr18	33569792:33647373	-	RPRD1A	NM_018170	3UTR	2014.81	1804.29	2238.5	1.24065	0.311098	1.26218	0.335921	0.00349963	0.0217353
TRCN0000002615	chr18	33569792:33647373	-	RPRD1A	NM_018170	CDS	587.069	519.687	658.662	1.26742	0.341896	1.25491	0.327589	0.00946002	0.0354574
TRCN0000006353	chr6	166822854:167275771	-	RPS6KA2	NM_021135	CDS	897.092	804.603	995.362	1.23708	0.306943	1.27385	0.349196	0.00549949	0.0266637
TRCN0000001496	chr14	91337167:91526993	-	RPS6KA5	NM_004755	CDS	2240.99	2042.65	2451.73	1.20027	0.263355	1.20489	0.2689	0.000269767	0.00977013
TRCN0000001495	chr14	91337167:91526993	-	RPS6KA5	NM_004755	CDS	1218.33	1065.6	1380.61	1.29563	0.373649	1.31627	0.396451	0.00109679	0.013498
TRCN0000001494	chr14	91337167:91526993	-	RPS6KA5	NM_004755	3UTR	7917.68	7444.13	8420.81	1.1312	0.177856	1.12764	0.173305	0.0139058	0.0441869
TRCN0000003160	chr17	57970407:58027786	+	RPS6KB1	NM_003161	3UTR	2297.61	2076.16	2532.9	1.21999	0.286875	1.25326	0.325685	0.00699503	0.0303859
TRCN0000000730	chr11	67195935:67202879	+	RPS6KB2	NM_003952	CDS	2644.83	2372.97	2933.67	1.23628	0.306009	1.27999	0.356134	0.00260657	0.0192503
TRCN0000003259	chr1	213224575:213446808	+	RPS6KC1	NM_012424	CDS	953.523	819.234	1096.2	1.33808	0.420169	1.31564	0.395765	0.00141616	0.0153681
TRCN0000003262	chr1	213224575:213446808	+	RPS6KC1	NM_012424	CDS	1101.44	999.235	1210.04	1.21097	0.276158	1.24956	0.321425	0.0100863	0.0370658
TRCN0000001575	chr3	133875978:133969586	-	RYK	NM_002958	CDS	1365.08	1209.06	1530.86	1.26616	0.340457	1.28813	0.365282	0.00109686	0.013498
TRCN0000037398	chr16	28303840:28335170	+	SBK1	XM_370948	CDS	1085.89	903.927	1279.23	1.41519	0.500999	1.3987	0.484081	0.000673838	0.0120787
TRCN0000037396	chr16	28303840:28335170	+	SBK1	XM_370948	CDS	809.45	722.877	901.433	1.24701	0.318471	1.25113	0.323237	0.011025	0.038909
TRCN0000002387	chr1	169822215:169863100	-	SCYL3	NM_020423	CDS	1889.58	1652.35	2141.64	1.29612	0.374199	1.27204	0.347149	0.0149209	0.046335
TRCN0000010432	chr6	134490384:134639196	-	SGK1	NM_005627	CDS	343.176	295.595	393.73	1.33199	0.413582	1.34312	0.425593	0.00122838	0.0141476
TRCN0000009867	chr6	134490384:134639196	-	SGK1	NM_005627	3UTR	1267.32	1105.35	1439.42	1.30222	0.380978	1.30157	0.38025	0.00208994	0.0177549
TRCN0000001520	chr8	67624653:67774257	+	SGK3	NM_013257	CDS	1070.29	940.652	1208.02	1.28424	0.360917	1.32286	0.403661	0.00184688	0.0168197
TRCN0000010273	chr8	67624653:67774257	+	SGK3	NM_170709	CDS	587.777	508.565	671.94	1.32125	0.4019	1.29934	0.377781	0.0048357	0.025156
TRCN0000002413	chr17	26934982:26941211	-	SGK494	NM_144610	CDS	503.891	408.261	605.498	1.48311	0.568629	1.41613	0.501957	0.00023684	0.00977013
TRCN0000002412	chr17	26934982:26941211	-	SGK494	NM_144610	CDS	515.95	459.799	575.612	1.25188	0.324093	1.27504	0.350544	0.00412634	0.0232716
TRCN0000001366	chr21	44834398:44847002	-	SIK1	NM_173354	CDS	1253.76	1108.4	1408.22	1.2705	0.345391	1.27823	0.354147	0.00388702	0.0228027
TRCN0000001365	chr21	44834398:44847002	-	SIK1	NM_173354	CDS	2259.75	2102.14	2427.21	1.15464	0.207438	1.17197	0.22894	0.0149433	0.0463565
TRCN0000037494	chr11	111473170:111597632	+	SIK2	NM_015191	CDS	2737.62	2491.31	2999.34	1.20392	0.267743	1.2201	0.287001	0.00654126	0.0295539
TRCN0000037496	chr11	111473170:111597632	+	SIK2	NM_015191	CDS	927.209	815.955	1045.42	1.28122	0.357516	1.28181	0.358188	0.00985969	0.0365453
TRCN0000037497	chr11	111473170:111597632	+	SIK2	NM_015191	CDS	2035.35	1927.28	2150.17	1.11565	0.157884	1.14809	0.199233	0.0114599	0.039917
TRCN0000037452	chr11	116714118:116969131	-	SIK3	NM_025164	CDS	1508.71	1284.21	1747.23	1.36055	0.444192	1.36885	0.452965	0.00051801	0.0114566
TRCN0000000894	chr10	105727470:105787342	+	SLK	NM_014720	3UTR	503.774	425.361	587.087	1.38021	0.464887	1.35659	0.439982	0.00112191	0.0136537
TRCN0000037412	chr16	18816175:18937726	-	SMG1	NM_014006	CDS	1738.76	1639.49	1844.23	1.12489	0.169778	1.1455	0.195981	0.0051407	0.0256693
TRCN0000037411	chr16	18816175:18937726	-	SMG1	NM_014006	CDS	8428.46	8067.38	8812.11	1.09231	0.127386	1.11226	0.153494	0.0068422	0.0299983
TRCN0000037429	chr2	220299700:220358354	+	SPEG	NM_005876	CDS	3404.35	3048.92	3781.99	1.24043	0.310845	1.26582	0.340068	0.000181806	0.00906708
TRCN0000036965	chr17	74380690:74383941	+	SPHK1	NM_182965	CDS	758.751	704.76	816.117	1.15801	0.211643	1.20633	0.270624	0.0161317	0.0484792
TRCN0000036971	chr19	49122548:49133663	+	SPHK2	NM_020126	CDS	456.22	339.718	580.003	1.70731	0.771724	1.45155	0.53759	0.000341959	0.0101843
TRCN0000000938	chr20	62171277:62178857	-	SRMS	NM_080823	CDS	1173.44	1108.71	1242.21	1.12041	0.164021	1.15782	0.21141	0.0151558	0.0468531
TRCN0000006278	chr7	104756821:105029377	-	SRPK2	NM_003138	CDS	2061.03	1725.48	2417.54	1.40108	0.486539	1.33511	0.416959	0.00362848	0.0220676
TRCN0000006274	chr7	104756821:105029377	-	SRPK2	NM_003138	3UTR	1774	1573.16	1987.4	1.26332	0.337217	1.24916	0.32096	0.00409753	0.0231526
TRCN0000007067	chrX	153046456:153051187	+	SRPK3	NM_014370	CDS	3813.1	3520.42	4124.06	1.17147	0.228318	1.20783	0.272419	0.000106888	0.00730241
TRCN0000000696	chr2	220110192:220115059	+	STK16	NM_003691	CDS	1369.21	1256.23	1489.26	1.1855	0.245499	1.212	0.277388	0.000446838	0.0108766
TRCN0000010154	chr2	196998307:197036336	-	STK17B	NM_004226	CDS	3114.25	2735.26	3516.93	1.28578	0.362641	1.30743	0.386731	0.00110149	0.013498
TRCN0000000641	chr13	99102453:99229405	-	STK24	NM_003576	3UTR	1223.26	1143.41	1308.09	1.14403	0.194124	1.18081	0.23978	0.0128972	0.042229
TRCN0000003277	chr7	23749786:23872130	+	STK31	NM_032944	CDS	1707.68	1599.63	1822.48	1.13931	0.188162	1.17586	0.233717	0.00176502	0.0167371
TRCN0000003275	chr7	23749786:23872130	+	STK31	NM_032944	CDS	587.036	514.904	663.677	1.28893	0.366177	1.30553	0.384633	0.00708105	0.0305454
TRCN0000007127	chr5	146614579:146767418	+	STK32A	NM_145001	CDS	313.788	259.466	371.505	1.4318	0.517832	1.32734	0.408539	0.0064084	0.0291432
TRCN0000007045	chr10	134020996:134121477	-	STK32C	NM_173575	CDS	5597.14	5319.42	5892.23	1.10768	0.147545	1.09994	0.137428	0.00246302	0.0189154
TRCN0000007043	chr10	134020996:134121477	-	STK32C	NM_173575	CDS	4000.07	3780.54	4233.33	1.11977	0.163201	1.14617	0.196816	0.01014	0.0370658
TRCN0000006986	chr2	219536749:219567440	+	STK36	NM_015690	3UTR	624.459	535.068	719.437	1.34457	0.427147	1.34736	0.43013	0.00175911	0.0167338
TRCN0000007075	chr2	202316392:202345574	+	STRADB	NM_018571	CDS	3410.44	3050.83	3792.52	1.24311	0.313957	1.24933	0.321157	0.000202238	0.009211
TRCN0000007076	chr2	202316392:202345574	+	STRADB	NM_018571	CDS	5138.33	4175	6161.86	1.4759	0.561591	1.37832	0.462911	0.00204363	0.0176015
TRCN0000007072	chr2	202316392:202345574	+	STRADB	NM_018571	3UTR	2185.16	1974.33	2409.17	1.22024	0.287169	1.23201	0.301012	0.0103993	0.0375123
TRCN0000007074	chr2	202316392:202345574	+	STRADB	NM_018571	CDS	4764.25	4245.59	5315.34	1.25197	0.324198	1.25341	0.325863	0.0106433	0.0380457
TRCN0000037500	chr9	32629452:32635667	-	TAF1L	NM_153809	CDS	1603.78	1421.84	1797.09	1.26391	0.337897	1.26556	0.339774	0.0105935	0.0380002
TRCN0000037499	chr9	32629452:32635667	-	TAF1L	NM_153809	CDS	1950.35	1812.58	2096.74	1.15677	0.210102	1.17194	0.228898	0.0132247	0.0428587
TRCN0000037528	chr17	27717943:27878921	+	TAOK1	NM_020791	CDS	3330.48	3068.61	3608.73	1.17601	0.233905	1.17883	0.237356	0.000133394	0.00802518
TRCN0000001525	chr12	118587606:118810750	-	TAOK3	NM_016281	3UTR	1664.33	1556.91	1778.46	1.1423	0.191947	1.17094	0.227667	0.00160374	0.0160694
TRCN0000007080	chr4	106965474:107237861	-	TBCK	NM_033115	CDS	2169.61	1929.17	2425.08	1.25706	0.330055	1.3021	0.380839	0.00148427	0.0157265
TRCN0000009983	chr4	48137800:48271814	-	TEC	NM_003215	CDS	3732.9	3340.28	4150.05	1.24243	0.313161	1.28326	0.359818	0.000840381	0.013109
TRCN0000009993	chr4	48137800:48271814	-	TEC	NM_003215	CDS	3039.06	2789.43	3304.29	1.18458	0.244371	1.21375	0.27947	0.00577979	0.0274038
TRCN0000002251	chr9	35605281:35610038	+	TESK1	NM_006285	CDS	302.58	269.989	337.208	1.24897	0.320738	1.28203	0.358425	0.00749992	0.0312941
TRCN0000002247	chr9	35605281:35610038	+	TESK1	NM_006285	CDS	1242.38	1142.7	1348.29	1.17991	0.238675	1.1848	0.244649	0.00934888	0.0352358
TRCN0000001434	chr1	45809555:45956840	-	TESK2	NM_007170	CDS	997.581	876.362	1126.38	1.28529	0.36209	1.32052	0.401101	0.00103201	0.0132573
TRCN0000037472	chr17	56634038:56769416	-	TEX14	NM_031272	CDS	2706.14	2448.41	2979.98	1.21711	0.283458	1.21667	0.282933	0.00180441	0.0168197
TRCN0000039773	chr9	101867412:101916473	+	TGFBR1	NM_004612	3UTR	1415.76	1280.31	1559.67	1.2182	0.284751	1.24436	0.315398	0.00133004	0.0149741
TRCN0000040012	chr3	30647994:30735633	+	TGFBR2	NM_003242	CDS	1975.81	1784.08	2179.51	1.22164	0.288825	1.23863	0.308743	0.0156411	0.0474935
TRCN0000010127	chr17	76170160:76183285	-	TK1	NM_003258	CDS	2526.76	2385.54	2676.8	1.12209	0.16619	1.12815	0.173963	0.00981739	0.0364334
TRCN0000007059	chr2	171847333:172087824	-	TLK1	NM_012290	CDS	8459.48	8070.4	8872.88	1.09944	0.136762	1.09831	0.135286	0.00687127	0.0300656
TRCN0000007058	chr2	171847333:172087824	-	TLK1	NM_012290	CDS	8099.22	7752.16	8467.98	1.09234	0.12742	1.10942	0.149809	0.0113942	0.0398267
TRCN0000000741	chr17	7284293:7293092	+	TNK1	NM_003985	CDS	2465.84	2303.87	2637.94	1.145	0.195354	1.1692	0.225528	0.00348688	0.0217353
TRCN0000002193	chr1	74701071:75010116	+	TNNI3K	NM_015978	CDS	679.569	600.716	763.352	1.27074	0.345665	1.28151	0.357845	0.00824989	0.0331983
TRCN0000002192	chr1	74701071:75010116	+	TNNI3K	NM_015978	CDS	511.528	455.88	570.655	1.25176	0.323964	1.24672	0.318135	0.00856193	0.0334984
TRCN0000002195	chr1	74701071:75010116	+	TNNI3K	NM_015978	CDS	2609.02	2410.8	2819.62	1.16958	0.225989	1.18829	0.248891	0.0103127	0.0373871
TRCN0000037520	chr20	45313004:45318276	-	TP53RK	NM_033550	CDS	7492.11	7021.31	7992.33	1.13829	0.186874	1.14244	0.192117	0.00477749	0.0251069
TRCN0000037523	chr20	45313004:45318276	-	TP53RK	NM_033550	CDS	3687.79	3321.01	4077.49	1.22779	0.296063	1.2323	0.301355	0.00855889	0.0334984
TRCN0000038004	chr7	144149034:144533146	-	TPK1	NM_022445	CDS	717.531	584.155	859.243	1.47092	0.556715	1.38368	0.468508	0.0011735	0.0139428
TRCN0000038006	chr7	144149034:144533146	-	TPK1	NM_022445	CDS	1392.3	1261.9	1530.85	1.21314	0.278741	1.24835	0.320027	0.00484541	0.025156
TRCN0000001537	chr8	126442563:126450647	+	TRIB1	NM_025195	CDS	1229.05	1046.05	1423.49	1.36083	0.444483	1.32272	0.403508	0.00257962	0.0191465
TRCN0000007144	chr2	12856998:12882858	+	TRIB2	NM_021643	CDS	705.287	616.505	799.618	1.29702	0.375199	1.30644	0.385644	0.00156075	0.0159836
TRCN0000017999	chr19	59055836:59062082	+	TRIM28	NM_005762	CDS	1247.14	1116.05	1386.43	1.24227	0.312979	1.24845	0.320142	0.00833634	0.0333256
TRCN0000005362	chr7	98476113:98610866	+	TRRAP	NM_003496	CDS	661.469	577.435	750.755	1.30015	0.378683	1.29026	0.367665	0.00860539	0.0335696
TRCN0000037467	chr5	112768251:112770728	-	TSSK1B	NM_032028	CDS	4916.74	4536.47	5320.77	1.17289	0.230063	1.17063	0.227282	9.74641e-06	0.00553144
TRCN0000003221	chr22	19118321:19120136	+	TSSK2	NM_053006	CDS	4973.13	4747.2	5213.17	1.09816	0.135083	1.1048	0.143787	0.0104196	0.0375123
TRCN0000002211	chr1	32827862:32829924	+	TSSK3	NM_052841	CDS	864.313	768.686	965.916	1.25658	0.329504	1.24114	0.31166	0.000827491	0.013109
TRCN0000002208	chr1	32827862:32829924	+	TSSK3	NM_052841	CDS	1060.42	948.259	1179.6	1.24396	0.314944	1.243	0.313826	0.000880467	0.0131476
TRCN0000037536	chr6	43211222:43255997	+	TTBK1	XM_166453	CDS	4795.47	4364.62	5253.24	1.2036	0.267351	1.21376	0.279486	0.00397478	0.0229358
TRCN0000037538	chr6	43211222:43255997	+	TTBK1	XM_166453	CDS	1149.68	1028.21	1278.74	1.24366	0.314588	1.24608	0.317392	0.00752892	0.0313028
TRCN0000006357	chr6	80714322:80752244	+	TTK	NM_003318	CDS	652.944	591.172	718.577	1.21551	0.281566	1.2234	0.290898	0.00845054	0.0333666
TRCN0000037482	chr2	179390717:179672150	-	TTN	NM_003319	CDS	3702.06	3472.91	3945.53	1.13609	0.184074	1.161	0.21537	0.000201225	0.009211
TRCN0000037483	chr2	179390717:179672150	-	TTN	NM_003319	CDS	2719.02	2361.35	3099.05	1.31241	0.392216	1.25779	0.330893	0.0158434	0.0478646
TRCN0000021420	chr3	52262626:52273183	-	TWF2	NM_007284	CDS	1134.79	1044.95	1230.25	1.17732	0.235508	1.18506	0.244961	0.0125349	0.04182
TRCN0000003120	chr19	10461204:10491248	-	TYK2	NM_003331	CDS	1160.9	1015.73	1315.15	1.29478	0.372709	1.33658	0.418544	5.59288e-05	0.00646623
TRCN0000003123	chr19	10461204:10491248	-	TYK2	NM_003331	3UTR	1782.01	1659.19	1912.49	1.15266	0.204972	1.16441	0.219593	0.000368714	0.0104839
TRCN0000003121	chr19	10461204:10491248	-	TYK2	NM_003331	CDS	1745.53	1568.15	1934	1.2333	0.302522	1.28072	0.356958	0.00140943	0.0153681
TRCN0000037851	chr1	165796732:165880855	+	UCK2	NM_012474	CDS	1100.94	993.725	1214.85	1.22252	0.289857	1.22642	0.294449	0.00717629	0.0305609
TRCN0000037574	chr20	62571182:62587800	-	UCKL1	NM_017859	CDS	2314.3	2158.48	2479.85	1.14889	0.200236	1.1681	0.224164	0.00324367	0.0212365
TRCN0000037577	chr20	62571182:62587800	-	UCKL1	NM_017859	CDS	6859.68	6361.17	7389.34	1.16163	0.216153	1.19207	0.253471	0.0115212	0.0399916
TRCN0000037839	chr2	64068098:64118696	+	UGP2	NM_006759	CDS	1607.76	1404.61	1823.61	1.2983	0.376629	1.25965	0.333028	0.000467662	0.0110692
TRCN0000003280	chr1	162466964:162499419	+	UHMK1	NM_144624	CDS	373.369	293.579	458.146	1.56055	0.642059	1.35912	0.442668	0.00447855	0.0243294
TRCN0000000835	chr12	132379279:132407707	+	ULK1	NM_003565	3UTR	1840.07	1709.63	1978.65	1.15736	0.210834	1.1988	0.261594	0.00884974	0.0341817
TRCN0000010206	chr2	58134786:58387055	+	VRK2	NM_006296	CDS	3655.78	3419.82	3906.49	1.14231	0.191954	1.1646	0.219836	0.00315397	0.0211646
TRCN0000001702	chr11	9595228:9611313	+	WEE1	NM_003390	3UTR	2714.98	2495.39	2948.3	1.1815	0.240621	1.19264	0.254159	0.00194518	0.0170472
TRCN0000000921	chr12	862089:1020618	+	WNK1	NM_018979	CDS	5896.8	5580.63	6232.73	1.11685	0.159435	1.11893	0.162116	0.000942545	0.0132161
TRCN0000007022	chr17	40932649:40949084	+	WNK4	NM_032387	CDS	2226.02	2039.35	2424.36	1.18879	0.249495	1.22376	0.291326	0.00480844	0.025156
TRCN0000007019	chr17	40932649:40949084	+	WNK4	NM_032387	CDS	874.289	808.343	944.357	1.16826	0.224363	1.18422	0.243935	0.0142305	0.0448394
TRCN0000001607	chr18	721592:812327	-	YES1	NM_005433	3UTR	5238.99	4956.26	5539.39	1.11766	0.160475	1.13647	0.184563	0.00264589	0.0192503
TRCN0000001608	chr18	721592:812327	-	YES1	NM_005433	CDS	679.766	580.686	785.038	1.35191	0.435004	1.32736	0.408557	0.00342306	0.0217353
TRCN0000001610	chr18	721592:812327	-	YES1	NM_005433	CDS	9156.19	8742.87	9595.33	1.0975	0.134225	1.13711	0.185376	0.014165	0.0446799

## Sheet: Dn adjp 0.05
TRCN	Chr	Genomic Loc	Strand	Gene	RefSeq	shRNA Loc	baseMean	baseMeanD21	baseMeanT21	foldChange	log2FoldChange	foldChange_adj	log2FoldChange_adj	pval	padj
TRCN0000001946	chr2	69685127:69870977	-	AAK1	NM_014911	CDS	1348.22	1483.74	1204.23	0.811617	-0.301129	0.823065	-0.280922	0.0117892	0.0405473
TRCN0000039902	chr9	133589268:133763062	+	ABL1	NM_005157	CDS	3637.4	3916.38	3340.98	0.853079	-0.229248	0.864823	-0.209522	0.00901327	0.0345585
TRCN0000039899	chr9	133589268:133763062	+	ABL1	NM_005157	CDS	2449.23	2570.3	2320.6	0.902849	-0.147443	0.903853	-0.145839	0.0127519	0.0421564
TRCN0000001812	chr12	52345451:52390863	+	ACVR1B	NM_020328	CDS	6174.72	6581.41	5742.61	0.872551	-0.196688	0.879303	-0.185568	0.00541307	0.0264151
TRCN0000010151	chr12	52345451:52390863	+	ACVR1B	NM_004302	CDS	18767.5	20010.5	17446.8	0.871883	-0.197793	0.868544	-0.203329	0.0130706	0.0425297
TRCN0000000553	chr2	148602086:148688396	+	ACVR2A	NM_001616	CDS	1861.78	2116.89	1590.73	0.751444	-0.412262	0.775778	-0.366284	0.000653688	0.0120787
TRCN0000000446	chr3	38495790:38534633	+	ACVR2B	NM_001106	CDS	2721.71	2946.95	2482.4	0.842362	-0.247487	0.828897	-0.270735	0.0109531	0.0388726
TRCN0000000354	chr12	52301202:52317145	+	ACVRL1	NM_000020	CDS	1276.07	1424.77	1118.07	0.784733	-0.349726	0.796293	-0.328629	0.0019076	0.0168654
TRCN0000021395	chr7	140372953:140394908	+	ADCK2	NM_052853	CDS	2836.51	3088.79	2568.46	0.831543	-0.266137	0.841835	-0.24839	0.00117049	0.0139428
TRCN0000021397	chr7	140372953:140394908	+	ADCK2	NM_052853	CDS	1344.59	1450.76	1231.79	0.849069	-0.236046	0.856354	-0.223721	0.0166239	0.0492482
TRCN0000021480	chr8	145597704:145618453	+	ADCK5	NM_174922	CDS	2187.59	2398.54	1963.45	0.818604	-0.288762	0.832571	-0.264355	0.00899672	0.0345391
TRCN0000002036	chr22	25960861:26125258	+	ADRBK2	NM_005160	CDS	1173.17	1291.02	1047.96	0.811731	-0.300927	0.836606	-0.25738	0.0150051	0.0465002
TRCN0000006018	chr9	130628759:130640022	-	AK1	NM_000476	CDS	2262.09	2470.04	2041.15	0.826363	-0.275153	0.828033	-0.272241	6.95932e-05	0.00686112
TRCN0000037558	chr1	65613232:65697828	+	AK4	NM_013410	CDS	3605.63	4098.73	3081.7	0.751866	-0.411453	0.759177	-0.397493	1.08611e-07	0.000326484
TRCN0000000562	chr19	40736224:40791302	-	AKT2	NM_001626	CDS	2249.88	2462.22	2024.28	0.822137	-0.28255	0.845232	-0.242581	0.000495777	0.0113451
TRCN0000000784	chr2	29415640:30144477	-	ALK	NM_004304	3UTR	9753.69	10698.5	8749.89	0.817865	-0.290066	0.822414	-0.282064	6.96957e-05	0.00686112
TRCN0000000787	chr2	29415640:30144477	-	ALK	NM_004304	CDS	14529.9	15354.9	13653.3	0.889178	-0.169456	0.880241	-0.18403	0.0132312	0.0428587
TRCN0000021528	chr15	85359911:85416713	+	ALPK3	NM_020778	CDS	3771.51	4112.09	3409.64	0.829175	-0.270252	0.835885	-0.258624	0.00934637	0.0352358
TRCN0000001958	chr12	53817639:53825318	+	AMHR2	NM_020547	CDS	1413.1	1551.15	1266.43	0.816445	-0.292573	0.81903	-0.288012	0.00508602	0.0256304
TRCN0000039949	chr11	108093559:108239826	+	ATM	NM_000051	CDS	6409.28	6842.5	5948.99	0.869418	-0.201879	0.868661	-0.203134	0.000393811	0.0105579
TRCN0000038655	chr11	108093559:108239826	+	ATM	NM_000051	CDS	2997.39	3262.74	2715.45	0.83226	-0.264894	0.835672	-0.258992	0.0119669	0.040971
TRCN0000038657	chr11	108093559:108239826	+	ATM	NM_000051	CDS	2839.15	3044.51	2620.96	0.860881	-0.216114	0.851564	-0.231812	0.0129384	0.042229
TRCN0000000778	chr17	8108049:8113944	-	AURKB	NM_004217	CDS	4044.37	4457.8	3605.1	0.808717	-0.306294	0.825519	-0.276627	0.00227213	0.0182414
TRCN0000000576	chr19	41725104:41767672	+	AXL	NM_001699	CDS	4385.05	4553.11	4206.5	0.923874	-0.114232	0.921531	-0.117895	0.00252448	0.0189741
TRCN0000000574	chr19	41725104:41767672	+	AXL	NM_001699	CDS	3527.53	3711.98	3331.55	0.897514	-0.155994	0.897018	-0.156791	0.00527184	0.0261073
TRCN0000000793	chr22	23522552:23660224	+	BCR	NM_004327	CDS	17543.3	19037.7	15955.5	0.838102	-0.254802	0.839188	-0.252934	7.95182e-05	0.00686112
TRCN0000010075	chr8	11351521:11422108	+	BLK	NM_001715	CDS	5670.53	6284	5018.72	0.79865	-0.324364	0.821467	-0.283725	0.000429006	0.0107034
TRCN0000010086	chr8	11351521:11422108	+	BLK	NM_001715	CDS	9335.9	10085.7	8539.21	0.846663	-0.24014	0.855762	-0.224719	0.00324976	0.0212365
TRCN0000000914	chr4	79697532:79833341	+	BMP2K	NM_017593	CDS	3021.41	3216.56	2814.06	0.874868	-0.192863	0.884957	-0.17632	0.00107725	0.0134366
TRCN0000000454	chr4	95679128:96079601	+	BMPR1B	NM_001203	CDS	1823.31	1924.14	1716.18	0.891918	-0.165016	0.88484	-0.176512	0.0152698	0.0469817
TRCN0000006360	chrX	15518900:15574652	+	BMX	NM_001721	CDS	12095.3	13381.9	10728.2	0.801694	-0.318876	0.804918	-0.313086	0.000151613	0.00836981
TRCN0000006362	chrX	15518900:15574652	+	BMX	NM_001721	CDS	4964.18	5331.56	4573.84	0.85788	-0.221152	0.84415	-0.244428	0.000263927	0.00977013
TRCN0000006289	chr7	140433813:140624564	-	BRAF	NM_004333	CDS	7498.52	7895.8	7076.41	0.896225	-0.158068	0.894449	-0.160929	0.000542047	0.0114566
TRCN0000006293	chr7	140433813:140624564	-	BRAF	NM_004333	CDS	6990.35	7579.32	6364.57	0.839728	-0.252005	0.84937	-0.235535	0.00576897	0.0274038
TRCN0000006290	chr7	140433813:140624564	-	BRAF	NM_004333	CDS	4396.29	4709.03	4063.99	0.86302	-0.212533	0.864723	-0.209689	0.0126962	0.042093
TRCN0000021374	chr9	136895446:136933141	-	BRD3	NM_007371	3UTR	1716.96	1859.46	1565.56	0.841947	-0.248199	0.864746	-0.209652	0.0168757	0.0498313
TRCN0000021424	chr19	15348301:15391262	-	BRD4	NM_058243	3UTR	9126.56	9778.73	8433.63	0.862446	-0.213494	0.868944	-0.202664	0.0132697	0.0428912
TRCN0000000736	chr11	1411129:1483919	+	BRSK2	NM_003957	CDS	2528.64	2694.7	2352.2	0.872899	-0.196113	0.863977	-0.210936	0.00312845	0.0211646
TRCN0000000739	chr11	1411129:1483919	+	BRSK2	NM_003957	CDS	3109.92	3372.96	2830.45	0.83916	-0.252982	0.860996	-0.215922	0.00638869	0.0290976
TRCN0000000359	chrX	100604435:100645784	-	BTK	NM_000061	CDS	2072.41	2273.98	1858.24	0.817175	-0.291283	0.830514	-0.267923	0.00306032	0.0209075
TRCN0000000802	chr2	111395275:111435684	-	BUB1	NM_004336	CDS	3737.63	4049.33	3406.46	0.841241	-0.249409	0.83461	-0.260825	0.000550338	0.0114883
TRCN0000000461	chr15	40453210:40513337	+	BUB1B	NM_001211	3UTR	3967.52	4358.08	3552.54	0.815162	-0.294841	0.824956	-0.277612	0.00469588	0.0249837
TRCN0000052580	chr2	47387221:47403740	-	CALM2	NM_001743	CDS	2760.33	3013.29	2491.56	0.826855	-0.274294	0.842217	-0.247737	0.00914706	0.0347506
TRCN0000037900	chr19	47104512:47114039	+	CALM3	NM_005184	CDS	3772.56	4181.74	3337.81	0.798187	-0.325201	0.817917	-0.289974	0.00718925	0.0305609
TRCN0000000679	chr3	9799029:9811668	-	CAMK1	NM_003656	CDS	1962.54	2124.28	1790.7	0.842967	-0.246451	0.85653	-0.223425	0.00157204	0.0159836
TRCN0000010002	chr3	9799029:9811668	-	CAMK1	NM_003656	CDS	13609	14832.7	12308.8	0.829844	-0.269088	0.825818	-0.276105	0.00252483	0.0189741
TRCN0000001752	chr10	12391583:12871733	+	CAMK1D	NM_020397	CDS	6964.94	7360.53	6544.61	0.889149	-0.169503	0.876939	-0.189452	0.00521085	0.0258911
TRCN0000001753	chr10	12391583:12871733	+	CAMK1D	NM_020397	CDS	4967.46	5345.76	4565.52	0.854045	-0.227616	0.865797	-0.207898	0.00884278	0.0341817
TRCN0000000469	chr7	44256749:44365230	-	CAMK2B	NM_001220	CDS	2878.57	3183.37	2554.71	0.802518	-0.317394	0.821671	-0.283368	0.00377116	0.0223592
TRCN0000000472	chr4	114372188:114683083	-	CAMK2D	NM_001221	CDS	2740.9	2973.33	2493.94	0.83877	-0.253652	0.845852	-0.241523	0.006322	0.0288813
TRCN0000000479	chr10	75572259:75634349	-	CAMK2G	NM_001222	CDS	2399.8	2577.78	2210.69	0.857597	-0.221629	0.857265	-0.222187	0.00220489	0.0179618
TRCN0000000581	chr5	110559947:110820748	+	CAMK4	NM_001744	CDS	3439.55	3712.41	3149.64	0.848409	-0.237169	0.858095	-0.220791	0.00473736	0.0250272
TRCN0000010254	chr3	49895422:49907369	-	CAMKV	NM_024046	CDS	1256.86	1435.65	1066.9	0.743145	-0.428283	0.790601	-0.338978	0.000662625	0.0120787
TRCN0000010253	chr3	49895422:49907369	-	CAMKV	NM_024046	CDS	1728.55	1908.38	1537.48	0.805649	-0.311777	0.822345	-0.282184	0.0023371	0.0186586
TRCN0000006994	NA	NA:NA	NA	CDC2L2	NM_024011	CDS	1845.71	2055.92	1622.36	0.789117	-0.341689	0.826475	-0.274956	0.015748	0.0476722
TRCN0000000662	chr1	227177566:227505826	-	CDC42BPA	NM_003607	CDS	10622.1	11385	9811.56	0.861795	-0.214583	0.860455	-0.216829	0.00250443	0.0189154
TRCN0000000659	chr1	227177566:227505826	-	CDC42BPA	NM_003607	3UTR	5704.56	6291.92	5080.49	0.807462	-0.308533	0.829337	-0.269969	0.00327947	0.0212863
TRCN0000003169	chr1	91966404:91991321	+	CDC7	NM_003503	CDS	4885.47	5155.35	4598.73	0.892032	-0.164833	0.886895	-0.173165	0.00172486	0.0164601
TRCN0000003168	chr1	91966404:91991321	+	CDC7	NM_003503	CDS	3330.29	3745.44	2889.2	0.771391	-0.374466	0.800165	-0.321631	0.00402998	0.0229968
TRCN0000000688	chr16	89753076:89762772	+	CDK10	NM_003674	CDS	10851.7	11432.5	10234.5	0.895218	-0.159689	0.892228	-0.164516	0.000586979	0.0116852
TRCN0000000689	chr16	89753076:89762772	+	CDK10	NM_003674	CDS	2365.85	2602.25	2114.67	0.81263	-0.29933	0.825112	-0.277338	0.00577129	0.0274038
TRCN0000006206	chr1	1570603:1655859	-	CDK11B	NM_001787	CDS	4418.48	4816.14	3995.98	0.829706	-0.269327	0.837882	-0.255181	0.00387305	0.0228027
TRCN0000006208	chr1	1570603:1655859	-	CDK11B	NM_001787	CDS	6352.81	6762.07	5917.98	0.875174	-0.192359	0.862005	-0.214232	0.0120726	0.041006
TRCN0000001795	chr17	37617764:37690818	+	CDK12	NM_016507	CDS	5984.02	6363.56	5580.75	0.876986	-0.189375	0.883175	-0.179228	0.000303372	0.00991009
TRCN0000001797	chr17	37617764:37690818	+	CDK12	NM_016507	CDS	3287.96	3471.92	3092.5	0.890718	-0.166959	0.88379	-0.178225	0.00556509	0.0269383
TRCN0000000700	chr7	39989959:40136733	+	CDK13	NM_003718	3UTR	4332.09	4559.37	4090.6	0.897185	-0.156523	0.880568	-0.183493	0.00794243	0.0323071
TRCN0000002367	chr7	90225676:90839905	+	CDK14	NM_012395	CDS	5277.7	5716.6	4811.37	0.841649	-0.24871	0.840111	-0.251348	6.16337e-05	0.00686112
TRCN0000002370	chr7	90225676:90839905	+	CDK14	NM_012395	3UTR	2645.49	2805.14	2475.86	0.882614	-0.180145	0.885577	-0.17531	0.0169576	0.049926
TRCN0000002099	chr2	202671152:202760273	+	CDK15	NM_139158	3UTR	3624.15	3783.93	3454.37	0.912906	-0.131461	0.900117	-0.151815	0.00755093	0.0313359
TRCN0000006337	chr1	205473684:205501921	+	CDK18	NM_002596	CDS	15913.3	17152.7	14596.3	0.850962	-0.232834	0.850809	-0.233093	0.00348892	0.0217353
TRCN0000006335	chr1	205473684:205501921	+	CDK18	NM_002596	CDS	3788.13	4047.74	3512.29	0.867716	-0.204705	0.856324	-0.223772	0.00569513	0.0273039
TRCN0000006336	chr1	205473684:205501921	+	CDK18	NM_002596	CDS	3967.84	4270.86	3645.89	0.853666	-0.228256	0.855978	-0.224355	0.0144872	0.0453631
TRCN0000003142	chr6	110931181:111136412	-	CDK19	NM_015076	CDS	1874.12	2064.37	1671.97	0.809915	-0.304157	0.825018	-0.277503	0.00492891	0.0252363
TRCN0000000365	chr12	58141510:58146230	-	CDK4	NM_000075	CDS	1875.67	2043.21	1697.66	0.83088	-0.267289	0.8413	-0.249307	0.0148179	0.0461105
TRCN0000021464	chr7	150750899:150755052	-	CDK5	NM_004935	3UTR	5528.04	6078.2	4943.49	0.813315	-0.298114	0.827309	-0.273501	0.000671808	0.0120787
TRCN0000021465	chr7	150750899:150755052	-	CDK5	NM_004935	CDS	2822.62	3007.78	2625.88	0.873027	-0.195902	0.874052	-0.194209	0.0107837	0.0383618
TRCN0000000497	chr9	130548305:130553052	+	CDK9	NM_001261	CDS	2645.16	2962.98	2307.47	0.778768	-0.360735	0.79277	-0.335026	1.56493e-05	0.00553144
TRCN0000000496	chr9	130548305:130553052	+	CDK9	NM_001261	CDS	1897.6	2108.01	1674.04	0.79413	-0.332552	0.810712	-0.302738	0.00207065	0.0177332
TRCN0000000495	chr9	130548305:130553052	+	CDK9	NM_001261	CDS	1207.79	1307.3	1102.06	0.843003	-0.24639	0.852267	-0.230622	0.0140823	0.0445595
TRCN0000002376	chr5	133634115:133702765	-	CDKL3	NM_016508	CDS	7878.44	8351.81	7375.49	0.883101	-0.17935	0.883312	-0.179005	0.00490354	0.0252363
TRCN0000037687	chr22	47080307:47134152	-	CERK	NM_182661	CDS	4741.07	5108.56	4350.61	0.85163	-0.231702	0.86392	-0.21103	0.0132057	0.0428587
TRCN0000052557	chr22	51017387:51021428	-	CHKB	NM_005198	CDS	3159.15	3341.65	2965.25	0.88736	-0.172409	0.889299	-0.16926	0.00785729	0.0322224
TRCN0000006315	chr12	120123595:120315095	-	CIT	NM_007174	CDS	5304.04	5627.38	4960.48	0.88149	-0.181984	0.877088	-0.189207	0.0025014	0.0189154
TRCN0000010088	chr19	45809671:45826235	-	CKM	NM_001824	CDS	5603.19	6106.28	5068.65	0.830072	-0.268692	0.849918	-0.234604	0.00521094	0.0258911
TRCN0000010091	chr19	45809671:45826235	-	CKM	NM_001824	CDS	7747.45	8383.88	7071.24	0.843434	-0.245653	0.854639	-0.226614	0.0084582	0.0333666
TRCN0000006058	chr15	43885252:43891604	+	CKMT1B	NM_020990	CDS	2412.78	2594.19	2220.03	0.855771	-0.224704	0.866958	-0.205967	0.00338034	0.0215739
TRCN0000000752	chr1	155232659:155243281	-	CLK2	NM_003993	CDS	5535.84	6073.5	4964.58	0.817416	-0.290858	0.84142	-0.249103	0.0133868	0.0431303
TRCN0000000745	chr15	74900713:74922542	+	CLK3	NM_003992	CDS	2338.83	2477.45	2191.56	0.884601	-0.176901	0.883743	-0.178302	0.00564027	0.0271302
TRCN0000000747	chr15	74900713:74922542	+	CLK3	NM_003992	CDS	2716.75	2862.94	2561.43	0.894684	-0.16055	0.89677	-0.157191	0.0164332	0.0489577
TRCN0000001352	chr5	178029665:178054054	-	CLK4	NM_020666	CDS	2088.81	2320.54	1842.6	0.794039	-0.332719	0.806685	-0.309923	0.00361126	0.0220639
TRCN0000001353	chr5	178029665:178054054	-	CLK4	NM_020666	CDS	2281.13	2510.28	2037.65	0.811724	-0.300939	0.827778	-0.272684	0.00364989	0.0221008
TRCN0000006444	chr1	47799469:47844511	+	CMPK1	NM_016308	CDS	11817.5	12350.7	11250.9	0.910956	-0.134547	0.902668	-0.147733	3.40523e-05	0.00602125
TRCN0000006213	chr5	74666928:74807806	-	COL4A3BP	NM_005713	CDS	1468.87	1560.52	1371.49	0.878869	-0.18628	0.87215	-0.197351	0.0154413	0.0472675
TRCN0000007024	chr13	37677397:37679801	-	CSNK1A1L	NM_145203	3UTR	9177.73	9832.82	8481.69	0.86259	-0.213254	0.866062	-0.207457	0.00152243	0.0157265
TRCN0000000599	chr17	80200537:80231618	-	CSNK1D	NM_001893	CDS	10791.5	11713.3	9812.1	0.837686	-0.255518	0.837637	-0.255603	0.000613113	0.0118142
TRCN0000000600	chr17	80200537:80231618	-	CSNK1D	NM_001893	CDS	7412.6	7932.36	6860.37	0.864858	-0.209464	0.858708	-0.219761	0.0129192	0.042229
TRCN0000010606	chr15	64457716:64648442	-	CSNK1G1	NM_022048	3UTR	7789.27	8375.34	7166.57	0.855675	-0.224865	0.84861	-0.236826	0.00992063	0.0366357
TRCN0000038671	chr19	1941161:1981336	+	CSNK1G2	NM_001319	CDS	1139.14	1241.42	1030.46	0.83006	-0.268712	0.847067	-0.239452	0.00400377	0.0229358
TRCN0000038670	chr19	1941161:1981336	+	CSNK1G2	NM_001319	CDS	1875.83	2025.22	1717.11	0.847865	-0.238093	0.850808	-0.233094	0.0117211	0.0404985
TRCN0000000809	chr5	122847793:122952738	+	CSNK1G3	NM_004384	CDS	7423.25	8210.46	6586.83	0.802249	-0.317879	0.820484	-0.285453	0.00370654	0.0221647
TRCN0000000612	chr16	58191812:58231782	-	CSNK2A2	NM_001896	CDS	6138.74	6564.8	5686.06	0.866143	-0.207322	0.855997	-0.224323	0.000675057	0.0120787
TRCN0000078618	chr11	61100654:61116231	+	DAK	NM_015533	3UTR	818.7	869.106	765.145	0.880381	-0.183799	0.876428	-0.190293	0.0165693	0.0492166
TRCN0000000982	chr9	90112143:90323549	+	DAPK1	NM_004938	3UTR	3893.76	4109.86	3664.14	0.89155	-0.165613	0.889136	-0.169524	0.00950775	0.0355919
TRCN0000037957	chr7	87505544:87538856	+	DBF4	NM_006716	CDS	1547.48	1675.97	1410.97	0.841882	-0.248309	0.852957	-0.229455	0.00826169	0.0332014
TRCN0000078716	chr17	43100706:43138477	-	DCAKD	NM_024819	CDS	1897.65	2086.64	1696.86	0.8132	-0.298318	0.816381	-0.292685	0.000132887	0.00802518
TRCN0000078715	chr17	43100706:43138477	-	DCAKD	NM_024819	CDS	2337.44	2577.29	2082.6	0.808061	-0.307463	0.84036	-0.250921	0.0111819	0.0393339
TRCN0000002144	chr13	36342789:36705514	-	DCLK1	NM_004734	CDS	1697.54	1946.91	1432.57	0.735818	-0.442578	0.740742	-0.432957	8.49189e-05	0.00689909
TRCN0000000616	chr6	30851861:30867933	+	DDR1	NM_001954	3UTR	547.025	627.499	461.52	0.735492	-0.443219	0.803217	-0.316139	0.0164033	0.0489577
TRCN0000006079	chr12	56324946:56347807	+	DGKA	NM_001345	CDS	1967.57	2219.39	1700.01	0.765979	-0.384624	0.787801	-0.344097	2.72768e-05	0.00602125
TRCN0000000768	chr7	14184674:14881075	-	DGKB	NM_004080	CDS	2075.94	2304.11	1833.5	0.795748	-0.329616	0.827547	-0.273088	0.00508137	0.0256304
TRCN0000000765	chr7	14184674:14881075	-	DGKB	NM_004080	CDS	998.015	1095.49	894.451	0.816488	-0.292497	0.822863	-0.281276	0.00585979	0.0276849
TRCN0000006085	chr17	54911460:54946036	+	DGKE	NM_003647	CDS	1939.36	2035.02	1837.72	0.903049	-0.147124	0.895248	-0.15964	0.0107045	0.0381706
TRCN0000001359	chr13	42614172:42803891	+	DGKH	NM_152910	CDS	1632.79	1771.64	1485.27	0.838361	-0.254357	0.855394	-0.225339	0.013567	0.0435711
TRCN0000006092	chr4	952672:967348	-	DGKQ	NM_001347	3UTR	2613.87	2903.35	2306.3	0.79436	-0.332135	0.820904	-0.284714	0.00248539	0.0189154
TRCN0000000816	chr19	46272967:46285815	-	DMPK	NM_004409	CDS	4915.56	5501.02	4293.51	0.780493	-0.357542	0.795239	-0.330539	0.000849315	0.013109
TRCN0000002139	chr19	40315990:40324841	-	DYRK1B	NM_004714	CDS	1993.29	2148.97	1827.88	0.850582	-0.233478	0.852086	-0.230929	0.00496443	0.0252363
TRCN0000002142	chr19	40315990:40324841	-	DYRK1B	NM_004714	CDS	5199.89	5426.92	4958.66	0.913716	-0.130182	0.91389	-0.129907	0.0152316	0.0469121
TRCN0000000646	chr1	206808881:206822542	+	DYRK3	NM_003582	3UTR	2654.06	2853.3	2442.38	0.855984	-0.224344	0.857783	-0.221315	0.00145994	0.0157059
TRCN0000000712	chr12	4699238:4723054	+	DYRK4	NM_003845	CDS	2568.62	2786.01	2337.65	0.839068	-0.25314	0.839552	-0.252308	7.13135e-05	0.00686112
TRCN0000039633	chr7	55086725:55275031	+	EGFR	NM_005228	3UTR	3112.39	3434.29	2770.38	0.806682	-0.309929	0.817228	-0.291189	0.00098928	0.0132573
TRCN0000039636	chr7	55086725:55275031	+	EGFR	NM_005228	CDS	2782.45	3048.44	2499.84	0.82004	-0.286234	0.828001	-0.272296	0.0126159	0.0419508
TRCN0000001399	chr2	88856259:88927094	-	EIF2AK3	NM_004836	3UTR	3282.26	3469.06	3083.78	0.888939	-0.169843	0.892946	-0.163355	0.0020968	0.0177549
TRCN0000006401	chr7	143088205:143105985	-	EPHA1	NM_005232	CDS	16624.1	17129.8	16086.7	0.939107	-0.090638	0.935908	-0.095562	0.0154011	0.0472404
TRCN0000006405	chr1	16450832:16482582	-	EPHA2	NM_004431	CDS	10213.2	10962.6	9416.99	0.85901	-0.219253	0.854092	-0.227537	0.000893118	0.0131476
TRCN0000006404	chr1	16450832:16482582	-	EPHA2	NM_004431	CDS	18360.2	19884.8	16740.4	0.841868	-0.248334	0.84185	-0.248365	0.00203164	0.0175491
TRCN0000010165	chr2	222282747:222437010	-	EPHA4	NM_004438	CDS	6504.74	6880.63	6105.35	0.887324	-0.172467	0.881693	-0.181651	0.00136223	0.0150546
TRCN0000010161	chr2	222282747:222437010	-	EPHA4	NM_004438	CDS	8284.52	8811.59	7724.5	0.876629	-0.189962	0.874402	-0.193631	0.00218916	0.0179308
TRCN0000006414	chr4	66185281:66536213	-	EPHA5	NM_004439	CDS	5274.96	5808.2	4708.4	0.810647	-0.302855	0.827802	-0.272643	0.00166411	0.0162241
TRCN0000006415	chr4	66185281:66536213	-	EPHA5	NM_004439	CDS	17602.3	19308.7	15789.3	0.817727	-0.290309	0.826936	-0.274152	0.0047914	0.025136
TRCN0000006420	chr6	93949740:94129300	-	EPHA7	NM_004440	CDS	6499.4	6946.72	6024.11	0.867188	-0.205583	0.86588	-0.207761	0.00497003	0.0252363
TRCN0000006423	chr1	23037331:23241823	+	EPHB2	NM_004442	CDS	12626.5	13543.2	11652.5	0.860395	-0.21693	0.871109	-0.199075	0.00511267	0.0256304
TRCN0000001773	chr7	100400187:100425143	-	EPHB4	NM_004444	CDS	6013.68	6526.75	5468.54	0.837866	-0.255208	0.846914	-0.239713	0.0140568	0.0445595
TRCN0000039879	chr17	37844337:37884915	+	ERBB2	NM_004448	CDS	2468.69	2667.02	2257.96	0.846621	-0.240211	0.851076	-0.23264	0.00217894	0.0179308
TRCN0000000621	chr12	56473809:56497291	+	ERBB3	NM_001982	CDS	1019.37	1125.46	906.658	0.805589	-0.311884	0.808871	-0.306019	0.00382809	0.0226075
TRCN0000052576	chr1	204100190:204121307	-	ETNK2	NM_018208	CDS	1943.67	2124.59	1751.45	0.824373	-0.278632	0.835797	-0.258776	0.00442298	0.0242467
TRCN0000002347	chr5	108083523:108523373	+	FER	NM_005246	CDS	4463.31	4932.92	3964.34	0.803649	-0.315363	0.822647	-0.281654	0.000904102	0.0131476
TRCN0000002350	chr5	108083523:108523373	+	FER	NM_005246	CDS	3234.07	3453.95	3000.45	0.868699	-0.203071	0.877552	-0.188444	0.012915	0.042229
TRCN0000000368	chr10	123237844:123357972	-	FGFR2	NM_000141	CDS	3482.99	3937.39	3000.19	0.761972	-0.392189	0.781624	-0.355454	0.000196548	0.009211
TRCN0000000373	chr4	1795039:1810599	+	FGFR3	NM_000142	CDS	2314.4	2491.61	2126.11	0.853308	-0.228861	0.848728	-0.236625	0.00476976	0.0251069
TRCN0000001595	chr1	27938801:27961727	-	FGR	NM_005248	CDS	5134.14	5600.47	4638.67	0.828266	-0.271835	0.827891	-0.272488	0.00158985	0.0159836
TRCN0000039705	chr13	28577411:28674729	-	FLT3	NM_004119	CDS	2370.25	2543.13	2186.57	0.859796	-0.217934	0.864181	-0.210595	0.00272276	0.0194409
TRCN0000000638	chr5	180028506:180076624	-	FLT4	NM_002020	CDS	2110.11	2359.45	1845.18	0.782036	-0.354693	0.803251	-0.316077	0.00511897	0.0256304
TRCN0000052550	chr17	80674582:80685893	+	FN3KRP	NM_024619	CDS	1490.97	1633.92	1339.08	0.819553	-0.287091	0.829628	-0.269463	0.00317779	0.0211748
TRCN0000052549	chr17	80674582:80685893	+	FN3KRP	NM_024619	CDS	1245.75	1326.51	1159.93	0.874426	-0.193592	0.871802	-0.197928	0.0157089	0.0476314
TRCN0000010096	chr6	116262693:116381921	-	FRK	NM_002031	CDS	5233.35	5484.75	4966.23	0.905462	-0.143275	0.901917	-0.148933	0.000390435	0.0105579
TRCN0000010097	chr6	116262693:116381921	-	FRK	NM_002031	CDS	5607.25	6123.69	5058.53	0.826059	-0.275684	0.837481	-0.255871	0.003907	0.0228027
TRCN0000010060	chr17	73754018:73761280	-	GALK1	NM_000154	CDS	14019	15344.9	12610.2	0.821785	-0.283167	0.831722	-0.265827	0.00217602	0.0179308
TRCN0000010059	chr17	73754018:73761280	-	GALK1	NM_000154	CDS	5934.11	6294.68	5551	0.881857	-0.181383	0.888835	-0.170012	0.0047178	0.0249915
TRCN0000010092	chr15	49447956:49622002	+	GALK2	NM_002044	CDS	6071.44	6653.38	5453.13	0.819604	-0.287002	0.820194	-0.285963	0.000484166	0.0113451
TRCN0000010099	chr15	49447956:49622002	+	GALK2	NM_002044	CDS	5024.2	5431.69	4591.25	0.84527	-0.242516	0.862249	-0.213824	0.0151166	0.0467977
TRCN0000010270	chr7	44183870:44229022	-	GCK	NM_033507	CDS	1391.86	1520.34	1255.35	0.825702	-0.276308	0.818873	-0.288289	0.000130888	0.00802518
TRCN0000037645	chr4	80327507:80329372	-	GK2	NM_033214	CDS	7268.26	7748.25	6758.27	0.872232	-0.197216	0.867452	-0.205143	0.00664542	0.0296382
TRCN0000001489	chr13	114321597:114438637	+	GRK1	NM_002929	CDS	4699.28	5065.81	4309.84	0.85077	-0.233159	0.850529	-0.233568	0.000627011	0.0120051
TRCN0000001487	chr13	114321597:114438637	+	GRK1	NM_002929	CDS	3223.13	3557.26	2868.11	0.806269	-0.310667	0.812217	-0.300063	0.00097915	0.0132573
TRCN0000000840	chr10	120967197:121215131	+	GRK5	NM_005308	CDS	3972.25	4407.81	3509.47	0.796194	-0.328807	0.794234	-0.332364	3.0666e-05	0.00602125
TRCN0000000841	chr10	120967197:121215131	+	GRK5	NM_005308	CDS	9575.39	10168	8945.72	0.879789	-0.18477	0.88212	-0.180953	0.00777291	0.0321394
TRCN0000002408	chr3	141497043:141535892	+	GRK7	NM_139209	CDS	1027.4	1147.43	899.881	0.78426	-0.350596	0.79533	-0.330374	8.21692e-05	0.00686112
TRCN0000040001	chr3	119540802:119813264	-	GSK3B	NM_002093	CDS	420.629	488.403	348.619	0.713794	-0.486421	0.737553	-0.439182	0.0014129	0.0153681
TRCN0000002022	chr12	14765568:14849519	-	GUCY2C	NM_004963	CDS	4510.29	4961.65	4030.73	0.812377	-0.299778	0.82199	-0.282808	0.000872755	0.0131476
TRCN0000002023	chr12	14765568:14849519	-	GUCY2C	NM_004963	CDS	3258.05	3578.79	2917.26	0.815152	-0.294859	0.827227	-0.273645	0.00346067	0.0217353
TRCN0000006119	chr1	228327785:228336655	+	GUK1	NM_000858	CDS	2856.45	3079.74	2619.19	0.850458	-0.233688	0.848311	-0.237334	0.00469113	0.0249837
TRCN0000009969	chr20	30639991:30689657	+	HCK	NM_002110	CDS	4720.62	5074.15	4344.99	0.856299	-0.223813	0.861576	-0.21495	0.0013554	0.0150546
TRCN0000003203	chr7	139246316:139477693	-	HIPK2	NM_022740	CDS	1917.68	2001.89	1828.21	0.913246	-0.130924	0.90967	-0.136586	0.0127743	0.0421564
TRCN0000037654	chr10	71029756:71161637	+	HK1	NM_033498	CDS	4486.24	4774.13	4180.36	0.875627	-0.191611	0.866063	-0.207456	0.00238813	0.0186586
TRCN0000037655	chr10	71029756:71161637	+	HK1	NM_033498	CDS	3999.7	4198.5	3788.47	0.902338	-0.14826	0.903822	-0.145889	0.0116647	0.0403964
TRCN0000002269	chr21	33245628:33376377	+	HUNK	NM_014586	CDS	484.581	540.224	425.46	0.787563	-0.344533	0.815511	-0.294223	0.00991607	0.0366357
TRCN0000018915	chr8	42128820:42190171	+	IKBKB	NM_001556	3UTR	3815.36	4282.72	3318.79	0.774925	-0.367871	0.800839	-0.320416	0.000133486	0.00802518
TRCN0000018919	chr8	42128820:42190171	+	IKBKB	NM_001556	CDS	1767.94	1839.06	1692.37	0.920236	-0.119925	0.910842	-0.134727	0.010379	0.0375123
TRCN0000000969	chr11	6624938:6632105	+	ILK	NM_004517	CDS	2343.17	2738.88	1922.74	0.702016	-0.510424	0.732368	-0.449359	1.24551e-05	0.00553144
TRCN0000000970	chr11	6624938:6632105	+	ILK	NM_004517	CDS	2281.49	2534.24	2012.94	0.7943	-0.332243	0.799605	-0.32264	0.000362032	0.0104839
TRCN0000000972	chr11	6624938:6632105	+	ILK	NM_004517	CDS	1842.17	1963.02	1713.77	0.873025	-0.195905	0.875301	-0.192149	0.0141458	0.0446693
TRCN0000013510	chr3	49761728:49823973	-	IP6K1	NM_153273	CDS	2059.06	2277.49	1826.97	0.802185	-0.317994	0.814754	-0.295563	0.00219712	0.0179471
TRCN0000006144	chr3	48725436:48754711	-	IP6K2	NM_016291	CDS	1122.54	1235.57	1002.45	0.811326	-0.301647	0.825798	-0.27614	0.00221413	0.0179883
TRCN0000000547	chrX	153275957:153285342	-	IRAK1	NM_001569	CDS	3056.4	3678.32	2395.61	0.651277	-0.618657	0.734658	-0.444854	6.96023e-05	0.00686112
TRCN0000000879	chr12	66582978:66648394	+	IRAK3	NM_007199	CDS	2543.64	2716.49	2360	0.868769	-0.202955	0.859596	-0.21827	0.00311592	0.0211646
TRCN0000000877	chr12	66582978:66648394	+	IRAK3	NM_007199	CDS	11488.1	12072.4	10867.3	0.900177	-0.15172	0.891231	-0.166129	0.0169993	0.05
TRCN0000010022	chr5	156607907:156682109	+	ITK	NM_005546	CDS	4151.99	4493.01	3789.65	0.843456	-0.245616	0.854307	-0.227173	0.00255893	0.01904
TRCN0000037713	chr1	226819391:226926876	-	ITPKB	NM_002221	CDS	4921.39	5216.09	4608.28	0.883473	-0.178742	0.879544	-0.185172	0.0117646	0.0405153
TRCN0000037716	chr19	41223008:41246765	+	ITPKC	NM_025194	CDS	5025.67	5491.52	4530.7	0.825036	-0.27747	0.838656	-0.253849	0.00296408	0.0206007
TRCN0000037717	chr19	41223008:41246765	+	ITPKC	NM_025194	CDS	539.752	622.308	452.037	0.726388	-0.461188	0.793809	-0.333136	0.0114462	0.0399157
TRCN0000037715	chr19	41223008:41246765	+	ITPKC	NM_025194	CDS	3071.75	3303.74	2825.26	0.855169	-0.225719	0.868193	-0.203912	0.0128175	0.0422008
TRCN0000003104	chr1	65298906:65432187	-	JAK1	NM_002227	CDS	3176.52	3426.51	2910.91	0.849527	-0.235269	0.847308	-0.239041	0.00394708	0.0229052
TRCN0000003178	chr9	4985245:5128183	+	JAK2	NM_004972	3UTR	7674.32	8044.96	7280.51	0.904978	-0.144046	0.914852	-0.12839	0.0147819	0.046046
TRCN0000000383	chr19	17935593:17958841	-	JAK3	NM_000215	3UTR	1667.37	1766.23	1562.32	0.884552	-0.176981	0.877846	-0.18796	0.0143041	0.0448833
TRCN0000037727	chr2	27309611:27323619	+	KHK	NM_000221	CDS	2510.64	2768.05	2237.14	0.8082	-0.307216	0.819999	-0.286306	0.000464269	0.0110692
TRCN0000007063	chr12	117890817:118406028	-	KSR2	NM_173598	CDS	22441.8	24657.6	20087.4	0.814653	-0.295743	0.828464	-0.271489	0.000901584	0.0131476
TRCN0000007065	chr12	117890817:118406028	-	KSR2	NM_173598	CDS	1999.33	2168.68	1819.4	0.83894	-0.253361	0.854831	-0.226288	0.00146996	0.0157249
TRCN0000001776	chr6	149979289:150039392	-	LATS1	NM_004690	CDS	5911.63	6239.28	5563.5	0.89169	-0.165385	0.885465	-0.175493	0.00396677	0.0229358
TRCN0000000882	chr13	21547176:21635722	-	LATS2	NM_014572	CDS	2828.73	3145.2	2492.48	0.792472	-0.335568	0.802738	-0.316999	0.000196725	0.009211
TRCN0000010632	chr7	97736197:97838944	+	LMTK2	NM_014916	3UTR	4497.19	4801.53	4173.82	0.869268	-0.202126	0.872463	-0.196835	0.009354	0.0352358
TRCN0000037454	NA	NA:NA	NA	LOC390975	XM_372749	CDS	4027.54	4409.21	3622.01	0.821464	-0.283731	0.839268	-0.252796	0.00335983	0.0215093
TRCN0000037455	NA	NA:NA	NA	LOC390975	XM_372749	CDS	3365.9	3648.25	3065.91	0.840377	-0.250892	0.856236	-0.223919	0.00631097	0.0288748
TRCN0000037457	NA	NA:NA	NA	LOC390975	XM_372749	CDS	3363.97	3644.34	3066.07	0.841323	-0.249268	0.845399	-0.242296	0.00652805	0.0295532
TRCN0000037434	NA	NA:NA	NA	LOC401568	XM_376950	CDS	9830.37	10705	8901.06	0.831485	-0.266238	0.846509	-0.240403	0.00655054	0.0295539
TRCN0000003154	chr15	41795840:41806085	-	LTK	NM_002344	CDS	2246.76	2375.35	2110.13	0.888346	-0.170806	0.902032	-0.148749	0.00688628	0.0300875
TRCN0000010104	chr8	56792386:56925006	+	LYN	NM_002350	CDS	5126.38	5507.95	4720.96	0.857118	-0.222435	0.857827	-0.221242	0.000150494	0.00836981
TRCN0000010101	chr8	56792386:56925006	+	LYN	NM_002350	CDS	4605.46	4843.82	4352.21	0.898507	-0.154398	0.893656	-0.162209	0.0072299	0.03061
TRCN0000037881	chr11	47290927:47351582	+	MADD	NM_003682	CDS	3315.84	3641.59	2969.74	0.815507	-0.294231	0.82272	-0.281527	0.0020933	0.0177549
TRCN0000002331	chr15	66679211:66783882	+	MAP2K1	NM_002755	CDS	4982.54	5333.56	4609.57	0.864257	-0.210468	0.865935	-0.20767	0.00299311	0.020636
TRCN0000007005	chr19	4090320:4124126	-	MAP2K2	NM_030662	CDS	13100.3	13566.2	12605.3	0.929171	-0.105985	0.915156	-0.12791	0.0112005	0.0393339
TRCN0000001391	chr17	11924135:12047148	+	MAP2K4	NM_003010	CDS	6766.47	7314.93	6183.73	0.845357	-0.242367	0.855465	-0.225219	0.00444802	0.0242467
TRCN0000001389	chr17	11924135:12047148	+	MAP2K4	NM_003010	3UTR	2472.25	2608.52	2327.47	0.892255	-0.164472	0.908919	-0.137777	0.014298	0.0448833
TRCN0000001469	chr15	67835021:68099455	+	MAP2K5	NM_145162	CDS	4452.77	4788.7	4095.85	0.855315	-0.225472	0.8579	-0.221118	0.00964911	0.035942
TRCN0000009989	chr17	67410838:67538470	+	MAP2K6	NM_002758	CDS	5719	6192.46	5215.95	0.842305	-0.247585	0.852393	-0.23041	0.00852529	0.0334984
TRCN0000001080	chr19	7968765:7979363	+	MAP2K7	NM_005043	CDS	2962.94	3223.02	2686.61	0.83357	-0.262625	0.840343	-0.250949	0.00354316	0.0218451
TRCN0000006159	chr5	56110900:56191978	+	MAP3K1	XM_042066	CDS	4570.87	4849.92	4274.38	0.881329	-0.182248	0.881666	-0.181696	0.00539552	0.0264151
TRCN0000007102	chr3	185000729:185206882	+	MAP3K13	NM_004721	3UTR	4005.57	4312.25	3679.73	0.853321	-0.228839	0.860847	-0.216171	0.00349743	0.0217353
TRCN0000002305	chr17	61699801:61773670	+	MAP3K3	NM_002401	CDS	1481.79	1628.69	1325.71	0.813975	-0.296944	0.829913	-0.268968	0.00248619	0.0189154
TRCN0000002308	chr17	61699801:61773670	+	MAP3K3	NM_002401	CDS	12144	12764.6	11484.6	0.899722	-0.152449	0.890332	-0.167584	0.00417442	0.023411
TRCN0000002306	chr17	61699801:61773670	+	MAP3K3	NM_002401	CDS	5344.64	5616.13	5056.17	0.900294	-0.151532	0.886956	-0.173066	0.00885687	0.0341817
TRCN0000000992	chr6	136878187:137113656	-	MAP3K5	NM_005923	CDS	2161.68	2310.01	2004.08	0.867564	-0.204957	0.857283	-0.222156	0.00201486	0.0175028
TRCN0000000995	chr6	136878187:137113656	-	MAP3K5	NM_005923	CDS	4286.6	4723.84	3822.03	0.809094	-0.30562	0.834566	-0.260902	0.00511905	0.0256304
TRCN0000001557	chr6	91223292:91297020	-	MAP3K7	NM_145332	CDS	2811.4	3034.03	2574.85	0.848658	-0.236745	0.832914	-0.26376	0.00909383	0.0346465
TRCN0000010013	chr10	30722950:30750762	+	MAP3K8	NM_005204	CDS	3323.02	3707.03	2915	0.786342	-0.346771	0.7875	-0.344649	0.000120845	0.00789697
TRCN0000001635	chr19	39078280:39108675	-	MAP4K1	NM_007181	CDS	5748.66	6100.25	5375.1	0.881128	-0.182577	0.882994	-0.179525	0.0104089	0.0375123
TRCN0000002234	chr11	64556609:64570713	-	MAP4K2	NM_004579	CDS	2496.79	2690.39	2291.1	0.851586	-0.231776	0.85467	-0.226561	0.00600375	0.028111
TRCN0000002237	chr11	64556609:64570713	-	MAP4K2	NM_004579	CDS	8774.01	9288.57	8227.28	0.885742	-0.175041	0.886586	-0.173667	0.00843668	0.0333666
TRCN0000000664	chr2	39476407:39664453	-	MAP4K3	NM_003618	3UTR	2610.72	2797.41	2412.38	0.862362	-0.213634	0.868481	-0.203434	0.0145296	0.0454483
TRCN0000001941	chr4	86936276:87374283	-	MAPK10	NM_138982	CDS	2578.35	2718.95	2428.96	0.893345	-0.162711	0.890219	-0.167767	0.00906681	0.0345873
TRCN0000009976	chr22	50702142:50708822	-	MAPK11	NM_002751	CDS	10109.7	10743	9436.9	0.878427	-0.187005	0.883504	-0.178691	0.00336307	0.0215093
TRCN0000009972	chr22	50702142:50708822	-	MAPK11	NM_002751	CDS	6145.92	6607.1	5655.92	0.856037	-0.224254	0.853406	-0.228695	0.00431193	0.0238617
TRCN0000010054	chr6	35995454:36079013	+	MAPK14	NM_139012	CDS	5546.11	6052.48	5008.09	0.827445	-0.273265	0.825179	-0.277221	1.30582e-05	0.00553144
TRCN0000000509	chr6	35995454:36079013	+	MAPK14	NM_001315	3UTR	1939.92	2173.25	1692	0.778556	-0.361127	0.802438	-0.317538	0.000938448	0.0132161
TRCN0000001375	chr18	48086484:48258196	+	MAPK4	NM_002747	CDS	8901.34	9463.43	8304.12	0.877496	-0.188536	0.874301	-0.193797	0.00247254	0.0189154
TRCN0000001570	chr15	52311411:52358462	+	MAPK6	NM_002748	CDS	3947.32	4159.07	3722.34	0.894994	-0.16005	0.899158	-0.153353	0.00703089	0.0304976
TRCN0000001355	chr17	19281034:19286857	+	MAPK7	NM_139034	CDS	1983.39	2153.93	1802.2	0.836702	-0.257214	0.848463	-0.237077	0.00333283	0.0214989
TRCN0000001056	chr10	49514682:49647402	+	MAPK8	NM_139049	CDS	2111.77	2301.69	1909.98	0.829819	-0.269131	0.821046	-0.284466	0.00106528	0.0134366
TRCN0000010278	chr5	179660595:179719071	-	MAPK9	NM_139069	CDS	3156.42	3332.01	2969.85	0.89131	-0.166	0.889145	-0.169509	0.00157401	0.0159836
TRCN0000000945	chr5	179660595:179719071	-	MAPK9	NM_139069	CDS	5254.22	5502.13	4990.82	0.907071	-0.140713	0.89661	-0.157448	0.00634649	0.0289492
TRCN0000000943	chr5	179660595:179719071	-	MAPK9	NM_139069	3UTR	3280.55	3573.04	2969.78	0.831164	-0.266795	0.840287	-0.251045	0.0137594	0.0439626
TRCN0000002286	chr1	206858365:206907630	+	MAPKAPK2	NM_032960	CDS	3940.16	4123.08	3745.8	0.908496	-0.138448	0.887012	-0.172975	0.00823716	0.0331916
TRCN0000006153	chr3	50649293:50686728	+	MAPKAPK3	NM_004635	3UTR	6095	6556.2	5604.98	0.854912	-0.226152	0.848873	-0.236379	4.39487e-05	0.00637819
TRCN0000006155	chr3	50649293:50686728	+	MAPKAPK3	NM_004635	CDS	2157.45	2282.56	2024.53	0.886953	-0.17307	0.875214	-0.192292	0.00544947	0.0265067
TRCN0000000684	chr12	112280032:112331228	+	MAPKAPK5	NM_003668	CDS	3219.4	3466.51	2956.84	0.852973	-0.229428	0.854431	-0.226965	0.000998939	0.0132573
TRCN0000006332	chr1	220701525:220837799	+	MARK1	NM_018650	CDS	3445.74	3668.76	3208.77	0.874619	-0.193273	0.871531	-0.198377	0.00315427	0.0211646
TRCN0000006331	chr1	220701525:220837799	+	MARK1	NM_018650	CDS	2500.02	2682.37	2306.28	0.859793	-0.217939	0.860931	-0.216031	0.00642497	0.0291744
TRCN0000006329	chr1	220701525:220837799	+	MARK1	NM_018650	CDS	5657.7	6014.73	5278.34	0.877569	-0.188416	0.876729	-0.189797	0.0090268	0.0345663
TRCN0000001564	chr14	103851701:103970166	+	MARK3	NM_002376	3UTR	3607.23	3967.6	3224.35	0.812671	-0.299257	0.824591	-0.278249	0.000532495	0.0114566
TRCN0000001567	chr14	103851701:103970166	+	MARK3	NM_002376	CDS	1422.6	1541.85	1295.89	0.840477	-0.25072	0.854627	-0.226632	0.0156265	0.0474935
TRCN0000021546	chr19	12949259:12985766	+	MAST1	NM_014975	CDS	3718.53	4077.94	3336.65	0.818218	-0.289442	0.810352	-0.303379	0.00179781	0.0168197
TRCN0000001736	chr1	46269285:46501796	+	MAST2	NM_015112	CDS	6156.4	6807.96	5464.13	0.802609	-0.317231	0.819833	-0.286598	0.00331505	0.0214302
TRCN0000021453	chr5	65892176:66465423	+	MAST4	XM_291141	CDS	2240.16	2526.12	1936.32	0.76652	-0.383604	0.78347	-0.35205	0.000376362	0.0104839
TRCN0000021451	chr5	65892176:66465423	+	MAST4	XM_291141	CDS	2553.07	2743.04	2351.22	0.857157	-0.222368	0.868523	-0.203364	0.0120233	0.0409772
TRCN0000001645	chr9	36572859:36677680	+	MELK	NM_014791	CDS	4521.61	4867.37	4154.25	0.853489	-0.228555	0.868257	-0.203806	0.00467538	0.0249837
TRCN0000001644	chr9	36572859:36677680	+	MELK	NM_014791	CDS	4060.19	4279.23	3827.45	0.894426	-0.160966	0.889872	-0.168331	0.0128598	0.042229
TRCN0000040046	chr7	116312459:116438440	+	MET	NM_000245	CDS	7932.09	8674.06	7143.75	0.823577	-0.280025	0.831566	-0.266098	0.00255729	0.01904
TRCN0000040044	chr7	116312459:116438440	+	MET	NM_000245	CDS	5668.14	5985.13	5331.33	0.890763	-0.166887	0.888748	-0.170154	0.0101503	0.0370658
TRCN0000007070	NA	NA:NA	NA	MGC42105	NM_153361	CDS	790.807	837.543	741.149	0.884909	-0.1764	0.878331	-0.187163	0.00472228	0.0249915
TRCN0000006233	chr1	47023079:47069966	-	MKNK1	NM_003684	CDS	4299.49	4834.43	3731.13	0.771783	-0.373733	0.788283	-0.343214	0.000971437	0.0132573
TRCN0000006232	chr1	47023079:47069966	-	MKNK1	NM_003684	CDS	2671.59	2879.62	2450.55	0.850998	-0.232772	0.860409	-0.216906	0.0133613	0.0430944
TRCN0000006099	chr19	2037470:2051243	-	MKNK2	NM_017572	CDS	3818.85	3992.14	3634.73	0.910473	-0.135312	0.920294	-0.119833	0.00244589	0.0189154
TRCN0000029675	chr17	60704762:60770962	+	MRC2	NM_006039	CDS	4622.63	5109.71	4105.11	0.803393	-0.315822	0.797499	-0.326445	5.30455e-05	0.00637819
TRCN0000029678	chr17	60704762:60770962	+	MRC2	NM_006039	CDS	2626.19	2775.32	2467.74	0.889173	-0.169464	0.875966	-0.191053	0.00121134	0.0141138
TRCN0000038678	chr1	11166588:11322608	-	MTOR	NM_004958	CDS	5292.29	5871.87	4676.48	0.796421	-0.328397	0.809706	-0.30453	0.00218317	0.0179308
TRCN0000037700	chr1	1682671:1711508	-	NADK	NM_023018	CDS	3862.11	4219.38	3482.52	0.825362	-0.276901	0.835023	-0.260111	0.00502211	0.0254578
TRCN0000037699	chr1	1682671:1711508	-	NADK	NM_023018	CDS	6357.67	6910.63	5770.15	0.834968	-0.260208	0.858179	-0.22065	0.0151738	0.0468531
TRCN0000037622	chr2	71295408:71305998	+	NAGK	NM_017567	CDS	6785.76	7249.69	6292.83	0.868013	-0.204212	0.866121	-0.20736	0.00264598	0.0192503
TRCN0000001698	chr3	52744796:52804965	-	NEK4	NM_003157	CDS	7206.38	7707.06	6674.41	0.866013	-0.207539	0.863129	-0.212352	0.00345437	0.0217353
TRCN0000001723	chr9	127019885:127114719	+	NEK6	NM_014397	CDS	12292.7	13152.1	11379.5	0.865226	-0.208851	0.867912	-0.204379	0.00871156	0.0339209
TRCN0000010063	chr17	49230920:49239450	+	NME1	NM_000269	CDS	6596	7404.76	5736.7	0.774732	-0.368232	0.802049	-0.318238	0.000320615	0.0100393
TRCN0000010064	chr17	49230920:49239450	+	NME1	NM_000269	CDS	450.866	509.416	388.656	0.762944	-0.39035	0.801519	-0.31919	0.00939263	0.0352928
TRCN0000010167	chr16	446755:450754	+	NME4	NM_005009	CDS	9137.42	9795.25	8438.47	0.861486	-0.2151	0.871556	-0.198335	0.00164571	0.0162221
TRCN0000010188	chr3	48335589:48342848	-	NME6	NM_005793	CDS	4633.85	4961.92	4285.27	0.863632	-0.211511	0.868779	-0.202939	5.09785e-05	0.00637819
TRCN0000010189	chr3	48335589:48342848	-	NME6	NM_005793	CDS	7284.27	7950.86	6576.03	0.827083	-0.273895	0.831227	-0.266685	0.00317486	0.0211748
TRCN0000010223	chr1	169101768:169337201	-	NME7	NM_013330	CDS	9469.66	10040	8863.67	0.882836	-0.179783	0.881999	-0.181151	0.0154683	0.0473019
TRCN0000000429	chr9	35792406:35809728	+	NPR2	NM_000907	CDS	4211.71	4477.09	3929.74	0.877744	-0.188128	0.879514	-0.185221	0.000569378	0.0116432
TRCN0000001440	chr2	27651473:27665124	+	NRBP1	NM_013392	CDS	5492.69	6068.3	4881.11	0.804362	-0.314083	0.810363	-0.303361	0.000256196	0.00977013
TRCN0000001441	chr2	27651473:27665124	+	NRBP1	NM_013392	CDS	2457.81	2603.49	2303.03	0.884595	-0.176912	0.887012	-0.172975	0.00298836	0.020636
TRCN0000001438	chr2	27651473:27665124	+	NRBP1	NM_013392	CDS	1308.96	1404.75	1207.19	0.859358	-0.218669	0.869806	-0.201235	0.0136866	0.0438612
TRCN0000021399	chr8	144915755:144923146	-	NRBP2	NM_178564	3UTR	7945.51	8569.08	7282.97	0.849913	-0.234613	0.851979	-0.23111	0.00745636	0.031217
TRCN0000037493	chrX	105066536:105202602	+	NRK	NM_198465	CDS	7286	7708.28	6837.34	0.887012	-0.172974	0.887411	-0.172326	0.0015021	0.0157265
TRCN0000037490	chrX	105066536:105202602	+	NRK	NM_198465	CDS	5293.93	5805.36	4750.53	0.818302	-0.289295	0.83413	-0.261657	0.00270435	0.0194409
TRCN0000037491	chrX	105066536:105202602	+	NRK	NM_198465	CDS	9215.06	10070.7	8305.91	0.824759	-0.277956	0.846802	-0.239903	0.0108887	0.0386896
TRCN0000001996	chr1	156785542:156851642	+	NTRK1	NM_002529	CDS	1581.25	1703.72	1451.13	0.85174	-0.231516	0.856806	-0.22296	0.00838105	0.0333256
TRCN0000002245	chr9	87283373:87641985	+	NTRK2	NM_006180	CDS	2381.97	2503.09	2253.29	0.900202	-0.15168	0.889047	-0.169669	0.0101606	0.0370658
TRCN0000002313	chr15	88419988:88799962	-	NTRK3	NM_002530	CDS	8406.41	8787.32	8001.69	0.910595	-0.135118	0.901685	-0.149305	0.00788327	0.032241
TRCN0000002309	chr15	88419988:88799962	-	NTRK3	NM_002530	CDS	1897.61	2033.74	1752.97	0.861944	-0.214333	0.867923	-0.204361	0.0164184	0.0489577
TRCN0000000902	chr12	106457125:106533811	-	NUAK1	NM_014840	CDS	1976.98	2175.5	1766.05	0.811793	-0.300817	0.814284	-0.296397	0.00149867	0.0157265
TRCN0000038018	chr6	34433838:34503000	+	PACSIN1	NM_020804	CDS	5043.53	5544.26	4511.5	0.813724	-0.297389	0.838345	-0.254384	0.00218328	0.0179308
TRCN0000038017	chr6	34433838:34503000	+	PACSIN1	NM_020804	CDS	5254.6	5769.52	4707.5	0.815925	-0.293492	0.831313	-0.266536	0.00614857	0.0285059
TRCN0000002225	chr11	77033060:77185108	-	PAK1	NM_002576	CDS	1464.63	1657.68	1259.5	0.759798	-0.396313	0.778607	-0.361034	0.00101535	0.0132573
TRCN0000002116	chr3	196466728:196559518	+	PAK2	NM_002577	CDS	552.974	611.846	490.423	0.801547	-0.31914	0.820965	-0.284607	0.0155343	0.0474555
TRCN0000003244	chrX	110187513:110464173	+	PAK3	NM_002578	CDS	3507.78	3862.79	3130.58	0.810445	-0.303214	0.825245	-0.277105	0.00662747	0.0296209
TRCN0000010198	chr19	39616420:39670046	+	PAK4	NM_005884	CDS	6143.83	6807.86	5438.29	0.798826	-0.324047	0.820176	-0.285994	0.00356773	0.0218849
[truncated: 194 more rows]

## Sheet: Up_Dn_2_shRNAs
Up	Down	Common (to be excluded)	Up 3+	Number Up	Down 3+
BRD3	CAMK1D		KIAA1804	4	PRKACG
BMP2K	BRSK2		IRAK1	3	NRK
[truncated: 134 more rows]
