# Supplementary material for: Trisomy 21 consistently activates the interferon response
Source: eLife. 2016 Jul 29;5:e16220. doi: 10.7554/eLife.16220 (PMC5012864; doi:10.7554/eLife.16220)
Supplement: Supplementary file 3. — QPROT analysis of T21 versus D21 fibroblasts. Columns include: (A) Chromosome, (B) Gene start coordinate, (C) Gene end coordinate, (D) Gene strand, (E) Gene name, (F) RFUmean (average RFU across all samples), (G) RFUmeanD21 (average RFU across all D21 samples), (H) RFUmeanT21 (average RFU across all T21samples), (I) foldChange (RFUmeanT21/RFUmeanD21), (J) log2FoldChange, (K) Zstatistic (Z-score from QPROT), (L) FDRup (FDR of upregulated proteins), (M) FDRdown (FDR of downregulated proteins). DOI: http://dx.doi.org/10.7554/eLife.16220.026 [file elife-16220-supp3.xlsx]

## Sheet: Fibroblast Proteomics
CHR	START	END	STRAND	GeneID	RFUMean	RFUMeanD21	RFUMeanT21	foldChange	log2FoldChange	Zstatistic	FDRup	FDRdown
chr21	40714241	40721047	-	HMGN1	19338.8	15726	22951.5	1.52806	0.611703	2.7819	2e-06	0.855723
chr1	196621008	196716634	+	CFH	1553.05	1185	1921.1	1.51135	0.595833	2.7388	2e-06	0.855809
chr11	112831969	113149158	+	NCAM1	569	440.3	697.7	1.58407	0.66364	2.7128	3e-06	0.855864
chr19	43696854	43709926	-	PSG4	1271.38	636.75	1906	2.33965	1.22629	2.6998	3e-06	0.855892
chr12	115108059	115121969	-	TBX3	408.65	359.95	457.35	1.64872	0.721348	2.5575	1e-05	0.856203
chr21	45138978	45182188	+	PDXK	3052.97	2555.15	3550.8	1.34851	0.431366	2.3433	8e-05	0.856648
chr16	55513081	55540586	+	MMP2	2909.93	2505.8	3314.05	1.28531	0.362116	2.338	8.4e-05	0.85666
chr6	46126919	46138747	-	ENPP5	2029.83	1754.15	2305.5	1.37851	0.463105	2.063	0.000854	0.857717
chr10	50574161	50604062	-	DRGX	32851.1	28857.5	36844.7	1.27507	0.350575	2.0463	0.000962	0.857828
chr21	37442222	37445475	+	CBR1	25458.7	18378.5	32539	1.62743	0.702592	2.0177	0.001176	0.858038
chr12	114791735	114846247	-	TBX5	4580.12	4008.6	5151.65	1.50833	0.592948	1.9799	0.00152	0.858354
chr21	35014784	35261609	+	ITSN1	4376.27	3969.55	4783	1.24608	0.317393	1.9655	0.001672	0.858486
chr17	3763617	3796337	-	CAMKK1	3009.57	2557.7	3461.45	1.27507	0.350575	1.9552	0.001789	0.858585
chr4	141309607	141348815	-	CLGN	47769.1	39623.1	55915.1	1.35527	0.438579	1.9	0.002546	0.859178
chr15	49715375	49779523	+	FGF7	1996.08	1631.25	2360.9	1.67867	0.747316	1.8989	0.002564	0.859191
chr7	23286316	23314729	+	GPNMB	53430.2	46320.1	60540.3	1.75769	0.81368	1.8934	0.002654	0.859256
chr6	76458909	76629254	+	MYO6	4597.15	3689.05	5505.25	1.50682	0.591505	1.8719	0.003032	0.859522
chr21	27252861	27543446	-	APP	80039.2	60939.7	99138.7	1.46815	0.553995	1.8663	0.003139	0.859594
chr17	74523430	74533987	-	CYGB	3283.32	2860.95	3705.7	1.97981	0.985361	1.8271	0.003984	0.860131
chr2	85621871	85641197	-	CAPG	51273.9	43870.4	58677.4	1.94644	0.960835	1.7958	0.004805	0.860601
chr1	156211951	156213123	+	BGLAP	26413.9	24187	28640.7	1.18294	0.242373	1.7899	0.004976	0.860694
chr1	110276554	110283660	-	GSTM3	3608.05	3209.9	4006.2	1.69723	0.763186	1.7771	0.005367	0.8609
chr8	17913925	17942507	-	ASAH1	10474.2	8491.2	12457.3	1.37438	0.458777	1.7416	0.006607	0.861504
chr17	40023179	40075272	-	ACLY	3509.35	3159.95	3858.75	1.25483	0.327492	1.726	0.007232	0.861785
chr2	74756532	74760683	+	HTRA2	4410.93	4121.75	4700.1	1.20563	0.269784	1.7218	0.00741	0.861863
chr17	54671060	54672951	+	NOG	1453	1340.9	1565.1	1.2411	0.311622	1.7191	0.007526	0.861913
chr21	18885224	18965897	+	CXADR	23831.8	14800.6	32862.9	1.95815	0.969491	1.709	0.007976	0.862103
chrX	8496915	8700227	-	KAL1	5355.68	4990.6	5720.75	1.19722	0.259685	1.7021	0.008298	0.862235
chr22	39473010	39483748	+	APOBEC3G	2161.3	1814.95	2507.65	1.34582	0.42848	1.6933	0.008726	0.862406
chr14	55595935	55612148	+	LGALS3	87254.5	80823.9	93685.1	1.23491	0.304409	1.677	0.009573	0.862731
chr12	6554051	6560884	+	CD27	33434.4	29253.1	37615.8	1.21896	0.285654	1.6713	0.009887	0.862848
chr11	46740743	46761056	+	F2	819.9	750.95	888.85	1.17939	0.238045	1.6688	0.010027	0.862899
chr16	55542913	55620582	+	LPCAT2	20838.7	12788.3	28889	1.93867	0.955064	1.6674	0.010107	0.862928
chr6	3000050	3020110	+	NQO2	1268.7	1185.25	1352.15	1.30996	0.389528	1.6629	0.010366	0.863021
chr8	134203282	134243932	+	WISP1	957.825	845.7	1069.95	1.31653	0.396741	1.6563	0.010758	0.86316
chr19	10764937	10803095	+	ILF3	17320.5	14272.9	20368	1.37163	0.455892	1.6513	0.011064	0.863267
chr17	11924135	12047148	+	MAP2K4	19494.6	17489.8	21499.5	1.21774	0.284211	1.651	0.011082	0.863273
chr12	96588207	96661606	+	ELK3	22930.1	19577.5	26282.7	1.34447	0.427038	1.6132	0.013668	0.864113
chr12	58162351	58165914	-	METTL1	2494.3	2133.65	2854.95	1.2141	0.279883	1.5995	0.014733	0.864434
chr3	112323233	112359990	-	CCDC80	3577.82	2774.95	4380.7	1.38403	0.468876	1.5957	0.015041	0.864525
chr21	37507263	37518860	+	CBR3	16561.6	12310.2	20813	1.55893	0.640557	1.5708	0.017206	0.865136
chr12	101549994	101604016	-	SLC5A8	3591.25	3167.35	4015.15	1.32976	0.411168	1.5686	0.01741	0.865192
chr8	2792875	4852328	-	CSMD1	3904.97	3070.85	4739.1	1.39375	0.478975	1.559	0.018324	0.865438
chr19	41256759	41271297	+	SNRPA	27584.2	22425.7	32742.8	1.32711	0.408283	1.5551	0.018708	0.865539
chr6	26055968	26056699	-	HIST1H1C	12248.9	6949.25	17548.6	1.95033	0.96372	1.5458	0.01965	0.865784
chr8	74332604	74659943	-	STAU2	3033.8	2620.35	3447.25	1.31521	0.395298	1.5423	0.020016	0.865877
chr22	30972612	31003000	-	PES1	3146.6	2050.45	4242.75	1.47846	0.564094	1.534	0.020905	0.866102
chr12	14656597	14720791	-	PLBD1	4037.2	3605.55	4468.85	1.19125	0.252472	1.5239	0.022034	0.866381
chr2	224839765	224904036	-	SERPINE2	15081.9	11412.8	18750.9	1.7932	0.842534	1.5063	0.024123	0.866882
chr15	45003685	45010357	+	B2M	12395.8	10780.5	14011.1	1.29046	0.367887	1.486	0.026737	0.867486
chr14	69726681	69821190	+	GALNT16	349.275	332.6	365.95	1.29693	0.375101	1.4766	0.028024	0.867776
chr17	61699801	61773670	+	MAP3K3	2000.03	1631.2	2368.85	1.53265	0.616031	1.4746	0.028304	0.867838
chr1	31838100	31845923	-	FABP3	22627.2	20241.3	25013.2	2.0668	1.0474	1.4724	0.028615	0.867907
chr14	65877310	66210839	+	FUT8	679.05	569.55	788.55	1.72116	0.783383	1.4703	0.028915	0.867974
chr1	25226002	25291501	-	RUNX3	4426.07	3880.75	4971.4	1.19363	0.255357	1.4555	0.031098	0.86845
chr18	67530193	67624232	-	CD226	14599.4	12320.9	16878	1.28146	0.357788	1.4508	0.031818	0.868606
chr1	110527387	110566364	+	AHCYL1	25270.6	23984.6	26556.5	1.18768	0.248144	1.4501	0.031926	0.868629
chr16	1359154	1377019	+	UBE2I	36083.5	31694.2	40472.7	1.22262	0.289982	1.4488	0.032128	0.868672
chr19	5691845	5720463	-	LONP1	9769.52	8219.7	11319.4	1.30735	0.386642	1.4474	0.032347	0.868719
chr8	82390732	82395473	-	FABP4	2007.6	2027	1988.2	1.38542	0.470319	1.4436	0.032947	0.868847
chr19	4472193	4502232	+	HDGFRP2	6335.2	3763.8	8906.6	1.72979	0.790597	1.4264	0.035773	0.86944
chr8	22409251	22433008	+	SORBS3	9107.83	8476.65	9739	1.21288	0.27844	1.4126	0.038174	0.869936
chr20	34021145	34025970	-	GDF5	7918.73	6343.85	9493.6	1.31917	0.399627	1.4064	0.039293	0.870164
chr8	108911544	109095913	-	RSPO2	1687.38	1519.35	1855.4	1.21531	0.281326	1.3673	0.046934	0.871689
chr7	8473585	8792593	+	NXPH1	10761.6	10291	11232.2	1.12075	0.164467	1.3555	0.049444	0.87218
chr9	100745489	100778224	+	ANP32B	3512.55	2491.25	4533.85	1.41623	0.502058	1.3441	0.051962	0.872668
chr11	120081747	120100650	+	OAF	948.325	862.95	1033.7	1.22262	0.289982	1.3403	0.052822	0.872834
chr20	44402847	44420547	-	WFDC3	9640.98	8078.15	11203.8	1.2789	0.354903	1.3335	0.054386	0.873135
chr14	26915089	27066960	-	NOVA1	538.75	447.5	630	1.53419	0.617473	1.3159	0.05859	0.873939
chr9	123714614	123812554	-	C5	509.95	477	542.9	1.12862	0.174566	1.3158	0.058615	0.873943
chrX	103810996	105011822	+	IL1RAPL2	2252.93	2049.7	2456.15	1.16532	0.220732	1.3056	0.061156	0.874425
chr16	89238163	89261900	+	CDH15	3310.8	3007	3614.6	1.17939	0.238045	1.3053	0.061232	0.87444
chr1	40506255	40538321	+	CAP1	18150.8	10951	25350.6	1.74892	0.806467	1.3013	0.062251	0.874632
chr17	48624450	48633213	+	SPATA20	4053.55	3793.45	4313.65	1.20202	0.265456	1.2998	0.062636	0.874705
chr1	179068462	179198819	-	ABL2	5841.85	4448.7	7235	1.41058	0.496287	1.2948	0.063932	0.874949
chr17	25958174	25976586	+	LGALS9	3181.55	2931.15	3431.95	1.15604	0.209191	1.2902	0.065141	0.875176
chr19	42734338	42746736	-	GSK3A	8019.32	7317.6	8721.05	1.23244	0.301523	1.2878	0.065778	0.875296
chr12	6058040	6233836	-	VWF	1778.58	1644.15	1913	1.15835	0.212076	1.2844	0.066688	0.875466
chr7	150035407	150038763	-	RARRES2	1498.05	1332.35	1663.75	1.38542	0.470319	1.2779	0.068453	0.875796
chr12	122326637	122355771	+	PSMD9	8501	7635.95	9366.05	1.16766	0.223618	1.2735	0.069666	0.876022
chr2	232319459	232329205	-	NCL	35139.7	27994.6	42284.7	1.24234	0.313065	1.2732	0.069749	0.876038
chr19	7741943	7744719	+	MCEMP1	57032.8	49430.4	64635.2	1.24483	0.31595	1.2702	0.070586	0.876194
chr11	57093459	57103351	-	SSRP1	2101.38	1714.75	2488	1.62418	0.699707	1.2661	0.07174	0.876408
chr20	62612431	62664453	+	PRPF6	2183.1	2052.3	2313.9	1.14912	0.200535	1.2644	0.072223	0.876498
chr1	150702672	150738433	-	CTSS	644.575	598.45	690.7	1.6603	0.731446	1.2559	0.07467	0.876951
chr5	41142248	41261540	-	C6	7149.73	6608.2	7691.25	1.17351	0.230831	1.2532	0.075459	0.877097
chr14	74433181	74486026	-	ENTPD5	9046.6	8419.75	9673.45	1.19483	0.2568	1.2485	0.076846	0.877353
chr3	9773434	9789699	+	BRPF1	3826.2	3005.95	4646.45	1.30474	0.383757	1.2471	0.077263	0.87743
chr2	140988996	142889270	-	LRP1B	43840.7	42016.5	45664.8	1.18768	0.248144	1.2446	0.078011	0.877567
chr22	29083731	29137822	-	CHEK2	665.425	619.9	710.95	1.16067	0.214962	1.2425	0.078643	0.877684
chr20	36932552	36965905	+	BPI	8722.83	8064.05	9381.6	1.20442	0.268341	1.2371	0.080285	0.877985
chr1	19629202	19638640	-	AKR7A2	66407.1	61027.7	71786.4	1.21167	0.276997	1.2319	0.081889	0.878279
chr5	150070352	150080669	-	RBM22	1754.92	1683	1826.85	1.12412	0.168795	1.2317	0.081951	0.87829
chr14	103985995	103989196	-	CKB	2541.68	1914.9	3168.45	1.6048	0.682395	1.2215	0.085162	0.878876
chr3	33038100	33138694	-	GLB1	283.525	207.15	359.9	1.38819	0.473204	1.2208	0.085386	0.878917
chr1	23636276	23670853	-	HNRNPR	2838.3	2683.5	2993.1	1.13655	0.184665	1.2183	0.086187	0.879063
chr2	113875470	113891593	+	IL1RN	3901.7	3674.35	4129.05	1.34447	0.427038	1.2181	0.086252	0.879074
chr2	204801471	204826298	+	ICOS	4897.43	4500.65	5294.2	1.19363	0.255357	1.2179	0.086316	0.879086
chrX	78615881	78623049	-	ITM2A	21809.9	19517.2	24102.7	1.21774	0.284211	1.2148	0.087318	0.879268
chr12	57522282	57607125	+	LRP1	2502.45	2108.15	2896.75	1.2411	0.311622	1.2132	0.087838	0.879363
chr1	92145900	92371559	-	TGFBR3	3176.88	3128.65	3225.1	1.23986	0.310179	1.2116	0.088361	0.879457
chr19	43671895	43690688	-	PSG5	1198.2	940.5	1455.9	1.49033	0.575635	1.2106	0.088689	0.879517
chr17	76849059	76921472	-	TIMP2	35088.7	29072.5	41104.8	1.35663	0.440022	1.2098	0.088951	0.879564
chr7	74071991	74175022	+	GTF2I	5908.05	4735.3	7080.8	1.44918	0.53524	1.2085	0.089379	0.879642
chr1	43747557	43751288	-	C1orf210	2997.53	2643.05	3352	1.23121	0.300081	1.2059	0.09024	0.879798
chr4	134070470	134112732	+	PCDH10	9097.55	8623.5	9571.6	1.11293	0.154368	1.2053	0.090439	0.879834
chr19	16466055	16582823	-	EPS15L1	1586.53	1486.25	1686.8	1.15027	0.201977	1.2018	0.091608	0.880045
chr8	62413115	62627199	-	ASPH	8226.5	7665.1	8787.9	1.15604	0.209191	1.1961	0.093533	0.880392
chr16	27413483	27463363	+	IL21R	31140.7	19793.1	42488.2	1.62093	0.696822	1.1944	0.094113	0.880496
chr7	75398842	75419064	-	CCL26	5008.9	4579.9	5437.9	1.18887	0.249586	1.1882	0.096248	0.88088
chr1	12227060	12269277	+	TNFRSF1B	1319.15	1196.15	1442.15	1.34313	0.425595	1.1859	0.097048	0.881023
chr17	7191571	7197876	-	YBX2	123523	113677	133369	1.14454	0.194764	1.1839	0.097747	0.881148
chr17	79910383	79919057	-	NOTUM	30530.7	27296.3	33765.2	1.18412	0.243815	1.1763	0.100437	0.881629
chr9	136443537	136445368	-	FAM163B	13996.5	12803	15189.9	1.13428	0.18178	1.1633	0.105153	0.882467
chr7	47834889	47859444	+	C7orf69	3118.18	2828.55	3407.8	1.21046	0.275555	1.1618	0.105707	0.882565
chr5	134906371	134914969	-	CXCL14	43067	38055.2	48078.8	1.20925	0.274112	1.1587	0.106858	0.882768
chr22	39526779	39548538	-	CBX7	5333.8	4766.6	5901	1.14912	0.200535	1.1579	0.107156	0.882821
chr11	925809	1012245	+	AP2A2	21380.2	20311.2	22449.3	1.23615	0.305851	1.1564	0.107717	0.88292
chr1	23037331	23241823	+	EPHB2	2489.97	2041.55	2938.4	1.25986	0.333263	1.1546	0.108392	0.883039
chr2	238232655	238322850	-	COL6A3	5351.45	2168.25	8534.65	1.74194	0.800696	1.1502	0.110055	0.883332
chr1	40026485	40042521	-	PABPC4	99382.9	88095.8	110670	1.20925	0.274112	1.1472	0.111199	0.883533
chr17	46908350	46942607	+	CALCOCO2	4941.5	4499.45	5383.55	1.13997	0.188993	1.1445	0.112236	0.883715
chr7	156797547	156803347	-	MNX1	1624.95	1484.9	1765	1.17586	0.233717	1.1418	0.113279	0.883898
chr10	72643265	72648543	-	PCBD1	2157.32	1887.6	2427.05	1.19842	0.261128	1.1417	0.113317	0.883905
chr17	41924516	41940997	+	CD300LG	4599.27	4315.15	4883.4	1.14568	0.196207	1.1395	0.114172	0.884054
chr6	84743420	84800605	+	MRAP2	6937.65	6697.75	7177.55	1.12187	0.16591	1.1392	0.114289	0.884075
chr2	220378892	220403494	+	ASIC4	4682.7	4342.7	5022.7	1.15604	0.209191	1.1385	0.114562	0.884122
chr21	28208606	28217728	-	ADAMTS1	2621.53	2402.4	2840.65	1.17117	0.227946	1.1355	0.115737	0.884328
chr12	4543308	4554780	-	FGF6	1315.42	1225.45	1405.4	1.18412	0.243815	1.1318	0.117198	0.884582
chr11	18287808	18291523	+	SAA1	956.2	902.75	1009.65	1.11516	0.157254	1.1269	0.119151	0.884922
chr4	69176105	69215824	-	YTHDC1	726.25	703.95	748.55	1.1572	0.210633	1.1243	0.120196	0.885103
chr3	89156674	89531284	+	EPHA3	513.725	473.45	554	1.30604	0.3852	1.1238	0.120397	0.885138
chr3	129033614	129035120	-	H1FX	35643.4	23936.5	47350.3	1.50833	0.592948	1.1223	0.121004	0.885243
chr10	125767182	125853123	-	CHST15	1595.03	1091	2099.05	1.74717	0.805024	1.1203	0.121815	0.885383
chr3	59735036	61237133	-	FHIT	628.35	556.25	700.45	1.29563	0.373658	1.1171	0.123122	0.885609
chr13	21277482	21297237	+	IL17D	1906.12	1776.95	2035.3	1.15373	0.206305	1.1163	0.12345	0.885666
chr17	7311502	7323183	+	NLGN2	921.4	873.6	969.2	1.14912	0.200535	1.1128	0.124891	0.885914
chr17	40949636	40950743	-	COA3	13689.1	12561.6	14816.6	1.22018	0.287096	1.1101	0.126011	0.886107
chr8	98881311	99048946	+	MATN2	2124.15	1833.65	2414.65	1.18175	0.24093	1.105	0.128145	0.886473
chr19	51581154	51587502	-	KLK14	917.575	835.5	999.65	1.18412	0.243815	1.1021	0.129369	0.886683
chr2	56093097	56151298	-	EFEMP1	14396.5	13920.5	14872.5	1.17351	0.230831	1.099	0.130685	0.886907
chr14	90422246	90511108	+	TDP1	9695.12	8605	10785.2	1.18175	0.24093	1.0942	0.132741	0.887258
chr1	28157252	28178183	+	PPP1R8	6146.05	5415.7	6876.4	1.29046	0.367887	1.093	0.133259	0.887346
chr10	14861251	14879983	-	CDNF	1502.6	1438.3	1566.9	1.123	0.167353	1.0907	0.134254	0.887515
chr2	224461658	224467217	-	SCG2	1679.62	1527.9	1831.35	1.17468	0.232274	1.0902	0.134471	0.887552
chr1	183904966	184006863	-	COLGALT2	1242.05	1204.35	1279.75	1.2141	0.279883	1.0898	0.134645	0.887581
chr14	21677296	21737638	-	HNRNPC	4741	4202.15	5279.85	1.21653	0.282768	1.0859	0.136347	0.88787
chr14	23305742	23316808	+	MMP14	1194	1108.55	1279.45	1.11739	0.160139	1.0854	0.136566	0.887907
chr1	175126123	175162229	-	KIAA0040	22272	19532	25011.9	1.21046	0.275555	1.0832	0.137533	0.88807
chr16	30435019	30441373	-	DCTPP1	1634.28	1164.15	2104.4	1.57302	0.653541	1.0816	0.138239	0.88819
chr6	30851861	30867933	+	DDR1	2014.75	1890.45	2139.05	1.22998	0.298638	1.0813	0.138372	0.888212
chr22	50166937	50218452	-	BRD1	683.475	631.3	735.65	1.19363	0.255357	1.0804	0.138771	0.888279
chrX	119737744	119755016	+	MCTS1	2266.68	2009.7	2523.65	1.20563	0.269784	1.079	0.139392	0.888384
chr17	73314157	73401790	-	GRB2	11561	10742.6	12379.5	1.16416	0.21929	1.0783	0.139703	0.888436
chr16	11762289	11773015	+	SNN	1019.27	531.85	1506.7	1.44918	0.53524	1.078	0.139837	0.888459
chr4	76567953	76598667	-	G3BP2	70283.6	68585.9	71981.2	1.21167	0.276997	1.0742	0.141537	0.888745
chr3	53195223	53226733	+	PRKCD	11546.3	9914.75	13177.9	1.16067	0.214962	1.0737	0.141761	0.888782
chr10	133781204	133795435	-	BNIP3	2795.4	2563.15	3027.65	1.15951	0.213519	1.0715	0.142752	0.888949
chr1	120436156	120439147	-	ADAM30	888.725	824.4	953.05	1.17	0.226503	1.0703	0.143295	0.88904
chr22	20778874	20792146	-	SCARF2	6137.95	5071.65	7204.25	1.24359	0.314508	1.0694	0.143703	0.889108
chr9	137772658	137779366	+	FCN2	4684.45	4480.1	4888.8	1.1096	0.15004	1.0686	0.144066	0.889169
chr17	18923990	18950336	-	GRAP	5434.4	4948.9	5919.9	1.17117	0.227946	1.068	0.144338	0.889214
chr12	108523511	108644313	+	WSCD2	48797	38000.9	59593	1.2866	0.363559	1.0674	0.144611	0.88926
chr19	54799850	54804265	-	LILRA3	537.375	510.25	564.5	1.13428	0.18178	1.067	0.144794	0.88929
chr1	149895209	149900144	-	SF3B4	836.725	754.6	918.85	1.15488	0.207748	1.0651	0.145661	0.889435
chr14	97263684	97347951	+	VRK1	2311.07	2196.7	2425.45	1.14912	0.200535	1.0637	0.146303	0.889542
chr17	32582296	32584220	+	CCL2	659.65	611.25	708.05	1.13542	0.183222	1.0625	0.146854	0.889634
chr3	180701498	180707562	-	DNAJC19	1567.7	1491.05	1644.35	1.12075	0.164467	1.0564	0.149676	0.890103
chr17	80200537	80231618	-	CSNK1D	8849.7	7194.35	10505	1.4362	0.522256	1.0542	0.150703	0.890273
chr12	132413745	132428406	+	PUS1	634.075	580.7	687.45	1.16532	0.220732	1.0541	0.15075	0.890281
chrX	151081361	151093642	+	MAGEA4	249.725	119.5	379.95	1.58091	0.660754	1.0529	0.151312	0.890374
chr16	75600249	75611779	+	GABARAPL2	59491.9	53716.5	65267.4	1.19722	0.259685	1.0522	0.15164	0.890428
chr12	91539035	91576806	-	DCN	2032.25	1538.25	2526.25	1.29175	0.36933	1.0519	0.151781	0.890451
chr6	74405808	74538041	+	CD109	1194.42	1152.65	1236.2	1.11182	0.152926	1.0377	0.158546	0.891564
chr1	149874872	149889434	-	SV2A	1917.67	1903.6	1931.75	1.13315	0.180337	1.0366	0.159078	0.891651
chrX	128674252	128726530	+	OCRL	8152.2	7501.1	8803.3	1.17234	0.229389	1.0355	0.159611	0.891738
chr16	1401900	1413352	+	GNPTG	5841.57	5432.35	6250.8	1.17468	0.232274	1.0202	0.167142	0.89296
chr19	54385467	54410901	+	PRKCG	517.3	486.3	548.3	1.13428	0.18178	1.0195	0.167492	0.893016
chr7	1606970	1609668	-	PSMG3	1259.4	1160.8	1358	1.14683	0.197649	1.0191	0.167692	0.893048
chrX	153712056	153715009	-	UBL4A	12250	11921.2	12578.7	1.17351	0.230831	1.0167	0.168896	0.893242
chr12	110810705	110841535	-	ANAPC7	1004.52	973.25	1035.8	1.09856	0.135613	1.0161	0.169198	0.893291
chr17	79801034	79818544	-	P4HB	505.9	476.9	534.9	1.11405	0.155811	1.0153	0.169601	0.893356
chr5	102201527	102366808	+	PAM	1816.47	1679.65	1953.3	1.24234	0.313065	1.015	0.169752	0.89338
chr5	176513873	176525143	+	FGFR4	5114.48	4798.8	5430.15	1.11071	0.151483	1.0123	0.171117	0.893599
chr20	48249483	48330421	-	B4GALT5	2679.7	2497.05	2862.35	1.11516	0.157254	1.0118	0.17137	0.893639
chr15	41786056	41795757	+	ITPKA	2001.2	1801.75	2200.65	1.1275	0.173123	1.0104	0.172082	0.893753
chr7	7398244	7575460	-	COL28A1	11691.1	10118.7	13263.6	1.25986	0.333263	1.001	0.176904	0.894522
chr18	9913955	9960018	+	VAPA	5974.8	5954.2	5995.4	1.67699	0.745873	1.0005	0.177162	0.894563
chr6	110299459	110301923	+	GPR6	133.225	82.45	184	1.32711	0.408283	0.9956	0.179711	0.894966
chr6	87795216	87804865	-	CGA	1093.17	1027.1	1159.25	1.11739	0.160139	0.9899	0.182704	0.895438
chr9	136397286	136440641	+	ADAMTSL2	1125.7	1056.75	1194.65	1.13769	0.186108	0.9883	0.183549	0.895571
chr12	120875893	120878545	+	COX6A1	429.175	272.65	585.7	1.36206	0.445793	0.9877	0.183867	0.895621
chr10	75670862	75677258	+	PLAU	2159.65	2073.65	2245.65	1.11739	0.160139	0.9847	0.18546	0.895871
chr4	3505324	3534224	-	LRPAP1	66601	62168.2	71033.8	1.17	0.226503	0.9834	0.186154	0.895979
chr2	85811531	85820511	+	VAMP5	1248.12	834.2	1662.05	1.28531	0.362116	0.983	0.186367	0.896012
chr2	98330031	98356323	+	ZAP70	1507.42	1453.2	1561.65	1.10517	0.14427	0.9821	0.186848	0.896087
chr20	16252749	16554079	-	KIF16B	22097.7	20379.2	23816.2	1.16183	0.216404	0.9813	0.187277	0.896154
chr9	32455300	32526322	-	DDX58	1758.75	1713.4	1804.1	1.10296	0.141384	0.9768	0.189697	0.896531
chr15	40226325	40327797	+	EIF2AK4	769.125	536.25	1002	1.29434	0.372215	0.9765	0.189859	0.896556
chr19	51020150	51071302	-	LRRC4B	4218.57	3638.1	4799.05	1.18412	0.243815	0.9761	0.190075	0.89659
chr7	22766766	22771621	+	IL6	706.575	677.45	735.7	1.35527	0.438579	0.9673	0.194867	0.897331
chr10	6052657	6104333	-	IL2RA	4935.85	4402.3	5469.4	1.15488	0.207748	0.9656	0.195802	0.897475
chr4	74735109	74737019	+	CXCL1	1808.6	1744.5	1872.7	1.37713	0.461662	0.9652	0.196022	0.897508
chrX	70327254	70331481	-	IL2RG	2225.68	2073.25	2378.1	1.15373	0.206305	0.9644	0.196463	0.897576
chr1	948847	949919	+	ISG15	6504.95	5411.9	7598	1.35798	0.441465	0.9622	0.197678	0.897763
chr3	190984944	191048325	-	UTS2B	40118.9	35621	44616.8	1.20683	0.271227	0.9577	0.200177	0.898145
chr1	24122089	24127294	-	GALE	14921.4	13102.5	16740.2	1.12075	0.164467	0.9567	0.200735	0.89823
chr5	179041179	179050722	-	HNRNPH1	84320.5	80554.2	88086.8	1.163	0.217847	0.9525	0.203089	0.898588
chr15	100267606	100273649	-	LYSMD4	1193.72	1123.75	1263.7	1.15027	0.201977	0.9504	0.204272	0.898767
chr11	57479995	57508445	+	TMX2	1257.53	1146.95	1368.1	1.163	0.217847	0.9498	0.20461	0.898818
chr19	45010211	45033548	-	CEACAM20	569.75	536.7	602.8	1.10738	0.147155	0.9493	0.204893	0.898861
chr20	39988606	39995498	-	EMILIN3	6038.57	5457.6	6619.55	1.16766	0.223618	0.9484	0.205402	0.898938
chr12	94542499	94701451	+	PLXNC1	1142.97	870.25	1415.7	1.31521	0.395298	0.9483	0.205459	0.898947
chr17	1247834	1303556	-	YWHAE	22295.2	18117.8	26472.5	1.26491	0.339033	0.947	0.206195	0.899058
chr3	45123766	45187914	-	CDCP1	1945.45	1719.75	2171.15	1.34716	0.429923	0.9419	0.209101	0.899495
chr1	179851177	179889212	+	TOR1AIP1	33348	31780.7	34915.4	1.0909	0.125514	0.9415	0.20933	0.89953
chr14	23456110	23479410	-	C14orf93	98821.8	90441.1	107203	1.09308	0.1284	0.9395	0.210476	0.899702
chr19	1941161	1981336	+	CSNK1G2	2755	2628.95	2881.05	1.09856	0.135613	0.9393	0.210591	0.899719
chr17	42422491	42430470	+	GRN	71827.4	69086.9	74568	1.17117	0.227946	0.9384	0.211108	0.899796
chr1	57110990	57181008	+	PRKAA2	1529	1469.75	1588.25	1.11293	0.154368	0.9377	0.211511	0.899857
chr19	45349393	45392485	+	PVRL2	1697.22	1631.3	1763.15	1.09199	0.126957	0.9376	0.211569	0.899865
chr4	20730239	21950374	-	KCNIP4	3162.03	1355.15	4968.9	1.5388	0.621802	0.9357	0.212664	0.900029
chr7	22157908	22396533	-	RAPGEF5	4605.07	4322.3	4887.85	1.11516	0.157254	0.9325	0.214517	0.900305
chr4	74606223	74609433	+	CXCL8	1487.5	1410.2	1564.8	1.83859	0.878601	0.9316	0.21504	0.900382
chr10	71962586	71993190	-	PPA1	27458	26335.9	28580.1	1.15027	0.201977	0.9273	0.217548	0.900754
chrX	65815482	65859140	-	EDA2R	3309.38	3146.35	3472.4	1.12637	0.171681	0.9272	0.217607	0.900763
chr11	67351066	67354124	+	GSTP1	57067.2	53063.9	61070.4	1.17939	0.238045	0.9256	0.218544	0.900901
chr2	44113363	44223144	-	LRPPRC	1169.62	976.35	1362.9	1.16766	0.223618	0.9247	0.219073	0.900979
chrX	64887511	64961793	+	MSN	2160.38	1854.95	2465.8	1.23986	0.310179	0.9216	0.220899	0.901248
chr1	207494817	207534311	+	CD55	1516.12	1463.55	1568.7	1.08004	0.111088	0.9209	0.221312	0.901308
chr1	240652873	240775462	-	GREM2	5608.43	4544.55	6672.3	1.48142	0.566979	0.9141	0.225351	0.901899
chr1	9294863	9331394	+	H6PD	12775.3	12260	13290.6	1.19483	0.2568	0.9118	0.226726	0.902099
chr8	57353513	57359282	-	PENK	2421.72	2331.95	2511.5	1.22507	0.292867	0.9112	0.227086	0.902151
chr7	110731062	110765509	+	LRRN3	2968.5	2839.75	3097.25	1.10628	0.145712	0.9084	0.228768	0.902395
chr19	51328545	51334779	-	KLK15	3354.1	2983.45	3724.75	1.13088	0.177451	0.9056	0.230458	0.902639
chr2	96789589	96804175	-	ASTL	3530.1	1936.1	5124.1	1.38958	0.474647	0.9051	0.23076	0.902683
chr2	62900986	63273621	+	EHBP1	4378.15	4102.9	4653.4	1.16649	0.222175	0.905	0.230821	0.902692
chr10	102767440	102790914	-	PDZD7	2102.2	1944.25	2260.15	1.13655	0.184665	0.9014	0.233004	0.903006
chr11	46698625	46722215	-	ARHGAP1	3215.12	2831.1	3599.15	1.29305	0.370773	0.8999	0.233918	0.903137
chr12	5541280	5604465	+	NTF3	386.35	366.65	406.05	1.09966	0.137056	0.899	0.234467	0.903215
chr12	108126643	108154914	-	PRDM4	10407.6	10000.7	10814.5	1.07681	0.106759	0.896	0.236302	0.903477
chr12	11033560	11324222	-	PRH1	1388	1298.45	1477.55	1.11628	0.158696	0.8952	0.236792	0.903547
chr1	156669400	156675608	-	CRABP2	79852.9	72545.4	87160.4	1.39934	0.484746	0.895	0.236915	0.903565
chr4	90645250	90759447	-	SNCA	296.275	271.35	321.2	1.13428	0.18178	0.8944	0.237284	0.903617
chr4	75310815	75490485	+	AREG	2008.2	1821.65	2194.75	1.16532	0.220732	0.8938	0.237652	0.90367
chr7	134127107	134143888	-	AKR1B1	21638	18371.5	24904.7	1.35934	0.442907	0.8908	0.239501	0.903932
chr13	107142079	107187388	-	EFNB2	469.525	452.25	486.8	1.09417	0.129843	0.889	0.240614	0.904089
chr6	96025373	96057328	+	MANEA	4690.5	4483.85	4897.15	1.13769	0.186108	0.8882	0.241109	0.904159
chr12	117298225	117319232	-	HRK	3761.6	3583.4	3939.8	1.13315	0.180337	0.8881	0.241171	0.904168
chr20	44519591	44527458	+	CTSA	9713.3	9038.8	10387.8	1.2141	0.279883	0.8874	0.241605	0.904229
chr21	11020842	11098925	-	BAGE3	908.675	874.15	943.2	1.09856	0.135613	0.8855	0.242786	0.904396
chr11	46402334	46405387	+	MDK	2332.9	2223.65	2442.15	1.08004	0.111088	0.8842	0.243595	0.904509
chr1	207076631	207095378	-	FAIM3	1374.75	1331.5	1418	1.10849	0.148598	0.8828	0.244468	0.904632
chr5	64444563	64777704	-	ADAMTS6	61500.8	58004.2	64997.4	1.16183	0.216404	0.8822	0.244843	0.904685
chr6	64345707	64425418	+	PHF3	972.175	908.15	1036.2	1.19363	0.255357	0.8813	0.245406	0.904763
chr1	158979682	159024945	+	IFI16	46708.5	39510.4	53906.7	1.19961	0.26257	0.8807	0.245781	0.904816
chr6	50011288	50016364	-	DEFB112	348.8	324	373.6	1.11405	0.155811	0.8795	0.246533	0.904921
chr17	43138680	43186382	+	NMT1	8012.85	7912.85	8112.85	1.08004	0.111088	0.875	0.249364	0.905315
chr6	31539876	31542100	+	LTA	2718	2574.35	2861.65	1.11516	0.157254	0.873	0.250628	0.90549
chr3	164904508	164914469	-	SLITRK3	4025.22	3684.35	4366.1	1.12524	0.170238	0.8717	0.251451	0.905604
chr10	72163861	72188374	+	EIF4EBP2	709.725	675.8	743.65	1.10407	0.142827	0.8704	0.252276	0.905718
chr22	21996542	21998588	+	SDF2L1	8124.68	7201.4	9047.95	1.2214	0.288539	0.87	0.25253	0.905753
chr7	136912092	137028546	-	PTN	6860.4	6289.8	7431	1.123	0.167353	0.8693	0.252975	0.905814
chr7	44421965	44530385	-	NUDCD3	460.175	435.8	484.55	1.07573	0.105317	0.8676	0.254057	0.905963
chr1	167399877	167487847	-	CD247	2169.05	2042.4	2295.7	1.09308	0.1284	0.8675	0.254121	0.905972
chr2	76974850	77749502	-	LRRTM4	1891.58	1782.5	2000.65	1.11293	0.154368	0.8667	0.254631	0.906042
chr19	14491956	14519537	+	CD97	5481.6	5280.75	5682.45	1.07037	0.0981033	0.8667	0.254631	0.906042
chr20	31823802	31831115	+	BPIFA1	5342.18	5048.55	5635.8	1.10407	0.142827	0.8606	0.258539	0.906576
chr19	1286153	1301429	+	EFNA2	919.75	898.35	941.15	1.13542	0.183222	0.859	0.259569	0.906716
chrX	69506211	69509798	-	PDZD11	781.55	728.5	834.6	1.12075	0.164467	0.859	0.259569	0.906716
chr18	29202209	29264686	-	B4GALT6	538.525	493.9	583.15	1.09966	0.137056	0.8578	0.260343	0.906821
chrX	69664705	69725339	+	DLG3	1187.97	1138.45	1237.5	1.08654	0.119744	0.8564	0.261247	0.906944
chr5	52856465	52979171	+	NDUFS4	8589.45	8071.35	9107.55	1.10849	0.148598	0.8559	0.26157	0.906988
chr4	4387983	4420785	+	NSG1	1361.22	1334.15	1388.3	1.11516	0.157254	0.8547	0.262347	0.907093
chr14	25100161	25103432	-	GZMB	570.875	540.6	601.15	1.10076	0.138499	0.8521	0.264035	0.90732
chr22	38054737	38062939	+	PDXP	1710.17	1578.35	1842	1.15373	0.206305	0.8504	0.265141	0.907468
chr11	1411129	1483919	+	BRSK2	3493.65	3275.35	3711.95	1.08981	0.124072	0.8495	0.265728	0.907547
chr3	186648315	186796341	+	ST6GAL1	18817.8	17285	20350.7	1.16416	0.21929	0.8484	0.266446	0.907643
chr11	747432	765024	+	TALDO1	93180.9	80558.6	105803	1.32578	0.40684	0.8477	0.266903	0.907704
chr1	207070788	207077484	+	IL24	1063.92	1025.35	1102.5	1.08654	0.119744	0.8447	0.268868	0.907966
chr1	32645345	32663886	+	TXLNA	12051.7	11508	12595.4	1.17821	0.236602	0.8433	0.269787	0.908089
chr2	131349738	131357148	-	CFC1	2958.75	2761.2	3156.3	1.08112	0.11253	0.8407	0.271499	0.908315
chr12	7055740	7070479	+	PTPN6	3053.85	2937.15	3170.55	1.12524	0.170238	0.839	0.272621	0.908464
chr16	127018	135850	+	MPG	5965.65	5800.7	6130.6	1.10407	0.142827	0.8358	0.274739	0.908742
chr19	39405904	39421536	-	SARS2	9035.3	8520.95	9549.65	1.12412	0.168795	0.8349	0.275336	0.908821
chr15	75074425	75095539	+	CSK	14320.2	13726	14914.4	1.23368	0.302966	0.8309	0.277998	0.909168
chr2	70187224	70189397	-	ASPRV1	748.9	709.1	788.7	1.09636	0.132728	0.8306	0.278198	0.909195
chr8	33228344	33330664	-	FUT10	9926.33	9892.25	9960.4	1.123	0.167353	0.8306	0.278198	0.909195
chr22	41601313	41627275	+	L3MBTL2	997.3	919.05	1075.55	1.13769	0.186108	0.8305	0.278265	0.909203
chr15	59171244	59225852	-	SLTM	1132.45	1043.7	1221.2	1.09199	0.126957	0.8288	0.279401	0.909351
chr1	205055270	205091150	-	RBBP5	12837.1	11975.7	13698.5	1.14225	0.191878	0.8285	0.279601	0.909377
chr14	103800339	103811361	+	EIF5	40508.2	33006.5	48009.8	1.33376	0.415496	0.8261	0.281209	0.909585
chr8	80523049	80578410	+	STMN2	23217.2	23923.8	22510.7	1.21167	0.276997	0.826	0.281276	0.909594
chr6	33762449	33771793	-	MLN	3347.1	3185.25	3508.95	1.10407	0.142827	0.8225	0.283629	0.909897
chr11	73087405	73108519	+	RELT	955.4	886.55	1024.25	1.12412	0.168795	0.8221	0.283898	0.909932
chr6	44081373	44095191	-	MRPL14	4832.68	4336.5	5328.85	1.17234	0.229389	0.8199	0.285383	0.910122
chr12	7167980	7178335	+	C1S	2272.78	2142.15	2403.4	1.11071	0.151483	0.8184	0.286397	0.910252
chrX	123480132	123507010	+	SH2D1A	3403.1	3276	3530.2	1.13428	0.18178	0.8166	0.287616	0.910407
chr5	63986135	64014017	+	FAM159B	663.475	577.95	749	1.11851	0.161582	0.816	0.288023	0.910459
chr20	23331373	23335408	+	NXT1	10006.2	9087.75	10924.6	1.20081	0.264013	0.8124	0.29047	0.91077
chr12	125396191	125399587	-	UBC	23010.8	22579.2	23442.5	1.13655	0.184665	0.8088	0.292928	0.911079
chr16	57438679	57449974	+	CCL17	1299.15	1277.75	1320.55	1.08763	0.121186	0.8055	0.295188	0.911363
chr22	29663998	29696515	+	EWSR1	105489	102744	108234	1.09199	0.126957	0.8055	0.295188	0.911363
chr12	56119227	56123457	-	CD63	7144.73	6908.75	7380.7	1.10407	0.142827	0.8038	0.296356	0.911508
chr5	140771483	140892546	+	PCDHGA8	1165.75	1108.6	1222.9	1.0822	0.113973	0.8026	0.297182	0.911611
chr18	9102628	9134343	+	NDUFV2	27295.4	25909.8	28681	1.10076	0.138499	0.8006	0.29856	0.911782
chr7	131185021	131241376	-	PODXL	2384.88	1985.95	2783.8	1.16183	0.216404	0.7988	0.299803	0.911936
chr12	10004968	10022458	-	CLEC2B	3796.28	3663.55	3929	1.07251	0.100989	0.7984	0.300079	0.91197
chr17	32687347	32690252	-	CCL1	2930.15	2737	3123.3	1.12075	0.164467	0.7981	0.300287	0.911996
chr12	98909351	98944157	+	TMPO	58477.5	55553.2	61401.8	1.14568	0.196207	0.7981	0.300287	0.911996
chr17	72690447	72709139	-	CD300LF	1265.67	1225.05	1306.3	1.07358	0.102431	0.7976	0.300633	0.912039
chr19	45147098	45169428	+	PVR	2367.82	2174.1	2561.55	1.0822	0.113973	0.7964	0.301464	0.912141
chr11	64085560	64089295	+	PRDX5	782.725	760.9	804.55	1.0822	0.113973	0.7961	0.301671	0.912166
chr2	187454790	187545629	+	ITGAV	43545.1	43822.4	43267.7	1.2263	0.29431	0.796	0.301741	0.912175
chr12	10103915	10138194	+	CLEC12A	717.575	699.15	736	1.08872	0.122629	0.7957	0.301949	0.912201
chr1	77333186	77529737	+	ST6GALNAC5	661.725	629.4	694.05	1.09417	0.129843	0.7954	0.302157	0.912226
chr12	56137064	56146665	+	GDF11	1552	1419.5	1684.5	1.12975	0.176009	0.7938	0.303267	0.912362
chr1	162531296	162569633	+	UAP1	16125.4	14857.4	17393.5	1.17351	0.230831	0.7916	0.304797	0.912549
chr4	5016314	5021197	-	CYTL1	2215.5	2046.15	2384.85	1.12524	0.170238	0.7905	0.305564	0.912643
chr7	93514709	93520303	-	TFPI2	725.5	674	777	1.28274	0.359231	0.79	0.305912	0.912685
chr1	203185207	203198860	-	CHIT1	2768.78	2569.6	2967.95	1.09636	0.132728	0.7899	0.305982	0.912694
chr4	88742550	88767968	+	MEPE	446.125	416.2	476.05	1.09746	0.134171	0.7897	0.306122	0.912711
chr21	43731777	43735706	-	TFF3	737.975	715.05	760.9	1.09966	0.137056	0.7887	0.30682	0.912795
chr11	3876933	4114440	+	STIM1	10246.8	10150.8	10342.7	1.13428	0.18178	0.7871	0.307938	0.912931
chr17	38024455	38034149	+	ZPBP2	512.65	480.95	544.35	1.10296	0.141384	0.787	0.308008	0.912939
chr16	66878282	66888049	+	CA7	469.5	442.75	496.25	1.07896	0.109645	0.787	0.308008	0.912939
chr3	112534556	112564797	-	CD200R1L	3797.55	3539.05	4056.05	1.13315	0.180337	0.7869	0.308078	0.912948
chr4	174252527	174255595	-	HMGB2	10650.5	7640.85	13660.1	1.46961	0.555438	0.7861	0.308637	0.913016
chr21	22370633	22912517	+	NCAM2	512.3	472	552.6	1.09199	0.126957	0.786	0.308707	0.913024
chr4	73146686	73434516	-	ADAMTS3	1710.25	1628.8	1791.7	1.10849	0.148598	0.7857	0.308917	0.913049
chr2	36583370	36778278	+	CRIM1	1942.97	1888.7	1997.25	1.11071	0.151483	0.7849	0.309478	0.913117
chr2	129023054	129076171	-	HS6ST1	797.3	772.15	822.45	1.09966	0.137056	0.7816	0.311795	0.913395
chr2	113779668	113810444	-	IL36B	1285.25	1298.1	1272.4	1.16183	0.216404	0.7816	0.311795	0.913395
chrX	118370208	118378429	+	PGRMC1	21374.8	21393.3	21356.3	1.14798	0.199092	0.7806	0.312498	0.913479
chr2	161993466	162092683	+	TANK	8657.25	8138.55	9175.95	1.12524	0.170238	0.7791	0.313554	0.913606
chr15	44038590	44064804	+	PDIA3	93537.7	82642.6	104433	1.22507	0.292867	0.777	0.315036	0.913782
chr16	2259254	2261069	-	BRICD5	34133.5	32771.1	35496	1.14339	0.193321	0.7763	0.315531	0.913841
chr17	37844337	37884915	+	ERBB2	1218.62	1183.1	1254.15	1.08763	0.121186	0.7759	0.315813	0.913874
chr1	1146706	1149548	-	TNFRSF4	4270.5	3087.65	5453.35	1.24608	0.317393	0.775	0.31645	0.91395
chr18	59992520	60054943	+	TNFRSF11A	5437.7	5197.55	5677.85	1.10407	0.142827	0.775	0.31645	0.91395
chr3	54156693	55108584	+	CACNA2D3	1132.95	1090.65	1175.25	1.0909	0.125514	0.7746	0.316733	0.913983
chr1	154377669	154441926	+	IL6R	1032.3	1008.35	1056.25	1.09308	0.1284	0.7742	0.317016	0.914016
chr14	24028772	24037045	-	AP1G2	627.2	586.95	667.45	1.08437	0.116858	0.7717	0.318788	0.914225
chr6	52656178	52668664	-	GSTA1	2364.05	2239	2489.1	1.09308	0.1284	0.7715	0.31893	0.914242
chr12	9301436	9360966	-	PZP	686.6	649.55	723.65	1.08112	0.11253	0.7708	0.319427	0.9143
chr10	104183002	104192423	-	CUEDC2	1881.5	1798.65	1964.35	1.08437	0.116858	0.7705	0.31964	0.914325
chr22	37257030	37274059	+	NCF4	2884.35	2705.2	3063.5	1.08763	0.121186	0.7697	0.320209	0.914392
chr2	219745255	219758651	+	WNT10A	3014.85	2637.6	3392.1	1.11182	0.152926	0.7696	0.32028	0.9144
chr3	3108008	3152058	-	IL5RA	1024.08	1000.3	1047.85	1.08329	0.115416	0.7694	0.320422	0.914417
chr15	41028086	41047458	-	RMDN3	1453.35	1411.4	1495.3	1.10517	0.14427	0.7684	0.321134	0.9145
chr8	144898514	144911556	-	PUF60	96995	89214.4	104776	1.08437	0.116858	0.7662	0.322701	0.914683
chr4	17488016	17513857	-	QDPR	101131	93689.2	108573	1.14454	0.194764	0.7659	0.322915	0.914708
chr15	79724858	79764642	+	KIAA1024	1562.05	1500.9	1623.2	1.13088	0.177451	0.764	0.324272	0.914865
chr4	76942269	76944689	-	CXCL10	850.4	819.6	881.2	1.10738	0.147155	0.7617	0.325917	0.915056
chr13	111364970	111373421	+	ING1	5867.18	5779.15	5955.2	1.07358	0.102431	0.7615	0.32606	0.915072
chr1	110230418	110236367	+	GSTM1	1037.95	978.2	1097.7	1.11851	0.161582	0.7599	0.327207	0.915204
chr4	3443726	3451213	+	HGFAC	1348.03	1266.5	1429.55	1.12075	0.164467	0.7588	0.327996	0.915295
chr1	20246800	20250110	-	PLA2G2E	1557.67	1511	1604.35	1.07358	0.102431	0.7562	0.329865	0.915508
chr11	118175295	118186890	+	CD3E	2908.28	2858.3	2958.25	1.09417	0.129843	0.7559	0.330081	0.915533
chr8	66556888	66622798	+	MTFR1	2872.5	2722.4	3022.6	1.10517	0.14427	0.7534	0.331881	0.915738
chr19	51815102	51834102	+	IGLON5	1531.78	1488.35	1575.2	1.08546	0.118301	0.7531	0.332098	0.915762
chr20	56223448	56286592	-	PMEPA1	3680.1	3553.9	3806.3	1.07037	0.0981033	0.7531	0.332098	0.915762
chr11	124617370	124622109	-	VSIG2	72345.7	63275.6	81415.9	1.15951	0.213519	0.7524	0.332603	0.915819
chr11	18501858	18548503	-	TSG101	32368.4	30005.2	34731.7	1.08546	0.118301	0.7511	0.333542	0.915926
chr19	51994481	52005043	-	SIGLEC12	19946.8	18246.2	21647.3	1.09856	0.135613	0.7495	0.334698	0.916056
chr15	49115934	49255641	-	SHC4	4467.65	3349.25	5586.05	1.2214	0.288539	0.7492	0.334915	0.91608
chr2	3642422	3692234	+	COLEC11	1151.6	1130.3	1172.9	1.09527	0.131285	0.7488	0.335205	0.916113
chr5	140552202	140555957	+	PCDHB7	3088.68	2883.45	3293.9	1.09308	0.1284	0.7469	0.336581	0.916267
chr11	12399026	12556903	+	PARVA	69333.9	67279.4	71388.3	1.10076	0.138499	0.7465	0.336871	0.9163
chr1	7975931	8003225	-	TNFRSF9	612.375	590	634.75	1.08654	0.119744	0.7435	0.339049	0.916542
chr9	94484878	94712444	-	ROR2	1819.6	1736.15	1903.05	1.08872	0.122629	0.7422	0.339995	0.916647
chr22	36134783	36424585	-	RBFOX2	9272.08	8319	10225.1	1.19006	0.251029	0.7412	0.340723	0.916728
chr22	50691331	50700089	-	MAPK12	25077.8	24521.9	25633.8	1.10628	0.145712	0.7403	0.341378	0.9168
chr11	133938820	134021652	+	JAM3	2657.88	2484.4	2831.35	1.12075	0.164467	0.7392	0.34218	0.916889
chr4	68424446	68472616	+	STAP1	5512.68	5096.05	5929.3	1.11851	0.161582	0.7382	0.342909	0.916969
chr1	110453233	110473616	+	CSF1	5119.65	4917.05	5322.25	1.11405	0.155811	0.7379	0.343128	0.916993
chr14	95047706	95059457	+	SERPINA5	4082.07	3777.55	4386.6	1.10517	0.14427	0.7378	0.343201	0.917001
chr11	34460472	34493607	+	CAT	8294.5	8276.75	8312.25	1.15488	0.207748	0.7357	0.344736	0.917169
chr13	24883716	24896669	+	C1QTNF9	13447.9	12992.8	13903	1.08763	0.121186	0.735	0.345248	0.917225
chr19	14142552	14163717	+	IL27RA	1453.75	1407.25	1500.25	1.07466	0.103874	0.7304	0.348619	0.917591
chr16	730115	732768	+	STUB1	18770.3	18530.9	19009.8	1.14454	0.194764	0.7304	0.348619	0.917591
chr8	22022653	22069840	+	BMP1	566.375	554.9	577.85	1.07573	0.105317	0.7287	0.349867	0.917726
chr3	186288465	186303589	+	DNAJB11	35812.1	35531.2	36093	1.16416	0.21929	0.7284	0.350088	0.91775
chr12	121416549	121440314	+	HNF1A	1289.17	1023.85	1554.5	1.31785	0.398184	0.7249	0.352663	0.918026
chr6	33043703	33057473	+	HLA-DPB1	6600.1	6458.25	6741.95	1.07573	0.105317	0.7239	0.353401	0.918104
chrX	1455509	1501582	+	IL3RA	745.6	690.4	800.8	1.08872	0.122629	0.7236	0.353622	0.918128
chr1	94027343	94312706	-	BCAR3	8051.82	7947.35	8156.3	1.06823	0.0952179	0.723	0.354064	0.918175
chr1	167510251	167523056	-	CREG1	19502.8	17319.8	21685.8	1.2214	0.288539	0.7223	0.354581	0.91823
chr10	72972292	73062635	+	UNC5B	509.3	464.95	553.65	1.09308	0.1284	0.7218	0.35495	0.918269
chr14	77940738	77965210	-	ISM2	3227.22	3018.65	3435.8	1.08004	0.111088	0.7214	0.355245	0.9183
chr19	12786531	12792701	-	DHPS	643.675	509.2	778.15	1.16067	0.214962	0.7204	0.355984	0.918378
chr20	44637547	44645200	+	MMP9	2121.45	2105.45	2137.45	1.11071	0.151483	0.7185	0.357389	0.918527
chrX	76709647	76712013	+	FGF16	1228.78	1157.95	1299.6	1.11963	0.163025	0.7179	0.357833	0.918573
chr1	9352941	9429590	+	SPSB1	4439.18	4290.2	4588.15	1.10517	0.14427	0.7177	0.357981	0.918589
chr5	132196874	132202576	-	GDF9	2107.7	2033.65	2181.75	1.06716	0.0937752	0.717	0.3585	0.918643
chr19	10677138	10679655	-	CDKN2D	1955.62	1927.9	1983.35	1.06503	0.0908898	0.7155	0.359611	0.91876
chr14	94770585	94789688	-	SERPINA6	12019.9	11792	12247.9	1.07251	0.100989	0.7148	0.360131	0.918814
chr17	4901243	4931694	+	KIF1C	1951.05	1887.25	2014.85	1.07681	0.106759	0.713	0.361466	0.918953
chr20	62271058	62284963	-	STMN3	6047.85	6192.2	5903.5	1.18412	0.243815	0.7119	0.362284	0.919038
chr2	68405989	68479651	-	PPP3R1	53743.2	52213.8	55272.6	1.07144	0.099546	0.7114	0.362655	0.919076
chr2	207024318	207027653	+	EEF1B2	1283.35	1244.05	1322.65	1.10849	0.148598	0.7114	0.362655	0.919076
chr1	178818670	178840215	-	ANGPTL1	929.25	895	963.5	1.07466	0.103874	0.7109	0.363027	0.919115
chr19	44047464	44079730	-	XRCC1	528.725	493.8	563.65	1.09417	0.129843	0.7078	0.365334	0.919353
chrX	151903228	151909518	+	CSAG1	580.625	557.7	603.55	1.08112	0.11253	0.7076	0.365483	0.919368
chr4	71457975	71473004	+	AMBN	2277.53	2236.35	2318.7	1.07573	0.105317	0.7076	0.365483	0.919368
chr4	74902312	74904490	-	CXCL3	11892	11576.6	12207.4	1.08872	0.122629	0.7067	0.366154	0.919437
chr16	2069521	2070756	+	NPW	880.575	847.55	913.6	1.08329	0.115416	0.7064	0.366377	0.91946
chr15	63334838	63364113	+	TPM1	2864.53	2718.6	3010.45	1.07573	0.105317	0.7061	0.366601	0.919482
chr2	112812800	112876895	+	TMEM87B	19473.8	18467.2	20480.5	1.0822	0.113973	0.7055	0.367048	0.919528
chr22	43088127	43116876	-	A4GALT	852.35	831.45	873.25	1.06823	0.0952179	0.705	0.367421	0.919566
chr20	29956421	29961705	+	DEFB118	1091.55	1089.75	1093.35	1.0822	0.113973	0.7047	0.367645	0.919589
chr7	122341720	122343021	-	RNF148	1421.05	1385.3	1456.8	1.08654	0.119744	0.7031	0.36884	0.919711
chr1	244571794	244615436	-	ADSS	10012.2	9104.75	10919.7	1.17117	0.227946	0.7023	0.369438	0.919771
chr8	146277824	146281416	+	C8orf33	1123.15	1082.85	1163.45	1.08872	0.122629	0.7004	0.370858	0.919915
chr13	46700058	46756459	-	LCP1	1801.53	1722.85	1880.2	1.10076	0.138499	0.6999	0.371232	0.919953
chr8	27727399	27850369	-	SCARA5	1044.12	1011.15	1077.1	1.07251	0.100989	0.6997	0.371382	0.919968
chr5	140855569	140892544	+	PCDHGC3	16618.2	16319.2	16917.2	1.0693	0.0966606	0.6993	0.371681	0.919998
chr2	183698005	183731498	-	FRZB	1505.78	1479.3	1532.25	1.08872	0.122629	0.6953	0.374679	0.920298
chr6	31582994	31584798	+	AIF1	8045.62	7608.75	8482.5	1.07358	0.102431	0.6949	0.374979	0.920328
chr14	95027757	95036250	+	SERPINA4	1768.97	1709.2	1828.75	1.07573	0.105317	0.6932	0.376255	0.920455
chr19	10225690	10230599	-	EIF3G	90866.3	92025.9	89706.6	1.10517	0.14427	0.6916	0.377457	0.920574
chr3	102153859	102198685	+	ZPLD1	1805.5	1767.4	1843.6	1.07681	0.106759	0.6898	0.37881	0.920707
chr12	105197275	105322472	-	SLC41A2	2335.68	2235.4	2435.95	1.06396	0.0894471	0.6898	0.37881	0.920707
chr21	46825097	46933634	+	COL18A1	769.025	752.2	785.85	1.08112	0.11253	0.6897	0.378885	0.920715
chr1	46016455	46035723	+	AKR1A1	81436.4	74771.9	88101.1	1.14225	0.191878	0.6884	0.379864	0.920811
chr19	55851221	55859489	+	SUV420H2	2865.3	2749	2981.6	1.06503	0.0908898	0.6873	0.380692	0.920892
chr12	7023614	7032859	+	ENO2	7234.68	6724.7	7744.65	1.1853	0.245258	0.6867	0.381144	0.920936
chr16	29802034	29816706	+	KIF22	24286.9	23867.2	24706.5	1.09966	0.137056	0.6864	0.38137	0.920958
chr20	33104189	33128762	+	DYNLRB1	27112.2	25272.7	28951.8	1.16883	0.22506	0.6858	0.381822	0.921002
chr13	66876966	67804468	-	PCDH9	741.825	701	782.65	1.08112	0.11253	0.6857	0.381897	0.92101
chr1	107682629	108024475	+	NTNG1	1677.62	1674.45	1680.8	1.07144	0.099546	0.6834	0.383632	0.921178
chr14	23369854	23388396	-	RBM23	30292	28455.5	32128.5	1.08004	0.111088	0.683	0.383934	0.921207
chr1	113162075	113214241	+	CAPZA1	167570	156886	178254	1.21046	0.275555	0.6825	0.384311	0.921244
chr17	1665259	1680859	+	SERPINF1	3371.45	2649.65	4093.25	1.41765	0.503501	0.6821	0.384613	0.921273
chr8	7286416	7740180	-	DEFB103A	1096.05	1081.1	1111	1.08004	0.111088	0.6821	0.384613	0.921273
chr12	11460015	11463369	-	PRB4	2675.78	2552.55	2799	1.0822	0.113973	0.6815	0.385066	0.921317
chr9	114312002	114362135	-	PTGR1	11088.4	10879.5	11297.2	1.16649	0.222175	0.6811	0.385368	0.921346
chr9	95176527	95186836	-	OMD	890	742.65	1037.35	1.11293	0.154368	0.6809	0.385519	0.92136
chr2	170655322	170668571	+	SSB	29523.1	28302	30744.2	1.14111	0.190436	0.6806	0.385746	0.921382
chr7	75956108	75988342	-	YWHAG	59843.7	57147.3	62540.1	1.08763	0.121186	0.6806	0.385746	0.921382
chr11	72003470	72145724	-	CLPB	1184.1	1049.45	1318.75	1.09636	0.132728	0.679	0.386955	0.921498
chr1	75171172	75199092	-	CRYZ	16801.8	14820.1	18783.5	1.20804	0.272669	0.6745	0.39036	0.921822
chr14	105675623	105781914	-	BRF1	16205.3	15588.1	16822.5	1.07037	0.0981033	0.6734	0.391193	0.921901
chr16	25123047	25189551	+	LCMT1	10650.6	10298.4	11002.9	1.0629	0.0880044	0.6732	0.391345	0.921915
chr5	54320107	54329960	+	GZMK	412.95	405.1	420.8	1.08112	0.11253	0.6729	0.391572	0.921937
chr9	131314837	131395944	+	SPTAN1	1003.17	1010.6	995.75	1.10186	0.139941	0.6721	0.392179	0.921994
chr19	39818999	39826726	-	GMFG	20834.1	19223.5	22444.8	1.23368	0.302966	0.672	0.392255	0.922001
chr2	9346894	9545812	+	ASAP2	55178.8	51775.9	58581.7	1.08763	0.121186	0.6709	0.393089	0.922079
chr6	34433838	34503000	+	PACSIN1	3786.5	3824.75	3748.25	1.12412	0.168795	0.6693	0.394303	0.922193
chrX	107288200	107322414	+	VSIG1	2337.5	2227.65	2447.35	1.08329	0.115416	0.6685	0.39491	0.92225
chr2	136545415	136594750	-	LCT	744.55	713.4	775.7	1.0909	0.125514	0.6667	0.396277	0.922377
chr2	197669139	197675000	-	C2orf66	832.475	813.1	851.85	1.07573	0.105317	0.6664	0.396505	0.922398
chr12	41086244	41466213	+	CNTN1	375.9	364.85	386.95	1.05654	0.0793482	0.6661	0.396733	0.922419
chr1	8021714	8045342	+	PARK7	7765.68	7428	8103.35	1.24732	0.318836	0.6659	0.396885	0.922433
chr22	41957014	41972670	+	CSDC2	6087.18	5775.2	6399.15	1.0629	0.0880044	0.6649	0.397645	0.922503
chr12	56754355	56756583	-	APOF	710.55	699.25	721.85	1.08329	0.115416	0.6643	0.398101	0.922545
chr5	128430442	128449719	+	ISOC1	7846.77	7475.25	8218.3	1.08112	0.11253	0.6633	0.398861	0.922616
chr12	57031959	57039852	-	ATP5B	3294.62	3172.85	3416.4	1.07144	0.099546	0.6631	0.399013	0.92263
chr16	70413338	70472991	-	ST3GAL2	95282.8	90459.6	100106	1.06609	0.0923325	0.6626	0.399394	0.922664
chr19	51125234	51143092	-	SYT3	2101.4	2011.15	2191.65	1.06823	0.0952179	0.6616	0.400155	0.922734
chr22	42069937	42084913	-	NHP2L1	51988.3	49249.4	54727.2	1.12412	0.168795	0.6599	0.401449	0.922852
chr12	93166285	93323107	-	EEA1	4646.9	4542.65	4751.15	1.07358	0.102431	0.6592	0.401982	0.922901
chr9	102741463	102861330	-	ERP44	22745.4	19948.7	25542	1.13997	0.188993	0.6571	0.403581	0.923046
chr17	77019016	77045870	+	C1QTNF1	66767.5	58445.3	75089.8	1.163	0.217847	0.6551	0.405106	0.923184
chr9	35752988	35754274	-	MSMP	1758	1733.9	1782.1	1.0693	0.0966606	0.6548	0.405335	0.923204
chr2	69172364	69180102	-	GKN2	58.75	56.8	60.7	1.05971	0.0836763	0.6538	0.406097	0.923273
chr17	8108049	8113944	-	AURKB	2977.62	2850.4	3104.85	1.08437	0.116858	0.6538	0.406097	0.923273
chr3	49027341	49044581	+	P4HTM	128.375	110.8	145.95	1.10628	0.145712	0.6532	0.406555	0.923314
chr2	231729313	231743969	+	ITM2C	1015.6	957.9	1073.3	1.07788	0.108202	0.6529	0.406784	0.923334
chr17	38599676	38613982	+	IGFBP4	32095.8	33426.3	30765.2	1.26744	0.341919	0.6521	0.407394	0.923389
chr12	95867822	95909613	+	METAP2	45613.2	45428.3	45798.1	1.07251	0.100989	0.6517	0.4077	0.923416
chr16	67063050	67134958	+	CBFB	10282.3	9766.95	10797.6	1.09856	0.135613	0.6509	0.40831	0.92347
chr21	35736323	35743440	+	KCNE2	1010.52	962.8	1058.25	1.07573	0.105317	0.6503	0.408768	0.923511
chr10	111967363	112047123	+	MXI1	653.875	644.85	662.9	1.07144	0.099546	0.6502	0.408845	0.923518
chr17	42030107	42081837	-	PYY	262.725	256.85	268.6	1.06716	0.0937752	0.6495	0.409379	0.923565
chr8	41119476	41166990	-	SFRP1	343.975	335.7	352.25	1.06078	0.085119	0.6493	0.409532	0.923579
chr12	91497232	91505542	-	LUM	6622.88	4700.55	8545.2	1.33509	0.416939	0.6484	0.410219	0.92364
chr10	73507314	73533337	-	C10orf54	12539	11559.1	13518.8	1.10186	0.139941	0.6483	0.410296	0.923646
chr21	34775202	34809828	+	IFNGR2	1471.8	1447.8	1495.8	1.05971	0.0836763	0.6455	0.412435	0.923835
chr1	168664695	168698442	-	DPT	683.75	652.55	714.95	1.15142	0.20342	0.6455	0.412435	0.923835
chr9	6215786	6257983	+	IL33	511.825	480.45	543.2	1.0693	0.0966606	0.642	0.415112	0.924068
chr15	80445233	80478924	+	FAH	8294.8	7661.1	8928.5	1.09746	0.134171	0.6413	0.415647	0.924114
chr1	29563028	29653325	+	PTPRU	457.175	449.85	464.5	1.12975	0.176009	0.6402	0.416489	0.924187
chr15	52121825	52204331	+	TMOD3	67062.2	62136.4	71988.1	1.10186	0.139941	0.6401	0.416566	0.924194
chr17	79825597	79829282	-	ARHGDIA	5150.85	5060.7	5241	1.0822	0.113973	0.6386	0.417714	0.924293
chr19	18893583	18902114	-	COMP	749.9	711.4	788.4	1.06823	0.0952179	0.6384	0.417867	0.924306
chr15	78556487	78574538	+	DNAJA4	46887.3	45065.9	48708.8	1.09527	0.131285	0.6354	0.420164	0.924502
chr10	71029756	71161637	+	HK1	6844.52	6518.45	7170.6	1.06184	0.0865617	0.6352	0.420317	0.924515
chr17	45000486	45018733	+	GOSR2	1223.25	1157.2	1289.3	1.07573	0.105317	0.6328	0.422156	0.924671
chr6	7881483	7911047	-	TXNDC5	134095	122156	146034	1.09417	0.129843	0.6325	0.422386	0.924691
chr4	88896802	88904563	+	SPP1	1806.45	1765.35	1847.55	1.05971	0.0836763	0.6312	0.423382	0.924775
chr12	49483206	49488602	-	DHH	588.85	564.7	613	1.06823	0.0952179	0.6306	0.423842	0.924814
chr16	29882480	29910585	-	SEZ6L2	978.325	908.8	1047.85	1.08872	0.122629	0.6301	0.424225	0.924846
chr19	49866987	49878373	+	DKKL1	30320.2	29810.6	30829.9	1.0576	0.0807909	0.6286	0.425375	0.924942
chr1	86046444	86049648	+	CYR61	22233.5	21265.8	23201.2	1.09308	0.1284	0.6268	0.426755	0.925057
chr1	159887897	159895332	-	TAGLN2	83563	81905	85221.1	1.18887	0.249586	0.6265	0.426985	0.925076
chr16	75237994	75241072	-	CTRB2	435.275	430	440.55	1.07251	0.100989	0.626	0.427368	0.925108
chr8	7327830	7698764	-	DEFB104A	459.375	455.4	463.35	1.08112	0.11253	0.6259	0.427445	0.925114
chr20	17594323	17662928	-	RRBP1	16534	13913.4	19154.7	1.4993	0.584291	0.625	0.428135	0.925172
chr11	27515965	27528326	-	LIN7C	3728.4	3649.6	3807.2	1.06609	0.0923325	0.6223	0.430207	0.925342
chr9	21350317	21350886	-	IFNA6	2436.88	2377.45	2496.3	1.08546	0.118301	0.6215	0.43082	0.925392
chr19	41836436	41859838	-	TGFB1	4389.98	4315.35	4464.6	1.07358	0.102431	0.6197	0.432201	0.925505
chr12	28111017	28124916	-	PTHLH	1133.62	1091.5	1175.75	1.06396	0.0894471	0.6194	0.432432	0.925524
chrX	99839790	99854882	+	TNMD	3717.93	3602.7	3833.15	1.07037	0.0981033	0.6165	0.434657	0.925704
chr11	118004092	118023630	-	SCN4B	2449.05	2293.1	2605	1.07144	0.099546	0.6163	0.434811	0.925716
chr7	54819940	54826939	-	SEC61G	622.375	607.7	637.05	1.0629	0.0880044	0.6158	0.435194	0.925747
chrX	136112307	136113833	-	GPR101	2193.15	2054.45	2331.85	1.06078	0.085119	0.6155	0.435425	0.925766
chr1	161274525	161279762	-	MPZ	2261.55	2184.5	2338.6	1.05866	0.0822336	0.615	0.435808	0.925797
chr21	47518033	47552763	+	COL6A2	736.375	660.7	812.05	1.07466	0.103874	0.6147	0.436039	0.925815
chr16	84853587	84943116	+	CRISPLD2	2221.93	2104.85	2339	1.20202	0.265456	0.613	0.437343	0.925919
chr17	40253422	40264751	-	DHX58	1648.5	1585.5	1711.5	1.05443	0.0764628	0.6121	0.438034	0.925974
chr1	153940315	153946840	+	CREB3L4	790.45	779.45	801.45	1.06503	0.0908898	0.6103	0.439416	0.926084
chr1	1682671	1711508	-	NADK	1199.15	1046.15	1352.15	1.1572	0.210633	0.6087	0.440644	0.926181
chr18	649620	658340	-	TYMSOS	8716.85	8332.25	9101.45	1.07358	0.102431	0.6059	0.442793	0.92635
chr8	99114567	99129418	-	HRSP12	6575.85	6641.8	6509.9	1.11293	0.154368	0.6055	0.4431	0.926374
chr14	94749650	94759608	-	SERPINA10	1221.28	1193.25	1249.3	1.0576	0.0807909	0.6041	0.444175	0.926457
chr21	45553494	45565605	+	C21orf33	974.525	951.55	997.5	1.06716	0.0937752	0.6016	0.446094	0.926605
chr1	209848670	209849735	+	G0S2	701.375	667.4	735.35	1.0693	0.0966606	0.6013	0.446324	0.926623
chr10	70587294	70655209	+	STOX1	768.925	763.2	774.65	1.0576	0.0807909	0.5998	0.447475	0.926712
chr20	43850010	43853099	+	SEMG2	1768.28	1742.5	1794.05	1.07896	0.109645	0.5994	0.447782	0.926735
chr6	31913721	31919861	+	CFB	267.65	252.7	282.6	1.0629	0.0880044	0.599	0.448089	0.926759
chr4	93225550	94695706	+	GRID2	1800.67	1716.55	1884.8	1.08112	0.11253	0.599	0.448089	0.926759
chr19	36347810	36358048	+	KIRREL2	1286.95	1290.6	1283.3	1.06078	0.085119	0.5989	0.448166	0.926764
chr5	140011313	140013286	-	CD14	3317.18	3231.6	3402.75	1.05232	0.0735774	0.5936	0.452232	0.927072
chr3	51928892	51937386	-	IQCF1	846.15	818.45	873.85	1.05548	0.0779055	0.5933	0.452462	0.92709
chr9	71939488	72007370	+	FAM189A2	2594.38	2551.25	2637.5	1.08654	0.119744	0.5922	0.453306	0.927153
chr15	52043758	52108558	+	TMOD2	1169.3	1126.15	1212.45	1.11628	0.158696	0.5918	0.453612	0.927176
chr12	53894705	53900215	+	TARBP2	5485.07	5354.1	5616.05	1.06396	0.0894471	0.5913	0.453996	0.927204
chr19	35988119	36004560	-	DMKN	4295.43	4291.55	4299.3	1.07144	0.099546	0.5896	0.455299	0.927301
chr9	21206180	21207142	-	IFNA10	1070.72	1061.9	1079.55	1.06078	0.085119	0.5886	0.456066	0.927358
chr18	6941743	7117813	-	LAMA1	347.575	336.6	358.55	1.07144	0.099546	0.5876	0.456832	0.927415
chr1	213031597	213072705	+	FLVCR1	859.125	790.45	927.8	1.10296	0.141384	0.5872	0.457139	0.927437
chr11	117015000	117048889	+	PAFAH1B2	7918.68	7341.5	8495.85	1.1275	0.173123	0.5864	0.457752	0.927482
chr4	83343717	83351378	-	HNRNPDL	187527	169851	205203	1.21774	0.284211	0.5843	0.459361	0.9276
chr16	87425801	87438380	+	MAP1LC3B	161978	155353	168602	1.08546	0.118301	0.5837	0.459821	0.927633
chr12	20522179	20837041	+	PDE3A	6540.88	6291.65	6790.1	1.07788	0.108202	0.5794	0.463113	0.927871
chr2	60983365	61029221	+	PAPOLG	3801.18	3615.7	3986.65	1.0822	0.113973	0.5767	0.465179	0.928018
chr11	115044345	115375241	-	CADM1	682.975	674.45	691.5	1.06716	0.0937752	0.5765	0.465332	0.928029
chr19	6531010	6535939	+	TNFSF9	5998.23	5589.2	6407.25	1.09199	0.126957	0.5752	0.466327	0.9281
chr7	150782918	150841523	+	AGAP3	1702.55	1662.15	1742.95	1.05443	0.0764628	0.5741	0.467168	0.928159
chr17	13399006	13505244	-	HS3ST3A1	19366.3	19023.3	19709.4	1.09417	0.129843	0.5713	0.469308	0.928309
chr20	30532758	30539883	-	PDRG1	24065.6	23397	24734.2	1.05971	0.0836763	0.5708	0.46969	0.928336
chr8	143822362	143823829	-	SLURP1	2365.75	2303.2	2428.3	1.0693	0.0966606	0.5688	0.471218	0.928442
chr3	68040734	68594771	+	FAM19A1	1048.5	936.25	1160.75	1.07037	0.0981033	0.5678	0.471981	0.928494
chr18	10454625	10488698	+	APCDD1	2938.18	2870.95	3005.4	1.0576	0.0807909	0.5668	0.472744	0.928547
chrX	152760347	152775004	+	BGN	1749.03	1669.3	1828.75	1.07251	0.100989	0.5644	0.474575	0.928672
chr2	162999379	163008914	-	GCG	945.45	950.1	940.8	1.06184	0.0865617	0.5643	0.474652	0.928677
chr10	5005454	5020158	+	AKR1C1	600.325	569.8	630.85	1.07681	0.106759	0.5635	0.475262	0.928719
chr5	140186659	140391929	+	PCDHA4	1230.47	1179	1281.95	1.05654	0.0793482	0.5629	0.475719	0.92875
chr12	10524952	10542653	-	KLRK1	1234.97	1214.3	1255.65	1.06078	0.085119	0.5629	0.475719	0.92875
chr5	137588069	137610253	-	GFRA3	4561.93	4437.45	4686.4	1.06396	0.0894471	0.5627	0.475872	0.92876
chr4	74702273	74704477	+	CXCL6	300.8	277.15	324.45	1.06716	0.0937752	0.5615	0.476786	0.928822
chrX	105277190	105282718	-	SERPINA7	1154.78	1115.95	1193.6	1.05548	0.0779055	0.5607	0.477396	0.928863
chr5	126626456	126796910	+	MEGF10	4781.48	4524.5	5038.45	1.07144	0.099546	0.5601	0.477853	0.928893
chr13	25670276	25672704	+	PABPC3	77206.6	74936.7	79476.5	1.07251	0.100989	0.5598	0.478081	0.928909
chr1	203148059	203155922	-	CHI3L1	634.45	589.55	679.35	1.05971	0.0836763	0.5596	0.478234	0.928919
chr1	17300999	17308081	-	MFAP2	828.925	755.3	902.55	1.12862	0.174566	0.5596	0.478234	0.928919
chr8	100890223	100906242	-	COX6C	19478.3	19099.8	19856.8	1.05866	0.0822336	0.5593	0.478462	0.928934
chr1	112016604	112021134	+	C1orf162	1186.38	1147.6	1225.15	1.04917	0.0692494	0.5589	0.478767	0.928954
chrX	99929489	99987135	-	SYTL4	4962.12	4840.85	5083.4	1.12862	0.174566	0.5587	0.478919	0.928965
chr4	76954840	76957350	-	CXCL11	130.675	126.8	134.55	1.0693	0.0966606	0.5586	0.478995	0.92897
chr16	84328312	84363457	+	WFDC1	86.4	86.65	86.15	1.09746	0.134171	0.558	0.479452	0.929
chr1	155916630	155948336	-	ARHGEF2	2792.15	2739.3	2845	1.05022	0.0706921	0.5575	0.479832	0.929025
chr6	158530536	158589312	-	SERAC1	3075.18	2994.85	3155.5	1.05127	0.0721348	0.5574	0.479908	0.929031
chr10	104433484	104474190	-	ARL3	11275.6	10627.5	11923.8	1.10076	0.138499	0.5565	0.480593	0.929076
chr19	43225794	43244668	-	PSG3	5669.93	5359.45	5980.4	1.24857	0.320278	0.5558	0.481126	0.929111
chr22	51017387	51021428	-	CHKB	22904.9	22714.3	23095.5	1.06078	0.085119	0.5555	0.481354	0.929126
chr19	49564397	49567124	-	NTF4	674.575	671.95	677.2	1.0576	0.0807909	0.5552	0.481582	0.929141
chr13	31774112	31906411	+	B3GALTL	2299.2	2265.7	2332.7	1.06823	0.0952179	0.5549	0.48181	0.929156
chr4	100817407	100867883	-	DNAJB14	1544.28	1479.65	1608.9	1.05127	0.0721348	0.5533	0.483026	0.929236
chrX	150151763	150159248	+	HMGB3	31326.5	30092.3	32560.7	1.10076	0.138499	0.5533	0.483026	0.929236
chr14	95078714	95090390	+	SERPINA3	543.8	507.2	580.4	1.06609	0.0923325	0.5533	0.483026	0.929236
chr19	52022784	52035110	-	SIGLEC6	387.25	380.1	394.4	1.0576	0.0807909	0.5531	0.483178	0.929246
chr12	109015680	109027670	-	SELPLG	3809.07	3699.65	3918.5	1.06396	0.0894471	0.553	0.483254	0.929251
chr17	47676246	47755525	-	SPOP	1858.12	1830.65	1885.6	1.06184	0.0865617	0.5529	0.48333	0.929256
chr5	150480267	150537443	-	ANXA6	12486.4	11936.2	13036.5	1.12975	0.176009	0.5508	0.484925	0.92936
chr14	65472819	65569413	-	MAX	26777.5	25567.9	27987	1.07037	0.0981033	0.5499	0.485609	0.929404
chr8	90769975	90803292	+	RIPK2	975.1	962.75	987.45	1.06078	0.085119	0.5498	0.485685	0.929409
chr21	17102344	17252390	+	USP25	1598.22	1531.65	1664.8	1.05443	0.0764628	0.5482	0.486898	0.929487
chr22	31003070	31023047	+	TCN2	1027.67	1020.1	1035.25	1.05127	0.0721348	0.5467	0.488036	0.92956
chr5	132209358	132210582	+	LEAP2	307.475	300.55	314.4	1.05022	0.0706921	0.5448	0.489476	0.929651
chr14	63779549	63785593	-	GPHB5	1839.28	1789.8	1888.75	1.07466	0.103874	0.5441	0.490006	0.929685
chr6	126660935	126804466	+	CENPW	1329.83	1293.55	1366.1	1.07466	0.103874	0.5426	0.491141	0.929756
chr5	96096514	96149848	-	ERAP1	1733.5	1666.35	1800.65	1.07896	0.109645	0.5415	0.491973	0.929808
chr19	35645625	35660788	+	FXYD5	460.775	427.85	493.7	1.07681	0.106759	0.5412	0.4922	0.929823
chr3	185632358	185655924	-	TRA2B	123935	115059	132810	1.07466	0.103874	0.5373	0.495147	0.930005
chr12	112451152	112461024	+	ERP29	124386	111954	136818	1.10296	0.141384	0.5372	0.495223	0.93001
chr9	72658497	72841888	+	MAMDC2	2467.47	2437	2497.95	1.07573	0.105317	0.536	0.496128	0.930066
chr2	101086944	101099742	+	NMS	2895.1	2851.4	2938.8	1.04707	0.066364	0.5355	0.496506	0.930089
chr20	1422807	1448337	-	NSFL1C	909.775	920.5	899.05	1.07466	0.103874	0.5354	0.496581	0.930093
chr10	14560556	14816896	-	FAM107B	1971.55	1897.6	2045.5	1.06078	0.085119	0.5352	0.496732	0.930103
chr7	73588706	73611429	+	EIF4H	133026	124565	141488	1.0693	0.0966606	0.5325	0.498767	0.930226
chrX	20168029	20284750	-	RPS6KA3	940.6	853.7	1027.5	1.13202	0.178894	0.5313	0.499671	0.930281
chr6	150385743	150390202	-	ULBP3	543.175	529.8	556.55	1.05866	0.0822336	0.5311	0.499821	0.93029
chr22	26921714	26986089	-	TPST2	1396.17	1377.95	1414.4	1.07037	0.0981033	0.5306	0.500197	0.930312
chr17	40703984	40707232	+	HSD17B1	7980.3	7792.65	8167.95	1.05971	0.0836763	0.5296	0.50095	0.930357
chr19	58125830	58133636	+	ZNF134	445.375	444.75	446	1.0576	0.0807909	0.528	0.502153	0.930429
chr4	1160721	1202750	-	SPON2	550.95	550.95	550.95	1.09746	0.134171	0.5279	0.502228	0.930433
chr14	24630422	24635774	+	IRF9	1755.58	1625.95	1885.2	1.06823	0.0952179	0.5272	0.502754	0.930464
chr17	3566187	3571973	-	TAX1BP3	70558.1	72138.6	68977.6	1.08872	0.122629	0.5269	0.502979	0.930478
chr10	30598730	30638267	-	MTPAP	2661.78	2586.6	2736.95	1.04603	0.0649213	0.5265	0.503279	0.930495
chr12	68642025	68647281	-	IL22	1427.9	1410.3	1445.5	1.05654	0.0793482	0.526	0.503655	0.930518
chr13	73282495	73301938	-	MZT1	1127.9	1099.85	1155.95	1.05127	0.0721348	0.5251	0.50433	0.930557
chr2	74685527	74688018	+	WBP1	801.325	768.95	833.7	1.05127	0.0721348	0.523	0.505905	0.930649
chr1	47799469	47844511	+	CMPK1	23824.2	23163.3	24485	1.05338	0.0750201	0.5224	0.506355	0.930675
chr5	55230925	55290821	-	IL6ST	4683.98	4474	4893.95	1.0693	0.0966606	0.5218	0.506804	0.930701
chr6	30710976	30712327	-	IER3	3716.35	3624.65	3808.05	1.04289	0.0605932	0.5209	0.507478	0.93074
chr17	56160780	56167618	+	DYNLL2	163808	161117	166498	1.0629	0.0880044	0.5193	0.508676	0.930809
chr7	73095248	73097781	-	DNAJC30	18026.9	17241.6	18812.2	1.06184	0.0865617	0.5184	0.509348	0.930847
chr6	161768590	163148834	-	PARK2	2826.65	2725.15	2928.15	1.05232	0.0735774	0.5183	0.509423	0.930851
chr1	11249346	11256038	+	ANGPTL7	3335.88	3251.25	3420.5	1.05971	0.0836763	0.5173	0.510171	0.930894
chr19	827831	832017	+	AZU1	529.075	508.25	549.9	1.05548	0.0779055	0.5171	0.51032	0.930902
chr21	47401663	47424963	+	COL6A1	10605.6	7389.7	13821.5	1.21531	0.281326	0.5153	0.511664	0.930978
chr3	50304990	50314602	+	SEMA3B	1760.53	1682.35	1838.7	1.04812	0.0678067	0.5148	0.512037	0.930999
chr17	40341105	40346550	-	GHDC	1218.58	1163.5	1273.65	1.05443	0.0764628	0.5129	0.513453	0.931078
chr2	111395275	111435684	-	BUB1	2052.2	1991.05	2113.35	1.08329	0.115416	0.5127	0.513602	0.931087
chr17	7093210	7123369	-	DLG4	1262.15	1235.5	1288.8	1.05548	0.0779055	0.5125	0.513751	0.931095
chr10	90750288	90775542	+	FAS	4840.95	4567.05	5114.85	1.10296	0.141384	0.5121	0.514049	0.931111
chr3	186560463	186576252	+	ADIPOQ	1097.83	1100.2	1095.45	1.08329	0.115416	0.512	0.514124	0.931115
chr15	64388083	64436433	+	SNX1	32629.8	31583.3	33676.2	1.05548	0.0779055	0.5118	0.514273	0.931124
chr19	36936021	36980463	-	ZNF566	1635.75	1613.7	1657.8	1.06716	0.0937752	0.5115	0.514496	0.931136
chr17	48912605	48919709	+	WFIKKN2	3472.28	3398.95	3545.6	1.05127	0.0721348	0.5112	0.514719	0.931148
chr8	63927639	63951610	-	GGH	8275.88	7674.45	8877.3	1.06823	0.0952179	0.5105	0.51524	0.931177
chr12	103981069	104160502	+	STAB2	5281.27	5193.55	5369	1.05127	0.0721348	0.5104	0.515315	0.931181
chr1	44398992	44402912	+	ARTN	838.025	835.6	840.45	1.06716	0.0937752	0.5092	0.516207	0.93123
chr2	86066271	86116157	-	ST3GAL5	756.4	732.9	779.9	1.0576	0.0807909	0.5052	0.519177	0.931391
chr6	110745892	110797844	-	SLC22A16	74884.2	72665.1	77103.2	1.05232	0.0735774	0.5051	0.519251	0.931395
chr5	54273695	54281414	-	ESM1	1651.78	1644.5	1659.05	1.05443	0.0764628	0.5044	0.51977	0.931423
chrX	130192216	130223859	+	ARHGAP36	20682.5	20159.2	21205.8	1.07144	0.099546	0.5037	0.520288	0.931451
chr6	31847536	31865484	-	EHMT2	3252.1	3187.35	3316.85	1.04603	0.0649213	0.5035	0.520437	0.931459
chr12	49726200	49730971	-	C1QL4	1936.75	1923.75	1949.75	1.04917	0.0692494	0.5031	0.520733	0.931474
chr19	58637695	58662148	-	ZNF329	947.675	947.55	947.8	1.0576	0.0807909	0.5026	0.521103	0.931494
chr3	2140550	3099645	+	CNTN4	4212.65	4110.65	4314.65	1.04707	0.066364	0.5021	0.521473	0.931514
chr19	40221893	40228669	-	CLC	1645.1	1600.75	1689.45	1.04812	0.0678067	0.5017	0.521769	0.931529
chr9	79000433	79009444	-	RFK	4386.55	4081.15	4691.95	1.09199	0.126957	0.5015	0.521917	0.931537
chr7	27778992	27869386	+	TAX1BP1	2137.15	2097	2177.3	1.04812	0.0678067	0.5005	0.522656	0.931576
chr22	21128383	21142008	+	SERPIND1	266.675	260.8	272.55	1.04185	0.0591505	0.4999	0.523099	0.931599
chr10	89264223	89313218	+	MINPP1	36184.5	35540.8	36828.2	1.0576	0.0807909	0.4997	0.523247	0.931607
chr17	47572655	47592382	+	NGFR	1418.72	1347.5	1489.95	1.05127	0.0721348	0.499	0.523764	0.931634
chr19	50452250	50464429	-	SIGLEC11	19281.1	18445.8	20116.4	1.07144	0.099546	0.498	0.524502	0.931673
chr13	46627322	46679211	-	CPB2	1267.55	1247.6	1287.5	1.05654	0.0793482	0.4965	0.525608	0.93173
chr2	1635659	1748291	-	PXDN	1773.75	1698.9	1848.6	1.04917	0.0692494	0.4964	0.525682	0.931734
chr15	65673825	65715410	-	IGDCC4	288.275	279.45	297.1	1.04917	0.0692494	0.4957	0.526198	0.93176
chr4	110834040	110934118	+	EGF	1447.22	1422.75	1471.7	1.05022	0.0706921	0.4957	0.526198	0.93176
chr17	1537152	1549083	-	SCARF1	1350.25	1348.6	1351.9	1.06503	0.0908898	0.4955	0.526345	0.931768
chr3	128338813	128369719	-	RPN1	4354.75	4326.75	4382.75	1.04917	0.0692494	0.4955	0.526345	0.931768
chr19	54754270	54761167	-	LILRB5	1975.17	1913.2	2037.15	1.05127	0.0721348	0.4939	0.527523	0.931828
chr1	156005092	156023516	-	UBQLN4	60713.9	58405.1	63022.7	1.0693	0.0966606	0.4934	0.527891	0.931847
chr4	96083656	96470361	-	UNC5C	586.075	590.65	581.5	1.04917	0.0692494	0.4933	0.527964	0.931851
chrX	115567747	115592625	+	SLC6A14	3987.22	3819.75	4154.7	1.04394	0.0620359	0.4926	0.528479	0.931877
chr17	31318882	31324892	+	SPACA3	5980	5844.65	6115.35	1.05022	0.0706921	0.4922	0.528773	0.931891
chr1	67632169	67725650	+	IL23R	1295.88	1244.8	1346.95	1.06078	0.085119	0.4918	0.529067	0.931906
chr1	151104163	151119140	-	SEMA6C	356.7	354.95	358.45	1.04289	0.0605932	0.4916	0.529213	0.931914
chr19	56347944	56393220	+	NLRP4	1598.33	1583.25	1613.4	1.05232	0.0735774	0.4915	0.529287	0.931917
chr6	24126414	24147757	+	NRSN1	11482	11305.8	11658.2	1.05443	0.0764628	0.4912	0.529507	0.931928
chr1	68511645	68516460	-	DIRAS3	2877.9	2854.2	2901.6	1.05127	0.0721348	0.4906	0.529948	0.931951
chr10	123237844	123357972	-	FGFR2	682.575	684.2	680.95	1.06396	0.0894471	0.4902	0.530241	0.931965
chr11	32112477	32127272	+	RCN1	70223.6	68121.9	72325.4	1.08654	0.119744	0.4901	0.530314	0.931969
chr6	39071840	39082865	-	SAYSD1	2476.6	2468.95	2484.25	1.06184	0.0865617	0.4894	0.530828	0.931995
chr2	96991062	96994091	+	ITPRIPL1	12273.7	11195.6	13351.9	1.06823	0.0952179	0.4889	0.531194	0.932013
chr3	10327434	10334631	-	GHRL	1534.67	1497.55	1571.8	1.05654	0.0793482	0.488	0.531854	0.932045
chr1	15783223	15798586	+	CELA2A	4355.7	4316.25	4395.15	1.05548	0.0779055	0.488	0.531854	0.932045
chr6	153019030	153045715	+	MYCT1	2994.57	2859.3	3129.85	1.06609	0.0923325	0.4859	0.533391	0.932121
chr2	25383722	25391559	-	POMC	1111.78	1107.1	1116.45	1.05654	0.0793482	0.4858	0.533464	0.932125
chr17	16842398	16875402	-	TNFRSF13B	1201.58	1183	1220.15	1.04812	0.0678067	0.4843	0.53456	0.932178
chr2	27593363	27600400	+	SNX17	6603.15	6353.5	6852.8	1.04289	0.0605932	0.4843	0.53456	0.932178
chr22	21903736	21978323	+	UBE2L3	1950.47	1912.05	1988.9	1.05443	0.0764628	0.4843	0.53456	0.932178
chr12	53585102	53601091	-	ITGB7	24939.7	24353.8	25525.7	1.05971	0.0836763	0.4831	0.535436	0.93222
chr15	57884102	57977562	+	MYZAP	336.975	330.3	343.65	1.05548	0.0779055	0.4829	0.535582	0.932227
chr1	169659806	169680843	-	SELL	10875.1	10718.1	11032.2	1.0576	0.0807909	0.4829	0.535582	0.932227
chr17	27895739	27900175	+	TP53I13	1229.47	1211.9	1247.05	1.05127	0.0721348	0.4823	0.536019	0.932249
chr20	168527	170264	-	DEFB128	2792.6	2695.75	2889.45	1.04394	0.0620359	0.4803	0.537476	0.932318
chr2	85884440	85895864	-	SFTPB	678.225	665.95	690.5	1.04185	0.0591505	0.4802	0.537549	0.932322
chr1	150480487	150486265	+	ECM1	39132.8	37241.2	41024.3	1.08763	0.121186	0.4796	0.537986	0.932342
chr1	145438438	145442628	+	TXNIP	4223.85	4126.9	4320.8	1.04081	0.0577078	0.4795	0.538059	0.932346
chr1	204159469	204165619	-	KISS1	18302.2	17817.8	18786.5	1.04917	0.0692494	0.4779	0.539222	0.9324
chr3	49924436	49941306	-	MST1R	1499.45	1460.55	1538.35	1.04812	0.0678067	0.4771	0.539803	0.932428
chr15	77905369	77924709	-	LINGO1	3364.62	3247.85	3481.4	1.05127	0.0721348	0.4768	0.540021	0.932438
chr1	226548392	226595801	-	PARP1	2101.05	1951.4	2250.7	1.05548	0.0779055	0.4765	0.540238	0.932448
chr11	78364328	79151695	-	TENM4	1203.97	1129.75	1278.2	1.09308	0.1284	0.4738	0.542196	0.932538
chr7	71244476	71877360	-	CALN1	1670.88	1635.55	1706.2	1.06503	0.0908898	0.4724	0.543209	0.932585
chr19	46522412	46526556	-	PGLYRP1	255.4	246.7	264.1	1.04394	0.0620359	0.4724	0.543209	0.932585
chr5	157212751	157286183	-	CLINT1	33377.6	32774.3	33980.8	1.05654	0.0793482	0.4724	0.543209	0.932585
chr2	88991176	89050452	+	RPIA	4566.32	4373.85	4758.8	1.05232	0.0735774	0.4706	0.54451	0.932644
chr14	21423630	21424594	+	RNASE2	2008.53	1987.45	2029.6	1.04498	0.0634786	0.4704	0.544654	0.93265
chr4	15779931	15850706	+	CD38	791.275	784.1	798.45	1.0576	0.0807909	0.4695	0.545304	0.932679
chr12	9220304	9268558	-	A2M	478.1	464.05	492.15	1.04707	0.066364	0.4687	0.545881	0.932705
chr17	35732985	35749662	+	C17orf78	1153.3	1149.7	1156.9	1.0576	0.0807909	0.4665	0.547465	0.932775
chr6	106534195	106557814	+	PRDM1	3347.5	3254.5	3440.5	1.04394	0.0620359	0.4663	0.547609	0.932781
chr11	63871362	63886645	+	FLRT1	5755.43	5494.7	6016.15	1.04603	0.0649213	0.466	0.547825	0.932791
chr12	102789645	102874378	-	IGF1	3674.7	3530.25	3819.15	1.04917	0.0692494	0.4638	0.549405	0.93286
chr12	91357456	91398803	-	EPYC	990.475	840.75	1140.2	1.16649	0.222175	0.4638	0.549405	0.93286
chr5	131396347	131398896	+	IL3	6049.4	5850.25	6248.55	1.05127	0.0721348	0.4633	0.549764	0.932875
chr2	27070969	27173219	+	DPYSL5	1539.53	1490.1	1588.95	1.04081	0.0577078	0.4633	0.549764	0.932875
chr7	6414126	6443598	+	RAC1	104852	100697	109007	1.07466	0.103874	0.4631	0.549908	0.932881
chrX	27826107	27841131	+	MAGEB10	1389.25	1362.65	1415.85	1.05338	0.0750201	0.4631	0.549908	0.932881
chr5	82934017	83016896	-	HAPLN1	2026.88	2174.8	1878.95	1.17234	0.229389	0.4628	0.550123	0.932891
chr19	17982782	18005983	+	SLC5A5	3537.82	3472.2	3603.45	1.04707	0.066364	0.4616	0.550983	0.932927
chr16	2587965	2653191	+	PDPK1	272.275	260.85	283.7	1.09966	0.137056	0.4613	0.551198	0.932937
chr3	49396579	49449526	-	RHOA	161797	158188	165406	1.07788	0.108202	0.4606	0.551699	0.932958
chr19	9577031	9609279	-	ZNF560	1137.03	1118	1156.05	1.04081	0.0577078	0.4597	0.552343	0.932985
chr1	2522081	2564481	-	MMEL1	6051.6	6085.1	6018.1	1.05127	0.0721348	0.4591	0.552772	0.933003
chr12	69244956	69357020	-	CPM	7071.3	7019.3	7123.3	1.07681	0.106759	0.4591	0.552772	0.933003
chr15	65488337	65503840	-	CILP	57273	55396.3	59149.7	1.04603	0.0649213	0.4583	0.553343	0.933027
chr11	11984543	12030917	-	DKK3	6013.12	5739.6	6286.65	1.06503	0.0908898	0.4581	0.553486	0.933033
chr3	160473996	160788817	+	PPM1L	761.1	717.95	804.25	1.04603	0.0649213	0.4565	0.554628	0.933081
chr18	721592	812327	-	YES1	10380.9	9884.3	10877.4	1.05971	0.0836763	0.4561	0.554913	0.933092
chr6	31082865	31088252	-	CDSN	1199.33	1131.2	1267.45	1.05232	0.0735774	0.456	0.554984	0.933095
chr10	129347613	129350935	+	NPS	1289.4	1266.75	1312.05	1.05654	0.0793482	0.455	0.555696	0.933124
chr1	149754250	149764074	+	FCGR1A	941.85	900.6	983.1	1.05866	0.0822336	0.4543	0.556195	0.933145
chr14	91337167	91526993	-	RPS6KA5	171.725	163.7	179.75	1.05338	0.0750201	0.4538	0.55655	0.933159
chr11	117070040	117075508	+	TAGLN	190947	178600	203295	1.07681	0.106759	0.4536	0.556692	0.933165
chr5	140729828	140892546	+	PCDHGB1	2505.78	2547.3	2464.25	1.07466	0.103874	0.4528	0.557261	0.933188
chr1	6052358	6161253	+	KCNAB2	1280.6	1264.9	1296.3	1.04289	0.0605932	0.4523	0.557616	0.933202
chr14	25042724	25045466	-	CTSG	2650.88	2549.75	2752	1.05866	0.0822336	0.452	0.557829	0.933211
chr12	10559983	10562356	-	KLRC4	1863.35	1830.55	1896.15	1.04498	0.0634786	0.4515	0.558184	0.933225
chrX	47483612	47489704	-	CFP	689.075	687.65	690.5	1.05127	0.0721348	0.4504	0.558964	0.933256
chr4	155504280	155511897	-	FGA	458.125	442.75	473.5	1.04498	0.0634786	0.45	0.559248	0.933267
chr2	183580768	183644750	+	DNAJC10	2360.78	2199.9	2521.65	1.14912	0.200535	0.4486	0.560239	0.933306
chr2	241499471	241503431	+	DUSP28	1048.97	1043.25	1054.7	1.04081	0.0577078	0.448	0.560663	0.933323
chr17	38249037	38256978	-	NR1D1	1571.1	1552.55	1589.65	1.06078	0.085119	0.4477	0.560875	0.933331
chr22	26887894	26908437	-	TFIP11	3204.25	3083.95	3324.55	1.04185	0.0591505	0.4474	0.561087	0.93334
chr9	139933909	139940676	-	NPDC1	998.025	951.7	1044.35	1.05338	0.0750201	0.4472	0.561229	0.933345
chr8	33448854	33457439	-	DUSP26	12299.6	12258.9	12340.2	1.05022	0.0706921	0.4453	0.56257	0.933397
chr1	120336641	120354203	-	REG4	690.025	665.7	714.35	1.03977	0.0562651	0.4447	0.562993	0.933413
chr3	238279	451097	+	CHL1	2277.22	2309.4	2245.05	1.05654	0.0793482	0.4439	0.563557	0.933434
chrX	47441690	47446190	+	TIMP1	43326.7	36491.6	50161.8	1.12412	0.168795	0.4431	0.56412	0.933456
chr2	127805599	127864903	-	BIN1	6747.7	6358.6	7136.8	1.06609	0.0923325	0.4428	0.564331	0.933464
chr8	86240458	86290383	-	CA1	3418.38	3443.5	3393.25	1.05127	0.0721348	0.4421	0.564823	0.933482
chr17	64298926	64806862	+	PRKCA	10456.7	10633.1	10280.3	1.14683	0.197649	0.4417	0.565104	0.933493
chr16	58497549	58547523	+	NDRG4	8790.73	8719.85	8861.6	1.04289	0.0605932	0.441	0.565596	0.933511
chr5	106712590	107006596	-	EFNA5	774.3	750.85	797.75	1.04081	0.0577078	0.4406	0.565877	0.933521
chr4	100737981	100791346	+	DAPP1	467.25	432.4	502.1	1.04917	0.0692494	0.4399	0.566368	0.93354
chr16	2762423	2770552	-	PRSS27	34108.2	33973.6	34242.9	1.04081	0.0577078	0.4393	0.566788	0.933555
chr21	27011594	27089874	+	JAM2	6091.15	5868.9	6313.4	1.04081	0.0577078	0.4388	0.567139	0.933568
chr8	22877648	22926700	-	TNFRSF10B	1308.08	1283.75	1332.4	1.0576	0.0807909	0.4384	0.567419	0.933578
chr2	190920426	190927455	-	MSTN	9031.52	9030.1	9032.95	1.05232	0.0735774	0.4383	0.567489	0.933581
chr11	17373309	17398868	+	NCR3LG1	1554.9	1514.2	1595.6	1.03977	0.0562651	0.4381	0.567629	0.933586
chr19	7733972	7735340	+	RETN	1420.45	1412.15	1428.75	1.04185	0.0591505	0.4379	0.567769	0.933591
chr19	3474405	3480540	-	SMIM24	1243.22	1188.25	1298.2	1.04603	0.0649213	0.4377	0.567909	0.933596
chr2	225334867	225450114	-	CUL3	3122.03	3110.1	3133.95	1.05127	0.0721348	0.4368	0.568539	0.933619
chr6	86317502	86353043	-	SYNCRIP	20562.6	18947.8	22177.4	1.07466	0.103874	0.4368	0.568539	0.933619
chr14	23775971	23780968	+	BCL2L2	876.35	852.05	900.65	1.04603	0.0649213	0.4362	0.568958	0.933634
chr16	81812863	81996298	+	PLCG2	708.35	700.25	716.45	1.05127	0.0721348	0.4359	0.569167	0.933641
chr3	195295573	195311076	-	APOD	14316	14188.1	14443.8	1.04081	0.0577078	0.435	0.569796	0.933663
chr1	155829260	155854990	+	SYT11	1155.03	1176.1	1133.95	1.05127	0.0721348	0.4349	0.569866	0.933666
chr5	52776264	52782304	+	FST	1328.47	1314.4	1342.55	1.04498	0.0634786	0.4349	0.569866	0.933666
chr8	91013580	91064227	+	DECR1	1656.6	1583.05	1730.15	1.07573	0.105317	0.434	0.570493	0.933688
chr6	35744371	35747329	+	CLPSL2	1941	1928.95	1953.05	1.04917	0.0692494	0.4338	0.570633	0.933693
chr3	35680666	35835988	+	ARPP21	1256.47	1218.25	1294.7	1.0576	0.0807909	0.4337	0.570702	0.933695
chr9	91975706	92094611	-	SEMA4D	1005	995.8	1014.2	1.05443	0.0764628	0.4327	0.571399	0.93372
chrX	53458206	53461323	-	HSD17B10	2645	2494.85	2795.15	1.08437	0.116858	0.4321	0.571816	0.933734
chr11	117075787	117103241	-	PCSK7	995.6	963.05	1028.15	1.04812	0.0678067	0.4307	0.572789	0.933768
chr20	31571581	31592239	-	SUN5	783.15	742.85	823.45	1.03977	0.0562651	0.4302	0.573137	0.93378
chr1	202300785	202311094	-	UBE2T	19318.2	17761.5	20874.8	1.17	0.226503	0.4295	0.573622	0.933796
chr4	71226493	71232823	+	SMR3A	3051.4	3059.6	3043.2	1.05866	0.0822336	0.4289	0.574039	0.93381
chr3	9975524	9987097	+	CRELD1	1107.5	1099.15	1115.85	1.04289	0.0605932	0.4288	0.574108	0.933813
chr9	133589268	133763062	+	ABL1	706.825	687.95	725.7	1.05022	0.0706921	0.4286	0.574246	0.933817
chr13	21714653	21723224	+	SAP18	27014.5	23987.9	30041.2	1.09856	0.135613	0.4281	0.574593	0.933829
chr4	76932333	77033955	+	ART3	2599.82	2549.35	2650.3	1.03458	0.0490516	0.4274	0.575078	0.933845
chr2	106709759	106810795	-	UXS1	1760.12	1711.4	1808.85	1.04394	0.0620359	0.4266	0.575631	0.933863
chr19	544034	549920	+	GZMM	940.775	940.4	941.15	1.04707	0.066364	0.4259	0.576115	0.933879
chr22	17659680	17702744	-	CECR1	1431.38	1433.55	1429.2	1.05022	0.0706921	0.4256	0.576322	0.933886
chr11	20691097	21597229	+	NELL1	920.175	925.1	915.25	1.05022	0.0706921	0.4252	0.576598	0.933895
chr4	70894130	70902255	+	HTN3	1274.22	1233.85	1314.6	1.06078	0.085119	0.4245	0.577082	0.933911
chr12	113796371	113827458	+	PLBD2	5311.93	5158.3	5465.55	1.04081	0.0577078	0.4237	0.577633	0.933929
chr3	58619670	58652561	-	FAM3D	1069	1039.05	1098.95	1.03977	0.0562651	0.4228	0.578253	0.933949
chr3	120347015	120401418	-	HGD	1016.9	1012.95	1020.85	1.04603	0.0649213	0.4225	0.57846	0.933955
chr19	10444452	10450345	-	ICAM3	1665.88	1604.95	1726.8	1.05232	0.0735774	0.4217	0.57901	0.933973
chr5	31193762	31329253	+	CDH6	10789.4	10636.2	10942.5	1.0576	0.0807909	0.4205	0.579835	0.933999
chr20	43738093	43743813	-	WFDC5	518.075	503.35	532.8	1.03873	0.0548224	0.4201	0.58011	0.934007
chr20	57570242	57582309	-	CTSZ	2179.2	2092.5	2265.9	1.03666	0.051937	0.4194	0.58059	0.934022
chr17	11880762	11900689	-	ZNF18	8702.48	8195.4	9209.55	1.05443	0.0764628	0.418	0.58155	0.934052
chr2	103035250	103069024	+	IL18RAP	627.675	610.85	644.5	1.03769	0.0533797	0.4179	0.581618	0.934054
chr2	196998307	197036336	-	STK17B	14127.4	13807.1	14447.8	1.04185	0.0591505	0.4176	0.581824	0.93406
chrX	129757357	130037291	-	ENOX2	7792.32	7768.65	7816	1.03562	0.0504943	0.4166	0.582508	0.934081
chr7	142552776	142568847	+	EPHB6	506.6	499.55	513.65	1.04081	0.0577078	0.4165	0.582576	0.934083
chr19	33072094	33078358	+	PDCD5	103351	95927.1	110775	1.06396	0.0894471	0.4154	0.583328	0.934105
chr7	99816871	99819111	+	PVRIG	4396.02	4313.35	4478.7	1.04707	0.066364	0.4153	0.583396	0.934107
chr9	75766781	75785307	+	ANXA1	121963	120404	123522	1.08872	0.122629	0.4147	0.583806	0.93412
chr7	99971068	99997722	+	PILRA	2176.88	2186.1	2167.65	1.04081	0.0577078	0.4124	0.585373	0.934165
chr16	2039946	2044276	+	SYNGR3	1394.67	1371.85	1417.5	1.04289	0.0605932	0.4115	0.585985	0.934183
chr16	58035277	58055527	+	USB1	475.725	462.95	488.5	1.03666	0.051937	0.4114	0.586053	0.934185
chr3	57124010	57199403	-	IL17RD	798.15	796.9	799.4	1.04394	0.0620359	0.4107	0.586528	0.934199
chr1	38181646	38230824	-	EPHA10	16291.2	15935.4	16647	1.05443	0.0764628	0.4104	0.586732	0.934204
chr21	34697214	34732128	+	IFNAR1	1794.78	1769.85	1819.7	1.03873	0.0548224	0.4091	0.587614	0.934229
chr12	133707214	133736049	+	ZNF10	22411.1	22089.7	22732.5	1.06609	0.0923325	0.4091	0.587614	0.934229
chr16	72118756	72128215	-	TXNL4B	404.025	386.85	421.2	1.05127	0.0721348	0.407	0.589036	0.934268
chr1	36931644	36948915	-	CSF3R	4432.32	4328.5	4536.15	1.07358	0.102431	0.4056	0.589981	0.934294
chr12	10365489	10375724	+	GABARAPL1	126192	129216	123167	1.06396	0.0894471	0.4055	0.590049	0.934296
chr5	82373317	82649579	+	XRCC4	9124.55	8791.15	9457.95	1.05232	0.0735774	0.4055	0.590049	0.934296
chr8	11839830	11842099	+	DEFB135	1896.97	1834.9	1959.05	1.04498	0.0634786	0.4055	0.590049	0.934296
chrY	16097652	16168838	-	VCY	1414.65	1389.25	1440.05	1.04603	0.0649213	0.4046	0.590656	0.934312
chr9	86595637	86618987	+	RMI1	4268.18	4304.25	4232.1	1.05232	0.0735774	0.4044	0.590791	0.934315
chr1	21543740	21672034	-	ECE1	10765.6	10825.4	10705.8	1.04394	0.0620359	0.4036	0.59133	0.93433
chr11	68451983	68458643	+	GAL	30847.7	29848.8	31846.5	1.04289	0.0605932	0.4017	0.592608	0.934363
chr19	39574945	39602128	+	PAPL	374.65	379.15	370.15	1.03666	0.051937	0.401	0.593078	0.934375
chr2	128175996	128186822	+	PROC	1911.05	1823.8	1998.3	1.05971	0.0836763	0.3996	0.594017	0.934398
chr4	121956782	121993673	-	NDNF	3493.03	3496.4	3489.65	1.05443	0.0764628	0.3996	0.594017	0.934398
chr17	26694299	26697373	-	VTN	33796.1	33204.1	34388.2	1.03562	0.0504943	0.3992	0.594285	0.934405
chr19	7753643	7767032	-	FCER2	3546.68	3535.4	3557.95	1.03149	0.0447235	0.3986	0.594687	0.934415
chr15	48623621	48635570	+	DUT	105910	106162	105657	1.07037	0.0981033	0.3983	0.594887	0.93442
chr3	113557681	113666021	+	GRAMD1C	990.225	972.5	1007.95	1.03355	0.0476089	0.3979	0.595155	0.934426
chr1	205012340	205047171	+	CNTN2	1141.88	1098.85	1184.9	1.04289	0.0605932	0.3979	0.595155	0.934426
chr14	55308724	55369542	-	GCH1	1434.22	1393.05	1475.4	1.03873	0.0548224	0.3972	0.595623	0.934438
chr17	80278900	80291921	-	SECTM1	9721.75	9616.2	9827.3	1.03355	0.0476089	0.3967	0.595957	0.934446
chr3	69134090	69155239	+	ARL6IP5	5625.4	5394.05	5856.75	1.06716	0.0937752	0.3963	0.596224	0.934452
chr3	48348336	48369831	-	SPINK8	1253.88	1272.7	1235.05	1.04812	0.0678067	0.3963	0.596224	0.934452
chr16	84254741	84273356	-	KCNG4	4292.62	4208.45	4376.8	1.04498	0.0634786	0.3963	0.596224	0.934452
chr14	74946643	74960084	-	NPC2	16994.5	16585.5	17403.3	1.15258	0.204863	0.3955	0.596758	0.934465
chr3	98514814	98620533	-	DCBLD2	3018.38	2905	3131.75	1.12524	0.170238	0.395	0.597091	0.934473
chr3	159706623	159713806	+	IL12A	1153.6	1133.4	1173.8	1.03977	0.0562651	0.3946	0.597357	0.934479
chr12	101988709	102079658	+	MYBPC1	2343.05	2306.85	2379.25	1.04917	0.0692494	0.3941	0.59769	0.934487
chr5	52084136	52249485	+	ITGA1	109250	109675	108825	1.07037	0.0981033	0.3931	0.598355	0.934502
chr17	61678231	61685725	+	TACO1	27957.5	28399	27516	1.0629	0.0880044	0.3931	0.598355	0.934502
chr15	66839806	66858317	-	LCTL	2631.88	2596.05	2667.7	1.04498	0.0634786	0.3929	0.598488	0.934505
chr17	1646130	1658559	+	SERPINF2	766.725	774.6	758.85	1.04394	0.0620359	0.3929	0.598488	0.934505
chr7	83587659	83824217	-	SEMA3A	980.75	967.15	994.35	1.03562	0.0504943	0.3917	0.599285	0.934523
chr16	2286468	2288712	+	DNASE1L2	7913.82	7660.15	8167.5	1.05971	0.0836763	0.3908	0.599882	0.934536
chr4	123747863	123819390	+	FGF2	127625	123012	132238	1.0576	0.0807909	0.3908	0.599882	0.934536
chr14	21498345	21500332	+	TPPP2	6817.88	6717.95	6917.8	1.04917	0.0692494	0.3889	0.60114	0.934564
chr14	103398716	103523742	-	CDC42BPB	11917.5	11906.5	11928.5	1.04917	0.0692494	0.3887	0.601272	0.934567
chr8	89049460	89339717	-	MMP16	5933.18	5953.15	5913.2	1.04289	0.0605932	0.3887	0.601272	0.934567
chr16	2732495	2759031	+	KCTD5	2914.18	2851.3	2977.05	1.03252	0.0461662	0.3881	0.601669	0.934575
chr20	29992648	30000641	-	DEFB121	896.05	881.2	910.9	1.03355	0.0476089	0.3857	0.603252	0.934608
chr6	31462658	31478901	+	MICB	1368.97	1404.15	1333.8	1.04185	0.0591505	0.3848	0.603844	0.93462
chr8	39771328	39786309	+	IDO1	2775.05	2691.85	2858.25	1.04081	0.0577078	0.3845	0.604041	0.934624
chr12	53491436	53496128	+	IGFBP6	10912	11312.4	10511.5	1.09527	0.131285	0.3833	0.60483	0.93464
chr8	23048970	23082680	-	TNFRSF10A	6719.43	6840.7	6598.15	1.05232	0.0735774	0.3829	0.605092	0.934645
chr6	99990263	100016690	-	CCNC	3582	3283.25	3880.75	1.07573	0.105317	0.3827	0.605223	0.934648
chr15	62939510	63136829	+	TLN2	8865.17	8599.9	9130.45	1.05022	0.0706921	0.3818	0.605813	0.934659
chr17	42264354	42269099	+	TMUB2	871.1	837.45	904.75	1.04603	0.0649213	0.3809	0.606403	0.93467
chr10	73855790	73976892	-	ASCC1	24176.8	23546.9	24806.6	1.06184	0.0865617	0.3809	0.606403	0.93467
chr2	136499189	136542633	+	UBXN4	77544.1	72446.9	82641.1	1.05232	0.0735774	0.3808	0.606468	0.934671
chr2	200134223	200335989	-	SATB2	1475.03	1439.9	1510.15	1.03769	0.0533797	0.3808	0.606468	0.934671
chr19	39786965	39789312	+	IFNL1	328.725	307.95	349.5	1.03873	0.0548224	0.3799	0.607057	0.934682
chr5	89811445	89825401	-	LYSMD3	638.8	638.45	639.15	1.03458	0.0490516	0.3791	0.607579	0.934692
chr5	141016517	141020631	+	RELL2	1972.58	1912.25	2032.9	1.03252	0.0461662	0.3787	0.60784	0.934697
chr11	102582526	102595685	-	MMP8	5566.43	5503.35	5629.5	1.03458	0.0490516	0.3785	0.607971	0.934699
chr12	8685901	8693558	-	CLEC4E	1165.85	1140.1	1191.6	1.03355	0.0476089	0.3784	0.608036	0.9347
chr18	29078027	29128814	+	DSG2	496.3	487.55	505.05	1.03252	0.0461662	0.3783	0.608101	0.934701
chr19	39989557	39999121	+	DLL3	1838.25	1836.95	1839.55	1.05443	0.0764628	0.378	0.608297	0.934705
chr2	216225179	216300791	-	FN1	28597.1	27723.5	29470.8	1.06503	0.0908898	0.378	0.608297	0.934705
chr4	113739239	114304896	+	ANK2	2002.35	1955.95	2048.75	1.04812	0.0678067	0.3767	0.609144	0.93472
chrX	68835911	69259321	+	EDA	3075.4	3035.5	3115.3	1.03355	0.0476089	0.3767	0.609144	0.93472
chr2	231921578	232037540	+	PSMD1	1567.45	1496.7	1638.2	1.04812	0.0678067	0.3765	0.609274	0.934722
chr20	23471738	23476655	+	CST8	8431.27	8238.1	8624.45	1.03977	0.0562651	0.3765	0.609274	0.934722
chr6	26402465	26415444	+	BTN3A1	1627.78	1579.15	1676.4	1.03666	0.051937	0.3765	0.609274	0.934722
chr2	238475217	238475818	+	PRLH	3040.32	2924.95	3155.7	1.03562	0.0504943	0.3763	0.609404	0.934724
chr5	134240810	134298336	+	PCBD2	2550	2520.75	2579.25	1.03355	0.0476089	0.3759	0.609664	0.934729
chr17	37560538	37607527	-	MED1	40743.6	39374.9	42112.2	1.03873	0.0548224	0.3748	0.610379	0.934741
chr11	61520121	61555989	+	MYRF	1785.53	1751.35	1819.7	1.03149	0.0447235	0.3744	0.610638	0.934745
chr22	24577444	24585074	+	SUSD2	1585.58	1549	1622.15	1.04185	0.0591505	0.3739	0.610963	0.934751
chr1	228294380	228297013	-	MRPL55	11848.8	11318.7	12379	1.04185	0.0591505	0.3732	0.611416	0.934758
chr4	106816597	106892828	+	NPNT	1876	1806.6	1945.4	1.03458	0.0490516	0.3732	0.611416	0.934758
chr20	3767419	3786768	+	CDC25B	12015.5	11720.4	12310.6	1.03355	0.0476089	0.3731	0.611481	0.934759
chr5	156904312	157002831	-	ADAM19	1054.47	999.9	1109.05	1.03666	0.051937	0.373	0.611546	0.93476
chr20	43803540	43805185	+	PI3	1179.12	1149.8	1208.45	1.03873	0.0548224	0.3725	0.61187	0.934765
chr10	99624757	99790585	-	CRTAC1	1075.92	981.1	1170.75	1.05654	0.0793482	0.3716	0.612452	0.934774
chr2	68269332	68290159	-	C1D	2152.22	2133.1	2171.35	1.03666	0.051937	0.3715	0.612516	0.934775
chr3	186435098	186462199	+	KNG1	1313.8	1296.1	1331.5	1.03666	0.051937	0.3712	0.61271	0.934778
chr7	536897	559481	-	PDGFA	864.375	848.15	880.6	1.04185	0.0591505	0.3692	0.614001	0.934798
chr15	50716574	50793280	+	USP8	12466.9	12049	12884.8	1.06823	0.0952179	0.369	0.61413	0.9348
chr1	193065595	193075244	-	GLRX2	9577.4	9391.65	9763.15	1.07466	0.103874	0.3678	0.614902	0.934811
chr12	51785101	51909547	+	SLC4A8	705.525	710	701.05	1.04081	0.0577078	0.3674	0.615159	0.934815
chr20	46286150	46415360	-	SULF2	30207.9	29353.9	31061.9	1.03977	0.0562651	0.3673	0.615223	0.934816
chr3	118619479	118864898	-	IGSF11	1862.58	1867.1	1858.05	1.03977	0.0562651	0.3671	0.615352	0.934817
chr1	27668483	27680423	+	SYTL1	2093.68	2027.95	2159.4	1.04498	0.0634786	0.3664	0.615801	0.934824
chr1	116915795	116947396	+	ATP1A1	603.025	592.85	613.2	1.03562	0.0504943	0.3663	0.615866	0.934824
chr2	71295408	71305998	+	NAGK	45226.8	44310.3	46143.3	1.07466	0.103874	0.3663	0.615866	0.934824
chr9	113006092	113018920	-	TXN	1098.17	1091.95	1104.4	1.03355	0.0476089	0.3643	0.617147	0.934842
chr10	98102975	98119122	-	OPALIN	2134.65	2105.9	2163.4	1.04917	0.0692494	0.3638	0.617467	0.934846
chr6	64429876	66417118	-	EYS	1010.73	1001.4	1020.05	1.03562	0.0504943	0.3629	0.618043	0.934853
chr13	84451340	84456528	-	SLITRK1	6029.2	6006.85	6051.55	1.04917	0.0692494	0.3624	0.618362	0.934857
chr2	109510927	109605828	-	EDAR	1202.47	1158.65	1246.3	1.03666	0.051937	0.3624	0.618362	0.934857
chr3	52467268	52479043	-	SEMA3G	1140.95	1162.35	1119.55	1.03873	0.0548224	0.3616	0.618872	0.934863
chr7	143088205	143105985	-	EPHA1	4786.62	4761.35	4811.9	1.03769	0.0533797	0.3616	0.618872	0.934863
chr4	159442866	159574521	+	RXFP1	842.475	831.7	853.25	1.03666	0.051937	0.3611	0.619191	0.934867
chr22	40297086	40369346	+	GRAP2	2215.35	2225.9	2204.8	1.04498	0.0634786	0.3607	0.619446	0.93487
chr14	103388993	103397179	+	AMN	357.475	350.15	364.8	1.03252	0.0461662	0.3605	0.619573	0.934871
chr5	43526370	43557521	-	PAIP1	6248.38	6295.8	6200.95	1.08872	0.122629	0.3599	0.619955	0.934876
chr19	11487881	11495018	-	EPOR	482.85	469.05	496.65	1.03149	0.0447235	0.3597	0.620082	0.934877
chr18	43304092	43332485	+	SLC14A1	3922.45	3863.05	3981.85	1.04394	0.0620359	0.358	0.621162	0.934889
chr1	160510884	160549306	-	CD84	6642.68	6792.85	6492.5	1.04289	0.0605932	0.3579	0.621225	0.93489
chr16	72088508	72094955	+	HP	679.725	680.25	679.2	1.03458	0.0490516	0.3578	0.621289	0.93489
chrX	150884508	150891664	+	FATE1	1407.83	1407.95	1407.7	1.03666	0.051937	0.3571	0.621733	0.934895
chr5	140868808	140892546	+	PCDHGC5	637.55	632.8	642.3	1.03355	0.0476089	0.357	0.621796	0.934896
chr5	86690079	86708850	-	CCNH	16838.4	15852	17824.7	1.04603	0.0649213	0.356	0.622429	0.934902
chr5	44305097	44388784	-	FGF10	433.6	438.9	428.3	1.04289	0.0605932	0.3558	0.622556	0.934903
chr1	159557616	159558661	+	APCS	1007.12	999.4	1014.85	1.03873	0.0548224	0.3553	0.622872	0.934906
chr16	3775056	3930121	-	CREBBP	74581.1	72554.2	76607.9	1.05866	0.0822336	0.3552	0.622935	0.934907
chr16	230333	231178	+	HBQ1	45903	44343.8	47462.3	1.03873	0.0548224	0.3552	0.622935	0.934907
chr3	107761941	107809935	-	CD47	1246	1216.75	1275.25	1.03562	0.0504943	0.3546	0.623314	0.934911
chr16	72127615	72146811	+	DHX38	2482.38	2398.6	2566.15	1.03252	0.0461662	0.3546	0.623314	0.934911
chr19	39292311	39303740	-	LGALS4	616.325	610.9	621.75	1.03562	0.0504943	0.3545	0.623377	0.934911
chr1	160648536	160681641	-	CD48	1147.28	1138.75	1155.8	1.03977	0.0562651	0.3543	0.623503	0.934912
chr3	194995465	195163817	-	ACAP2	2484	2403	2565	1.03355	0.0476089	0.3537	0.623882	0.934916
chr18	52495708	52562747	+	RAB27B	3517.62	3400.45	3634.8	1.03458	0.0490516	0.3535	0.624008	0.934917
chr17	7608520	7614693	+	EFNB3	3520.93	3338.45	3703.4	1.06396	0.0894471	0.353	0.624323	0.93492
chr3	49449639	49453909	+	TCTA	414	403.7	424.3	1.03252	0.0461662	0.3528	0.624449	0.934921
chr12	57125364	57146146	-	PRIM1	1467.78	1429.05	1506.5	1.04185	0.0591505	0.3516	0.625204	0.934927
chr14	35747764	35786685	+	PSMA6	1265.47	1247.45	1283.5	1.03666	0.051937	0.3515	0.625267	0.934928
chr11	102641233	102651359	-	MMP10	1016.12	993.85	1038.4	1.04185	0.0591505	0.3513	0.625393	0.934929
chr20	9518037	9819687	-	PAK7	2614.53	2591	2638.05	1.03458	0.0490516	0.3509	0.625644	0.934931
chrX	5808067	6146923	-	NLGN4X	697.4	692.1	702.7	1.03252	0.0461662	0.3492	0.626711	0.934939
chr1	169691781	169703220	-	SELE	2764	2722.45	2805.55	1.03252	0.0461662	0.3488	0.626961	0.934941
chr19	44010871	44031396	-	ETHE1	3923.35	3775.45	4071.25	1.07466	0.103874	0.3471	0.628025	0.934948
chr1	157647978	157670647	-	FCRL3	751.2	744.3	758.1	1.03252	0.0461662	0.3456	0.628961	0.934954
chrX	134290461	134305751	-	CT55	1836.85	1779.5	1894.2	1.03458	0.0490516	0.3456	0.628961	0.934954
chr5	172741726	172756506	-	STC2	1044.42	1046.8	1042.05	1.03458	0.0490516	0.3454	0.629085	0.934955
chr2	27714750	27718126	-	FNDC4	1306.72	1304.1	1309.35	1.03977	0.0562651	0.3453	0.629148	0.934955
chr19	43964946	43969831	-	LYPD3	2044.3	1989.85	2098.75	1.03149	0.0447235	0.3452	0.62921	0.934955
chr11	14526422	14665180	-	PSMA1	4899.62	4762.7	5036.55	1.03149	0.0447235	0.3443	0.62977	0.934958
chr11	125495031	125546150	+	CHEK1	4212.65	4020.55	4404.75	1.03252	0.0461662	0.344	0.629957	0.934959
chr1	155165379	155177772	-	THBS3	1462.88	1446.55	1479.2	1.03252	0.0461662	0.344	0.629957	0.934959
chr19	10461204	10491248	-	TYK2	39663.4	39645.7	39681.1	1.03562	0.0504943	0.3435	0.630268	0.934961
chr3	13357730	13461819	-	NUP210	5309.65	5238.05	5381.25	1.03149	0.0447235	0.3432	0.630454	0.934962
chr20	24929866	24940564	+	CST7	857.175	824.45	889.9	1.04394	0.0620359	0.3431	0.630516	0.934962
chr5	37812779	37839782	-	GDNF	1207.6	1203.35	1211.85	1.03355	0.0476089	0.3427	0.630765	0.934963
chr6	119498366	119670931	-	MAN1A1	874.075	871.15	877	1.03045	0.0432809	0.3423	0.631013	0.934964
chr3	169940220	170023770	+	PRKCI	1979.33	1841.4	2117.25	1.0909	0.125514	0.3413	0.631633	0.934967
chr3	49506136	49573051	+	DAG1	444.05	431.9	456.2	1.04081	0.0577078	0.3405	0.632128	0.934969
chr12	7341759	7371169	+	PEX5	1495.88	1309.75	1682	1.40495	0.490516	0.3395	0.632746	0.934971
chr22	37865101	37882478	-	MFNG	50725.2	48373.3	53077.1	1.09636	0.132728	0.3392	0.632932	0.934972
chr20	47729876	47804904	-	STAU1	48197.6	47819.2	48576.1	1.03252	0.0461662	0.3388	0.633179	0.934973
chr1	12123434	12204264	+	TNFRSF8	3344.72	3271.7	3417.75	1.03355	0.0476089	0.3387	0.63324	0.934973
chr22	37309675	37336479	+	CSF2RB	573.825	561.7	585.95	1.03562	0.0504943	0.3384	0.633425	0.934974
chr4	48137800	48271814	-	TEC	9001.75	8930	9073.5	1.04812	0.0678067	0.3377	0.633857	0.934975
chr20	23856572	23860380	-	CST5	930.9	937.15	924.65	1.03149	0.0447235	0.3364	0.634657	0.934977
chr1	209958968	209979520	-	IRF6	19023.4	18815.3	19231.5	1.04498	0.0634786	0.336	0.634903	0.934977
chr17	4636824	4643223	-	CXCL16	3362.03	3281.05	3443	1.03666	0.051937	0.336	0.634903	0.934977
chr1	196946667	196978803	+	CFHR5	2025.12	1992.95	2057.3	1.03252	0.0461662	0.3359	0.634965	0.934977
chr12	27619743	27655118	+	SMCO2	1904.97	1919.5	1890.45	1.03355	0.0476089	0.3356	0.635149	0.934978
chr2	27994584	28002608	+	MRPL33	2659.25	2674.75	2643.75	1.03666	0.051937	0.3356	0.635149	0.934978
chr12	7282967	7311530	+	CLSTN3	21127.2	20267.8	21986.7	1.03873	0.0548224	0.3347	0.635702	0.934979
chr1	20396701	20418394	+	PLA2G5	637.4	629.9	644.9	1.03769	0.0533797	0.3344	0.635886	0.934979
chr17	16284107	16286059	+	UBB	88969.1	85057.7	92880.6	1.05232	0.0735774	0.3343	0.635947	0.934979
chr11	126293396	126870766	-	KIRREL3	821.65	788.9	854.4	1.05443	0.0764628	0.3342	0.636008	0.934979
chr17	80332201	80333370	+	UTS2R	764.95	783.6	746.3	1.03355	0.0476089	0.3327	0.636927	0.93498
chr4	55944426	55991762	-	KDR	14742.9	14652.6	14833.1	1.03252	0.0461662	0.3315	0.63766	0.93498
chr3	186383747	186396023	+	HRG	1207.5	1178.55	1236.45	1.0284	0.0403955	0.3315	0.63766	0.93498
chr5	134209460	134237323	+	TXNDC15	582	561.1	602.9	1.05654	0.0793482	0.3284	0.639548	0.934979
chr11	10594638	10715535	-	MRVI1	12100.4	12202	11998.7	1.03562	0.0504943	0.3278	0.639913	0.934978
chr20	36531499	36573747	+	VSTM2L	1277.17	1248.95	1305.4	1.0284	0.0403955	0.327	0.640398	0.934977
chr11	119209644	119217383	-	C1QTNF5	1956.03	1118.85	2793.2	1.2263	0.29431	0.3256	0.641247	0.934976
chr21	32490736	32931290	-	TIAM1	494.625	494.25	495	1.03149	0.0447235	0.3253	0.641428	0.934975
chr16	89679716	89704839	+	DPEP1	548.45	554.5	542.4	1.03666	0.051937	0.325	0.641609	0.934975
chr14	21249210	21250626	+	RNASE6	1211.2	1202.7	1219.7	1.03977	0.0562651	0.3249	0.64167	0.934975
chr10	85954391	85979376	+	CDHR1	1740.53	1735.05	1746	1.0284	0.0403955	0.3248	0.64173	0.934974
chr8	38034106	38070819	+	BAG4	721.025	716	726.05	1.02942	0.0418382	0.3246	0.641851	0.934974
chr15	44580909	44707959	+	CASC4	1657.15	1676.65	1637.65	1.04812	0.0678067	0.3218	0.64354	0.934968
chr6	153071932	153080902	+	VIP	388.325	379.5	397.15	1.03045	0.0432809	0.321	0.644021	0.934966
chr1	104097266	104122156	+	AMY2B	1065.33	1059.8	1070.85	1.02634	0.0375101	0.3205	0.644321	0.934965
chr14	21152372	21168761	+	RNASE4	688.15	672.15	704.15	1.02942	0.0418382	0.3205	0.644321	0.934965
chr17	34340096	34345005	-	CCL23	1250.88	1263.25	1238.5	1.04289	0.0605932	0.3203	0.644441	0.934964
chr15	65619465	65670378	-	IGDCC3	1675.67	1651.05	1700.3	1.03666	0.051937	0.3201	0.644561	0.934963
chr11	66615997	66725847	-	PC	718.45	704.75	732.15	1.0284	0.0403955	0.3192	0.645101	0.934961
chr11	60691913	60704631	+	TMEM132A	581.325	567.05	595.6	1.123	0.167353	0.3191	0.645161	0.93496
chr11	122709255	122743347	+	CRTAM	1219.28	1235.1	1203.45	1.04081	0.0577078	0.319	0.645221	0.93496
chr4	74861359	74864446	-	CXCL5	2339.35	2333.95	2344.75	1.03355	0.0476089	0.3188	0.64534	0.934959
chr1	99127236	99226056	+	SNX7	817.375	820.5	814.25	1.03252	0.0461662	0.3183	0.64564	0.934958
chr11	64532076	64546316	-	SF1	63884.6	62365	65404.1	1.03562	0.0504943	0.3168	0.646536	0.934952
chr10	43572517	43625797	+	RET	1717.08	1704.6	1729.55	1.02737	0.0389528	0.3165	0.646715	0.934951
chrX	15579156	15620192	-	ACE2	664.25	659.8	668.7	1.03149	0.0447235	0.316	0.647014	0.934949
chr3	136581050	136670452	+	NCK1	1828.42	1664.6	1992.25	1.03666	0.051937	0.3151	0.64755	0.934945
chr19	54865233	54882163	-	LAIR1	1229.22	1239.55	1218.9	1.03666	0.051937	0.3148	0.647729	0.934944
chr17	8924859	9147317	+	NTN1	261.375	255.6	267.15	1.03355	0.0476089	0.3147	0.647788	0.934943
chr22	50702142	50708822	-	MAPK11	701.625	690.3	712.95	1.02634	0.0375101	0.3146	0.647848	0.934943
chr12	68688346	68726161	-	MDM1	3216.38	3192.45	3240.3	1.02737	0.0389528	0.3145	0.647907	0.934943
chr9	139323067	139334256	-	INPP5E	635.425	634.95	635.9	1.03769	0.0533797	0.3139	0.648264	0.93494
chr17	40118759	40129754	+	CNP	32238.8	33112.2	31365.4	1.04394	0.0620359	0.3135	0.648502	0.934938
chr17	7571720	7590868	-	TP53	25468.1	24773.2	26163	1.04081	0.0577078	0.3121	0.649332	0.934931
chr6	49753364	49755053	-	PGK2	1026.15	1000.1	1052.2	1.02942	0.0418382	0.3117	0.649569	0.934929
chr7	36892511	37488929	-	ELMO1	405.1	399.1	411.1	1.02737	0.0389528	0.309	0.651165	0.934914
chr21	27096791	27107965	-	ATP5J	107839	102624	113054	1.04603	0.0649213	0.3089	0.651224	0.934913
chr14	20937538	20946165	+	PNP	14183.5	13588.9	14778.2	1.0576	0.0807909	0.3087	0.651342	0.934912
chr21	46225532	46238044	-	SUMO3	17552.1	17560.5	17543.8	1.04707	0.066364	0.3081	0.651696	0.934908
chr3	133543080	133614691	-	RAB6B	6439.73	6242.7	6636.75	1.05654	0.0793482	0.3077	0.651931	0.934906
chr2	79740060	80875988	+	CTNNA2	2077.55	2038.8	2116.3	1.03045	0.0432809	0.3073	0.652167	0.934903
chr10	122216466	122349367	+	PPAPDC1A	1568.47	1522.9	1614.05	1.02737	0.0389528	0.3071	0.652285	0.934902
chrX	100604435	100645784	-	BTK	957.7	935.8	979.6	1.03045	0.0432809	0.3068	0.652461	0.9349
chr21	43766467	43771208	-	TFF2	1158.1	1157.6	1158.6	1.0284	0.0403955	0.3061	0.652872	0.934896
chr19	42801185	42806952	-	PAFAH1B3	6316.93	6447.7	6186.15	1.07681	0.106759	0.3055	0.653224	0.934891
chr8	27491577	27534286	+	SCARA3	2657.18	2580.1	2734.25	1.0284	0.0403955	0.3053	0.653342	0.93489
chr5	95997741	96110385	+	CAST	75777.9	71975.8	79579.9	1.04289	0.0605932	0.3053	0.653342	0.93489
chr19	18062111	18109930	+	KCNN1	1482.83	1476.75	1488.9	1.02942	0.0418382	0.3053	0.653342	0.93489
chr12	125811162	126146923	+	TMEM132B	1304.53	1290.8	1318.25	1.02942	0.0418382	0.3052	0.6534	0.934889
chr19	35820069	35838264	+	CD22	2194.62	2131.65	2257.6	1.02942	0.0418382	0.3048	0.653635	0.934887
chr1	92414928	92479985	+	BRDT	1908.7	1895.65	1921.75	1.03562	0.0504943	0.3045	0.65381	0.934884
chr1	27705590	27709823	-	CD164L2	1380.22	1316.3	1444.15	1.03149	0.0447235	0.304	0.654103	0.934881
chr3	108015337	108097131	+	HHLA2	5766.4	5664.25	5868.55	1.02737	0.0389528	0.304	0.654103	0.934881
chr3	110790606	110913016	+	PVRL3	1595.38	1602.65	1588.1	1.0284	0.0403955	0.3023	0.655097	0.934868
chrX	149861869	149933575	+	MTMR1	1124.83	1109.6	1140.05	1.02942	0.0418382	0.3021	0.655213	0.934866
chr8	17433942	17500642	+	PDGFRL	3774.75	3697.75	3851.75	1.03562	0.0504943	0.3	0.656437	0.934849
chr19	55315067	55325972	+	KIR2DL4	950.575	934.8	966.35	1.03873	0.0548224	0.2998	0.656553	0.934848
chr16	1271651	1275254	-	TPSG1	897.25	888.5	906	1.03045	0.0432809	0.2998	0.656553	0.934848
chr11	93754378	93847374	+	HEPHL1	1988.05	1962	2014.1	1.02532	0.0360674	0.2997	0.656611	0.934847
chr4	71248795	71255961	+	SMR3B	464.075	451.55	476.6	1.02634	0.0375101	0.2992	0.656901	0.934842
chr15	90808895	90815443	+	NGRN	1036.05	1010.7	1061.4	1.0284	0.0403955	0.2983	0.657424	0.934835
chr3	3841121	3889387	+	LRRN1	1052.25	1046.6	1057.9	1.03045	0.0432809	0.2983	0.657424	0.934835
chrX	23685645	23704514	+	PRDX4	1475.9	1427.1	1524.7	1.02942	0.0418382	0.2982	0.657482	0.934834
chr7	157331750	158380482	-	PTPRN2	438.05	445.1	431	1.02942	0.0418382	0.2969	0.658235	0.934822
chr18	11981427	12030885	+	IMPA2	1581.58	1569.45	1593.7	1.0284	0.0403955	0.2965	0.658466	0.934818
chr1	11751781	11780336	+	DRAXIN	559.475	562.7	556.25	1.02942	0.0418382	0.2954	0.659102	0.934808
chr11	118064442	118095809	-	AMICA1	1056.83	1054.35	1059.3	1.02429	0.0346247	0.2951	0.659275	0.934805
chr10	54525140	54531460	-	MBL2	1040.5	1025	1056	1.04081	0.0577078	0.295	0.659332	0.934804
chr11	102706528	102714342	-	MMP3	574.85	566.1	583.6	1.02634	0.0375101	0.295	0.659332	0.934804
chr7	107788071	108096841	-	NRCAM	983.1	961.75	1004.45	1.02737	0.0389528	0.2943	0.659736	0.934797
chr5	94994020	95018714	-	SPATA9	6687.98	6698	6677.95	1.02532	0.0360674	0.294	0.659909	0.934794
chr9	34661893	34662689	-	CCL27	1067.4	1071.35	1063.45	1.02737	0.0389528	0.2937	0.660082	0.934791
chr9	21802635	21865969	+	MTAP	17576.6	16898	18255.2	1.03562	0.0504943	0.2932	0.660369	0.934786
chr17	4835592	4838325	+	GP1BA	652.05	662.3	641.8	1.0284	0.0403955	0.2931	0.660427	0.934785
chrX	15363713	15402535	-	FIGF	2005.22	2009.35	2001.1	1.02942	0.0418382	0.2929	0.660542	0.934783
chr1	117057156	117113715	-	CD58	2925.47	2911.55	2939.4	1.02634	0.0375101	0.2918	0.661174	0.934771
chr19	6663148	6670599	-	TNFSF14	1215.72	1215.5	1215.95	1.03149	0.0447235	0.2916	0.661288	0.934769
chr1	101185196	101204601	+	VCAM1	4217.57	4091.5	4343.65	1.02634	0.0375101	0.2915	0.661346	0.934768
chr11	61731757	61735132	-	FTH1	59161.7	47076.8	71246.6	1.08872	0.122629	0.2914	0.661403	0.934767
chr16	23847300	24231932	+	PRKCB	629.05	628.75	629.35	1.04812	0.0678067	0.2912	0.661518	0.934764
chr11	118618473	118661972	-	DDX6	117140	114036	120245	1.03977	0.0562651	0.2909	0.66169	0.934761
chr10	20105372	20578784	+	PLXDC2	403.05	392.05	414.05	1.03458	0.0490516	0.2905	0.661919	0.934757
chr14	20978631	20979281	+	RNASE10	2593.65	2653.55	2533.75	1.02942	0.0418382	0.2903	0.662033	0.934754
chr1	24446261	24469775	-	IL22RA1	2999.15	2980.95	3017.35	1.03666	0.051937	0.2896	0.662434	0.934747
chr5	21750973	22853731	-	CDH12	2742.72	2762.6	2722.85	1.04289	0.0605932	0.2893	0.662605	0.934743
chr22	31477282	31500610	+	SMTN	1726.8	1707.7	1745.9	1.07144	0.099546	0.2889	0.662834	0.934739
chr1	77747662	78025654	+	AK5	1465.88	1474.5	1457.25	1.03045	0.0432809	0.2884	0.663119	0.934733
chr15	99191768	99507759	+	IGF1R	5026.02	4956.05	5096	1.04917	0.0692494	0.2875	0.663633	0.934722
chr13	111973015	111996594	+	TEX29	19249.8	18727.7	19771.9	1.03666	0.051937	0.2861	0.66443	0.934705
chr9	33750464	33799229	+	PRSS3	708	717.55	698.45	1.03045	0.0432809	0.2858	0.6646	0.934702
chr12	6802957	6810009	-	PIANP	1374.05	1379.05	1369.05	1.02532	0.0360674	0.2843	0.665451	0.934683
chr14	38723205	38725575	-	CLEC14A	718.525	715.7	721.35	1.02532	0.0360674	0.2839	0.665678	0.934677
chr2	38970741	38978636	-	SRSF7	128136	119745	136527	1.03873	0.0548224	0.2838	0.665735	0.934676
chr15	41952610	42062141	+	MGA	2281.1	2289.6	2272.6	1.02942	0.0418382	0.2835	0.665905	0.934672
chr17	41831099	41836156	-	SOST	2199.03	2227.4	2170.65	1.03149	0.0447235	0.2833	0.666018	0.93467
chr9	117655623	117692875	-	TNFSF8	1799.65	1761.15	1838.15	1.02634	0.0375101	0.2824	0.666527	0.934658
chr17	48541853	48546227	-	CHAD	389.75	388.9	390.6	1.02634	0.0375101	0.2822	0.66664	0.934655
chr14	21214099	21216539	+	EDDM3A	24160	23576.3	24743.7	1.03769	0.0533797	0.2814	0.667091	0.934644
chr14	23299092	23304246	+	MRPL52	4112.3	4059.3	4165.3	1.02942	0.0418382	0.2803	0.667711	0.934629
chr19	7581004	7585911	+	ZNF358	938.6	933.3	943.9	1.02634	0.0375101	0.28	0.66788	0.934625
chr12	56360553	56366573	+	CDK2	691.025	692.5	689.55	1.09746	0.134171	0.28	0.66788	0.934625
chrX	15645439	15683154	-	TMEM27	417.8	402.2	433.4	1.03252	0.0461662	0.2799	0.667937	0.934623
chr6	149068271	149398126	+	UST	3023.75	3011.55	3035.95	1.0693	0.0966606	0.2791	0.668386	0.934612
chr11	63997753	64001753	+	DNAJC4	1548.65	1538.45	1558.85	1.02532	0.0360674	0.2788	0.668555	0.934608
chr1	201103899	201140710	-	TMEM9	1640.35	1552.75	1727.95	1.04394	0.0620359	0.2786	0.668667	0.934605
chr7	45927959	45933267	+	IGFBP1	435.225	420.1	450.35	1.02737	0.0389528	0.2784	0.66878	0.934602
chr12	53400062	53435993	+	EIF4B	136213	129896	142531	1.03355	0.0476089	0.2783	0.668836	0.9346
chr1	160454820	160493052	-	SLAMF6	407.575	415.9	399.25	1.02942	0.0418382	0.278	0.669004	0.934596
chr12	53342655	53346685	+	KRT18	599.875	588.25	611.5	1.02532	0.0360674	0.2773	0.669397	0.934586
chr4	55095264	55164412	+	PDGFRA	1629.22	1605.95	1652.5	1.02429	0.0346247	0.2772	0.669453	0.934584
chr6	24544332	24646383	-	KIAA0319	1364.5	1330.8	1398.2	1.02634	0.0375101	0.2771	0.669509	0.934583
chr15	91411822	91426688	+	FURIN	8873.92	9086.25	8661.6	1.03045	0.0432809	0.2768	0.669677	0.934578
chr1	42619092	42621495	+	GUCA2B	2620.75	2615.1	2626.4	1.03045	0.0432809	0.2766	0.669789	0.934575
chr1	104198141	104301311	+	AMY1A	1988.4	1973.8	2003	1.02224	0.0317393	0.276	0.670124	0.934566
chr1	173152870	173176471	-	TNFSF4	2205.28	2190.2	2220.35	1.0284	0.0403955	0.2758	0.670236	0.934563
chr10	88516396	88684945	+	BMPR1A	805.4	816.45	794.35	1.03045	0.0432809	0.2756	0.670348	0.93456
chr17	56347217	56358296	-	MPO	742.1	724.35	759.85	1.02942	0.0418382	0.2756	0.670348	0.93456
chr7	142829174	142836834	+	PIP	950.225	955.05	945.4	1.03355	0.0476089	0.275	0.670683	0.934551
chr4	55524095	55606881	+	KIT	6006.57	5780.4	6232.75	1.03355	0.0476089	0.2749	0.670739	0.934549
chr17	62396777	62407083	-	PECAM1	2552.72	2484.75	2620.7	1.0284	0.0403955	0.2746	0.670906	0.934544
chr21	46188495	46221751	-	UBE2G2	21597.6	20645.5	22549.7	1.03252	0.0461662	0.2738	0.671352	0.934532
chr7	108210189	108215294	+	DNAJB9	12579.4	11893.6	13265.2	1.07466	0.103874	0.2737	0.671408	0.93453
chr8	21766384	21771205	-	DOK2	591.975	579.5	604.45	1.02429	0.0346247	0.2724	0.672131	0.934509
chr1	110993788	110999976	+	PROK1	456.325	446.1	466.55	1.02327	0.033182	0.2721	0.672298	0.934504
chr19	54720147	54746711	-	LILRB3	1329.38	1320.1	1338.65	1.03149	0.0447235	0.2721	0.672298	0.934504
chr6	46672053	46703430	-	PLA2G7	3746.72	3639.9	3853.55	1.02942	0.0418382	0.2719	0.672409	0.934501
chr16	82068858	82132139	+	HSD17B2	875.975	889.4	862.55	1.02942	0.0418382	0.269	0.674015	0.934452
chr12	130822433	130856877	+	PIWIL1	719.4	715.9	722.9	1.02634	0.0375101	0.269	0.674015	0.934452
chr3	112051916	112081658	+	CD200	3230.43	3228.7	3232.15	1.03977	0.0562651	0.2688	0.674126	0.934449
chr13	47345391	47371367	-	ESD	10523.5	11820.2	9226.85	1.10628	0.145712	0.2678	0.674678	0.934431
chr1	109656585	109749403	+	KIAA1324	947.325	948.2	946.45	1.02737	0.0389528	0.2674	0.674898	0.934424
chr21	42688661	42729654	+	FAM3B	29062.5	27507.8	30617.3	1.03252	0.0461662	0.2673	0.674953	0.934422
chr3	50649293	50686728	+	MAPKAPK3	5707.62	5384.9	6030.35	1.06609	0.0923325	0.2669	0.675173	0.934415
chr3	132757132	133116619	+	TMEM108	267.6	262.35	272.85	1.02532	0.0360674	0.2668	0.675229	0.934413
chr20	44277202	44298878	-	WFDC11	7044.43	6907.05	7181.8	1.02942	0.0418382	0.2663	0.675504	0.934404
chr8	67088612	67090846	-	CRH	1677.22	1683.3	1671.15	1.02327	0.033182	0.2661	0.675614	0.934401
chr1	161141100	161147758	-	B4GALT3	2243.68	2258.75	2228.6	1.02429	0.0346247	0.266	0.675669	0.934399
chr5	149432854	149492935	-	CSF1R	323.6	318.6	328.6	1.03149	0.0447235	0.2653	0.676053	0.934386
chr12	15066976	15091463	-	ERP27	815.025	808.45	821.6	1.02327	0.033182	0.2646	0.676437	0.934373
chr9	21409146	21410184	+	IFNA8	431.3	414.2	448.4	1.02429	0.0346247	0.2644	0.676547	0.934369
chr1	153516095	153518282	-	S100A4	137160	132249	142070	1.05654	0.0793482	0.2643	0.676602	0.934368
chr20	43835638	43838414	+	SEMG1	3092.65	3086.05	3099.25	1.0284	0.0403955	0.2637	0.676931	0.934356
chr12	9980077	9997603	+	KLRF1	631.875	639.4	624.35	1.03149	0.0447235	0.2637	0.676931	0.934356
chr12	65107222	65153226	-	GNS	5940.98	5753.75	6128.2	1.04081	0.0577078	0.2632	0.677204	0.934347
chr3	148545588	148577972	+	CPB1	571.775	586.05	557.5	1.02634	0.0375101	0.2631	0.677259	0.934345
chr2	85804614	85809156	+	VAMP8	1067.75	1044.2	1091.3	1.02532	0.0360674	0.263	0.677314	0.934343
chr11	13984184	14289679	+	SPON1	322.275	319.15	325.4	1.0284	0.0403955	0.2629	0.677368	0.934341
chr13	77566059	77576652	+	CLN5	1258.53	1277.2	1239.85	1.02942	0.0418382	0.2628	0.677423	0.934339
chr11	132284875	133402403	-	OPCML	19323.1	19027	19619.1	1.02429	0.0346247	0.2626	0.677532	0.934335
chr11	40135751	41481186	-	LRRC4C	589.325	597.45	581.2	1.02429	0.0346247	0.262	0.67786	0.934324
chr16	5074845	5083942	-	NAGPA	1038.78	1040.85	1036.7	1.02634	0.0375101	0.2609	0.67846	0.934302
chr14	75408533	75422467	-	PGF	1063.4	1078.3	1048.5	1.0284	0.0403955	0.2609	0.67846	0.934302
chr2	10923517	10978103	-	PDIA6	209704	204103	215304	1.03977	0.0562651	0.2607	0.678569	0.934298
chr4	141786725	142054616	-	RNF150	583.9	575.75	592.05	1.02224	0.0317393	0.2606	0.678624	0.934296
chr19	55525075	55549632	-	GP6	800	793.45	806.55	1.02429	0.0346247	0.2605	0.678678	0.934294
chr16	31446885	31454348	-	ZNF843	784.825	780.75	788.9	1.02429	0.0346247	0.2601	0.678896	0.934286
chr17	41561334	41601680	+	DHX8	6774.9	6584.45	6965.35	1.03873	0.0548224	0.2601	0.678896	0.934286
chr7	92817899	92855832	-	HEPACAM2	1682.5	1667.6	1697.4	1.0202	0.0288539	0.2598	0.679059	0.93428
chr6	89319616	89673348	-	RNGTT	1266.9	1287.7	1246.1	1.03045	0.0432809	0.2589	0.679548	0.934262
chr1	43124048	43142429	+	PPIH	10276.9	9963.3	10590.4	1.0576	0.0807909	0.2587	0.679657	0.934258
chr8	41786997	41909505	-	KAT6A	827.55	807.3	847.8	1.02429	0.0346247	0.2586	0.679711	0.934256
chr19	51954251	51961708	-	SIGLEC8	1913.4	1877.35	1949.45	1.02327	0.033182	0.2576	0.680254	0.934236
chrX	18657808	18690223	-	RS1	1716.5	1705.75	1727.25	1.02942	0.0418382	0.2572	0.68047	0.934227
chr19	35978226	35981433	-	KRTDAP	6532.48	6149.5	6915.45	1.0284	0.0403955	0.2568	0.680687	0.934219
chr19	54777675	54785033	-	LILRB2	246.825	242.6	251.05	1.02122	0.0302966	0.2567	0.680741	0.934217
chrX	135730336	135742549	+	CD40LG	358.85	346.25	371.45	1.02634	0.0375101	0.2562	0.681011	0.934206
chrX	67718624	67757127	+	YIPF6	1848.9	1828.75	1869.05	1.02327	0.033182	0.256	0.68112	0.934202
chr3	47627378	47823405	-	SMARCC1	2630.72	2636.6	2624.85	1.02224	0.0317393	0.2551	0.681606	0.934183
chr11	64011951	64014413	-	PPP1R14B	174.025	172.8	175.25	1.02737	0.0389528	0.2548	0.681767	0.934176
chr2	58386378	58468515	-	FANCL	860.725	845.35	876.1	1.02224	0.0317393	0.2548	0.681767	0.934176
chr14	20923290	20925931	+	APEX1	183288	171109	195467	1.03458	0.0490516	0.2547	0.681821	0.934174
chr2	174937175	175113365	-	OLA1	83012.2	81355.6	84668.7	1.03873	0.0548224	0.2542	0.682091	0.934163
chr11	193080	194573	+	SCGB1C1	2564.55	2528	2601.1	1.02429	0.0346247	0.2539	0.682252	0.934157
chr1	36348810	36389899	+	AGO1	321.625	318.15	325.1	1.02532	0.0360674	0.2532	0.682629	0.934142
chr12	57106211	57119326	-	NACA	7906.9	8069.35	7744.45	1.02737	0.0389528	0.253	0.682737	0.934137
chr2	177134123	177202753	+	MTX2	1316.67	1272.05	1361.3	1.02429	0.0346247	0.2524	0.683059	0.934124
chr3	50337320	50349812	-	HYAL1	1889.95	1873.05	1906.85	1.02327	0.033182	0.2519	0.683327	0.934113
chr17	34415603	34417506	-	CCL3	1022.25	1031.45	1013.05	1.02532	0.0360674	0.2518	0.683381	0.93411
chr20	43752067	43753106	-	WFDC12	963.15	937.95	988.35	1.02224	0.0317393	0.2518	0.683381	0.93411
chr2	27477440	27485960	-	SLC30A3	5424.8	5383.75	5465.85	1.0284	0.0403955	0.2515	0.683542	0.934104
chr16	69373415	69377013	+	NIP7	6389.77	6529.35	6250.2	1.03355	0.0476089	0.2508	0.683917	0.934088
chr8	120428552	120436678	+	NOV	864.325	866.05	862.6	1.02429	0.0346247	0.2507	0.683971	0.934085
chr3	119243140	119278481	-	CD80	1309.88	1301.25	1318.5	1.02429	0.0346247	0.2504	0.684131	0.934079
chr1	57320443	57383894	+	C8A	7306.3	7228.05	7384.55	1.02122	0.0302966	0.2501	0.684292	0.934072
chr5	158741791	158757481	-	IL12B	1464.12	1450.2	1478.05	1.02942	0.0418382	0.249	0.68488	0.934046
chr2	79384132	79386880	-	REG3A	711.475	706.35	716.6	1.02327	0.033182	0.2485	0.685146	0.934035
chr19	50364460	50370822	-	PNKP	5002.68	6171.7	3833.65	1.12975	0.176009	0.2484	0.6852	0.934032
chr1	201328136	201346828	-	TNNT2	11709.3	11646.9	11771.8	1.02429	0.0346247	0.2483	0.685253	0.93403
chr7	25158270	25164980	-	CYCS	71497.1	70892.6	72101.6	1.04603	0.0649213	0.2482	0.685306	0.934027
chr19	14202507	14228559	-	PRKACA	311.15	305.65	316.65	1.07466	0.103874	0.2482	0.685306	0.934027
chr18	71815746	71826204	+	TIMM21	239.925	234.35	245.5	1.02634	0.0375101	0.2478	0.68552	0.934018
chr19	8117646	8127547	+	CCL25	2709	2676	2742	1.02224	0.0317393	0.2471	0.685892	0.934001
chrX	48432741	48439553	+	RBM3	172097	169029	175166	1.02737	0.0389528	0.2466	0.686158	0.933989
chr12	109577202	109706030	+	ACACB	1627.15	1580.95	1673.35	1.02224	0.0317393	0.2466	0.686158	0.933989
chr3	57743174	57914894	+	SLMAP	5762.55	5753.3	5771.8	1.0284	0.0403955	0.2464	0.686264	0.933985
chr1	155158300	155162706	-	MUC1	1338.88	1348.9	1328.85	1.02224	0.0317393	0.2458	0.686583	0.93397
chr12	114254543	114404176	-	RBM19	1295.4	1318.45	1272.35	1.02429	0.0346247	0.2451	0.686955	0.933953
chr13	48877883	49056026	+	RB1	4022.7	3931.4	4114	1.0284	0.0403955	0.2449	0.687061	0.933948
chr1	153591276	153606568	-	S100A13	11049.1	10470.8	11627.5	1.03149	0.0447235	0.2438	0.687643	0.933921
chr17	7210318	7215782	+	EIF5A	87133.3	81622.9	92643.6	1.03355	0.0476089	0.2436	0.687749	0.933916
chr15	38545052	38649450	+	SPRED1	1383.22	1301.1	1465.35	1.04394	0.0620359	0.2433	0.687907	0.933908
chr1	206808881	206822542	+	DYRK3	17983.2	17604.4	18361.9	1.02327	0.033182	0.2432	0.68796	0.933906
chr12	49329992	49351252	-	ARF3	7109.38	6978.35	7240.4	1.03562	0.0504943	0.2427	0.688224	0.933893
chr21	33784745	33887710	+	EVA1C	1584.35	1553.35	1615.35	1.01918	0.0274112	0.2425	0.68833	0.933888
chr14	93389445	93401638	+	CHGA	2336.53	2332.1	2340.95	1.02532	0.0360674	0.2425	0.68833	0.933888
chr6	91223292	91297020	-	MAP3K7	9505	9437.8	9572.2	1.02634	0.0375101	0.2423	0.688436	0.933883
chr17	42018172	42019833	-	PPY	1524.65	1554.55	1494.75	1.02122	0.0302966	0.242	0.688594	0.933875
chr20	36974814	37005653	+	LBP	142.55	145.35	139.75	1.02737	0.0389528	0.2407	0.689279	0.933842
chr16	75252884	75258822	+	CTRB1	699.6	699.25	699.95	1.02327	0.033182	0.2395	0.689909	0.933811
chr2	9724096	9771184	-	YWHAQ	27564.7	27684.5	27444.8	1.04185	0.0591505	0.239	0.690172	0.933797
chr19	5916152	5978320	-	RANBP3	3588.35	3467.7	3709	1.02942	0.0418382	0.2386	0.690381	0.933787
chr3	184279587	184300196	+	EPHB3	890.5	882.25	898.75	1.0202	0.0288539	0.2384	0.690486	0.933782
chr10	81107220	81115089	+	PPIF	18608	19578.8	17637.2	1.06078	0.085119	0.2383	0.690539	0.933779
chr1	176432307	176811970	+	PAPPA2	1536.03	1536.9	1535.15	1.02737	0.0389528	0.2379	0.690748	0.933768
chr4	69092371	69111412	-	TMPRSS11B	1988.67	1959.1	2018.25	1.01918	0.0274112	0.2378	0.6908	0.933765
chr3	18389133	18480265	-	SATB1	921.25	936.95	905.55	1.02634	0.0375101	0.2368	0.691323	0.933739
chr4	120415550	120549981	-	PDE5A	3620.93	3613.3	3628.55	1.0202	0.0288539	0.2353	0.692106	0.933697
chr19	17416477	17417652	+	MRPL34	1912.17	1902.6	1921.75	1.0202	0.0288539	0.2352	0.692158	0.933695
chr2	88422508	88427650	-	FABP1	1852.5	1829.95	1875.05	1.0202	0.0288539	0.2343	0.692627	0.93367
chr12	113344739	113357712	+	OAS1	821.15	781.1	861.2	1.02737	0.0389528	0.2334	0.693094	0.933644
chr17	29630788	29641130	-	EVI2B	755.55	749.1	762	1.02122	0.0302966	0.2332	0.693198	0.933639
chr10	99344102	99372555	+	HOGA1	2155.28	2127	2183.55	1.02224	0.0317393	0.2331	0.69325	0.933636
chr2	24272584	24286550	+	FKBP1B	846.4	853.55	839.25	1.03873	0.0548224	0.2326	0.69351	0.933622
chr16	67963473	67965778	-	CTRL	11514.9	10526.2	12503.6	1.06823	0.0952179	0.2324	0.693613	0.933616
chr6	71377474	71571716	+	SMAP1	14703.3	14514.8	14891.8	1.02532	0.0360674	0.2317	0.693976	0.933596
chr11	13513601	13517567	-	PTH	1151.33	1153.65	1149	1.02122	0.0302966	0.231	0.694338	0.933576
chr8	144295068	144299044	+	GPIHBP1	157.975	158.55	157.4	1.02634	0.0375101	0.2297	0.69501	0.933538
chr8	7340026	7686575	-	DEFB106A	784.1	774.55	793.65	1.01918	0.0274112	0.2293	0.695216	0.933526
chr5	140345747	140391929	+	PCDHAC2	1492.03	1522.6	1461.45	1.03977	0.0562651	0.2283	0.695731	0.933496
chr19	43256839	43269831	-	PSG8	702.65	709.25	696.05	1.02224	0.0317393	0.2281	0.695834	0.93349
chr1	157764194	157789940	-	FCRL1	748.825	741.25	756.4	1.0202	0.0288539	0.228	0.695885	0.933487
chr2	99900701	99917639	-	LYG1	3763.68	3771.75	3755.6	1.02122	0.0302966	0.2277	0.696039	0.933478
chr3	173116238	174001139	+	NLGN1	522.25	512.55	531.95	1.02327	0.033182	0.2273	0.696245	0.933466
chr22	29469066	29564321	+	KREMEN1	2350.2	2305.05	2395.35	1.0202	0.0288539	0.2267	0.696553	0.933448
chr1	201951766	201975275	+	RNPEP	11630	11585	11675	1.08546	0.118301	0.2266	0.696604	0.933445
chr5	99871124	99922440	+	FAM174A	2605.88	2583.3	2628.45	1.02327	0.033182	0.2265	0.696656	0.933442
chr19	55663136	55669100	-	TNNI3	3296.28	3243.75	3348.8	1.02122	0.0302966	0.2261	0.696861	0.93343
chr5	177631508	177638184	+	HNRNPAB	74220.7	69217.3	79224.1	1.04081	0.0577078	0.226	0.696912	0.933427
chr8	124332091	124408705	-	ATAD2	346.2	346.25	346.15	1.02634	0.0375101	0.2259	0.696963	0.933424
chr2	187558789	187628512	+	FAM171B	1663.08	1587.9	1738.25	1.03355	0.0476089	0.2256	0.697117	0.933415
chr11	102188181	102210135	+	BIRC3	609.125	599.15	619.1	1.02532	0.0360674	0.2252	0.697322	0.933402
chr1	85018804	85040163	-	CTBS	2397.65	2405.35	2389.95	1.02429	0.0346247	0.2245	0.69768	0.933381
chr20	32848171	32857148	+	ASIP	688.475	692.6	684.35	1.02429	0.0346247	0.2244	0.697731	0.933378
chr17	42449550	42466873	-	ITGA2B	2702.38	2732.3	2672.45	1.03045	0.0432809	0.2244	0.697731	0.933378
chr1	208059883	208084683	-	CD34	1316.62	1293.65	1339.6	1.0202	0.0288539	0.2243	0.697782	0.933375
chr6	153308400	153323925	-	MTRF1L	2915.3	2833.8	2996.8	1.0284	0.0403955	0.224	0.697935	0.933365
chr15	41221531	41231258	+	DLL4	534.375	515.3	553.45	1.02224	0.0317393	0.224	0.697935	0.933365
chr9	35829222	35854844	+	TMEM8B	8111.4	7799.75	8423.05	1.02737	0.0389528	0.2233	0.698292	0.933343
chr1	35899091	36023037	-	KIAA0319L	3733.3	3662.45	3804.15	1.0202	0.0288539	0.2217	0.699107	0.933293
chr2	179328391	179343355	-	FKBP7	15760.1	15091.8	16428.4	1.04498	0.0634786	0.2215	0.699208	0.933286
chrX	109917084	110039286	-	CHRDL1	2141.22	2144.85	2137.6	1.02327	0.033182	0.2212	0.699361	0.933277
chr16	810765	818865	+	MSLN	2025.88	2018.8	2032.95	1.0202	0.0288539	0.2208	0.699564	0.933264
chr19	39369195	39390502	-	SIRT2	150327	141527	159128	1.02942	0.0418382	0.2204	0.699767	0.933251
chr21	41384343	42219039	-	DSCAM	2243.95	2208.55	2279.35	1.02327	0.033182	0.2204	0.699767	0.933251
chr7	41728601	41742706	-	INHBA	885.5	855.3	915.7	1.02942	0.0418382	0.218	0.700982	0.933172
chr14	19553365	19584942	+	POTEG	316.075	320.45	311.7	1.0202	0.0288539	0.2177	0.701133	0.933162
chr7	1473995	1499109	-	MICALL2	7355.05	7287.9	7422.2	1.02224	0.0317393	0.2172	0.701385	0.933145
chr20	34291531	34330258	-	RBM39	9046.65	9092.3	9001	1.02532	0.0360674	0.2162	0.701889	0.933112
chr19	18704035	18717660	-	CRLF1	1657.47	1631.75	1683.2	1.0284	0.0403955	0.2156	0.702191	0.933092
chr8	95653364	95719694	+	ESRP1	4001.88	4009.15	3994.6	1.03252	0.0461662	0.2153	0.702342	0.933081
chr9	139871956	139876194	+	PTGDS	980.5	976.1	984.9	1.02429	0.0346247	0.2151	0.702442	0.933075
chr6	41242999	41254457	-	TREM1	618.325	623.65	613	1.02122	0.0302966	0.2144	0.702794	0.933051
chr3	39448204	39454032	+	RPSA	12573.5	12187.6	12959.5	1.02634	0.0375101	0.2143	0.702844	0.933047
chrX	37698089	37706889	-	DYNLT3	3611.35	3586	3636.7	1.01715	0.0245258	0.2141	0.702944	0.93304
chr11	63304273	63313930	+	RARRES3	9237.65	9322.5	9152.8	1.01918	0.0274112	0.2139	0.703044	0.933033
chr2	160797260	160919126	-	PLA2R1	619.625	635.55	603.7	1.04394	0.0620359	0.2137	0.703145	0.933026
chr2	102608306	102644884	+	IL1R2	1141.6	1140.55	1142.65	1.01918	0.0274112	0.2135	0.703245	0.93302
chr15	64364758	64386207	-	FAM96A	642.4	634	650.8	1.0202	0.0288539	0.2132	0.703395	0.933009
chr2	106361520	106510730	+	NCK2	16830.7	15988.3	17673	1.02634	0.0375101	0.213	0.703495	0.933002
chr14	62162119	62214977	+	HIF1A	861.2	850.45	871.95	1.02224	0.0317393	0.2129	0.703545	0.932999
chr17	41322488	41363708	+	NBR1	3588.32	3464.2	3712.45	1.04081	0.0577078	0.2127	0.703645	0.932992
chr5	131877136	131879214	-	IL5	720.7	705.7	735.7	1.0202	0.0288539	0.2124	0.703795	0.932981
chr1	11917521	11918992	-	NPPB	1010.5	1009.7	1011.3	1.01816	0.0259685	0.212	0.703995	0.932967
chr8	37963011	37997598	+	ASH2L	2162.97	2184.05	2141.9	1.02122	0.0302966	0.2109	0.704544	0.932928
chr6	43737946	43754223	+	VEGFA	3585.35	3572.7	3598	1.02532	0.0360674	0.2108	0.704594	0.932925
chr10	125425871	125456913	+	GPR26	4943.25	4852.7	5033.8	1.0202	0.0288539	0.2104	0.704793	0.932911
chr3	15642859	15687328	+	BTD	3823.72	3916.35	3731.1	1.05232	0.0735774	0.2104	0.704793	0.932911
chr11	74407474	74442227	-	CHRDL2	821.2	820.6	821.8	1.0202	0.0288539	0.2104	0.704793	0.932911
chr9	133768815	133769225	-	QRFP	2825.05	2833.35	2816.75	1.01715	0.0245258	0.2104	0.704793	0.932911
chr22	37521880	37545962	-	IL2RB	1024.7	1042.35	1007.05	1.02122	0.0302966	0.2103	0.704843	0.932907
chr2	54014068	54045956	+	ERLEC1	20269.6	19985.3	20553.8	1.03873	0.0548224	0.2089	0.705539	0.932857
chr5	40759481	40798297	-	PRKAA1	831.275	842.15	820.4	1.0202	0.0288539	0.2073	0.706332	0.932798
chr1	39303869	39325495	-	RRAGC	470.275	457.75	482.8	1.02532	0.0360674	0.207	0.706481	0.932787
chr13	99445741	99738660	-	DOCK9	1169.78	1180.1	1159.45	1.01918	0.0274112	0.2062	0.706876	0.932758
chr1	169075947	169101960	+	ATP1B1	13679.8	13266.7	14093	1.02122	0.0302966	0.206	0.706975	0.93275
chr15	83517729	83621476	-	HOMER2	709.9	694.45	725.35	1.06503	0.0908898	0.2059	0.707025	0.932747
chr1	63063158	63071976	+	ANGPTL3	1112.12	1112.9	1111.35	1.02224	0.0317393	0.2054	0.707271	0.932728
chr6	37450697	37467700	-	CCDC167	1946.75	1909.95	1983.55	1.01715	0.0245258	0.2051	0.707419	0.932717
chr6	160390131	160527583	+	IGF2R	30173	29819.8	30526.2	1.03045	0.0432809	0.2049	0.707518	0.932709
chr10	5454514	5501019	+	NET1	800.875	811.95	789.8	1.02122	0.0302966	0.2033	0.708305	0.932649
chr15	85198360	85201802	-	NMB	1907.15	1909.3	1905	1.01918	0.0274112	0.2028	0.708551	0.93263
chr20	2774715	2781292	-	CPXM1	607.325	607.6	607.05	1.01918	0.0274112	0.2025	0.708698	0.932618
chr2	215276461	215440653	+	VWC2L	1044.03	1053.65	1034.4	1.01918	0.0274112	0.2023	0.708796	0.932611
chr17	79213111	79215098	+	C17orf89	2314.03	2366.55	2261.5	1.02122	0.0302966	0.2021	0.708894	0.932603
chr9	95820970	95847418	+	SUSD3	581.525	578.55	584.5	1.01816	0.0259685	0.2004	0.709727	0.932537
chr11	66824289	66839488	+	RHOD	424.1	408.4	439.8	1.02122	0.0302966	0.2004	0.709727	0.932537
chr11	44953899	44972857	-	TP53I11	47368.4	45437.2	49299.7	1.02634	0.0375101	0.2003	0.709775	0.932533
chr22	21271714	21308037	+	CRKL	43669.7	41963.6	45375.7	1.02634	0.0375101	0.2003	0.709775	0.932533
chr9	34366664	34376894	-	KIAA1161	357.8	357.45	358.15	1.01816	0.0259685	0.2	0.709922	0.932522
chr19	12936291	12946242	-	RTBDN	879.025	858.85	899.2	1.02224	0.0317393	0.1995	0.710166	0.932502
chr17	78440633	78450404	-	NPTX1	1346.35	1311.6	1381.1	1.01715	0.0245258	0.1991	0.710361	0.932486
chr17	42982994	42992920	-	GFAP	872.125	875.95	868.3	1.0202	0.0288539	0.1988	0.710507	0.932474
chr1	154897208	154909484	-	PMVK	2440.55	2422.65	2458.45	1.02737	0.0389528	0.1987	0.710556	0.932471
chr9	131857073	131873070	-	CRAT	14014.5	13736.1	14292.9	1.02737	0.0389528	0.1984	0.710702	0.932459
chr19	51913275	51921057	-	SIGLEC10	716.925	720.35	713.5	1.01816	0.0259685	0.1979	0.710945	0.932439
chr5	132532152	132948223	-	FSTL4	1788.03	1751.5	1824.55	1.02224	0.0317393	0.197	0.711383	0.932403
chr4	52886861	52904485	-	SGCB	2991.2	2921.45	3060.95	1.01715	0.0245258	0.1967	0.711529	0.932391
chr10	90973326	91011796	-	LIPA	647.075	644.85	649.3	1.03562	0.0504943	0.1963	0.711723	0.932375
chr16	31469594	31478488	+	ARMC5	3716.6	3645.25	3787.95	1.01715	0.0245258	0.1961	0.71182	0.932367
chr8	7353368	7673238	+	DEFB107A	519.7	520.65	518.75	1.0202	0.0288539	0.1951	0.712304	0.932326
chr7	49813257	49952138	+	VWC2	592.175	605	579.35	1.0202	0.0288539	0.195	0.712352	0.932322
chr3	129693236	129696781	+	TRH	788.5	794.1	782.9	1.01715	0.0245258	0.195	0.712352	0.932322
chr18	63417488	63548175	+	CDH7	10607.5	10739.5	10475.6	1.02532	0.0360674	0.195	0.712352	0.932322
chr9	27109139	27230176	+	TEK	1172.15	1143.15	1201.15	1.01918	0.0274112	0.1948	0.712449	0.932314
chr7	73624087	73644164	+	LAT2	498.35	491.25	505.45	1.02122	0.0302966	0.1945	0.712594	0.932301
chr8	31497268	32622558	+	NRG1	510.225	482.9	537.55	1.03769	0.0533797	0.1944	0.712642	0.932297
chr2	47129009	47168994	-	MCFD2	463.9	450.95	476.85	1.01918	0.0274112	0.1936	0.713029	0.932264
chr19	39306062	39322497	-	ECH1	1331	1376.15	1285.85	1.02429	0.0346247	0.1928	0.713414	0.932231
chr3	157154580	157161417	+	PTX3	1620.78	1611.4	1630.15	1.02224	0.0317393	0.1924	0.713607	0.932215
chr17	7529556	7531194	-	SAT2	3274.3	3232.4	3316.2	1.02737	0.0389528	0.1921	0.713751	0.932202
chr7	16832264	16844738	-	AGR2	3732.47	3614.5	3850.45	1.01715	0.0245258	0.192	0.713799	0.932198
chr2	69623245	69664760	-	NFU1	2622.57	2579.85	2665.3	1.02634	0.0375101	0.1911	0.714232	0.93216
chr4	40812044	41216635	-	APBB2	1255.4	1256.5	1254.3	1.02122	0.0302966	0.191	0.71428	0.932156
chr5	34017963	34043371	-	C1QTNF3	9941.85	9572.2	10311.5	1.02122	0.0302966	0.1909	0.714328	0.932152
chr3	186933873	187009810	-	MASP1	9553.83	9556.4	9551.25	1.01918	0.0274112	0.1907	0.714424	0.932143
chr11	82970135	82997450	-	CCDC90B	649.425	652.95	645.9	1.02122	0.0302966	0.1901	0.714712	0.932118
chr21	45875393	45878739	+	LRRC3	562.175	560.8	563.55	1.01715	0.0245258	0.1899	0.714807	0.932109
chr20	1874813	1920540	+	SIRPA	1671.17	1706.85	1635.5	1.02429	0.0346247	0.1899	0.714807	0.932109
chr11	108342833	108369159	-	KDELC2	36743	40678	32807.9	1.04081	0.0577078	0.1889	0.715286	0.932066
chr2	101892063	101925178	-	RNF149	982.975	960.05	1005.9	1.01613	0.0230831	0.1887	0.715382	0.932058
chr4	1795039	1810599	+	FGFR3	3918.35	3930.25	3906.45	1.01918	0.0274112	0.1887	0.715382	0.932058
chr19	55684469	55691720	-	SYT5	1849.97	1837.15	1862.8	1.01715	0.0245258	0.1882	0.715621	0.932036
chr14	101193202	101201467	+	DLK1	972.7	959.9	985.5	1.01816	0.0259685	0.1877	0.715859	0.932015
chr8	143293441	143484610	-	TSNARE1	2121.53	2072.8	2170.25	1.01511	0.0216404	0.1873	0.71605	0.931997
chr12	117153596	117175843	-	C12orf49	1081.22	1095.65	1066.8	1.01816	0.0259685	0.1867	0.716336	0.931971
chr11	644225	695740	-	DEAF1	34965.8	33193.9	36737.8	1.02429	0.0346247	0.1865	0.716431	0.931962
chr10	48413092	48416872	-	GDF2	4151.45	4100.75	4202.15	1.0202	0.0288539	0.1863	0.716526	0.931954
chr19	51226605	51228981	+	CLEC11A	836.4	828.4	844.4	1.01816	0.0259685	0.1861	0.716621	0.931945
chr19	49792892	49828474	-	SLC6A16	397.625	390.95	404.3	1.01816	0.0259685	0.1861	0.716621	0.931945
chr9	34551430	34590138	-	CNTFR	664.325	674.35	654.3	1.01816	0.0259685	0.1854	0.716954	0.931914
chr16	56691855	56693215	+	MT1F	2699.4	2673.5	2725.3	1.01715	0.0245258	0.1854	0.716954	0.931914
chrX	154292309	154299547	-	MTCP1	1000.15	995	1005.3	1.01613	0.0230831	0.1853	0.717001	0.93191
chr10	7601232	7708961	-	ITIH5	1306.75	1370.25	1243.25	1.03252	0.0461662	0.1853	0.717001	0.93191
chr1	1981909	2116834	+	PRKCZ	7440.8	6953.4	7928.2	1.02429	0.0346247	0.1842	0.717523	0.931861
chr19	51559463	51568367	-	KLK13	366.975	358.3	375.65	1.01918	0.0274112	0.1841	0.717571	0.931857
chr5	88014058	88199922	-	MEF2C	1793.17	1787.5	1798.85	1.03666	0.051937	0.184	0.717618	0.931852
chr1	40766163	40782939	-	COL9A2	866.25	872	860.5	1.01715	0.0245258	0.1836	0.717807	0.931834
chr3	136537861	136574734	+	SLC35G2	150158	143315	157002	1.02429	0.0346247	0.1817	0.718705	0.931749
chr17	34538310	34641846	+	CCL4L1	267.45	271.95	262.95	1.01918	0.0274112	0.1812	0.718941	0.931726
chr22	36649117	36663577	+	APOL1	436.925	445	428.85	1.01918	0.0274112	0.181	0.719035	0.931717
chr3	186358149	186370797	+	FETUB	598.85	600.5	597.2	1.01816	0.0259685	0.1788	0.720069	0.931615
chr14	75598171	75643349	-	TMED10	4636.7	4625.15	4648.25	1.01715	0.0245258	0.1785	0.720209	0.931602
chr20	5525080	5591672	-	GPCPD1	1011.85	1002.4	1021.3	1.01918	0.0274112	0.1785	0.720209	0.931602
chr4	75671448	75719882	-	BTC	1505.28	1510.65	1499.9	1.01918	0.0274112	0.1782	0.72035	0.931588
chr17	34324618	34329084	-	CCL15	1386.9	1364	1409.8	1.01715	0.0245258	0.1779	0.72049	0.931574
chr19	53611132	53636173	-	ZNF415	971.225	956.8	985.65	1.01918	0.0274112	0.1777	0.720584	0.931564
chr16	3451190	3459364	+	ZNF174	1979.6	1960.55	1998.65	1.0141	0.0201977	0.1776	0.720631	0.93156
chr15	74421715	74429143	+	ISLR2	1830.78	1797.05	1864.5	1.01613	0.0230831	0.1773	0.720771	0.931545
chr9	77112252	77302117	+	RORB	718.4	704.3	732.5	1.01715	0.0245258	0.1773	0.720771	0.931545
chr12	6881670	6887621	+	LAG3	370.525	371.3	369.75	1.01918	0.0274112	0.1772	0.720818	0.931541
chr19	35773410	35776045	+	HAMP	641.9	639.25	644.55	1.01511	0.0216404	0.1768	0.721005	0.931522
chr19	18496968	18499986	+	GDF15	907.75	903.75	911.75	1.0202	0.0288539	0.1764	0.721191	0.931503
chr1	159141377	159172932	+	CADM3	1841.72	1881.8	1801.65	1.01816	0.0259685	0.1762	0.721285	0.931494
chr1	156611740	156629324	+	BCAN	294.075	289.9	298.25	1.0202	0.0288539	0.1762	0.721285	0.931494
chr1	16370231	16383821	+	CLCNKB	1704.9	1678.3	1731.5	1.01816	0.0259685	0.176	0.721378	0.931484
chr6	41157487	41168925	-	TREML2	702.45	693.95	710.95	1.01511	0.0216404	0.1745	0.722077	0.931413
chr12	15094950	15114562	-	ARHGDIB	220697	209229	232165	1.02737	0.0389528	0.1739	0.722355	0.931384
chr2	198351308	198364998	-	HSPD1	158193	151884	164502	1.02532	0.0360674	0.1734	0.722587	0.93136
chr5	95726040	95768985	-	PCSK1	1434.58	1459.35	1409.8	1.01715	0.0245258	0.1734	0.722587	0.93136
chr5	42423877	42721980	+	GHR	776.8	782.95	770.65	1.01613	0.0230831	0.1732	0.72268	0.93135
chr14	73704205	73741347	+	PAPLN	1560.35	1589.35	1531.35	1.01613	0.0230831	0.1718	0.723329	0.931282
chr3	42299318	42307662	-	CCK	1097.6	1093.4	1101.8	1.01613	0.0230831	0.1714	0.723514	0.931263
chr2	102972743	103015235	+	IL18R1	997.95	969.2	1026.7	1.01613	0.0230831	0.1711	0.723652	0.931248
chr7	45039345	45116069	+	CCM2	17800.9	17284.3	18317.5	1.0202	0.0288539	0.1704	0.723975	0.931213
chr8	42032236	42065194	-	PLAT	996.525	981.6	1011.45	1.01816	0.0259685	0.1704	0.723975	0.931213
chr3	122283185	122294049	+	DTX3L	1247.78	1220.75	1274.8	1.01613	0.0230831	0.17	0.72416	0.931194
chr20	14304639	14318313	-	FLRT3	914.025	903.35	924.7	1.01613	0.0230831	0.17	0.72416	0.931194
chr20	39657462	39753126	+	TOP1	1444.35	1409.2	1479.5	1.04498	0.0634786	0.1698	0.724252	0.931184
chr10	124608610	124639157	-	FAM24B	505.425	511.85	499	1.01613	0.0230831	0.169	0.72462	0.931144
chr4	17578927	17609590	+	LAP3	90616.2	89564.7	91667.8	1.03355	0.0476089	0.1679	0.725126	0.931089
chr21	33031935	33041243	+	SOD1	1358.67	1284.25	1433.1	1.01918	0.0274112	0.1675	0.725309	0.931069
chr17	40996609	41002724	+	AOC2	729.175	723.25	735.1	1.0141	0.0201977	0.1673	0.725401	0.931059
chr22	18043183	18073647	+	SLC25A18	2303.85	2344.2	2263.5	1.0202	0.0288539	0.1672	0.725447	0.931054
chr9	4985245	5128183	+	JAK2	60115.5	58756.6	61474.4	1.01816	0.0259685	0.1671	0.725492	0.931049
chr18	72163500	72190689	+	CNDP2	2120.3	2126.35	2114.25	1.01511	0.0216404	0.1669	0.725584	0.931038
chr7	100171634	100183811	-	LRCH4	3742.38	3708.2	3776.55	1.01511	0.0216404	0.1665	0.725767	0.931018
chr10	101909847	101945814	-	ERLIN1	3378.9	3382.85	3374.95	1.01715	0.0245258	0.1665	0.725767	0.931018
chr6	22287473	22303082	-	PRL	6625.77	6734.05	6517.5	1.01816	0.0259685	0.1662	0.725904	0.931003
chr1	219347192	219386207	+	LYPLAL1	1097.8	1084.55	1111.05	1.01308	0.018755	0.1656	0.726179	0.930972
chr2	87042460	87089047	-	CD8B	3242.57	3208.6	3276.55	1.01511	0.0216404	0.1655	0.726224	0.930967
chr6	112429134	112575917	-	LAMA4	2423.57	2447.7	2399.45	1.01715	0.0245258	0.1654	0.72627	0.930962
chr6	170591294	170599697	-	DLL1	2777.03	2808.65	2745.4	1.01613	0.0230831	0.1654	0.72627	0.930962
chr17	79523913	79604138	-	NPLOC4	15945.9	16372.8	15519	1.01918	0.0274112	0.1651	0.726407	0.930947
chr13	113777113	113803843	+	F10	892.55	880	905.1	1.01715	0.0245258	0.1645	0.726681	0.930916
chr14	25075686	25078926	-	GZMH	751.025	743.55	758.5	1.01816	0.0259685	0.1638	0.727	0.93088
chr3	112641532	112693937	-	CD200R1	929.375	947.75	911	1.01613	0.0230831	0.1631	0.727318	0.930844
chr4	76922623	76928641	-	CXCL9	894.275	891.9	896.65	1.01308	0.018755	0.1629	0.727409	0.930833
chr14	69846840	69865021	-	ERH	119234	115703	122765	1.01918	0.0274112	0.1629	0.727409	0.930833
chr6	52101484	52109298	-	IL17F	570.9	576.3	565.5	1.0141	0.0201977	0.1628	0.727454	0.930828
chr16	68771195	68869444	+	CDH1	1353.12	1343	1363.25	1.01715	0.0245258	0.1622	0.727727	0.930797
chr19	13064970	13068068	-	GADD45GIP1	802.125	799.65	804.6	1.01308	0.018755	0.1621	0.727772	0.930792
chr19	55875750	55881831	-	IL11	560.9	552.2	569.6	1.01918	0.0274112	0.162	0.727818	0.930786
chr12	50523089	50561316	-	CERS5	750.9	763.85	737.95	1.01613	0.0230831	0.1613	0.728135	0.93075
chr7	143078360	143088206	+	ZYX	85546.9	85342.4	85751.4	1.02429	0.0346247	0.1608	0.728361	0.930723
chr4	70796799	70812288	+	CSN1S1	1974.55	1942.85	2006.25	1.01816	0.0259685	0.1604	0.728542	0.930702
chr10	17851342	18200091	+	MRC1	81.775	80.45	83.1	1.01613	0.0230831	0.1604	0.728542	0.930702
chr14	105607318	105635161	-	JAG2	1102.88	1140.7	1065.05	1.0202	0.0288539	0.1592	0.729084	0.930638
chr15	67358195	67487533	+	SMAD3	51462.3	53211.4	49713.2	1.02634	0.0375101	0.1591	0.729129	0.930633
chr6	34385231	34393902	-	RPS10	3984.28	3823.85	4144.7	1.02327	0.033182	0.1584	0.729445	0.930596
chr15	33010205	33026870	+	GREM1	2106.78	2112.55	2101	1.02122	0.0302966	0.1578	0.729715	0.930563
chr19	52074531	52092991	+	ZNF175	5016.95	4913.8	5120.1	1.01613	0.0230831	0.1575	0.72985	0.930547
chr6	43418090	43424370	-	DLK2	499.05	496.75	501.35	1.01308	0.018755	0.1571	0.730029	0.930526
chr3	30647994	30735633	+	TGFBR2	3355.18	3312.85	3397.5	1.0141	0.0201977	0.1567	0.730209	0.930504
chr11	59620281	59634041	-	TCN1	1053.95	1076.55	1031.35	1.01715	0.0245258	0.1564	0.730344	0.930488
chr19	18169805	18209626	-	IL12RB1	1162.05	1170.85	1153.25	1.01715	0.0245258	0.1562	0.730433	0.930477
chr12	1929433	1945918	+	LRTM2	9085.45	8549.45	9621.45	1.01715	0.0245258	0.156	0.730523	0.930466
chrX	37208528	37316548	+	PRRG1	3777.45	3711.95	3842.95	1.01308	0.018755	0.1556	0.730702	0.930444
chr9	13105703	13279563	-	MPDZ	476.4	493.9	458.9	1.02942	0.0418382	0.1553	0.730836	0.930428
chr8	21549530	21646346	-	GFRA2	4842.6	4699.4	4985.8	1.01715	0.0245258	0.1551	0.730926	0.930417
chr10	90521163	90537999	+	LIPN	4107.2	4033.65	4180.75	1.01511	0.0216404	0.1549	0.731015	0.930406
chr8	18027971	18081198	+	NAT1	46984	46128.8	47839.2	1.01918	0.0274112	0.1548	0.73106	0.9304
chr9	101984570	101992901	+	SEC61B	1092.7	1115.9	1069.5	1.0141	0.0201977	0.1545	0.731194	0.930384
chr1	197170592	197447585	+	CRB1	784.35	790.5	778.2	1.01511	0.0216404	0.1538	0.731507	0.930345
chr7	127881331	127897682	+	LEP	4675.73	4589.35	4762.1	1.0141	0.0201977	0.1534	0.731685	0.930323
chrX	1314894	1331616	-	CRLF2	530.525	525.85	535.2	1.01308	0.018755	0.1527	0.731997	0.930284
chr19	55888204	55889612	+	TMEM190	543.825	533.35	554.3	1.01308	0.018755	0.1525	0.732086	0.930273
chr17	74002927	74023507	-	EVPL	1746.62	1778.2	1715.05	1.01715	0.0245258	0.1524	0.73213	0.930268
chrX	107069084	107174867	+	MID2	1888.03	1873.3	1902.75	1.0141	0.0201977	0.1524	0.73213	0.930268
chr19	55417508	55424439	+	NCR1	4429.57	4358.5	4500.65	1.0141	0.0201977	0.1509	0.732797	0.930183
chr10	54074041	54077417	+	DKK1	36332.7	38662.8	34002.4	1.04917	0.0692494	0.1506	0.73293	0.930167
chr18	28645942	28682388	-	DSC2	812.75	794.4	831.1	1.01308	0.018755	0.1501	0.733151	0.930138
chr4	78432907	78532988	+	CXCL13	471.8	470.65	472.95	1.01613	0.0230831	0.1499	0.73324	0.930127
chr17	42431101	42441235	-	FAM171A2	10387.7	10404	10371.4	1.0141	0.0201977	0.1498	0.733284	0.930121
chr2	152214106	152236562	+	TNFAIP6	303.975	297.85	310.1	1.02532	0.0360674	0.1497	0.733328	0.930116
chr11	59807748	59815516	+	OOSP2	1030.55	1019.7	1041.4	1.01207	0.0173123	0.149	0.733638	0.930076
chr19	49403307	49426540	+	NUCB1	32593.5	32556.2	32630.7	1.02122	0.0302966	0.1488	0.733726	0.930064
chr14	94953620	94984181	-	SERPINA12	2926.7	2898.05	2955.35	1.01613	0.0230831	0.1488	0.733726	0.930064
chr8	1772149	1906807	+	ARHGEF10	47720.9	47817.8	47623.9	1.01613	0.0230831	0.1479	0.734123	0.930013
chr2	95963072	96051825	+	KCNIP3	2264.38	2289.4	2239.35	1.01207	0.0173123	0.1473	0.734388	0.929978
chr8	97238904	97247862	-	UQCRB	9713.33	9637	9789.65	1.01918	0.0274112	0.1467	0.734652	0.929944
chr19	43406234	43422076	-	PSG6	1022.98	1029.2	1016.75	1.01308	0.018755	0.1467	0.734652	0.929944
chr1	32716840	32751768	+	LCK	276.8	271.9	281.7	1.01308	0.018755	0.1466	0.734696	0.929938
chr15	81268095	81282205	-	MESDC2	16610.8	16512.8	16708.8	1.01613	0.0230831	0.1462	0.734872	0.929915
chr14	94908801	94919122	-	SERPINA11	1444.25	1436.05	1452.45	1.0141	0.0201977	0.1458	0.735047	0.929892
chr19	1269267	1274809	+	CIRBP	152647	149414	155880	1.01715	0.0245258	0.1456	0.735135	0.92988
chrX	15518900	15574652	+	BMX	1604.1	1603.2	1605	1.01511	0.0216404	0.1445	0.735617	0.929816
chr1	230838272	230850336	-	AGT	580.85	585.5	576.2	1.01308	0.018755	0.1442	0.735749	0.929798
chr19	55174271	55181810	+	LILRB4	9381.75	9106.55	9656.95	1.03149	0.0447235	0.1441	0.735792	0.929792
chr1	162602228	162750247	+	DDR2	6297.7	6262.85	6332.55	1.01207	0.0173123	0.1438	0.735923	0.929774
chr9	125026882	125085742	+	MRRF	6800.25	6663.15	6937.35	1.01308	0.018755	0.1434	0.736098	0.929751
chr11	119209644	119217383	-	MFRP	3865.07	3808	3922.15	1.01918	0.0274112	0.1434	0.736098	0.929751
chr5	177664617	178017556	-	COL23A1	458.525	459.8	457.25	1.02429	0.0346247	0.1428	0.73636	0.929715
chr3	186330850	186339107	+	AHSG	7416.27	7333.85	7498.7	1.0141	0.0201977	0.1426	0.736447	0.929704
chr16	3014217	3018384	+	KREMEN2	2289.15	2199.1	2379.2	1.01511	0.0216404	0.1426	0.736447	0.929704
chr6	52761439	52774496	-	GSTA3	117.525	116.75	118.3	1.01308	0.018755	0.1421	0.736665	0.929674
chrX	129263338	129299861	-	AIFM1	2679.47	2662.45	2696.5	1.0141	0.0201977	0.1418	0.736796	0.929656
chr2	113763449	113765621	+	IL36A	3953.03	3858.15	4047.9	1.01308	0.018755	0.1414	0.73697	0.929632
chr8	108261710	108510254	-	ANGPT1	830.425	817.55	843.3	1.01308	0.018755	0.141	0.737144	0.929608
chr1	41492871	41707815	-	SCMH1	9456.6	9103.15	9810.05	1.01613	0.0230831	0.1399	0.737622	0.929542
chr10	71390003	71393355	+	C10orf35	56961.8	56882.6	57041.2	1.01613	0.0230831	0.1397	0.737708	0.92953
chr9	26993135	27005691	-	LRRC19	232.925	236.4	229.45	1.0141	0.0201977	0.1391	0.737968	0.929494
chr5	131993865	131996801	+	IL13	1410.7	1433.1	1388.3	1.01308	0.018755	0.1391	0.737968	0.929494
chr2	106682113	106694609	+	C2orf40	3938.78	3905.6	3971.95	1.01308	0.018755	0.1389	0.738055	0.929481
chrX	47001615	47004609	-	NDUFB11	5874.73	5814.35	5935.1	1.01308	0.018755	0.1385	0.738228	0.929457
chr20	10199477	10288066	+	SNAP25	2945.25	2886.5	3004	1.01308	0.018755	0.1385	0.738228	0.929457
chr1	160708847	160724608	+	SLAMF7	6794.57	6653.8	6935.35	1.0141	0.0201977	0.1382	0.738358	0.929439
chr4	7432021	7436700	-	PSAPL1	1984.75	1981.4	1988.1	1.01207	0.0173123	0.1378	0.73853	0.929414
chr11	45669239	45687206	-	CHST1	1404.15	1416.2	1392.1	1.01308	0.018755	0.1377	0.738574	0.929408
chr1	20301924	20306932	-	PLA2G2A	1242.55	1232.7	1252.4	1.0141	0.0201977	0.1373	0.738746	0.929384
chr9	113127529	113342160	-	SVEP1	1718	1739.5	1696.5	1.01511	0.0216404	0.137	0.738875	0.929365
chr7	81331444	81399452	-	HGF	736.35	724.35	748.35	1.01207	0.0173123	0.1351	0.739693	0.929248
chr7	99354583	99381811	-	CYP3A4	3028.38	3007.55	3049.2	1.0141	0.0201977	0.1349	0.739779	0.929236
chr9	133777825	133814455	-	FIBCD1	1895.38	1888.65	1902.1	1.01106	0.0158696	0.1344	0.739993	0.929205
chr1	53708041	53793821	-	LRP8	1933.53	1911.75	1955.3	1.01308	0.018755	0.1318	0.741105	0.929041
chrX	48779303	48815648	-	OTUD5	6580.43	6504.85	6656	1.01308	0.018755	0.1316	0.74119	0.929029
chr6	31683133	31685581	+	LY6G6D	816.725	807	826.45	1.01106	0.0158696	0.1312	0.741361	0.929003
chr6	52051185	52055436	+	IL17A	804.625	821.85	787.4	1.01511	0.0216404	0.1295	0.742083	0.928895
chr17	18148131	18162230	-	FLII	3864.45	3733.75	3995.15	1.01816	0.0259685	0.1293	0.742168	0.928882
chr22	18216906	18257431	-	BID	1471.95	1439.5	1504.4	1.01308	0.018755	0.129	0.742295	0.928863
chr19	45910591	45927177	-	ERCC1	843.925	855.7	832.15	1.01207	0.0173123	0.1289	0.742338	0.928856
chrX	150903218	150914036	+	CNGA2	612.275	614.65	609.9	1.01308	0.018755	0.1286	0.742465	0.928837
chr16	31227283	31228395	-	PYDC1	668.6	663.05	674.15	1.01207	0.0173123	0.1285	0.742507	0.92883
chr3	182840003	182880667	-	LAMP3	963.475	963.65	963.3	1.01106	0.0158696	0.128	0.742719	0.928798
chr9	5510545	5571282	+	PDCD1LG2	2050.57	1983.9	2117.25	1.01918	0.0274112	0.128	0.742719	0.928798
chr10	6469105	6622263	-	PRKCQ	2682.43	2704.95	2659.9	1.01511	0.0216404	0.1279	0.742761	0.928792
chr4	123372626	123377650	-	IL2	684.95	687.3	682.6	1.01207	0.0173123	0.1278	0.742803	0.928785
chr3	184089723	184097476	-	THPO	1447.58	1427.55	1467.6	1.01106	0.0158696	0.1278	0.742803	0.928785
chr1	155051348	155060014	+	EFNA3	1615.88	1620.9	1610.85	1.01106	0.0158696	0.1277	0.742846	0.928779
chr1	153965168	154127592	-	NUP210L	3087.53	3100.75	3074.3	1.01308	0.018755	0.1269	0.743184	0.928727
chr8	95261485	95274547	-	GEM	21948	21030.8	22865.1	1.01308	0.018755	0.1267	0.743268	0.928714
chr2	1417233	1546499	+	TPO	5371.95	5323.6	5420.3	1.0141	0.0201977	0.1263	0.743437	0.928687
chr14	105235687	105262080	-	AKT1	340.625	334.7	346.55	1.01207	0.0173123	0.1259	0.743605	0.928661
chr17	40276994	40307062	-	RAB5C	54797.9	56582.8	53013.2	1.02634	0.0375101	0.1254	0.743816	0.928628
chr11	72287184	72385497	-	PDE2A	40973.2	40581.9	41364.6	1.01207	0.0173123	0.1253	0.743858	0.928622
chr10	124591671	124605691	-	CUZD1	1536.25	1559.3	1513.2	1.01511	0.0216404	0.1251	0.743942	0.928609
chr19	859665	863610	+	CFD	2731.2	2712.75	2749.65	1.01106	0.0158696	0.1251	0.743942	0.928609
chr20	25275379	25371618	-	ABHD12	1138.1	1164	1112.2	1.0141	0.0201977	0.1246	0.744152	0.928576
chr19	13049414	13055304	+	CALR	5185	5105.25	5264.75	1.01511	0.0216404	0.1245	0.744194	0.928569
chr19	49122548	49133663	+	SPHK2	957.825	948.8	966.85	1.01106	0.0158696	0.1242	0.74432	0.928549
chr11	809936	812876	+	RPLP2	2781.5	2823.1	2739.9	1.01308	0.018755	0.1241	0.744362	0.928543
chr10	12391583	12871733	+	CAMK1D	3447.25	3374	3520.5	1.01106	0.0158696	0.1229	0.744865	0.928463
chr22	21369442	21382302	+	P2RX6	2710.32	2661.3	2759.35	1.01106	0.0158696	0.1228	0.744907	0.928456
chr18	657604	673499	+	TYMS	320.675	319.75	321.6	1.01106	0.0158696	0.1227	0.744948	0.92845
chr22	36002811	36019401	-	MB	1110.2	1107.7	1112.7	1.01106	0.0158696	0.1227	0.744948	0.92845
chr13	103436631	103451404	-	KDELC1	2860.68	2741.8	2979.55	1.01613	0.0230831	0.1226	0.74499	0.928443
chr12	10065826	10084980	-	CLEC2A	945.575	945.95	945.2	1.01207	0.0173123	0.1221	0.745199	0.92841
chr5	156887027	156901730	+	NIPAL4	2547.1	2499.85	2594.35	1.01207	0.0173123	0.1213	0.745533	0.928356
chr7	55086725	55275031	+	EGFR	1014.4	993.2	1035.6	1.01207	0.0173123	0.1211	0.745617	0.928343
chr3	68780915	68981761	-	FAM19A4	1488.05	1494.1	1482	1.01308	0.018755	0.1205	0.745867	0.928302
chrX	1387693	1428828	+	CSF2RA	3662.43	3671.5	3653.35	1.01106	0.0158696	0.1198	0.746158	0.928255
chr1	24882567	24935818	+	NCMAP	3022.57	2999.45	3045.7	1.01005	0.014427	0.1194	0.746324	0.928228
chr1	162348696	162356608	+	C1orf226	8186.75	8153.25	8220.25	1.01207	0.0173123	0.1185	0.746698	0.928166
chr11	102733464	102745764	-	MMP12	201.7	209.5	193.9	1.01511	0.0216404	0.1179	0.746946	0.928125
chr7	44084239	44101316	+	DBNL	17407.7	17070.3	17745	1.0141	0.0201977	0.1179	0.746946	0.928125
chrX	80457303	80554046	+	SH3BGRL	6290.5	6264.85	6316.15	1.01715	0.0245258	0.1179	0.746946	0.928125
chr3	142838618	142842856	+	CHST2	667.55	660.25	674.85	1.01207	0.0173123	0.1174	0.747153	0.928091
chr17	76210277	76221716	+	BIRC5	2031.88	1998.35	2065.4	1.01715	0.0245258	0.1173	0.747194	0.928084
chr11	116706469	116708338	-	APOA1	939.825	930.7	948.95	1.01005	0.014427	0.117	0.747318	0.928063
chr8	17721900	17753047	-	FGL1	4835.68	4867.3	4804.05	1.01207	0.0173123	0.1169	0.74736	0.928057
chr4	103946652	103998170	-	SLC9B2	2337.5	2345.85	2329.15	1.01207	0.0173123	0.1163	0.747607	0.928015
chr19	52145806	52150132	-	SIGLEC14	384	387.05	380.95	1.01106	0.0158696	0.116	0.747731	0.927994
chr7	75441114	75443033	-	CCL24	762.575	756.1	769.05	1.01207	0.0173123	0.115	0.748143	0.927925
chr11	126138935	126148027	+	FOXRED1	4129.4	4065.45	4193.35	1.01106	0.0158696	0.1147	0.748267	0.927904
chr18	319355	500729	-	COLEC12	973.9	1100.5	847.3	1.06184	0.0865617	0.1147	0.748267	0.927904
chr9	22002902	22009312	-	CDKN2B	3342.4	3331.25	3353.55	1.01005	0.014427	0.1147	0.748267	0.927904
chr1	160061129	160068618	-	IGSF8	2800.32	2735.4	2865.25	1.01207	0.0173123	0.1147	0.748267	0.927904
chr18	70409549	70534810	-	NETO1	3319.5	3383.25	3255.75	1.01308	0.018755	0.1132	0.748882	0.927799
chr1	161632905	161648444	+	FCGR2B	561.375	559	563.75	1.01308	0.018755	0.1131	0.748923	0.927792
chr3	124481795	124606144	-	ITGB5	1685.38	1663.55	1707.2	1.01106	0.0158696	0.1131	0.748923	0.927792
chr17	32683471	32685629	+	CCL13	454.425	436.5	472.35	1.01207	0.0173123	0.1129	0.749005	0.927778
chr10	95351593	95360993	-	RBP4	1142.67	1133.5	1151.85	1.00904	0.0129843	0.112	0.749374	0.927715
chr5	175875356	175937075	+	FAF2	2625.1	2627.85	2622.35	1.01207	0.0173123	0.1114	0.749619	0.927672
chr11	10579413	10590365	-	LYVE1	751.7	734.8	768.6	1.00904	0.0129843	0.1113	0.74966	0.927665
chr4	41258898	41270446	+	UCHL1	37671.7	38587.9	36755.5	1.01511	0.0216404	0.1113	0.74966	0.927665
chr12	44902058	45307711	-	NELL2	1190.58	1178.3	1202.85	1.01005	0.014427	0.1113	0.74966	0.927665
chr12	77252496	77272799	-	CSRP2	18430.3	17412.1	19448.5	1.03149	0.0447235	0.1112	0.7497	0.927658
chr18	56887400	56898002	+	GRP	485.25	480.25	490.25	1.00904	0.0129843	0.1105	0.749986	0.927608
chr20	43922086	43937169	-	MATN4	1461.95	1477.15	1446.75	1.01106	0.0158696	0.1099	0.75023	0.927565
chr15	41851220	41871536	+	TYRO3	854.775	849.2	860.35	1.01106	0.0158696	0.1098	0.750271	0.927558
chr13	28577411	28674729	-	FLT3	5082.4	4929.5	5235.3	1.01308	0.018755	0.1089	0.750637	0.927494
chrX	2670093	2734541	+	XG	1507.65	1509.6	1505.7	1.00904	0.0129843	0.1088	0.750677	0.927486
chr3	190231840	190374986	+	IL1RAP	1518	1495.4	1540.6	1.0141	0.0201977	0.1087	0.750718	0.927479
chr17	9801027	9808684	-	RCVRN	1343.78	1316.35	1371.2	1.01207	0.0173123	0.1085	0.750799	0.927465
chr8	11351521	11422108	+	BLK	677.175	684.45	669.9	1.01005	0.014427	0.1073	0.751285	0.927378
chr12	128751948	129192460	+	TMEM132C	728.875	739.5	718.25	1.01106	0.0158696	0.1071	0.751366	0.927363
chr2	25166505	25194963	-	DNAJC27	1570.97	1569.2	1572.75	1.01005	0.014427	0.1065	0.751609	0.92732
chr8	7345191	7681412	+	DEFB105A	1687.28	1669.25	1705.3	1.01005	0.014427	0.106	0.751811	0.927283
chr10	69681656	69835103	-	HERC4	2658.9	2631.45	2686.35	1.00904	0.0129843	0.1022	0.753338	0.927003
chr7	56131917	56148365	+	SUMF2	12475.8	12400.8	12550.8	1.01613	0.0230831	0.1022	0.753338	0.927003
chr7	44111661	44122139	-	POLM	1950.67	1913.7	1987.65	1.01106	0.0158696	0.1019	0.753458	0.926981
chr19	54818353	54824409	-	LILRA5	678.625	690.1	667.15	1.00904	0.0129843	0.1017	0.753538	0.926966
chr7	116139655	116148595	+	CAV2	1875.4	1847	1903.8	1.00803	0.0115416	0.1003	0.754097	0.926861
chr12	13197315	13236383	+	KIAA1467	1763.92	1785.35	1742.5	1.01106	0.0158696	0.0989	0.754654	0.926756
chr11	124735305	124751370	+	ROBO3	1281.35	1296.8	1265.9	1.01005	0.014427	0.0988	0.754694	0.926748
chr19	49617618	49621717	+	LIN7B	8907.8	9131.9	8683.7	1.01106	0.0158696	0.0985	0.754813	0.926725
chr17	49707674	50237377	-	CA10	2613.53	2599.15	2627.9	1.01005	0.014427	0.0984	0.754852	0.926718
chr1	173446486	173457946	+	PRDX6	169767	157155	182379	1.01511	0.0216404	0.0983	0.754892	0.92671
chr7	106505723	106549423	+	PIK3CG	4837.88	4780.15	4895.6	1.00904	0.0129843	0.0982	0.754932	0.926702
chr9	35673915	35681154	+	CA9	1885.42	1891.9	1878.95	1.01106	0.0158696	0.0975	0.755209	0.926649
chr8	141668481	142011412	-	PTK2	269.775	271.45	268.1	1.01005	0.014427	0.0972	0.755328	0.926626
chr1	159770301	159786047	+	FCRL6	2944.6	2912.45	2976.75	1.01005	0.014427	0.0968	0.755486	0.926596
chr2	233320833	233324742	+	ALPI	1952	1915.1	1988.9	1.00803	0.0115416	0.0963	0.755684	0.926557
chr1	29213603	29446558	+	EPB41	21677.6	22449.7	20905.5	1.02532	0.0360674	0.096	0.755802	0.926534
chr9	21186618	21187598	-	IFNA4	2044.25	2032.15	2056.35	1.00803	0.0115416	0.0956	0.75596	0.926504
chr1	45794914	45806142	-	MUTYH	232.775	231.55	234	1.00803	0.0115416	0.0954	0.756039	0.926488
chr4	9446260	9452240	+	DEFB131	1006.92	1001.1	1012.75	1.00904	0.0129843	0.0944	0.756433	0.926411
chr2	233415297	233448355	+	EIF4E2	20283.8	20216	20351.7	1.01511	0.0216404	0.0942	0.756512	0.926396
chr20	54572413	54580528	-	CBLN4	3031.45	3019.55	3043.35	1.01005	0.014427	0.094	0.75659	0.92638
chr8	75736772	75767264	+	PI15	4133	4155.95	4110.05	1.01005	0.014427	0.0931	0.756944	0.92631
chr11	66360690	66373490	+	CCS	774.775	772.35	777.2	1.00904	0.0129843	0.0931	0.756944	0.92631
chr1	43282776	43310660	+	ERMAP	1204.58	1204.2	1204.95	1.00803	0.0115416	0.0927	0.7571	0.926279
chr11	616565	625067	-	CDHR5	4691.88	4702.2	4681.55	1.00803	0.0115416	0.0926	0.75714	0.926271
chr13	113760102	113774995	+	F7	3540.97	3481.15	3600.8	1.00803	0.0115416	0.0919	0.757414	0.926216
chr1	21132785	21503381	-	EIF4G3	7429.5	7412.5	7446.5	1.00904	0.0129843	0.0911	0.757726	0.926153
chr1	205350506	205391214	-	LEMD1	23459.7	23267.5	23651.8	1.0141	0.0201977	0.09	0.758155	0.926067
chr8	73921097	73959987	+	TERF1	1493.4	1496.8	1490	1.00904	0.0129843	0.0899	0.758194	0.926059
chr9	114803061	114937577	-	SUSD1	505.325	512.8	497.85	1.00904	0.0129843	0.089	0.758544	0.925987
chr17	58227302	58236906	+	CA4	3507	3513.5	3500.5	1.00803	0.0115416	0.0887	0.758661	0.925964
chr3	52489524	52527088	+	NISCH	5884.1	5811.95	5956.25	1.00803	0.0115416	0.0887	0.758661	0.925964
chr6	31620187	31625987	+	APOM	3079.68	3067.2	3092.15	1.05338	0.0750201	0.0885	0.758739	0.925948
chr10	103529887	103540126	-	FGF8	1664.62	1623.05	1706.2	1.01005	0.014427	0.0884	0.758777	0.92594
chr19	41281082	41283398	+	MIA	501.825	500.5	503.15	1.00702	0.0100989	0.0882	0.758855	0.925924
chr14	31343741	31359822	+	COCH	1275.5	1276.05	1274.95	1.00702	0.0100989	0.0881	0.758894	0.925916
chr2	219940046	220025587	-	NHEJ1	301	317.35	284.65	1.0284	0.0403955	0.0881	0.758894	0.925916
chr8	29190579	29208267	-	DUSP4	1362.1	1353.55	1370.65	1.00702	0.0100989	0.0873	0.759204	0.925852
chr1	59041095	59043166	-	TACSTD2	576.65	582.7	570.6	1.00803	0.0115416	0.0861	0.759668	0.925755
chr1	240938814	241520530	-	RGS7	4144.3	4145.45	4143.15	1.00904	0.0129843	0.0861	0.759668	0.925755
chr4	88343728	88380606	+	NUDT9	59712.4	61360.9	58063.8	1.01207	0.0173123	0.0853	0.759976	0.925691
chr19	18501954	18508415	-	LRRC25	2970.15	2989.85	2950.45	1.00904	0.0129843	0.0852	0.760015	0.925682
chr5	130494976	130501041	-	HINT1	5971.27	6082	5860.55	1.01613	0.0230831	0.0848	0.760169	0.92565
chr1	114522013	114524876	+	OLFML3	315	338.55	291.45	1.0202	0.0288539	0.0845	0.760285	0.925626
chr10	7745236	7791483	+	ITIH2	481.25	483.8	478.7	1.00904	0.0129843	0.0827	0.760976	0.925479
chr9	94793416	94877756	-	SPTLC1	10812.3	10742.1	10882.5	1.00904	0.0129843	0.0817	0.761358	0.925397
chr5	79331170	79379107	+	THBS4	325.5	320	331	1.00904	0.0129843	0.0814	0.761473	0.925372
chr19	852291	856246	+	ELANE	1597.75	1635.55	1559.95	1.01207	0.0173123	0.0812	0.76155	0.925356
chr10	16865965	17171816	-	CUBN	199.425	200.85	198	1.00904	0.0129843	0.0803	0.761893	0.925281
chr1	230193536	230417876	+	GALNT2	1063.47	1074.25	1052.7	1.00702	0.0100989	0.0785	0.762578	0.925131
chr3	127348002	127391653	+	PODXL2	1154.5	1142.25	1166.75	1.00602	0.00865617	0.0781	0.762729	0.925098
chr13	50202435	50208008	+	ARL11	51341.4	50244.8	52438.2	1.01207	0.0173123	0.0779	0.762805	0.925081
chr3	40428647	40470117	+	ENTPD3	2838.68	2802.9	2874.45	1.00803	0.0115416	0.0752	0.763825	0.924853
chr9	5231419	5233967	+	INSL4	536.075	528.7	543.45	1.00702	0.0100989	0.075	0.763901	0.924837
chr16	47115431	47177936	-	NETO2	1873.3	1891.45	1855.15	1.00702	0.0100989	0.0746	0.764051	0.924803
chr1	202559725	202679551	-	SYT2	1496.22	1493.75	1498.7	1.00702	0.0100989	0.0744	0.764126	0.924785
chr2	27651473	27665124	+	NRBP1	2605.88	2610.9	2600.85	1.00702	0.0100989	0.0743	0.764164	0.924777
chr10	99195666	99205768	-	EXOSC1	1774.22	1785.9	1762.55	1.00702	0.0100989	0.0742	0.764202	0.924768
chr1	47140831	47184736	-	EFCAB14	1046.9	1058.5	1035.3	1.00702	0.0100989	0.0735	0.764465	0.924709
chr16	30125426	30134630	-	MAPK3	53069.7	51995.3	54143.9	1.0141	0.0201977	0.0728	0.764727	0.924649
chr9	5163863	5185618	-	INSL6	769.5	774.6	764.4	1.00803	0.0115416	0.0726	0.764802	0.924632
chr16	87635441	87731761	+	JPH3	538.675	533.25	544.1	1.00602	0.00865617	0.0721	0.764989	0.924589
chr8	38268656	38326352	-	FGFR1	2264	2245.55	2282.45	1.01715	0.0245258	0.0719	0.765064	0.924571
chr5	147582357	147594700	+	SPINK6	2003.5	1995.95	2011.05	1.00602	0.00865617	0.0718	0.765101	0.924563
chr10	5994334	6020150	-	IL15RA	430.825	426.25	435.4	1.00803	0.0115416	0.0716	0.765176	0.924546
chr10	7792925	7829990	-	KIN	90677.1	84576.9	96777.4	1.01106	0.0158696	0.0714	0.765251	0.924528
chr2	143635195	143799885	+	KYNU	1269.88	1260.25	1279.5	1.00702	0.0100989	0.0714	0.765251	0.924528
chr9	124030380	124095120	+	GSN	26026.6	25156.2	26897	1.01613	0.0230831	0.0713	0.765288	0.92452
chr16	12058964	12061925	+	TNFRSF17	651.1	657.15	645.05	1.00702	0.0100989	0.0711	0.765363	0.924502
chr1	43803475	43820135	+	MPL	286.35	286.1	286.6	1.00602	0.00865617	0.0708	0.765475	0.924476
chr5	69321072	70214357	+	SERF1A	1535.65	1491.75	1579.55	1.00702	0.0100989	0.0703	0.765661	0.924433
chr9	88641058	88715116	-	GOLM1	1100.53	1099.6	1101.45	1.00602	0.00865617	0.0698	0.765847	0.92439
chr1	149856010	149858232	-	HIST2H2BE	177892	165555	190229	1.01005	0.014427	0.0693	0.766033	0.924346
chr1	235530675	235612283	+	TBCE	28107.9	29476.8	26739.1	1.0141	0.0201977	0.0693	0.766033	0.924346
chr8	6728097	6735529	-	DEFB1	2358.3	2315.15	2401.45	1.00702	0.0100989	0.0692	0.76607	0.924337
chr11	63974152	63991363	+	FERMT3	21056.8	21547.5	20566.2	1.01005	0.014427	0.0683	0.766404	0.924259
chr5	61684351	61699728	-	DIMT1	134.875	135.6	134.15	1.00602	0.00865617	0.0681	0.766478	0.924241
chr16	88705001	88706882	+	IL17C	3228.9	3212.25	3245.55	1.00602	0.00865617	0.0678	0.766589	0.924215
chr10	90484301	90512513	+	LIPK	994.95	989.6	1000.3	1.00602	0.00865617	0.0677	0.766626	0.924206
chr15	76234328	76304785	-	NRG4	978.375	1008.85	947.9	1.00702	0.0100989	0.0675	0.766701	0.924189
chr2	8822113	8824583	+	ID2	1506.22	1528.95	1483.5	1.00602	0.00865617	0.0672	0.766812	0.924162
chr6	32916391	32920899	-	HLA-DMA	796.525	784.85	808.2	1.00602	0.00865617	0.0657	0.767365	0.92403
chr8	7705402	7721319	+	SPAG11A	1701.83	1687.45	1716.2	1.00501	0.00721348	0.0653	0.767513	0.923994
chr5	131817301	131826465	-	IRF1	4142.68	4074.2	4211.15	1.00501	0.00721348	0.0647	0.767733	0.923941
chr1	32681798	32687926	-	TMEM234	423.45	418.35	428.55	1.00602	0.00865617	0.0645	0.767807	0.923923
chr2	220144040	220151622	+	DNAJB2	105454	99618.9	111289	1.00702	0.0100989	0.0644	0.767844	0.923914
chr1	67263424	67266942	-	INSL5	1162.58	1138.2	1186.95	1.00501	0.00721348	0.0644	0.767844	0.923914
chr22	24108021	24110141	-	CHCHD10	9863.58	10338.9	9388.3	1.01918	0.0274112	0.064	0.767991	0.923879
chr6	49660071	49681303	-	CRISP2	2072.72	2043.35	2102.1	1.00501	0.00721348	0.064	0.767991	0.923879
chr10	44865601	44880545	-	CXCL12	644.925	618.1	671.75	1.00803	0.0115416	0.0637	0.768101	0.923852
chr8	33405272	33424646	-	RNF122	23614.3	23031.5	24197.1	1.00702	0.0100989	0.0632	0.768284	0.923807
chr1	207262212	207273337	+	C4BPB	4436.2	4360.7	4511.7	1.00602	0.00865617	0.0627	0.768467	0.923762
chr19	44150247	44174498	-	PLAUR	4098.15	4188.35	4007.95	1.01005	0.014427	0.0618	0.768796	0.923682
chr20	48807120	48809227	+	CEBPB	3650.88	3782.55	3519.2	1.00803	0.0115416	0.0611	0.769052	0.923618
chr10	55562533	56561051	-	PCDH15	1236.53	1239.85	1233.2	1.00602	0.00865617	0.061	0.769088	0.923609
chr16	30483983	30534506	+	ITGAL	1439.75	1459.5	1420	1.00702	0.0100989	0.061	0.769088	0.923609
chr4	174089904	174245118	+	GALNT7	644.9	650.65	639.15	1.00803	0.0115416	0.061	0.769088	0.923609
chr12	25205181	25261269	+	LRMP	677.325	678.9	675.75	1.00501	0.00721348	0.0609	0.769124	0.9236
chr13	114303122	114312513	-	ATP4B	4236.38	4178.15	4294.6	1.00501	0.00721348	0.0609	0.769124	0.9236
chr11	64037300	64052176	-	BAD	10538.2	10310.4	10766	1.00702	0.0100989	0.0608	0.769161	0.923591
chr7	142638201	142659503	-	KEL	571.2	578.65	563.75	1.00602	0.00865617	0.0607	0.769197	0.923582
chr17	39775692	39780882	-	KRT17	4139.35	4192.25	4086.45	1.00803	0.0115416	0.0606	0.769234	0.923573
chr7	42956462	42971805	-	PSMA2	7248.68	7087	7410.35	1.00803	0.0115416	0.0601	0.769416	0.923528
chr11	134118173	134123260	-	THYN1	10967.5	11065.5	10869.5	1.00702	0.0100989	0.0589	0.769852	0.923419
chr19	51645558	51656783	+	SIGLEC7	442.55	441.65	443.45	1.00501	0.00721348	0.0584	0.770033	0.923373
chr20	3024268	3026391	+	GNRH2	442.275	437.6	446.95	1.00501	0.00721348	0.0579	0.770214	0.923327
chr22	37678495	37711389	+	CYTH4	22682.3	22843.6	22521	1.01005	0.014427	0.0578	0.77025	0.923318
chr1	101337928	101360735	-	EXTL2	3564.1	3662.65	3465.55	1.00602	0.00865617	0.0569	0.770575	0.923235
chr20	13202418	13281297	+	ISM1	1421.65	1409.15	1434.15	1.00501	0.00721348	0.0567	0.770648	0.923217
chr18	13218729	13652753	+	LDLRAD4	93846.2	92041.7	95650.6	1.00702	0.0100989	0.0565	0.77072	0.923199
chr1	51567906	51613754	+	C1orf185	709.725	711.5	707.95	1.00602	0.00865617	0.0562	0.770828	0.923171
chr15	60639350	60690185	-	ANXA2	125411	117551	133270	1.00904	0.0129843	0.0561	0.770864	0.923162
chr18	2571510	2616634	+	NDC80	41954.8	40087.1	43822.6	1.00702	0.0100989	0.0545	0.77144	0.923013
chr10	135138928	135150475	-	CALY	689.275	679.25	699.3	1.00401	0.00577078	0.0545	0.77144	0.923013
chr1	228645065	228645560	-	HIST3H2A	174698	168299	181098	1.00803	0.0115416	0.0544	0.771475	0.923004
chr3	135684515	135866752	+	PPP2R3A	942.725	944.1	941.35	1.00401	0.00577078	0.0543	0.771511	0.922995
chr17	34522269	34625731	-	CCL3L1	3653.25	3629.25	3677.25	1.00501	0.00721348	0.0543	0.771511	0.922995
chr20	3052266	3053163	+	OXT	1621.67	1628.15	1615.2	1.00501	0.00721348	0.0541	0.771583	0.922976
chr17	62006098	62009704	-	CD79B	2475.9	2441	2510.8	1.00501	0.00721348	0.0519	0.77237	0.92277
chr9	38406525	38424444	-	IGFBPL1	1123.9	1153.85	1093.95	1.00501	0.00721348	0.0514	0.772548	0.922723
chr6	150204511	150217195	-	RAET1E	3287.18	3285.25	3289.1	1.00501	0.00721348	0.0507	0.772798	0.922657
chr8	22004343	22014344	-	LGI3	923.825	924.9	922.75	1.00501	0.00721348	0.0506	0.772833	0.922648
chr9	8314246	10612723	-	PTPRD	768.825	767.9	769.75	1.00401	0.00577078	0.0503	0.77294	0.92262
chr1	180123968	180167169	+	QSOX1	2307.95	2330.95	2284.95	1.00803	0.0115416	0.0501	0.773011	0.922601
chr6	127440048	127520626	+	RSPO3	1467	1491.5	1442.5	1.00501	0.00721348	0.05	0.773046	0.922591
chr19	49141272	49149451	-	CA11	262.025	261.2	262.85	1.00401	0.00577078	0.0499	0.773082	0.922582
chr4	74347462	74369718	+	AFM	4432.1	4374.25	4489.95	1.00501	0.00721348	0.0499	0.773082	0.922582
chr16	29464914	30205627	-	BOLA2	200.55	199.2	201.9	1.00501	0.00721348	0.0499	0.773082	0.922582
chr2	158271131	158300604	-	CYTIP	445.875	445.85	445.9	1.00401	0.00577078	0.0496	0.773188	0.922553
chr11	67776017	67796749	+	ALDH3B1	902.7	900.4	905	1.00501	0.00721348	0.0496	0.773188	0.922553
chr19	54844692	54850421	-	LILRA4	2119.45	2107.4	2131.5	1.00401	0.00577078	0.0496	0.773188	0.922553
chr12	124069076	124082688	+	TMED2	11786.2	12332	11240.5	1.00702	0.0100989	0.0495	0.773224	0.922544
chr12	47469490	47473734	-	AMIGO2	980.875	990.3	971.45	1.00501	0.00721348	0.0495	0.773224	0.922544
chr19	11546078	11561782	+	PRKCSH	9596.75	10084.2	9109.3	1.00602	0.00865617	0.0494	0.773259	0.922534
chr17	32597235	32599261	+	CCL7	796.225	806.25	786.2	1.00501	0.00721348	0.0492	0.77333	0.922515
chr4	88928799	88998931	+	PKD2	809.3	806.15	812.45	1.00401	0.00577078	0.0484	0.773614	0.922439
chr15	67493013	67547536	-	AAGAB	14054.3	13858.5	14250	1.00602	0.00865617	0.0478	0.773826	0.922382
chr9	99791959	99801925	-	CTSV	473.25	466.95	479.55	1.00401	0.00577078	0.0465	0.774284	0.922257
chr21	34961648	35014160	-	CRYZL1	4903.7	4939.2	4868.2	1.00602	0.00865617	0.0462	0.77439	0.922228
chr12	52979373	52995322	-	KRT72	376.425	378.45	374.4	1.00401	0.00577078	0.0462	0.77439	0.922228
chr12	113495662	113535833	+	DTX1	2733.57	2735.7	2731.45	1.00401	0.00577078	0.046	0.77446	0.922209
chr17	8271973	8274858	-	KRBA2	1097.3	1096.7	1097.9	1.00401	0.00577078	0.0439	0.775197	0.922006
chr19	49535130	49536495	+	CGB2	1169.05	1179.85	1158.25	1.00401	0.00577078	0.0439	0.775197	0.922006
chr8	82192718	82197012	+	FABP5	1843.25	1825.65	1860.85	1.003	0.00432809	0.0434	0.775372	0.921957
chr2	85569078	85581821	-	RETSAT	1066.8	1071.75	1061.85	1.00401	0.00577078	0.0424	0.775722	0.92186
chr12	132312941	132336316	+	MMP17	1686.45	1657.2	1715.7	1.00602	0.00865617	0.0424	0.775722	0.92186
chr2	3622853	3628509	+	RPS7	42970.4	44572.6	41368.2	1.00501	0.00721348	0.0422	0.775791	0.92184
chr5	74323289	74326724	-	GCNT4	4257.62	4234.95	4280.3	1.00401	0.00577078	0.0421	0.775826	0.92183
chr10	82167585	82192753	+	FAM213A	1624.62	1636.1	1613.15	1.003	0.00432809	0.042	0.775861	0.92182
chr11	46299189	46342972	+	CREB3L1	2767.57	2822.45	2712.7	1.00501	0.00721348	0.0415	0.776035	0.921771
chr1	59246463	59249785	-	JUN	3498.57	3478.6	3518.55	1.00401	0.00577078	0.0415	0.776035	0.921771
chr17	72462522	72480937	+	CD300A	1468.9	1485.1	1452.7	1.00401	0.00577078	0.0412	0.776139	0.921742
chr12	104850692	105155792	+	CHST11	2523.22	2449.3	2597.15	1.00401	0.00577078	0.0412	0.776139	0.921742
chr2	264869	278282	+	ACP1	6419.45	5911.15	6927.75	1.00702	0.0100989	0.0411	0.776174	0.921732
chr17	72606022	72619897	-	CD300E	2385.93	2375.2	2396.65	1.003	0.00432809	0.041	0.776209	0.921722
chr19	5455426	5456867	+	ZNRF4	868.75	877.55	859.95	1.00401	0.00577078	0.0402	0.776487	0.921644
chr17	72537205	72542310	-	CD300C	1208.35	1203.05	1213.65	1.00401	0.00577078	0.0398	0.776626	0.921604
chr17	76352858	76356160	-	SOCS3	14257.7	14015.2	14500.1	1.003	0.00432809	0.0393	0.776799	0.921555
chr1	2487805	2495267	+	TNFRSF14	2080.62	2059.45	2101.8	1.00401	0.00577078	0.0389	0.776937	0.921515
chr1	158149737	158156216	+	CD1D	900.875	922.3	879.45	1.003	0.00432809	0.0387	0.777006	0.921495
chr15	64448014	64455354	-	PPIB	19284.5	19639.5	18929.6	1.00401	0.00577078	0.0376	0.777386	0.921386
chr17	34391643	34398841	+	CCL18	660.25	659	661.5	1.003	0.00432809	0.0375	0.777421	0.921376
chr6	35265595	35289548	+	DEF6	1678.1	1711.45	1644.75	1.00401	0.00577078	0.0371	0.777558	0.921336
chr7	141627157	141646783	-	CLEC5A	794.025	803.05	785	1.00401	0.00577078	0.0364	0.777799	0.921266
chr11	69587797	69590171	-	FGF4	420.7	423.65	417.75	1.003	0.00432809	0.0362	0.777868	0.921246
chr16	19179638	19278554	+	SYT17	1062.88	1033.7	1092.05	1.00401	0.00577078	0.0346	0.778417	0.921085
chr2	62132803	62363205	+	COMMD1	3690.7	3743.8	3637.6	1.00401	0.00577078	0.0342	0.778553	0.921045
chr7	75677337	75696827	+	MDH2	216964	207482	226446	1.00501	0.00721348	0.0338	0.77869	0.921004
chr4	154701742	154710228	-	SFRP2	1845.62	1837.95	1853.3	1.003	0.00432809	0.0329	0.778997	0.920913
chr14	64319683	64693167	+	SYNE2	20786.7	19519.1	22054.3	1.00501	0.00721348	0.0328	0.779031	0.920903
chr1	11905767	11907840	-	NPPA	2370.72	2405	2336.45	1.00401	0.00577078	0.0327	0.779065	0.920893
chr17	7517382	7536701	+	SHBG	905.475	917.9	893.05	1.003	0.00432809	0.0324	0.779168	0.920862
chr11	111411233	111432470	+	LAYN	3643.88	3519.25	3768.5	1.00501	0.00721348	0.0324	0.779168	0.920862
chr4	76831808	76862166	-	NAAA	5164.57	5946.7	4382.45	1.01106	0.0158696	0.0319	0.779338	0.920811
chr2	102803433	102855811	+	IL1RL2	985.4	989.05	981.75	1.003	0.00432809	0.0317	0.779406	0.920791
chr4	89378268	89427319	+	HERC5	6382.6	6274.95	6490.25	1.003	0.00432809	0.0315	0.779474	0.92077
chr8	70584568	70747299	-	SLCO5A1	532.65	523.95	541.35	1.003	0.00432809	0.0311	0.779609	0.92073
chr2	20191813	20212455	-	MATN3	1471.7	1459.55	1483.85	1.00401	0.00577078	0.031	0.779643	0.920719
chr3	194060494	194072057	-	CPN2	698.375	686.85	709.9	1.003	0.00432809	0.0309	0.779677	0.920709
chr20	31407699	31438211	+	MAPRE1	166245	162208	170283	1.00401	0.00577078	0.0298	0.78005	0.920596
chr7	48026746	48068716	-	SUN3	1330.3	1327.45	1333.15	1.002	0.00288539	0.0298	0.78005	0.920596
chr4	54326437	54457753	-	LNX1	927.075	928.3	925.85	1.003	0.00432809	0.0297	0.780084	0.920586
chr5	110405778	110413722	+	TSLP	623.45	618.05	628.85	1.003	0.00432809	0.0296	0.780117	0.920576
chrX	142710595	142723926	-	SLITRK4	1002.17	1008.75	995.6	1.003	0.00432809	0.0289	0.780354	0.920504
chr9	18474079	18910947	+	ADAMTSL1	2641.47	2658.8	2624.15	1.002	0.00288539	0.0287	0.780421	0.920483
chr19	56687389	56697144	+	GALP	812.875	816.3	809.45	1.003	0.00432809	0.0283	0.780556	0.920442
chr12	3918027	3982614	-	PARP11	1745.42	1741.3	1749.55	1.003	0.00432809	0.0283	0.780556	0.920442
chr15	75315927	75343067	+	PPCDC	934.425	928.35	940.5	1.002	0.00288539	0.0273	0.780893	0.920338
chr14	35514113	35552589	+	FAM177A1	7602.8	7734.45	7471.15	1.00401	0.00577078	0.0269	0.781027	0.920296
chr1	76540389	77096669	+	ST6GALNAC3	477.075	486.1	468.05	1.003	0.00432809	0.0268	0.781061	0.920286
chr13	53602876	53626196	+	OLFM4	142543	133790	151296	1.00401	0.00577078	0.0267	0.781094	0.920276
chr17	52978052	53039328	+	TOM1L1	13433	13037	13828.9	1.003	0.00432809	0.0255	0.781497	0.920151
chr14	58862644	58875419	+	TOMM20L	12373	12382.7	12363.2	1.003	0.00432809	0.0238	0.782065	0.919972
chr2	113531492	113542971	-	IL1A	1627.85	1648.9	1606.8	1.002	0.00288539	0.0237	0.782098	0.919962
chr3	141595470	141645382	+	ATP1B3	54904.2	57308.9	52499.4	1.003	0.00432809	0.0234	0.782198	0.91993
chr5	132009678	132018370	+	IL4	660.1	661.85	658.35	1.002	0.00288539	0.0223	0.782564	0.919814
chr16	23690201	23701688	+	PLK1	556.7	544.25	569.15	1.002	0.00288539	0.0213	0.782895	0.919708
chr12	6561177	6571488	+	TAPBPL	2767.57	2471.45	3063.7	1.00803	0.0115416	0.0207	0.783094	0.919644
chr1	64058947	64125916	+	PGM1	1692.75	1728.7	1656.8	1.00401	0.00577078	0.0206	0.783127	0.919634
chr18	33234533	33291798	+	GALNT1	3669.15	3699.25	3639.05	1.002	0.00288539	0.0206	0.783127	0.919634
chr7	100400187	100425143	-	EPHB4	56083.1	56048.7	56117.6	1.002	0.00288539	0.0201	0.783292	0.91958
chr11	122928200	122933043	-	HSPA8	26616.8	27365.2	25868.5	1.003	0.00432809	0.0196	0.783457	0.919527
chr19	55385549	55401839	+	FCAR	695.225	706	684.45	1.002	0.00288539	0.0195	0.78349	0.919516
chr11	61197597	61214239	+	SDHAF2	87181.7	82331.4	92032.1	1.003	0.00432809	0.018	0.783984	0.919355
chr7	151722778	151819427	+	GALNT11	3204	3186.6	3221.4	1.002	0.00288539	0.0176	0.784115	0.919312
chr14	77972340	78083110	-	SPTLC2	1994.38	2037.15	1951.6	1.002	0.00288539	0.0169	0.784345	0.919237
chr3	187439165	187463513	-	BCL6	566.775	571.05	562.5	1.001	0.0014427	0.0167	0.78441	0.919215
chr19	5865837	5870551	-	FUT5	289.875	288.55	291.2	1.002	0.00288539	0.0166	0.784443	0.919204
chr4	8594387	8621488	+	CPZ	1095.88	1106.15	1085.6	1.002	0.00288539	0.0163	0.784541	0.919172
chr10	118350490	118368686	+	PNLIPRP1	2258.47	2234.8	2282.15	1.001	0.0014427	0.016	0.784639	0.919139
chr1	52485804	52521843	-	TXNDC12	4902.62	4760.3	5044.95	1.002	0.00288539	0.0158	0.784705	0.919118
chr16	57392695	57400102	+	CCL22	436.025	428.1	443.95	1.001	0.0014427	0.0157	0.784737	0.919107
chr6	37137922	37143204	+	PIM1	2405.68	2376.7	2434.65	1.002	0.00288539	0.0153	0.784868	0.919063
chr10	33466419	33623833	-	NRP1	5225.23	4819.4	5631.05	1.00501	0.00721348	0.015	0.784966	0.919031
chr11	18433853	18472793	+	LDHC	541.2	544.05	538.35	1.001	0.0014427	0.0146	0.785096	0.918987
chr17	74561461	74582145	-	ST6GALNAC2	4290.5	4266.2	4314.8	1.001	0.0014427	0.0141	0.785259	0.918933
chr12	7623412	7656414	-	CD163	650.025	658.3	641.75	1.001	0.0014427	0.0136	0.785421	0.918878
chr5	98104999	98132198	+	RGMB	3066.7	2990.15	3143.25	1.003	0.00432809	0.0129	0.785649	0.918802
chr5	126378250	126409184	-	C5orf63	7620.75	7545.45	7696.05	1.002	0.00288539	0.0127	0.785713	0.91878
chr1	7831329	7841492	+	VAMP3	649.375	662.45	636.3	1.001	0.0014427	0.0126	0.785746	0.918769
chr14	50110270	50155098	-	POLE2	1441.83	1535.05	1348.6	1.00501	0.00721348	0.012	0.78594	0.918703
chr9	116207009	116360023	+	RGS3	885	875.1	894.9	1.001	0.0014427	0.0116	0.78607	0.918659
chr2	206547224	206662857	+	NRP2	680.325	732.75	627.9	1.00501	0.00721348	0.0116	0.78607	0.918659
chr6	33267472	33282164	-	TAPBP	14159	13730	14588	1.002	0.00288539	0.0112	0.786199	0.918615
chr3	52529356	52558511	+	STAB1	1063.85	1068.6	1059.1	1.001	0.0014427	0.0108	0.786328	0.91857
chr20	29845467	29847435	+	DEFB115	669.2	679.95	658.45	1.001	0.0014427	0.0108	0.786328	0.91857
chr3	9799029	9811668	-	CAMK1	28881.1	29256.3	28505.8	1.001	0.0014427	0.0106	0.786392	0.918548
chr8	8993764	9009152	-	PPP1R3B	1936.6	1952.1	1921.1	1.001	0.0014427	0.0106	0.786392	0.918548
chr3	115521210	116164385	-	LSAMP	910.05	921.2	898.9	1.001	0.0014427	0.0099	0.786618	0.918471
chr19	7828035	7834491	+	CLEC4M	97966.1	92317.9	103614	1.001	0.0014427	0.0099	0.786618	0.918471
chr16	49311829	49315742	-	CBLN1	1295.05	1297.75	1292.35	1.001	0.0014427	0.0094	0.786779	0.918415
chr2	215590370	215674435	-	BARD1	1246.33	1255.15	1237.5	1.001	0.0014427	0.0094	0.786779	0.918415
chr9	74729511	74867140	+	GDA	7931.35	7789.55	8073.15	1.001	0.0014427	0.0087	0.787004	0.918338
chr14	50359736	50363772	+	ARF6	4119.57	4228.35	4010.8	1.001	0.0014427	0.0084	0.7871	0.918304
chr22	44639557	44708731	-	KIAA1644	333.15	331.5	334.8	1.001	0.0014427	0.0069	0.78758	0.918137
chr1	186640944	186649559	-	PTGS2	3224.82	3274.05	3175.6	1.001	0.0014427	0.0066	0.787676	0.918103
chr7	43966035	43995735	+	UBE2D4	14403.5	14441.3	14365.8	1.001	0.0014427	0.0062	0.787804	0.918058
chr1	167022082	167059868	-	GPA33	1547.83	1543.05	1552.6	1.001	0.0014427	0.0059	0.787899	0.918024
chr11	65764016	65769637	-	EIF1AD	7875.85	7814.85	7936.85	1.001	0.0014427	0.0052	0.788122	0.917945
chr1	153509623	153514241	-	S100A5	9601.08	9463.35	9738.8	1.001	0.0014427	0.005	0.788186	0.917923
chr11	63320242	63330855	-	HRASLS2	915.05	921.8	908.3	1	0	0.0046	0.788313	0.917878
chr18	66340925	66382353	-	TMX3	95929.9	97460.2	94399.5	1.001	0.0014427	0.0037	0.788598	0.917776
chr3	17198654	17782399	-	TBC1D5	2425.28	2307.3	2543.25	1.001	0.0014427	0.0037	0.788598	0.917776
chr6	55192267	55267291	+	GFRAL	1441.75	1453.5	1430	1	0	0.0035	0.788662	0.917753
chr17	73232687	73258474	-	GGA3	9076.92	9452.8	8701.05	1	0	0.0033	0.788725	0.91773
chr7	144149034	144533146	-	TPK1	1636.62	1639.45	1633.8	1	0	0.0028	0.788883	0.917674
chr8	42231586	42234674	-	DKK4	16176.2	17264.5	15088	1.001	0.0014427	0.0025	0.788978	0.91764
chr1	33979599	34631443	-	CSMD2	60891.8	60222.7	61560.8	1	0	0.0015	0.789293	0.917525
chr8	1993158	2093380	+	MYOM2	2377.88	2435.1	2320.65	1	0	0.0009	0.789482	0.917457
chr10	120927215	120938377	-	PRDX3	15973	15645.9	16300	1	0	0.0006	0.789577	0.917422
chr1	220863628	220872499	+	C1orf115	1621.95	1615.5	1628.4	1	0	0.0004	0.78964	0.9174
chr19	11685475	11689801	-	ACP5	5875.35	5601.5	6149.2	1	0	-0.0003	0.789859	0.917319
chr7	29035247	29186153	-	CPVL	1422.9	1416.45	1429.35	1	0	-0.0011	0.79011	0.917227
chr11	98891706	100229616	+	CNTN5	623.525	608.7	638.35	1	0	-0.002	0.790391	0.917123
chr11	74165886	74178600	-	KCNE3	798.525	791.85	805.2	1	0	-0.0022	0.790454	0.9171
chr19	43511809	43530631	-	PSG11	2480.47	2477.95	2483	1	0	-0.0026	0.790579	0.917054
chr1	151512781	151556059	+	TUFT1	11278.1	11052.9	11503.3	1	0	-0.0028	0.790641	0.91703
chr17	66031848	66042970	+	KPNA2	13917.2	14581.9	13252.5	0.999	-0.0014427	-0.0029	0.790672	0.917019
chr15	35044642	35046782	-	GJD2	914.9	923.15	906.65	1	0	-0.0044	0.791139	0.916844
chr17	7452375	7461207	+	TNFSF12	696.8	687.1	706.5	0.999	-0.0014427	-0.0047	0.791232	0.916809
chr22	18893736	18899601	+	DGCR6	1593.33	1593.8	1592.85	1	0	-0.0053	0.791418	0.916739
chr7	142479908	142481378	+	PRSS2	349.85	357.6	342.1	0.999	-0.0014427	-0.0058	0.791572	0.91668
chr2	228678558	228682280	+	CCL20	322.95	318.1	327.8	0.999	-0.0014427	-0.0061	0.791665	0.916645
chr14	24974712	24977471	-	CMA1	1059.97	1057.65	1062.3	0.999	-0.0014427	-0.0069	0.791912	0.916551
chr17	47653298	47661171	+	NXPH3	4787.88	4892.55	4683.2	0.999	-0.0014427	-0.0072	0.792004	0.916516
chr22	43013846	43045405	-	CYB5R3	4261.9	4161.55	4362.25	0.999	-0.0014427	-0.0078	0.792189	0.916445
chr11	63341944	63381941	-	PLA2G16	1064.05	1068	1060.1	0.999	-0.0014427	-0.0079	0.79222	0.916433
chr8	27454434	27472328	-	CLU	441.8	448.8	434.8	0.999	-0.0014427	-0.0081	0.792281	0.91641
chr5	142657496	142815077	-	NR3C1	323.125	315.5	330.75	0.999	-0.0014427	-0.0091	0.792588	0.916291
chr5	92953431	93447404	-	FAM172A	882.65	904.25	861.05	0.999	-0.0014427	-0.0093	0.79265	0.916267
chr15	73043708	73076126	-	ADPGK	1258.5	1281.3	1235.7	0.999	-0.0014427	-0.0095	0.792711	0.916244
chr15	29992357	30114706	-	TJP1	1435.9	1424.05	1447.75	0.999	-0.0014427	-0.0099	0.792834	0.916196
chr2	11052063	11054351	+	KCNF1	2465.28	2413.45	2517.1	0.999	-0.0014427	-0.01	0.792864	0.916184
chr1	172628185	172636012	+	FASLG	1019.65	1023.55	1015.75	0.999	-0.0014427	-0.0105	0.793017	0.916125
chr12	27915599	27924209	-	MANSC4	592	591.5	592.5	0.999	-0.0014427	-0.0106	0.793048	0.916113
chr5	121187650	121188523	+	FTMT	19635.6	19425.5	19845.8	0.999	-0.0014427	-0.0107	0.793078	0.916101
chr5	180467225	180488523	+	BTNL9	898.125	912.75	883.5	0.999	-0.0014427	-0.0117	0.793383	0.915981
chr18	72201692	72252261	+	CNDP1	861.8	865.15	858.45	0.999	-0.0014427	-0.0118	0.793413	0.915969
chr19	36014269	36019253	-	SBSN	1089.6	1078.3	1100.9	0.999	-0.0014427	-0.0128	0.793718	0.915849
chr10	102283486	102289680	-	NDUFB8	1911.15	1884.5	1937.8	0.999	-0.0014427	-0.0136	0.79396	0.915753
chr8	74888377	74895018	+	TMEM70	825.45	825.05	825.85	0.999	-0.0014427	-0.0136	0.79396	0.915753
chr6	391739	411443	+	IRF4	525.375	523.15	527.6	0.999	-0.0014427	-0.0137	0.793991	0.915741
chr8	71024267	71316020	-	NCOA2	2460.5	2446.15	2474.85	0.999	-0.0014427	-0.0143	0.794172	0.915669
chr12	57345216	57351418	-	RDH16	14436.3	14047.5	14825.1	0.998002	-0.00288539	-0.0143	0.794172	0.915669
chr5	131528304	131563556	-	P4HA2	8094.25	8231.3	7957.2	0.999	-0.0014427	-0.0157	0.794595	0.915499
chr5	149781200	149792499	-	CD74	763.8	774.65	752.95	0.998002	-0.00288539	-0.016	0.794685	0.915463
chr11	405716	417397	-	SIGIRR	2595.07	2598.6	2591.55	0.999	-0.0014427	-0.0162	0.794745	0.915438
chr16	89786776	89807332	+	ZNF276	14892.9	14791.5	14994.1	0.998002	-0.00288539	-0.0163	0.794776	0.915426
chr1	1370903	1378262	+	VWA1	509.775	505.45	514.1	0.998002	-0.00288539	-0.0165	0.794836	0.915402
chr10	60028862	60049019	+	CISD1	1900.95	1901.95	1899.95	0.999	-0.0014427	-0.0165	0.794836	0.915402
chr5	139493708	139499001	+	PURA	3207.85	3243.95	3171.75	0.998002	-0.00288539	-0.0166	0.794866	0.91539
chr1	147374946	147381395	+	GJA8	617.175	617.95	616.4	0.998002	-0.00288539	-0.0178	0.795226	0.915243
chr3	120315128	120321258	+	NDUFB4	6829.6	6348	7311.2	0.997004	-0.00432809	-0.0179	0.795256	0.915231
chr21	34638665	34669539	+	IL10RB	936.225	930.8	941.65	0.998002	-0.00288539	-0.0181	0.795316	0.915207
chr5	76248680	76265299	+	CRHBP	1310.75	1280.25	1341.25	0.998002	-0.00288539	-0.0181	0.795316	0.915207
chr13	52951303	52980629	-	THSD1	3218.05	3246.9	3189.2	0.998002	-0.00288539	-0.0183	0.795376	0.915182
chr15	40763160	40765357	+	CHST14	1465.22	1489.3	1441.15	0.998002	-0.00288539	-0.0185	0.795436	0.915158
chr8	124025404	124054663	-	DERL1	26003	27174.5	24831.7	0.997004	-0.00432809	-0.0185	0.795436	0.915158
chr6	121756723	121770890	+	GJA1	1131.17	1146.75	1115.6	0.998002	-0.00288539	-0.0187	0.795496	0.915133
chr17	7218951	7232638	-	NEURL4	3413.07	3359.95	3466.2	0.998002	-0.00288539	-0.0191	0.795615	0.915084
chr12	62102029	62586620	-	FAM19A2	612.45	614.15	610.75	0.998002	-0.00288539	-0.0197	0.795794	0.91501
chr10	121410882	121437329	+	BAG3	3842.05	3862.95	3821.15	0.998002	-0.00288539	-0.0199	0.795854	0.914986
chr1	1189292	1209234	-	UBE2J2	447.275	448.6	445.95	0.998002	-0.00288539	-0.0203	0.795973	0.914937
chr12	52301202	52317145	+	ACVRL1	2009.7	2010.8	2008.6	0.998002	-0.00288539	-0.0204	0.796003	0.914924
chr13	92050873	93519487	+	GPC5	777.75	784.7	770.8	0.998002	-0.00288539	-0.0207	0.796092	0.914887
chr9	139632619	139637411	-	LCN10	1866.72	1863.75	1869.7	0.998002	-0.00288539	-0.0227	0.796685	0.914639
chr14	56585093	56768031	+	PELI2	1436.22	1428.9	1443.55	0.998002	-0.00288539	-0.0227	0.796685	0.914639
chr3	52828784	52843025	+	ITIH3	2356.57	2359.95	2353.2	0.998002	-0.00288539	-0.0228	0.796715	0.914627
chr19	51479735	51487320	-	KLK7	214.25	221.9	206.6	0.997004	-0.00432809	-0.0232	0.796833	0.914577
chr5	43381600	43412488	-	CCL28	1818.47	1813.55	1823.4	0.998002	-0.00288539	-0.0238	0.79701	0.914502
chr22	25615612	25627836	+	CRYBB2	2035.65	2056.55	2014.75	0.998002	-0.00288539	-0.0241	0.797099	0.914465
chr10	88695298	88717425	-	MMRN2	707.475	706.1	708.85	0.998002	-0.00288539	-0.0242	0.797128	0.914453
chr13	93879078	95060273	+	GPC6	13607.2	12801.2	14413.2	0.997004	-0.00432809	-0.0243	0.797158	0.91444
chr6	86159302	86205509	+	NT5E	611.95	615.95	607.95	0.997004	-0.00432809	-0.0247	0.797276	0.91439
chr15	81489219	81605104	+	IL16	986.25	997.85	974.65	0.998002	-0.00288539	-0.0247	0.797276	0.91439
chr3	52009042	52015216	+	ABHD14A	107730	107195	108265	0.997004	-0.00432809	-0.0248	0.797305	0.914378
chr1	47649261	47655771	-	PDZK1IP1	2078.85	2090.1	2067.6	0.998002	-0.00288539	-0.0248	0.797305	0.914378
chr12	104697510	104698982	+	EID3	1664.45	1644.05	1684.85	0.994018	-0.00865617	-0.025	0.797364	0.914352
chr18	71920527	71959251	-	CYB5A	1156.88	1165.9	1147.85	0.997004	-0.00432809	-0.0253	0.797452	0.914315
chr6	31783291	31785719	+	HSPA1A	6145.68	6351.2	5940.15	0.995012	-0.00721348	-0.0256	0.79754	0.914277
chr14	93170152	93215047	-	LGMN	22471.5	22916	22026.8	0.997004	-0.00432809	-0.0258	0.797599	0.914252
chr12	10269376	10282868	-	CLEC7A	1888	1841.05	1934.95	0.997004	-0.00432809	-0.026	0.797658	0.914227
chr1	236681514	236716279	+	LGALS8	2848.4	2647.9	3048.9	0.994018	-0.00865617	-0.0275	0.798097	0.914038
chr20	23728190	23731574	-	CST1	751.35	754.4	748.3	0.998002	-0.00288539	-0.0275	0.798097	0.914038
chr9	123940415	123964365	-	RAB14	15908.3	15443.8	16372.8	0.996008	-0.00577078	-0.0276	0.798126	0.914025
chr22	46546499	46639653	+	PPARA	5614.95	5747.85	5482.05	0.997004	-0.00432809	-0.0282	0.798301	0.91395
chr5	179224598	179233952	-	MGAT4B	507.8	513.9	501.7	0.997004	-0.00432809	-0.0296	0.798708	0.913772
chr7	98246597	98259181	+	NPTX2	5163.8	5057.95	5269.65	0.997004	-0.00432809	-0.0298	0.798767	0.913746
chr11	14988215	14993832	-	CALCA	507.525	515.35	499.7	0.997004	-0.00432809	-0.0301	0.798854	0.913708
chr6	31686425	31689511	-	LY6G6C	114521	111510	117532	0.997004	-0.00432809	-0.0301	0.798854	0.913708
chr4	70454135	70518967	-	UGT2A1	13222.5	12979	13465.9	0.997004	-0.00432809	-0.0308	0.799057	0.913619
chr9	137801431	137809806	-	FCN1	1585.2	1582.4	1588	0.996008	-0.00577078	-0.0309	0.799086	0.913606
chr2	68592322	68624585	+	PLEK	904.2	940.3	868.1	0.985112	-0.0216404	-0.0313	0.799201	0.913555
chr11	125774261	125793006	+	DDX25	705.75	710.75	700.75	0.997004	-0.00432809	-0.0315	0.799259	0.913529
chr8	23699434	23712320	-	STC1	474.8	549.6	400	0.987084	-0.018755	-0.0322	0.799461	0.91344
chr4	70706930	70725870	-	SULT1E1	10907.7	10417.7	11397.6	0.996008	-0.00577078	-0.0324	0.799519	0.913414
chrX	154487519	154493874	-	RAB39B	3143.03	3114.65	3171.4	0.997004	-0.00432809	-0.0325	0.799548	0.913401
chr20	30225691	30232800	+	COX4I2	4001.4	3962.3	4040.5	0.997004	-0.00432809	-0.0326	0.799577	0.913388
chr5	136310987	136835018	-	SPOCK1	44729.5	43215.1	46243.9	0.996008	-0.00577078	-0.0331	0.799721	0.913324
chr17	28575213	28619184	-	BLMH	295.975	293.8	298.15	0.997004	-0.00432809	-0.0332	0.799749	0.913311
chr6	24426062	24489850	-	GPLD1	664.4	666.4	662.4	0.997004	-0.00432809	-0.0334	0.799807	0.913286
chr4	15606007	15657035	-	FBXL5	610.65	601	620.3	0.997004	-0.00432809	-0.0335	0.799836	0.913273
chr20	31755960	31769223	+	BPIFA2	1366.72	1356.2	1377.25	0.997004	-0.00432809	-0.0335	0.799836	0.913273
chr11	64701943	64703360	-	GPHA2	1929.47	1922.3	1936.65	0.997004	-0.00432809	-0.0336	0.799864	0.91326
chr5	52083774	52098452	+	PELO	4008.22	3971.55	4044.9	0.995012	-0.00721348	-0.0343	0.800065	0.913169
chr20	45128269	45142198	-	ZNF334	938.15	951.75	924.55	0.997004	-0.00432809	-0.0344	0.800094	0.913157
chr8	101521980	101572014	-	ANKRD46	1877.92	1886.5	1869.35	0.997004	-0.00432809	-0.0345	0.800123	0.913144
chr3	10342613	10362872	-	SEC13	27179.8	28041.1	26318.5	0.996008	-0.00577078	-0.0346	0.800151	0.913131
chr11	7273181	7490276	+	SYT9	506.9	503.3	510.5	0.997004	-0.00432809	-0.0348	0.800209	0.913105
chr1	21922708	21995856	-	RAP1GAP	4859.45	4870.05	4848.85	0.995012	-0.00721348	-0.0355	0.800409	0.913014
chr1	71868625	72748277	-	NEGR1	831.4	845.25	817.55	0.997004	-0.00432809	-0.0357	0.800466	0.912988
chr9	87283373	87641985	+	NTRK2	554.625	554.75	554.5	0.997004	-0.00432809	-0.0359	0.800523	0.912962
chr19	54597933	54605994	-	OSCAR	1470.97	1481.85	1460.1	0.996008	-0.00577078	-0.0359	0.800523	0.912962
chr6	25652429	25702008	+	SCGN	826.65	850.15	803.15	0.997004	-0.00432809	-0.036	0.800552	0.912949
chr19	41099072	41135725	+	LTBP4	410.6	409.55	411.65	0.997004	-0.00432809	-0.0362	0.800609	0.912923
chr12	40618813	40763086	+	LRRK2	18403.6	17711	19096.2	0.996008	-0.00577078	-0.0365	0.800695	0.912884
chr12	64845840	64895899	+	TBK1	668.225	647.55	688.9	0.996008	-0.00577078	-0.0369	0.800809	0.912832
chr5	76986995	77072185	-	TBCA	27463.8	26880.4	28047.2	0.995012	-0.00721348	-0.0374	0.800951	0.912767
chr6	160887587	160932156	-	LPAL2	674.075	677.05	671.1	0.996008	-0.00577078	-0.0381	0.80115	0.912676
chr5	96211644	96255406	+	ERAP2	1134.95	1159.65	1110.25	0.995012	-0.00721348	-0.0382	0.801179	0.912662
chr4	166300097	166419482	+	CPE	2821.5	2774.55	2868.45	0.997004	-0.00432809	-0.0384	0.801235	0.912636
chr17	18086867	18113267	+	ALKBH5	784.35	784.8	783.9	0.996008	-0.00577078	-0.0393	0.80149	0.912518
chr20	62328004	62330051	+	TNFRSF6B	1023.55	1046.2	1000.9	0.996008	-0.00577078	-0.0397	0.801604	0.912466
chr19	3777967	3801810	-	MATK	840.65	832.95	848.35	0.996008	-0.00577078	-0.04	0.801688	0.912426
chr3	99357440	99515577	+	COL8A1	711.6	717.9	705.3	0.996008	-0.00577078	-0.0408	0.801914	0.912321
chr10	52750911	54058110	+	PRKG1	62705.7	62039.2	63372.2	0.995012	-0.00721348	-0.0416	0.802139	0.912215
chr5	140571952	140575213	+	PCDHB10	4841.73	4877.9	4805.55	0.996008	-0.00577078	-0.0422	0.802308	0.912136
chr7	139478047	139720125	+	TBXAS1	2142.82	2158.3	2127.35	0.993024	-0.0100989	-0.0425	0.802392	0.912096
chr22	22020273	22052202	+	PPIL2	3091.3	3128.4	3054.2	0.996008	-0.00577078	-0.0425	0.802392	0.912096
chr4	124317950	124324915	+	SPRY1	2106.47	2106.95	2106	0.996008	-0.00577078	-0.0426	0.80242	0.912083
chr4	71859265	71896629	+	DCK	18318.8	18254.3	18383.3	0.995012	-0.00721348	-0.0435	0.802673	0.911963
chr16	81348571	81413803	+	GAN	1315.12	1312.8	1317.45	0.996008	-0.00577078	-0.0436	0.802701	0.91195
chr13	43787666	44361116	-	ENOX1	929.575	931.2	927.95	0.994018	-0.00865617	-0.0438	0.802756	0.911923
chrY	26191377	27771048	-	CDY1	735.175	729.55	740.8	0.996008	-0.00577078	-0.044	0.802812	0.911896
chr9	136080666	136084637	-	OBP2B	416.1	419.05	413.15	0.996008	-0.00577078	-0.045	0.803092	0.911763
chr2	242792033	242801058	-	PDCD1	706.35	700.8	711.9	0.996008	-0.00577078	-0.046	0.80337	0.911629
chr21	28290231	28339439	-	ADAMTS5	641.875	640.3	643.45	0.996008	-0.00577078	-0.0462	0.803425	0.911602
chr13	108921977	108960832	+	TNFSF13B	963	960.5	965.5	0.996008	-0.00577078	-0.0463	0.803453	0.911589
chr1	27248213	27273362	+	NUDC	48001.9	46665.4	49338.4	0.994018	-0.00865617	-0.0465	0.803509	0.911562
chr10	68685792	68861309	+	LRRTM3	269.125	258.2	280.05	0.996008	-0.00577078	-0.0467	0.803564	0.911535
chr19	42055886	42093197	+	CEACAM21	1201.55	1195.8	1207.3	0.996008	-0.00577078	-0.0479	0.803897	0.911373
chr20	56884771	56942563	+	RAB22A	13961.7	15370.3	12553	0.99005	-0.014427	-0.0483	0.804007	0.911319
chr7	155089486	155101945	+	INSIG1	628.1	628.85	627.35	0.996008	-0.00577078	-0.0487	0.804118	0.911265
chr3	49721380	49726196	-	MST1	269.95	269.3	270.6	0.995012	-0.00721348	-0.0489	0.804173	0.911238
chr7	107220422	107263762	+	BCAP29	994.1	984	1004.2	0.995012	-0.00721348	-0.0492	0.804256	0.911197
chr2	39476407	39664453	-	MAP4K3	479.175	486.15	472.2	0.995012	-0.00721348	-0.0494	0.804311	0.91117
chr18	52258390	52266724	+	DYNAP	54155.8	54064.6	54247.2	0.995012	-0.00721348	-0.0495	0.804338	0.911157
chr12	131356617	131360826	+	RAN	7698.1	7898.4	7497.8	0.982161	-0.0259685	-0.0509	0.804723	0.910966
chr17	39032141	39041495	-	KRT20	1424.85	1457.75	1391.95	0.995012	-0.00721348	-0.0513	0.804833	0.910912
chr7	129906703	129929637	+	CPA2	1620.08	1645.8	1594.35	0.996008	-0.00577078	-0.0514	0.80486	0.910898
chr13	113623535	113754053	+	MCF2L	1820.92	1827.45	1814.4	0.996008	-0.00577078	-0.0515	0.804887	0.910884
chr16	202854	204504	+	HBZ	21260.8	20204.7	22317	0.994018	-0.00865617	-0.0517	0.804942	0.910857
chr20	18794370	18795035	+	SCP2D1	250.95	251.35	250.55	0.995012	-0.00721348	-0.0517	0.804942	0.910857
chr4	7194374	7744564	+	SORCS2	271.475	275.75	267.2	0.995012	-0.00721348	-0.0519	0.804997	0.91083
chr8	9911779	10286401	+	MSRA	1319.55	1301.5	1337.6	0.995012	-0.00721348	-0.0525	0.805161	0.910748
chr7	100199882	100205798	+	PCOLCE	32292.6	30582.5	34002.7	0.97824	-0.0317393	-0.0527	0.805216	0.91072
chr8	56792386	56925006	+	LYN	314.05	301.35	326.75	0.980199	-0.0288539	-0.0529	0.80527	0.910693
chr14	60712470	60765805	+	PPM1A	10591.1	10631.9	10550.2	0.994018	-0.00865617	-0.0536	0.805461	0.910597
chr6	30899127	30899952	-	SFTA2	777.525	764.95	790.1	0.995012	-0.00721348	-0.0545	0.805706	0.910473
chr19	1065922	1087830	+	HMHA1	703.775	713.65	693.9	0.994018	-0.00865617	-0.0546	0.805733	0.910459
chr19	8023457	8070529	-	ELAVL1	7246.88	7261.75	7232	0.992032	-0.0115416	-0.0547	0.80576	0.910445
chr20	54944445	54967351	-	AURKA	2548.82	2540.45	2557.2	0.995012	-0.00721348	-0.0551	0.805868	0.91039
chr22	30636436	30642840	-	LIF	812.7	812.1	813.3	0.995012	-0.00721348	-0.0561	0.806139	0.910252
chr6	26020718	26021186	+	HIST1H3A	148276	143905	152648	0.99005	-0.014427	-0.0562	0.806166	0.910238
chr4	175839509	175899331	+	ADAM29	1159.33	1159.1	1159.55	0.995012	-0.00721348	-0.0565	0.806247	0.910196
chr5	148521054	148639999	+	ABLIM3	486.05	510.3	461.8	0.99104	-0.0129843	-0.0567	0.806301	0.910168
chr1	160799950	160832692	-	CD244	187.775	191.4	184.15	0.996008	-0.00577078	-0.0567	0.806301	0.910168
chr9	35099773	35103192	-	STOML2	58444.3	59447.8	57440.8	0.993024	-0.0100989	-0.0567	0.806301	0.910168
chr1	212606229	212619721	+	NENF	916.725	909.95	923.5	0.995012	-0.00721348	-0.0576	0.806544	0.910043
chr1	22963118	22966175	+	C1QA	2591.88	2571.95	2611.8	0.995012	-0.00721348	-0.0578	0.806598	0.910015
chr4	81187742	81212171	+	FGF5	1241.33	1259.1	1223.55	0.994018	-0.00865617	-0.0585	0.806786	0.909918
chr13	26828756	26978569	+	CDK8	3049.4	3066.8	3032	0.995012	-0.00721348	-0.0585	0.806786	0.909918
chr8	66626569	66753969	-	PDE7A	513.45	505.25	521.65	0.994018	-0.00865617	-0.0589	0.806894	0.909862
chr7	56169266	56174187	-	CHCHD2	898.375	897.2	899.55	0.995012	-0.00721348	-0.0597	0.807108	0.90975
chr18	25530930	25757445	-	CDH2	2169.35	2177.75	2160.95	0.994018	-0.00865617	-0.0599	0.807162	0.909722
chr10	87359312	88126250	-	GRID1	806.775	815.65	797.9	0.995012	-0.00721348	-0.0613	0.807535	0.909525
chr11	60869930	60895323	+	CD5	268.425	269.75	267.1	0.994018	-0.00865617	-0.0614	0.807562	0.909511
chr8	87484578	87521009	-	RMDN1	11724.1	11742.8	11705.4	0.99005	-0.014427	-0.0615	0.807589	0.909497
chr20	4666797	4682234	+	PRNP	1847.78	1834.65	1860.9	0.994018	-0.00865617	-0.0632	0.808041	0.909257
chr20	44258385	44259831	+	WFDC10A	1173.67	1179.65	1167.7	0.994018	-0.00865617	-0.0632	0.808041	0.909257
chr17	74620838	74639920	-	ST6GALNAC1	2081.5	2038.35	2124.65	0.993024	-0.0100989	-0.0633	0.808067	0.909243
chr22	22113947	22221970	-	MAPK1	34719.4	34416.7	35022.1	0.99104	-0.0129843	-0.0635	0.80812	0.909214
chr10	13263767	13276328	-	UCMA	10155.2	10120	10190.4	0.994018	-0.00865617	-0.0636	0.808147	0.9092
chr4	100044833	100065449	-	ADH4	8824.8	8460.55	9189.05	0.992032	-0.0115416	-0.0637	0.808173	0.909186
chr19	43011458	43032661	-	CEACAM1	565.5	573.15	557.85	0.994018	-0.00865617	-0.0638	0.8082	0.909172
chr6	49695092	49712168	-	CRISP3	265.25	264.85	265.65	0.994018	-0.00865617	-0.0641	0.808279	0.909129
chr5	126112315	126172712	+	LMNB1	3018.45	3035.85	3001.05	0.992032	-0.0115416	-0.0642	0.808305	0.909115
chr10	99186027	99193198	+	PGAM1	8469.27	8603.1	8335.45	0.981179	-0.0274112	-0.0643	0.808332	0.909101
chr16	29471207	30215650	+	SULT1A3	580.925	582.65	579.2	0.995012	-0.00721348	-0.0644	0.808358	0.909086
chr19	46623328	46627931	-	IGFL3	7320.5	7280.45	7360.55	0.99104	-0.0129843	-0.0648	0.808464	0.909029
chr4	48833060	48863834	+	OCIAD1	7203.25	7197.4	7209.1	0.994018	-0.00865617	-0.0652	0.80857	0.908972
chr19	43757435	43773682	-	PSG9	1824.58	1780.65	1868.5	0.993024	-0.0100989	-0.0666	0.808938	0.908772
chr4	166794410	167025609	+	TLL1	338.4	340.6	336.2	0.994018	-0.00865617	-0.0669	0.809017	0.908729
chr19	46272967	46285815	-	DMPK	342.2	343.85	340.55	0.994018	-0.00865617	-0.0672	0.809095	0.908686
chr12	48235320	48298814	-	VDR	2277.32	2242	2312.65	0.994018	-0.00865617	-0.0678	0.809253	0.9086
chr12	52416616	52453291	+	NR4A1	1063.72	1076.3	1051.15	0.993024	-0.0100989	-0.0686	0.809462	0.908485
chr1	174968571	174981163	+	CACYBP	72551.3	71536.9	73565.7	0.99005	-0.014427	-0.0688	0.809514	0.908456
chr12	6484534	6500737	+	LTBR	11404.4	11320.8	11488	0.993024	-0.0100989	-0.069	0.809566	0.908427
chr15	101811114	101817725	-	VIMP	7266.4	7193.55	7339.25	0.994018	-0.00865617	-0.0695	0.809697	0.908355
chrX	151995871	151999301	-	CETN2	74384.1	72086.8	76681.5	0.98906	-0.0158696	-0.0695	0.809697	0.908355
chr1	155036213	155042029	+	EFNA4	646.6	661.05	632.15	0.993024	-0.0100989	-0.07	0.809827	0.908283
chr19	10828729	10942586	+	DNM2	1370.22	1431.25	1309.2	0.977262	-0.033182	-0.0703	0.809905	0.908239
chr1	150954499	150968114	+	ANXA9	778.275	788.7	767.85	0.994018	-0.00865617	-0.0714	0.810191	0.90808
chr11	22644079	22647387	-	FANCF	625.725	637.55	613.9	0.994018	-0.00865617	-0.0716	0.810242	0.908051
chr1	153631130	153634328	+	SNAPIN	2731.22	2731.55	2730.9	0.993024	-0.0100989	-0.0716	0.810242	0.908051
chr13	31032879	31040081	-	HMGB1	49319.1	49434.1	49204.1	0.99005	-0.014427	-0.0716	0.810242	0.908051
chr10	91061706	91069033	+	IFIT2	5524.27	5617.25	5431.3	0.99104	-0.0129843	-0.0723	0.810424	0.907949
chr21	30671220	30734217	+	BACH1	2386.72	2404.2	2369.25	0.994018	-0.00865617	-0.0732	0.810656	0.907818
chr20	30028411	30038060	+	DEFB123	758.8	778.7	738.9	0.993024	-0.0100989	-0.0733	0.810682	0.907803
chr12	8666136	8674960	+	CLEC4D	1737.9	1715.1	1760.7	0.993024	-0.0100989	-0.0737	0.810785	0.907744
chr12	7247146	7261869	-	C1RL	349.05	349.1	349	0.992032	-0.0115416	-0.0741	0.810888	0.907686
chr22	19118321	19120136	+	TSSK2	1163.9	1171.3	1156.5	0.994018	-0.00865617	-0.0742	0.810914	0.907671
chr2	97371667	97405813	-	LMAN2L	5613.7	5704.4	5523	0.98906	-0.0158696	-0.0752	0.81117	0.907524
chr1	33327869	33338093	-	FNDC5	424.2	421.4	427	0.992032	-0.0115416	-0.0765	0.811503	0.907333
chr17	6977856	6983600	-	CLEC10A	998.475	1006.85	990.1	0.993024	-0.0100989	-0.0767	0.811554	0.907303
chr12	56347889	56360496	-	PMEL	2399.62	2419.65	2379.6	0.993024	-0.0100989	-0.0775	0.811758	0.907185
chr15	38227457	38243623	+	TMCO5A	756.1	754.35	757.85	0.993024	-0.0100989	-0.0777	0.811809	0.907155
chr2	64068098	64118696	+	UGP2	5686.48	5660.75	5712.2	0.982161	-0.0259685	-0.0784	0.811987	0.907051
chr15	41523437	41574083	+	CHP1	39177.1	39715.2	38639	0.99104	-0.0129843	-0.0784	0.811987	0.907051
chr1	10057255	10076078	+	RBP7	3873.65	3829.95	3917.35	0.992032	-0.0115416	-0.0784	0.811987	0.907051
chr13	48807274	48836232	+	ITM2B	18192.5	18715.3	17669.7	0.99104	-0.0129843	-0.0785	0.812013	0.907037
chr10	106013952	106027222	+	GSTO1	74984.8	72517.9	77451.6	0.982161	-0.0259685	-0.0785	0.812013	0.907037
chr19	15579457	15590315	-	PGLYRP2	686.2	689.6	682.8	0.992032	-0.0115416	-0.0793	0.812216	0.906918
chr6	31865562	31913451	+	C2	698.6	711.1	686.1	0.99104	-0.0129843	-0.0794	0.812241	0.906903
chr17	38218446	38250120	+	THRA	3188.68	3224.25	3153.1	0.994018	-0.00865617	-0.0806	0.812545	0.906724
chr22	20228938	20255816	-	RTN4R	327.15	326.3	328	0.993024	-0.0100989	-0.0808	0.812595	0.906694
chr19	17326155	17330638	+	USE1	1248.03	1222.4	1273.65	0.992032	-0.0115416	-0.0809	0.812621	0.906679
chr14	19983954	20020272	-	POTEM	210.725	210.8	210.65	0.993024	-0.0100989	-0.0816	0.812797	0.906574
chr17	61957572	61959302	-	GH2	433.9	442.75	425.05	0.992032	-0.0115416	-0.0818	0.812848	0.906544
chr17	7076751	7082883	-	ASGR1	1249.38	1252.25	1246.5	0.992032	-0.0115416	-0.0821	0.812923	0.906499
chr11	114310108	114321000	+	REXO2	98215.9	93649.6	102782	0.981179	-0.0274112	-0.0825	0.813024	0.906439
chr16	69743304	69760571	-	NQO1	113282	106700	119863	0.974335	-0.0375101	-0.0825	0.813024	0.906439
chr10	51947000	52008370	-	ASAH2	695	689.25	700.75	0.992032	-0.0115416	-0.0829	0.813124	0.906379
chr4	75230860	75254477	+	EREG	1174.42	1183.7	1165.15	0.993024	-0.0100989	-0.0831	0.813174	0.906348
chr10	52559169	52645435	-	A1CF	2044.83	2065.25	2024.4	0.993024	-0.0100989	-0.0835	0.813275	0.906288
chr9	37779711	37785089	-	EXOSC3	1451.2	1469.7	1432.7	0.992032	-0.0115416	-0.0836	0.8133	0.906273
chr12	65444404	65515346	-	WIF1	2492.5	2464.15	2520.85	0.993024	-0.0100989	-0.084	0.8134	0.906213
chr9	86582998	86595569	-	HNRNPK	563.65	563.1	564.2	0.992032	-0.0115416	-0.084	0.8134	0.906213
chr5	149493402	149535422	-	PDGFRB	983.425	981.1	985.75	0.99104	-0.0129843	-0.0845	0.813525	0.906137
chr6	137321108	137366317	-	IL20RA	244.075	242.7	245.45	0.992032	-0.0115416	-0.0845	0.813525	0.906137
chr9	97320996	97356114	-	FBP2	1735.42	1753.95	1716.9	0.992032	-0.0115416	-0.086	0.813899	0.90591
chr9	117781854	117880536	-	TNC	1890.05	2035.9	1744.2	0.981179	-0.0274112	-0.0869	0.814122	0.905773
chr11	70116806	70230607	+	PPFIA1	1626.12	1620.9	1631.35	0.992032	-0.0115416	-0.0871	0.814172	0.905742
chr11	4115924	4160106	+	RRM1	82183.6	85668.6	78698.6	0.986098	-0.0201977	-0.0873	0.814222	0.905712
chr12	67663061	67708388	+	CAND1	935.2	931.85	938.55	0.993024	-0.0100989	-0.0874	0.814246	0.905696
chr15	77713243	77777945	+	HMG20A	13221.4	13936.5	12506.3	0.988072	-0.0173123	-0.0876	0.814296	0.905666
chr12	108983622	108991894	-	TMEM119	7904.7	8073.4	7736	0.987084	-0.018755	-0.088	0.814395	0.905605
chr4	122589152	122618147	-	ANXA5	28423.8	31181.5	25666.1	0.97824	-0.0317393	-0.0898	0.814839	0.905329
chr9	101705995	101833074	+	COL15A1	746.45	613.55	879.35	0.956954	-0.0634786	-0.0899	0.814864	0.905313
chr1	171669296	171711379	-	VAMP4	733.1	746	720.2	0.992032	-0.0115416	-0.0899	0.814864	0.905313
chr1	157800704	157811634	-	CD5L	420.475	420.05	420.9	0.992032	-0.0115416	-0.0903	0.814962	0.905252
chr22	48885272	49147747	+	FAM19A5	1011.3	1023.8	998.8	0.99104	-0.0129843	-0.0903	0.814962	0.905252
chr1	159682079	159684379	-	CRP	1239.38	1256.4	1222.35	0.99104	-0.0129843	-0.0903	0.814962	0.905252
chr11	63766030	63933585	-	MACROD1	3187.25	3282.2	3092.3	0.98906	-0.0158696	-0.092	0.815379	0.904989
chr4	74719013	74720198	+	PF4V1	764.025	766.1	761.95	0.992032	-0.0115416	-0.0921	0.815403	0.904974
chr19	33087907	33166102	-	ANKRD27	1960.88	1934.8	1986.95	0.992032	-0.0115416	-0.0941	0.815891	0.904663
chr11	19203577	19232118	-	CSRP3	15323.5	13532.5	17114.3	0.973361	-0.0389528	-0.0942	0.815915	0.904648
chr12	89741602	89746636	-	DUSP6	9054.73	8775.55	9333.9	0.98906	-0.0158696	-0.0943	0.81594	0.904632
chr7	99699130	99704803	+	AP4M1	2421.35	2409.7	2433	0.99104	-0.0129843	-0.0943	0.81594	0.904632
chr19	49519237	49520347	-	LHB	905.525	915.1	895.95	0.992032	-0.0115416	-0.0946	0.816013	0.904585
chr22	30658819	30662829	-	OSM	4105.35	4107.5	4103.2	0.992032	-0.0115416	-0.0949	0.816085	0.904538
chr5	133492082	133512724	-	SKP1	6154	6395.35	5912.65	0.987084	-0.018755	-0.0951	0.816134	0.904507
chr2	27719706	27746550	+	GCKR	1128.35	1125.1	1131.6	0.99104	-0.0129843	-0.0962	0.8164	0.904335
chr9	132815985	132902448	+	GPR107	137.075	137.85	136.3	0.99104	-0.0129843	-0.0967	0.816521	0.904257
chr17	44590076	44633014	+	LRRC37A2	1401.97	1412.55	1391.4	0.99005	-0.014427	-0.0968	0.816545	0.904241
chr16	11772943	11836648	-	TXNDC11	584.5	587.15	581.85	0.99005	-0.014427	-0.0974	0.81669	0.904147
chr20	30053309	30060816	-	DEFB124	3683.35	3697.8	3668.9	0.99104	-0.0129843	-0.0977	0.816762	0.904099
chr1	236139132	236228481	-	NID1	335.45	331.8	339.1	0.99104	-0.0129843	-0.0978	0.816786	0.904084
chr21	46683843	46707811	-	POFUT2	4061.15	4204.2	3918.1	0.992032	-0.0115416	-0.098	0.816834	0.904052
chr1	161736034	161933860	+	ATF6	2053.53	2060.2	2046.85	0.992032	-0.0115416	-0.0984	0.81693	0.903989
chr19	53517344	53519833	+	ERVV-1	2271.53	2296.05	2247	0.99005	-0.014427	-0.0987	0.817002	0.903942
chr5	78073037	78282357	-	ARSB	2035.8	2051.5	2020.1	0.988072	-0.0173123	-0.0989	0.81705	0.90391
chr10	28339923	28571067	-	MPP7	8823.8	8703.4	8944.2	0.98906	-0.0158696	-0.099	0.817074	0.903894
chr2	21224301	21266945	-	APOB	697.6	701.4	693.8	0.992032	-0.0115416	-0.099	0.817074	0.903894
[truncated: 1,518 more rows]
